# Supplementary material for: In Vitro and In Silico Evaluation of Cholinesterase Inhibition by Alkaloids Obtained from Branches of Abuta panurensis Eichler
Source: MDPI journal article supplement (doi:10.3390/molecules27103138), 2022-05-13
Supplement: s1 [file s1]

Supplementary Material

***In vitro* and *in silico* Evaluation of Cholinesterase Inhibition  
by Alkaloids Obtained from Branches of *Abuta panurensis* Eichler**

by

Rochelly da S. Mesquita, Andrii Kyrylchuk, Anton Cherednichenko, Ingridy S. C. Sá,  
Lílian M. Bastos, Felipe M. A. da Silva, Rita de C. S. Nunomura, and Andriy Grafov\*

## Table of Contents

| Item       | Description                                                                                                                                                            | Pages |
|------------|------------------------------------------------------------------------------------------------------------------------------------------------------------------------|-------|
| Figure S1  | <sup>1</sup> H NMR spectrum (500 MHz, CD <sub>3</sub> OD d <sub>6</sub> , TMS) of lindoldhamine isomer.                                                                | 5     |
| Figure S2  | Expanded low-field regions of the <sup>1</sup> H NMR spectrum (500 MHz, CD <sub>3</sub> OD d <sub>6</sub> , TMS) of lindoldhamine isomer.                              | 6     |
| Figure S3  | HSQC spectrum (125 MHz, CD <sub>3</sub> OD, TMS) of lindoldhamine isomer.                                                                                              | 7     |
| Figure S4  | Expanded regions of the HSQC spectrum (125 MHz, CD <sub>3</sub> OD, TMS) of lindoldhamine isomer.                                                                      | 8     |
| Figure S5  | HMBC spectrum (125 MHz, CD <sub>3</sub> OD, TMS) of lindoldhamine isomer.                                                                                              | 9     |
| Figure S6  | Expanded regions of the HMBC spectrum (125 MHz, CD <sub>3</sub> OD, TMS) of lindoldhamine isomer.                                                                      | 10    |
| Table S1   | NMR chemical shifts of lindoldhamine isomer. The experiments were realized in CD <sub>3</sub> OD at magnetic field strength of 11.7 T; 500 MHz for <sup>1</sup> H NMR. | 11    |
| Figure S7  | Mass spectrum (MS/MS) of lindoldhamine isomer with chemical structure and identification of the main fragment ions.                                                    | 12    |
| Figure S8  | Hight resolution mass-spectrum of lindoldhamine isomer with chemical structure.                                                                                        | 13    |
| Figure S9  | <sup>1</sup> H NMR spectrum (500 MHz, CD <sub>3</sub> OD, TMS) of stepharine.                                                                                          | 14    |
| Figure S10 | Expanded regions of the <sup>1</sup> H NMR spectrum (500 MHz, CD <sub>3</sub> OD, TMS) of stepharine.                                                                  | 15    |
| Figure S11 | Expanded regions of the <sup>1</sup> H NMR spectrum (500 MHz, CD <sub>3</sub> OD, TMS) of stepharine.                                                                  | 16    |
| Figure S12 | HSQC spectrum (125 MHz, CD <sub>3</sub> OD, TMS) of stepharine.                                                                                                        | 17    |
| Figure S13 | Expanded regions of the HSQC spectrum (125 MHz, CD <sub>3</sub> OD, TMS) of stepharine.                                                                                | 18    |
| Figure S14 | HMBC spectrum (125 MHz, CD <sub>3</sub> OD, TMS) of stepharine.                                                                                                        | 19    |
| Figure S15 | Expanded regions of the HMBC spectrum (125 MHz, CD <sub>3</sub> OD, TMS) of stepharine.                                                                                | 20    |
| Table S2   | NMR chemical shifts of stepharine. The experiments were realized in CD <sub>3</sub> OD at magnetic field strength of 11.7 T; 500 MHz for <sup>1</sup> H NMR.           | 21    |
| Figure S16 | Mass spectrum (MS/MS) of stepharine with chemical structure and identification of the main fragment ions.                                                              | 22    |
| Figure S17 | Hight resolution mass spectrum of stepharine with chemical structure.                                                                                                  | 23    |
| Figure S18 | <sup>1</sup> H NMR spectrum (500 MHz, CD <sub>3</sub> OD d <sub>6</sub> , TMS) of palmatine.                                                                           | 24    |
| Figure S19 | Expanded low-field region of the <sup>1</sup> H NMR spectrum (500 MHz, CD <sub>3</sub> OD d <sub>6</sub> , TMS) of palmatine.                                          | 25    |
| Figure S20 | HSQC spectrum (125 MHz, CD <sub>3</sub> OD, TMS) of palmatine.                                                                                                         | 26    |
| Figure S21 | Expanded regions of the HSQC spectrum (125 MHz, CD <sub>3</sub> OD, TMS) of palmatine.                                                                                 | 27    |
| Figure S22 | HMBC spectrum (125 MHz, CD <sub>3</sub> OD, TMS) of palmatine.                                                                                                         | 28    |
| Figure S23 | Expanded regions of the HMBC spectrum (125 MHz, CD <sub>3</sub> OD, TMS) of palmatine.                                                                                 | 29    |
| Table S3   | NMR chemical shifts of palmatine. The experiments were realized in CD <sub>3</sub> OD at magnetic field strength of 11.7 T; 500 MHz for <sup>1</sup> H NMR.            | 30    |

## Table of Contents (continuation)

| Item       | Description                                                                                                                                                                                          | Pages |
|------------|------------------------------------------------------------------------------------------------------------------------------------------------------------------------------------------------------|-------|
| Figure S24 | Mass spectrum (MS/MS) of palmatine with chemical structure and identification of the main fragment ions.                                                                                             | 31    |
| Figure S25 | Hight resolution mass-spectrum of palmatine with chemical structure.                                                                                                                                 | 32    |
| Figure S26 | $^1\text{H}$ NMR spectrum (500 MHz, DMSO $d_6$ , TMS) of 5- <i>N</i> -methylmaytenine.                                                                                                               | 33    |
| Figure S27 | Expanded low-field region of the $^1\text{H}$ NMR spectrum (500 MHz, DMSO $d_6$ , TMS) of 5- <i>N</i> -methylmaytenine.                                                                              | 34    |
| Figure S28 | $^{13}\text{C}$ NMR spectrum (125 MHz, DMSO $d_6$ , TMS) of 5- <i>N</i> -methylmaytenine.                                                                                                            | 35    |
| Figure S29 | Expanded regions of the $^{13}\text{C}$ NMR spectrum (125 MHz, DMSO $d_6$ , TMS) of 5- <i>N</i> -methylmaytenine.                                                                                    | 36    |
| Figure S30 | Expanded regions of the $^{13}\text{C}$ NMR spectrum (125 MHz, DMSO $d_6$ , TMS) of 5- <i>N</i> -methylmaytenine.                                                                                    | 37    |
| Figure S31 | Expanded region of the $^{13}\text{C}$ NMR spectrum (125 MHz, DMSO $d_6$ , TMS) of 5- <i>N</i> -methylmaytenine.                                                                                     | 38    |
| Figure S32 | HMBC spectrum (125 MHz, DMSO $d_6$ , TMS) of 5- <i>N</i> -methylmaytenine.                                                                                                                           | 39    |
| Figure S33 | Expanded regions of the HMBC spectrum (125 MHz, DMSO $d_6$ , TMS) of 5- <i>N</i> -methylmaytenine.                                                                                                   | 40    |
| Figure S34 | HSQC spectrum (125 MHz, DMSO $d_6$ , TMS) of 5- <i>N</i> -methylmaytenine.                                                                                                                           | 41    |
| Figure S35 | Expanded regions of the HSQC spectrum (125 MHz, DMSO $d_6$ , TMS) of 5- <i>N</i> -methylmaytenine.                                                                                                   | 42    |
| Figure S36 | DEPT-135° spectrum (125 MHz, DMSO $d_6$ , TMS) of 5- <i>N</i> -methylmaytenine.                                                                                                                      | 43    |
| Figure S37 | Expanded regions of the DEPT-135° spectrum (125 MHz, DMSO $d_6$ , TMS) of 5- <i>N</i> -methylmaytenine.                                                                                              | 44    |
| Table S4   | NMR chemical shifts of 5- <i>N</i> -methylmaitenine. The experiments were realized in DMSO $d_6$ at magnetic field strength of 11.7 T; 500 MHz for $^1\text{H}$ and 125 MHz for $^{13}\text{C}$ NMR. | 45    |
| Figure S38 | Mass spectrum (MS/MS) of 5- <i>N</i> -methylmaytenine with chemical structure and identification of the main fragment ions.                                                                          | 46    |
| Figure S39 | Hight resolution mass-spectrum of 5- <i>N</i> -methylmaytenine with chemical structure.                                                                                                              | 47    |
| Figure S40 | $^1\text{H}$ NMR spectrum (500 MHz, CD <sub>3</sub> OD $d_6$ , TMS) of <i>N-trans</i> -feruloyltyramine.                                                                                             | 48    |
| Figure S41 | Expanded low-field region of the $^1\text{H}$ NMR spectrum (500 MHz, CD <sub>3</sub> OD $d_6$ , TMS) <i>N-trans</i> -feruloyltyramine.                                                               | 49    |
| Figure S42 | HSQC spectrum (125 MHz, CD <sub>3</sub> OD, TMS) <i>N-trans</i> -feruloyltyramine.                                                                                                                   | 50    |
| Figure S43 | Expanded regions of the HSQC spectrum (125 MHz, CD <sub>3</sub> OD, TMS) <i>N-trans</i> -feruloyltyramine.                                                                                           | 51    |
| Figure S44 | HMBC spectrum (125 MHz, CD <sub>3</sub> OD, TMS) of <i>N-trans</i> -feruloyltyramine.                                                                                                                | 52    |
| Figure S45 | Expanded regions of the HMBC spectrum (125 MHz, CD <sub>3</sub> OD, TMS) of <i>N-trans</i> -feruloyltyramine.                                                                                        | 53    |
| Table S5   | NMR chemical shifts of <i>N-trans</i> -feruloyltyramine. The experiments were realized in CD <sub>3</sub> OD at magnetic field strength of 11.7 T; 500 MHz for $^1\text{H}$ NMR.                     | 54    |

## Table of Contents (continuation)

| Item       | Description                                                                                                                     | Pages   |
|------------|---------------------------------------------------------------------------------------------------------------------------------|---------|
| Figure S46 | Mass spectrum (MS/MS) of <i>N-trans</i> -feruloyltyramine with chemical structure and identification of the main fragment ions. | 55      |
| Figure S47 | Hight resolution mass-spectrum of <i>N-trans</i> -feruloyltyramine with chemical structure.                                     | 56      |
| Report S1  | MD Simulation Report on AChE - Neostigmine Interactions.                                                                        | 57-67   |
| Report S2  | MD Simulation Report on AChE - Lindoldhamine Isomer Interactions.                                                               | 68-79   |
| Report S3  | MD Simulation Report on AChE - Stepharine Interactions.                                                                         | 80-90   |
| Report S4  | MD Simulation Report on AChE - Palmatine Interactions.                                                                          | 91-101  |
| Report S5  | MD Simulation Report on AChE - 5- <i>N</i> -Methylmaytenine Interactions.                                                       | 102-112 |
| Report S6  | MD Simulation Report on AChE - <i>N-trans</i> -Feruloyltyramine Interactions.                                                   | 113-122 |
| Report S7  | MD Simulation Report on BChE - Neostigmine Interactions.                                                                        | 123-132 |
| Report S8  | MD Simulation Report on BChE - Lindoldhamine Isomer Interactions.                                                               | 133-144 |
| Report S9  | MD Simulation Report on BChE - Stepharine Interactions.                                                                         | 145-156 |
| Report S10 | MD Simulation Report on BChE - Palmatine Interactions.                                                                          | 157-167 |
| Report S11 | MD Simulation Report on BChE - 5- <i>N</i> -Methylmaytenine Interactions.                                                       | 168-178 |
| Report S12 | MD Simulation Report on BChE - <i>N-trans</i> -Feruloyltyramine Interactions.                                                   | 179-188 |



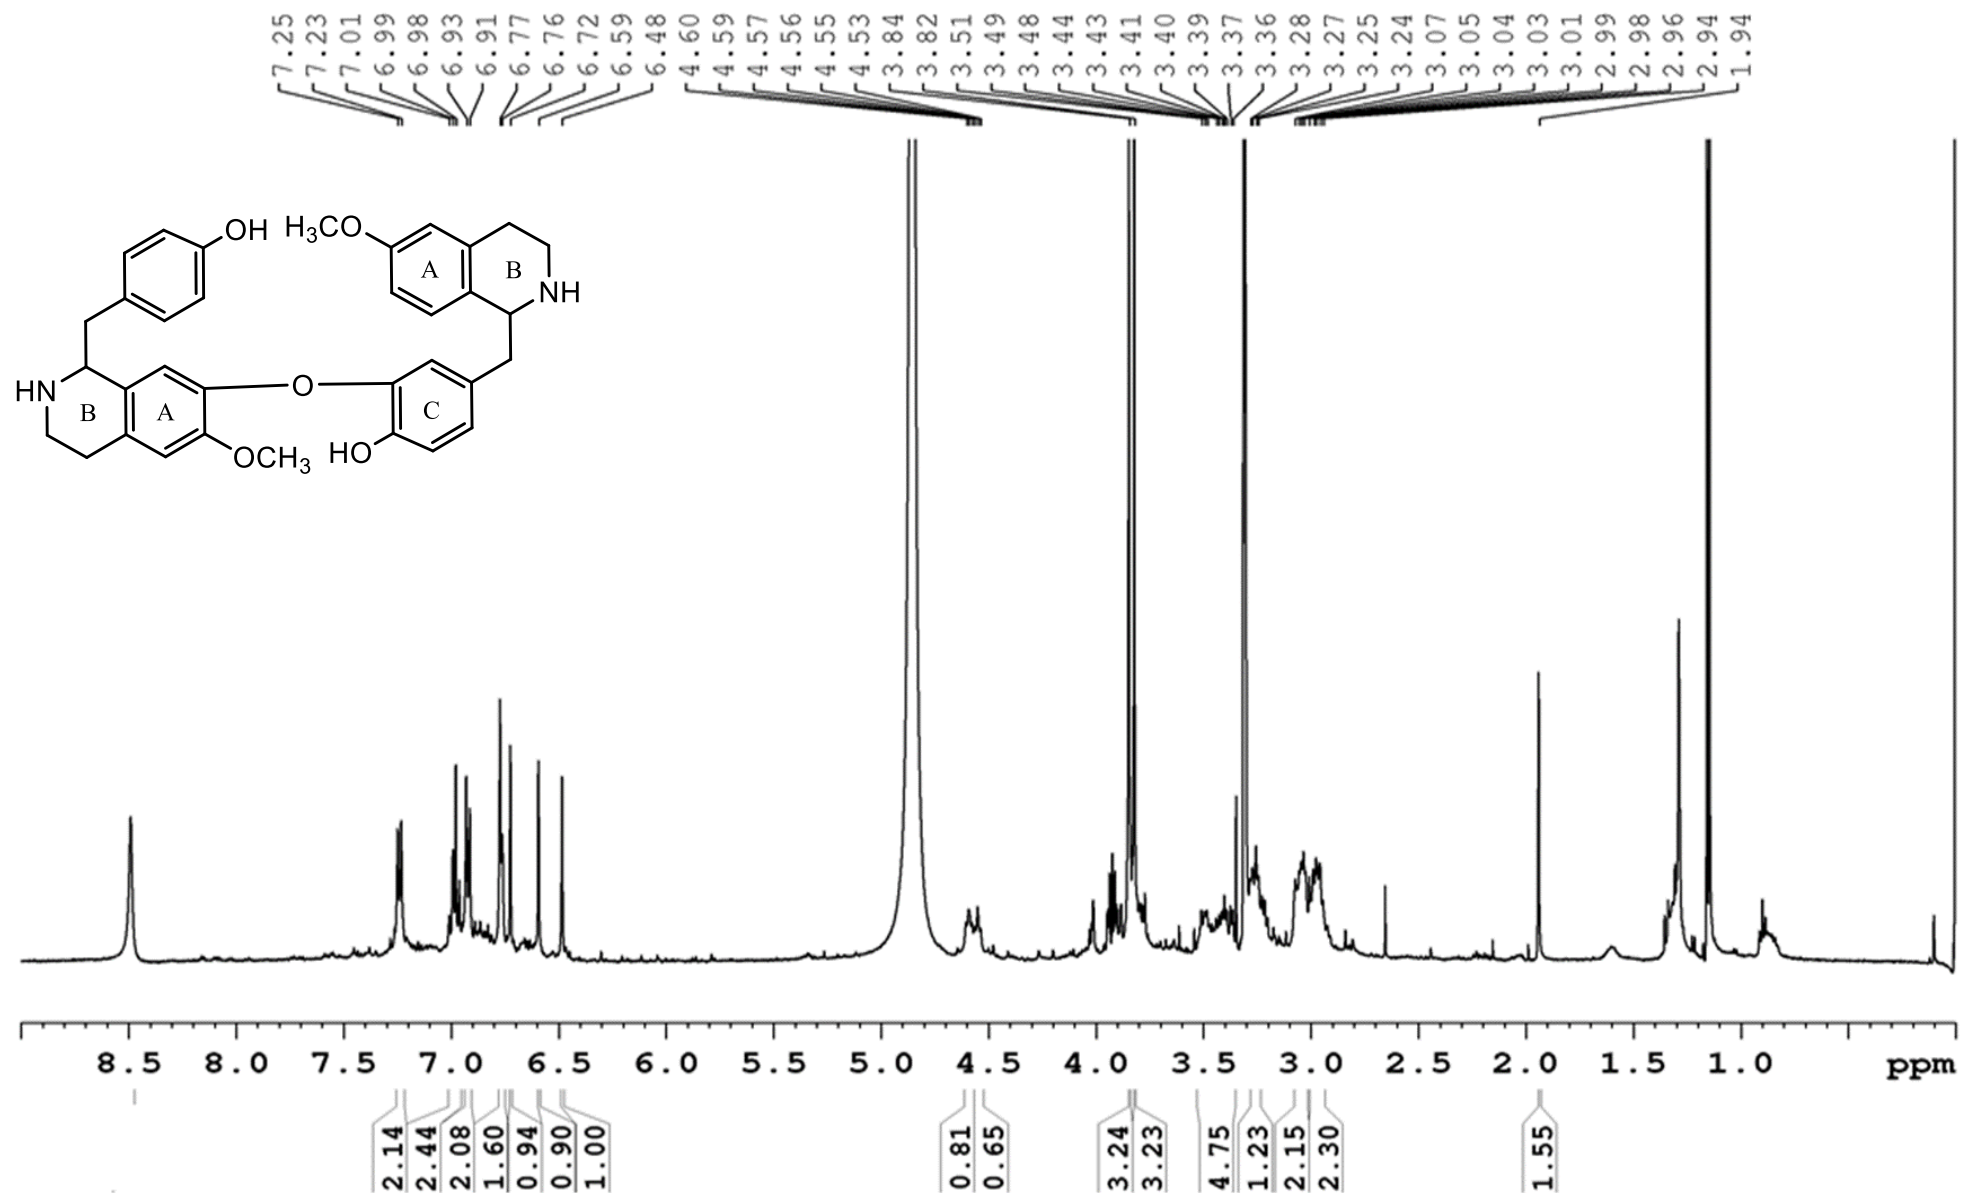

Current Data Parameters

|        |   |
|--------|---|
| NAME   |   |
| EXPNO  | 1 |
| PROCNO | 1 |

F2 - Acquisition Parameters

|         |                 |
|---------|-----------------|
| Date_   |                 |
| Time    | 16.46 h         |
| INSTRUM | spect           |
| PROBHD  | Z119470_0223 (  |
| PULPROG | zg30            |
| TD      | 65536           |
| SOLVENT | MeOD            |
| NS      | 32              |
| DS      | 2               |
| SWH     | 10000.000 Hz    |
| FIDRES  | 0.305176 Hz     |
| AQ      | 3.2767999 sec   |
| RG      | 187.25          |
| DW      | 50.000 usec     |
| DE      | 10.00 usec      |
| TE      | 298.1 K         |
| D1      | 1.00000000 sec  |
| TD0     | 1               |
| SFO1    | 500.1330883 MHz |
| NUC1    | 1H              |
| P0      | 3.43 usec       |
| P1      | 10.30 usec      |
| PLW1    | 20.32299995 W   |

F2 - Processing parameters

|     |                 |
|-----|-----------------|
| SI  | 131072          |
| SF  | 500.1300116 MHz |
| WDW | EM              |
| SSB | 0               |
| LB  | 0.30 Hz         |
| GB  | 0               |
| PC  | 1.00            |

Figure S1: <sup>1</sup>H NMR spectrum (500 MHz, CD<sub>3</sub>OD d<sub>6</sub>, TMS) of lindoldhamine isomer.

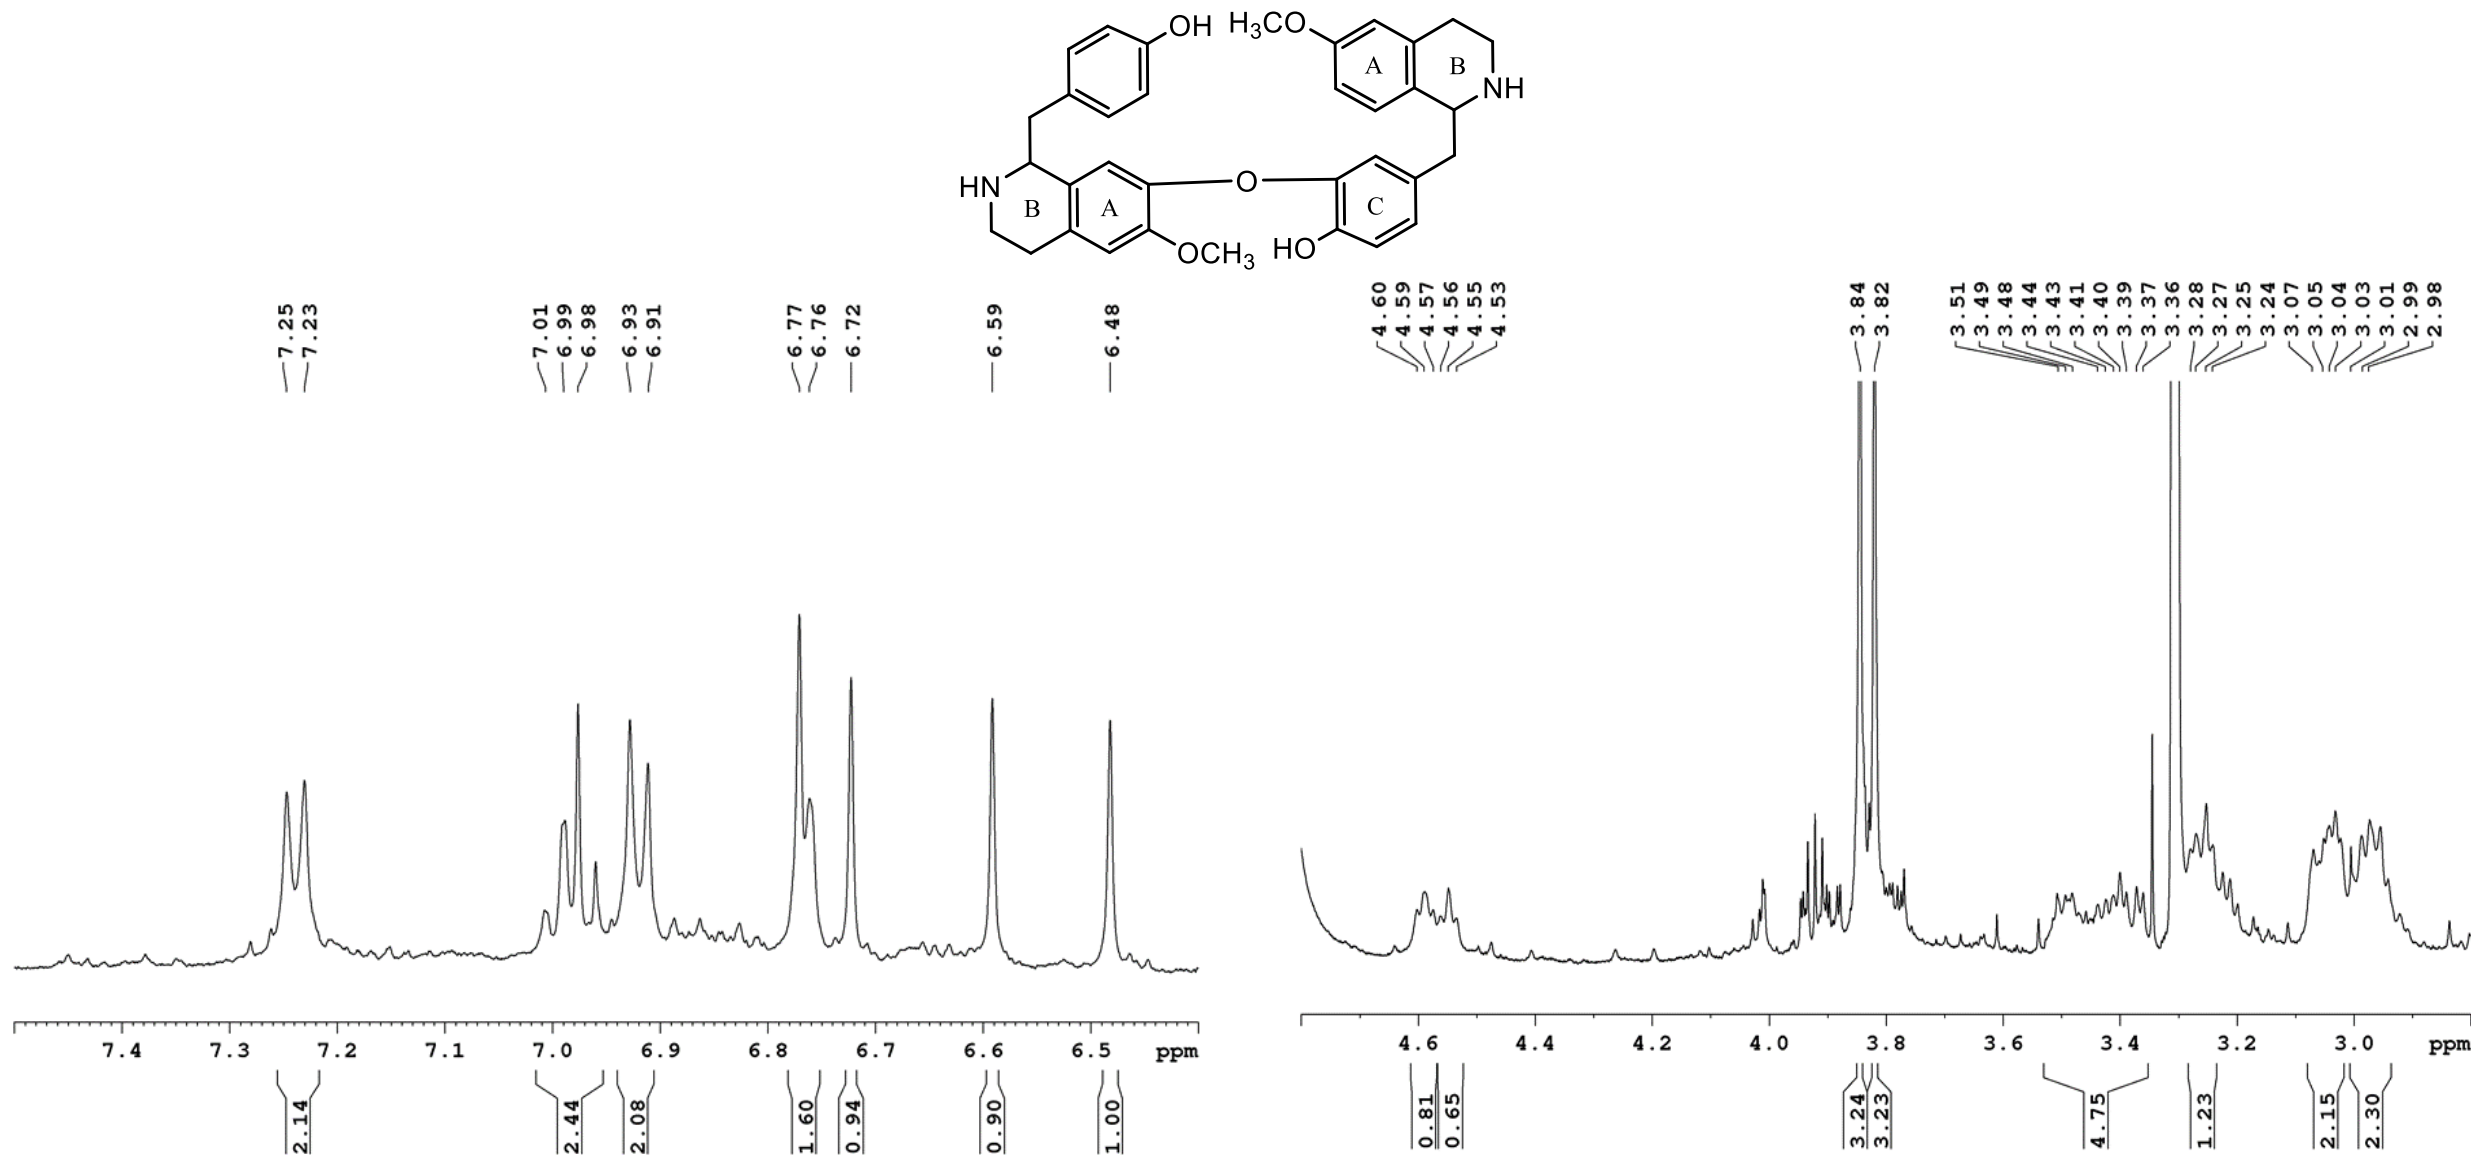

**Figure S2: Expanded low-field regions of the  $^1\text{H}$  NMR spectrum (500 MHz,  $\text{CD}_3\text{OD}$   $d_6$ , TMS) of lindoldhamine isomer.**

Current Data Parameters  
NAME  
EXPNO 200  
PROCNO 1

F2 - Acquisition Parameters  
Date\_ 21.13 h  
Time 21.13 h  
INSTRUM spect  
PROBHD z119470\_0223 {  
PULPROG hsqcetgpsisg2.2  
TD 2048  
SOLVENT MeOD  
NS 64  
DS 16  
SWH 5804.954 Hz  
FIDRES 2.834450 Hz  
AQ 0.1764011 sec  
RG 187.25  
DW 86.133 usec  
DE 10.00 usec  
TE 298.2 K  
CNST2 145.0000000  
CNST17 -0.5000000  
D0 0.00000300 sec  
D1 1.00000000 sec  
D4 0.00172414 sec  
D11 0.03000000 sec  
D16 0.00020000 sec  
D24 0.00089000 sec  
IN0 0.00001850 sec  
TDav 1  
SFO1 500.1322610 MHz  
NUC1 1H  
P1 9.40 usec  
P2 18.80 usec  
P28 1000.00 usec  
PLW1 20.32299995 W  
SFO2 125.7703643 MHz  
NUC2 13C  
CPDPRG2 garp  
P3 10.00 usec  
P14 500.00 usec  
P24 2000.00 usec  
PCPD2 70.00 usec  
PLW0 0 W  
PLW2 88.00000000 W  
PLW12 1.78668594 W  
SPNAM[3] Crp60,0.5,20.1  
SFOAL3 0.500  
SPOFFS3 0 Hz  
SPW3 13.44499969 W  
SPNAM[7] Crp60comp,4  
SFOAL7 0.500  
SPOFFS7 0 Hz  
SPW7 13.44499969 W  
GFNAM[1] SMSQ10.100  
GPZ1 80.00 %  
GFNAM[2] SMSQ10.100  
GPZ2 20.10 %  
GFNAM[3] SMSQ10.100  
GPZ3 11.00 %  
GFNAM[4] SMSQ10.100  
GPZ4 -5.00 %  
P16 1000.00 usec  
P19 600.00 usec

F1 - Acquisition parameters  
TD 256  
SFO1 125.7704 MHz  
FIDRES 211.148651 Hz  
SW 214.892 ppm  
FrMODE Echo-Antiecho

F2 - Processing parameters  
SI 4096  
SF 500.1300109 MHz  
WDW QSINE  
SSB 2  
LB 0 Hz  
GB 0  
PC 1.40

F1 - Processing parameters  
SI 1024  
MC2 echo-antiecho  
SF 125.7577790 MHz  
WDW QSINE  
SSB 2  
LB 0 Hz  
GB 0

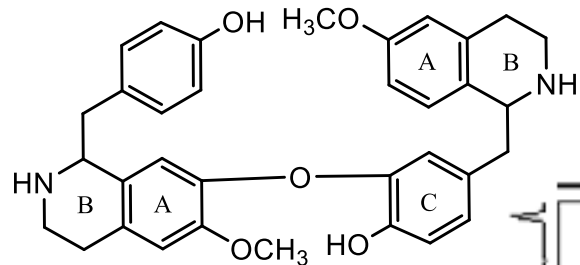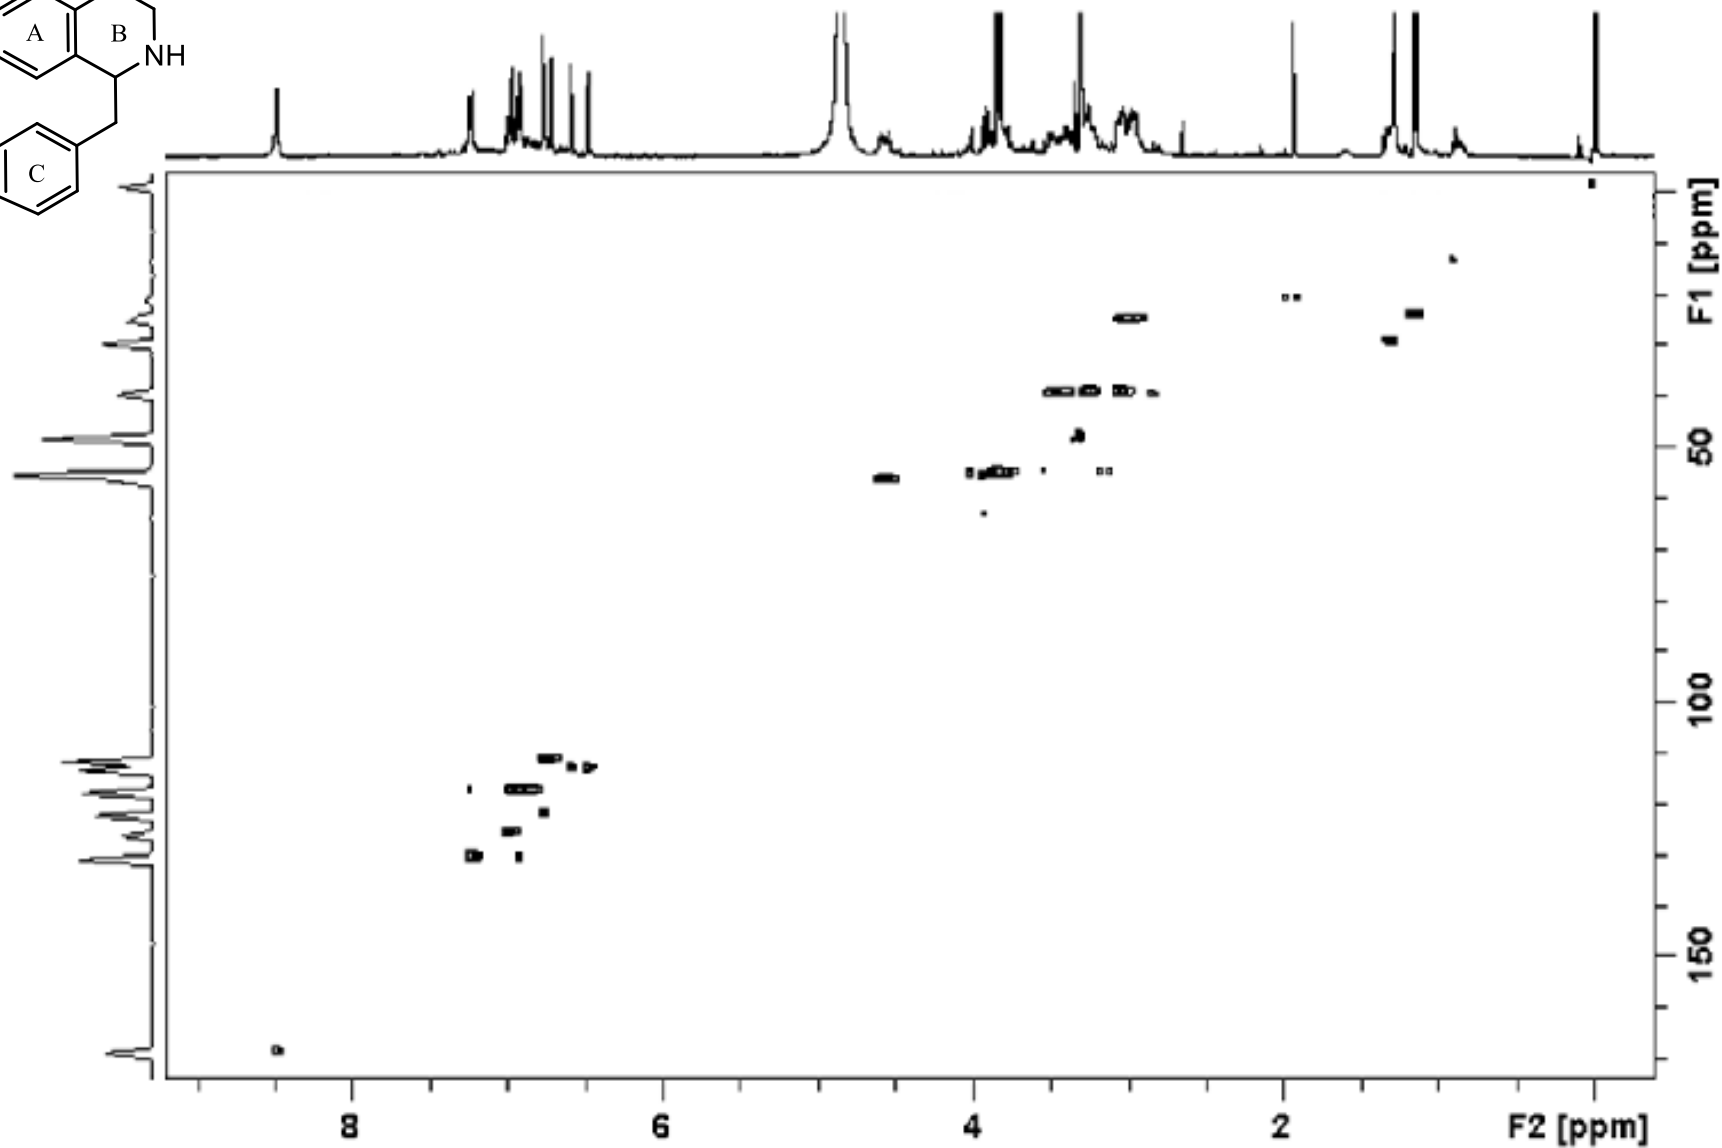

**Figure S3: HSQC spectrum (125 MHz, CD<sub>3</sub>OD, TMS) of lindoldhamine isomer.**

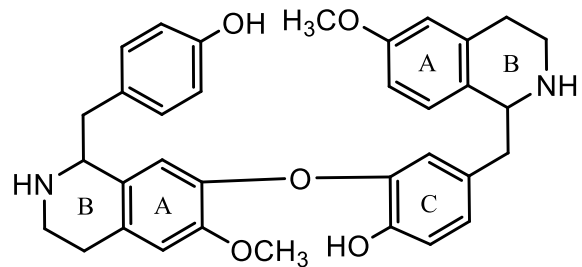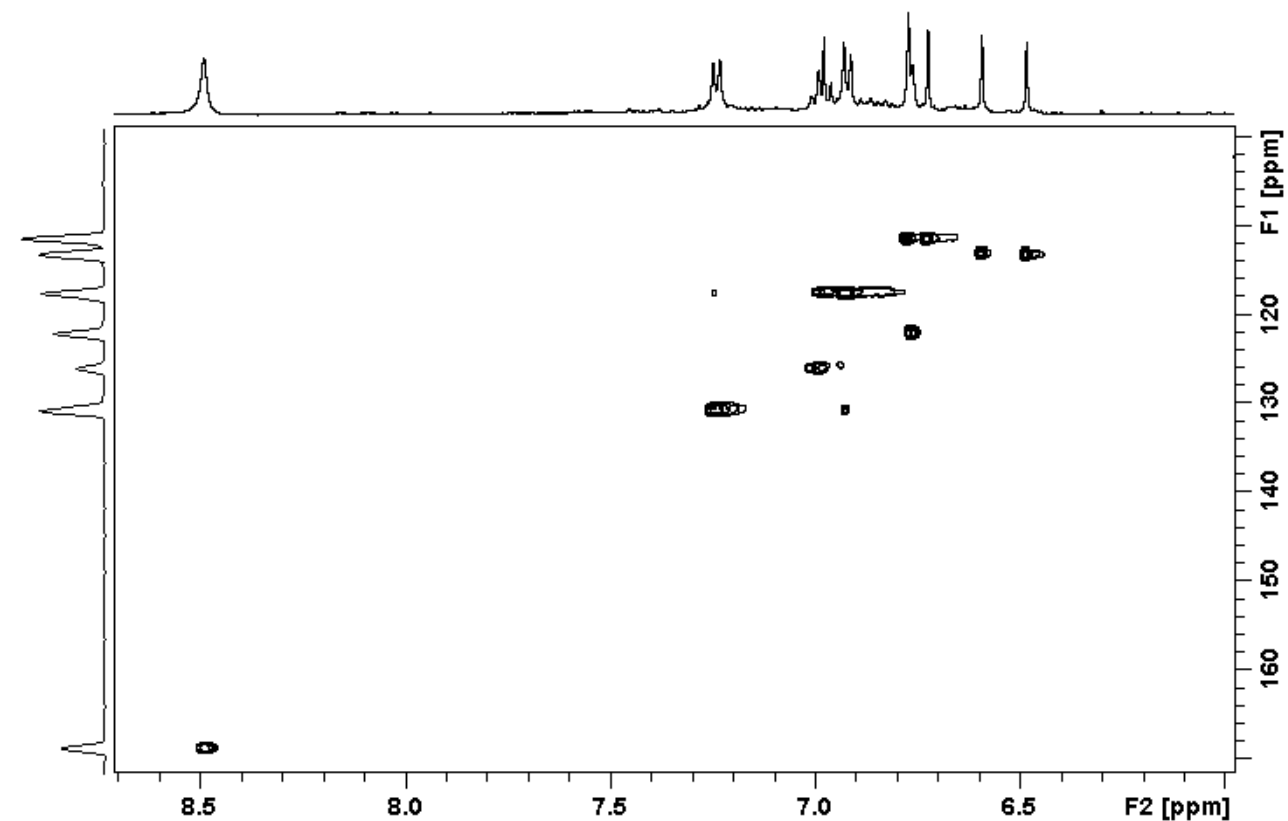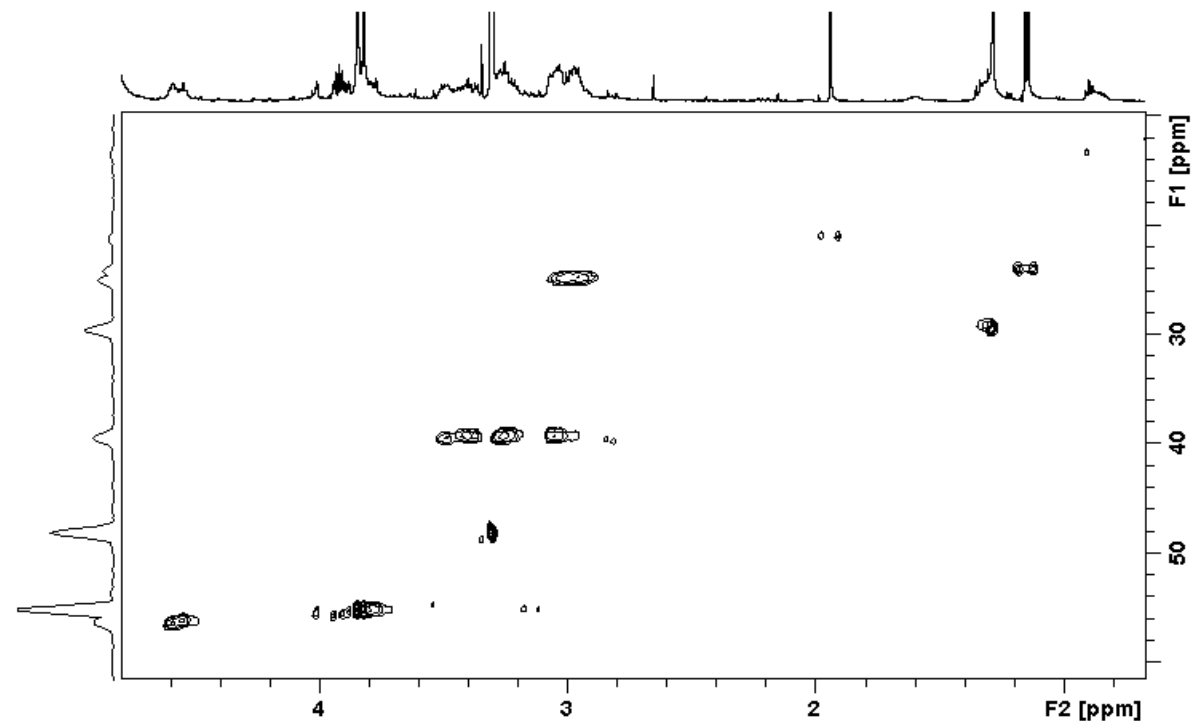

**Figure S4: Expanded regions of the HSQC spectrum (125 MHz, CD<sub>3</sub>OD, TMS) of lindoldhamine isomer.**

Current Data Parameters  
NAME  
EXPNO 300  
PROCNO 1

F2 - Acquisition Parameters  
Date  
Time 2.44 h  
INSTRUM spect  
PROBHD Z119470\_0223 (  
PULPROG hmbcgp1pndqf  
TD 2048  
SOLVENT MeOD  
NS 184  
DS 16  
SWH 5804.954 Hz  
FIDRES 2.834450 Hz  
AQ 0.1764011 sec  
RG 187.25  
DW 86.133 usec  
DE 10.00 usec  
TE 298.1 K  
CNST2 145.0000000  
CNST13 8.0000000  
D0 0.00000300 sec  
D1 1.00000000 sec  
D2 0.00344828 sec  
D6 0.06250000 sec  
D16 0.00020000 sec  
IN0 0.00001660 sec  
TDav 1  
SFO1 500.1322610 MHz  
NUC1 1H  
P1 9.40 usec  
P2 18.80 usec  
PLW1 20.32299995 W  
SFO2 125.7716219 MHz  
NUC2 13C  
P3 10.00 usec  
PLW2 88.00000000 W  
GPNAM[1] SMSQ10.100  
GPZ1 50.00 %  
GPNAM[2] SMSQ10.100  
GPZ2 30.00 %  
GPNAM[3] SMSQ10.100  
GPZ3 40.10 %  
P16 1000.00 usec

F1 - Acquisition parameters  
TD 294  
SFO1 125.7716 MHz  
FIDRES 204.901245 Hz  
SW 239.486 ppm  
FnMODE QF

F2 - Processing parameters  
SI 4096  
SF 500.1300121 MHz  
WDW SINE  
SSB 0  
LB 0 Hz  
GB 0  
PC 1.40

F1 - Processing parameters  
SI 1024

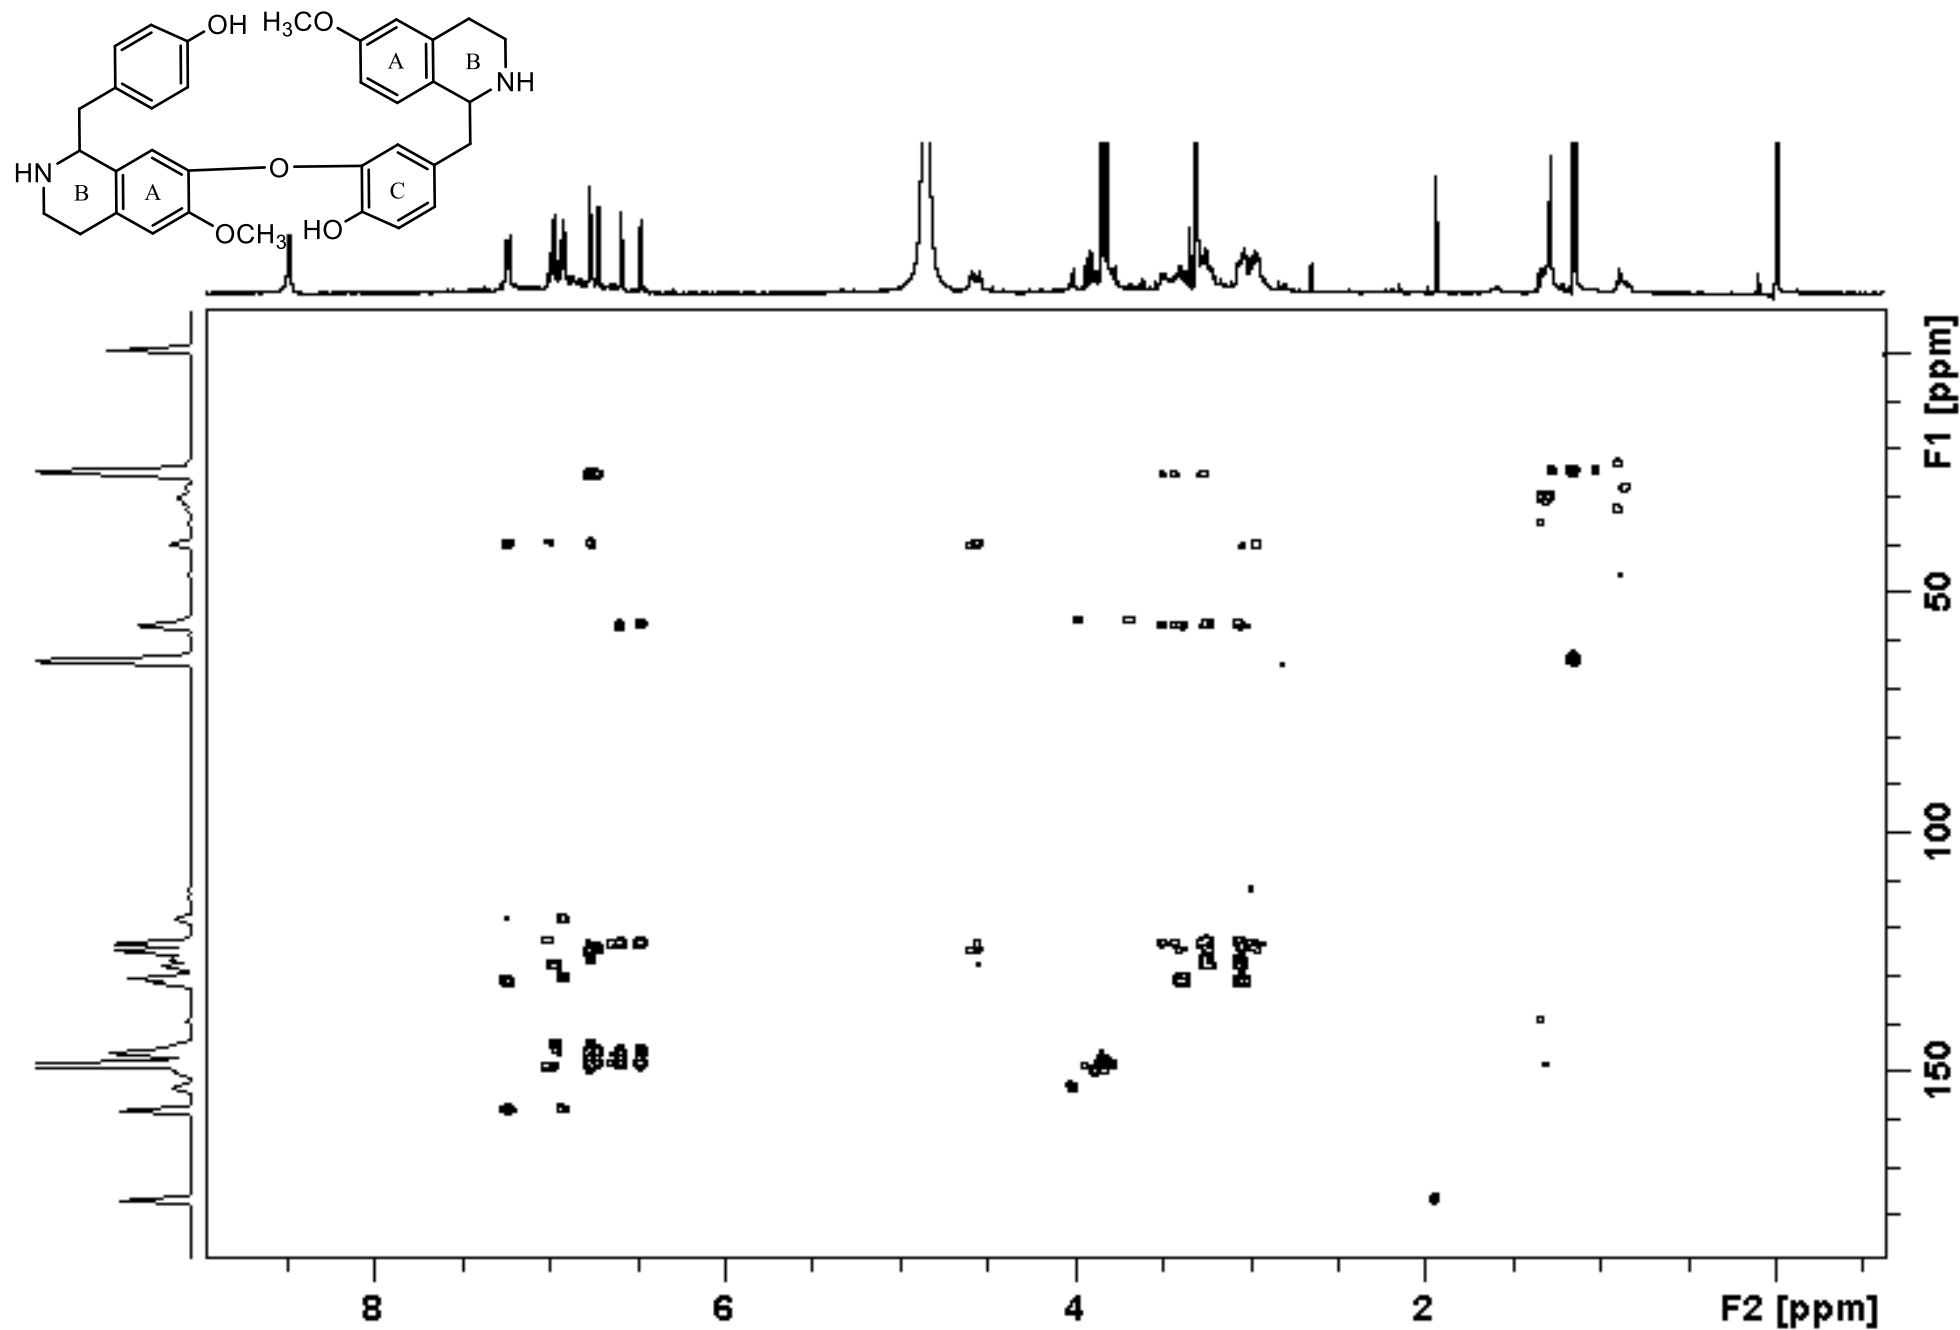

Figure S5: HMBC spectrum (125 MHz, CD<sub>3</sub>OD, TMS) of lindoldhamine isomer.

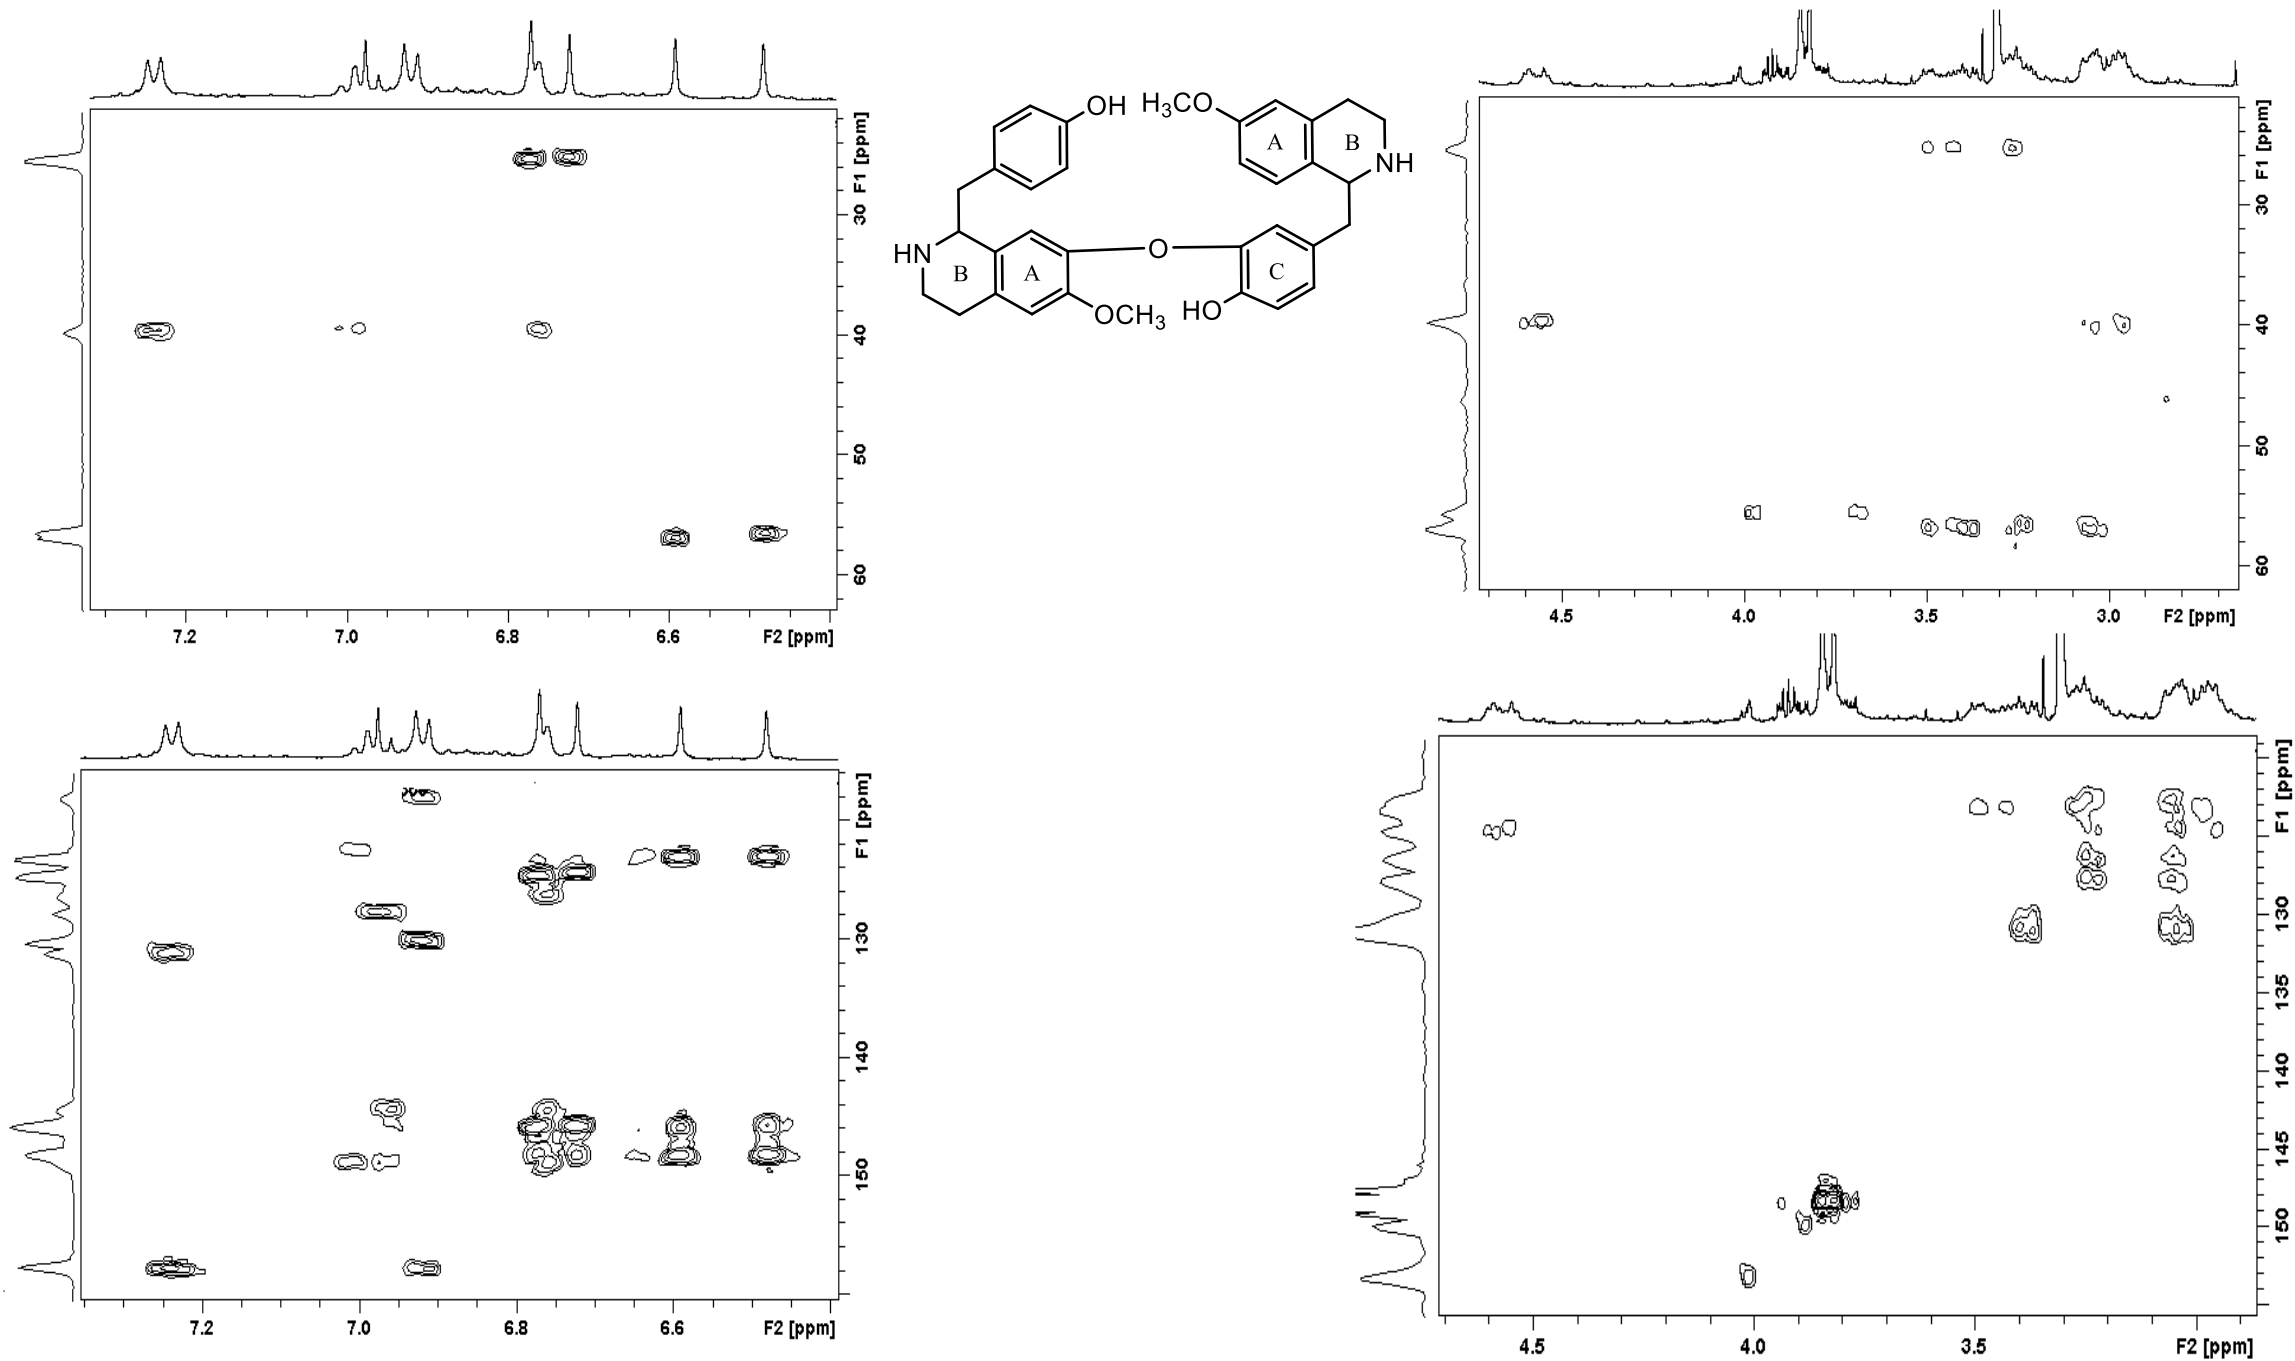

**Figure S6: Expanded regions of the HMBC spectrum (125 MHz, CD<sub>3</sub>OD, TMS) of lindoldhamine isomer.**

**Table S1: NMR chemical shifts of lindoldhamine isomer.** The experiments were realized in CD<sub>3</sub>OD at magnetic field strength of 11.7 T; 500 MHz for <sup>1</sup>H NMR.

s: singlet; m: multiplet; dd: doublet of doublets; ddd: doublet of doublets of doublets.

| Position            | <sup>1</sup> H                                          | <sup>13</sup> C                         | HMBC, ppm <sup>a</sup>                |
|---------------------|---------------------------------------------------------|-----------------------------------------|---------------------------------------|
|                     | δ <sub>H</sub> , ppm (multiplicity; number of H; J, Hz) | δ <sub>C</sub> (HSQC), ppm <sup>a</sup> |                                       |
| 1                   | 4.59 (t; 1H; 7.1 Hz)                                    | 56.1                                    | C-15; C-4a                            |
| 3                   | 3.40 (m; 2H)                                            | 39.3                                    | C-4; C-1; C-8a                        |
| 4                   | 3.03 and 3.07 (m; 2H)                                   | 24.9                                    | C-3; C-1                              |
| 4a                  | -                                                       | 124.5                                   | -                                     |
| 5                   | 6.77 (s; 1H)                                            | 111.4                                   | C-4; C-8; C-8a; C-4a; C-7; C-6        |
| 6                   | -                                                       | 148.2                                   | -                                     |
| 6-OCH <sub>3</sub>  | 3.82 (s; 3H)                                            | 55.2                                    | C-7; C-6                              |
| 7                   | -                                                       | 145.6                                   | -                                     |
| 8                   | 6.48 (s; 1H)                                            | 113.1                                   | C-6 OCH <sub>3</sub> ; C-8a; C-7; C-6 |
| 8a                  | -                                                       | 123.1                                   | -                                     |
| 9                   | -                                                       | 131.1                                   | -                                     |
| 10                  | 7.25 (d; 1H; 8.5 Hz)                                    | 130.6                                   | C-15; C-11; C-9; C-12; C-14           |
| 11                  | 6.93 (d; 1H; 8.5 Hz)                                    | 117.5                                   | C-13; C-9; C-12                       |
| 12                  | -                                                       | 157.8                                   | -                                     |
| 13                  | 6.93 (d; 1H; 8.5 Hz)                                    | 117.5                                   | C-11; C-9; C-12                       |
| 14                  | 7.25 (d; 1H; 8.5 Hz)                                    | 126.0                                   | C-15; C-13; C-10; C-9; C-12           |
| 15                  | 3.05 (m; 1H)                                            | 39.3                                    | C-1; C-8a; C-14; C-10; C-9            |
|                     | 3.36 (m; 1H)                                            |                                         |                                       |
| 1'                  | 4.55 (t; 1H; 7.1 Hz)                                    | 56.4                                    | C-15'; C-4a'                          |
| 3'                  | 3.49 (m; 2H)                                            | 39.4                                    | C-4'; C-1'; C-8a'                     |
| 4'                  | 2.98 and 2.99 (m; 2H)                                   | 24.8                                    | C-3'; C-1'; C-8a'; C-4a'              |
| 4a'                 | -                                                       | 124.3                                   | -                                     |
| 5'                  | 6.72 (s; 1H)                                            | 111.3                                   | C-4'; C-8'; C-4a'; C-7'; C-6'         |
| 6'                  | -                                                       | 148.2                                   | -                                     |
| 6'-OCH <sub>3</sub> | 3.84 (s; 3H)                                            | 55.1                                    | C-7'; C-6'                            |
| 7'                  | -                                                       | 145.7                                   | -                                     |
| 8'                  | 6.59 (s; 1H)                                            | 112.9                                   | C-8a'; C-1'; C-7'; C-6'               |
| 8a'                 | -                                                       | 123.0                                   | -                                     |
| 9'                  | -                                                       | 127.7                                   | -                                     |
| 10'                 | 6.76 (s; 1H)                                            | 121.9                                   | C-15'; C-14'; C-12'                   |
| 11'                 | -                                                       | 144.5                                   | -                                     |
| 12'                 | -                                                       | 148.8                                   | -                                     |
| 13'                 | 6.98 (d; 1H; 8.5 Hz)                                    | 117.6                                   | C-15'; C-9'; C-11'; C-12'             |
| 14'                 | 6.99 (dd; 1H; 8.5 and 2.0 Hz)                           | 126.0                                   | C-15'; C-10'; C-12'                   |
| 15'                 | 3.05 (m; 1H)                                            | 39.3                                    | C-1'; C-10'; C-8a'; C-14'; C-9'       |
|                     | 3.25 (m; 1H)                                            |                                         |                                       |

<sup>a</sup> <sup>13</sup>C NMR signals were assigned using the HSQC and HMBC data.

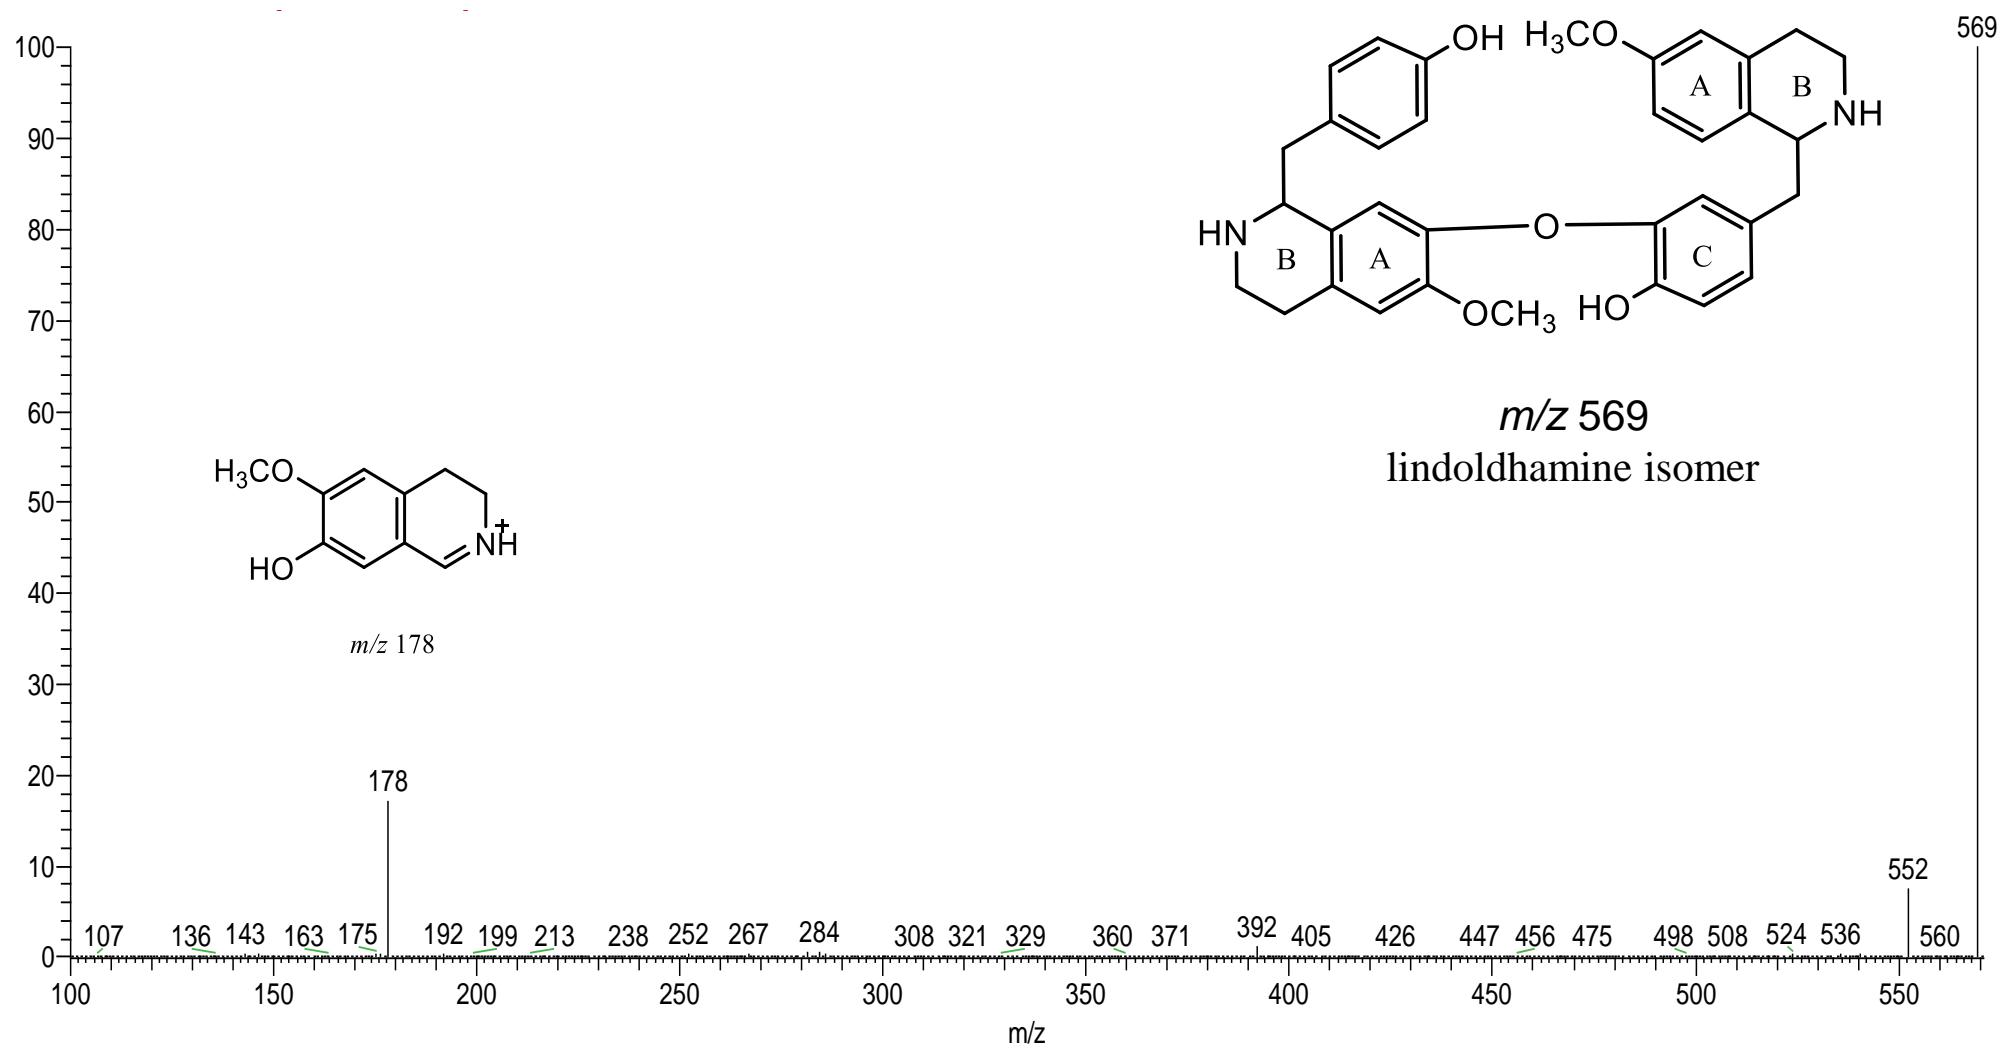

**Figure S7: Mass spectrum (MS/MS) of lindoldhamine isomer with chemical structure and identification of the main fragment ions.**



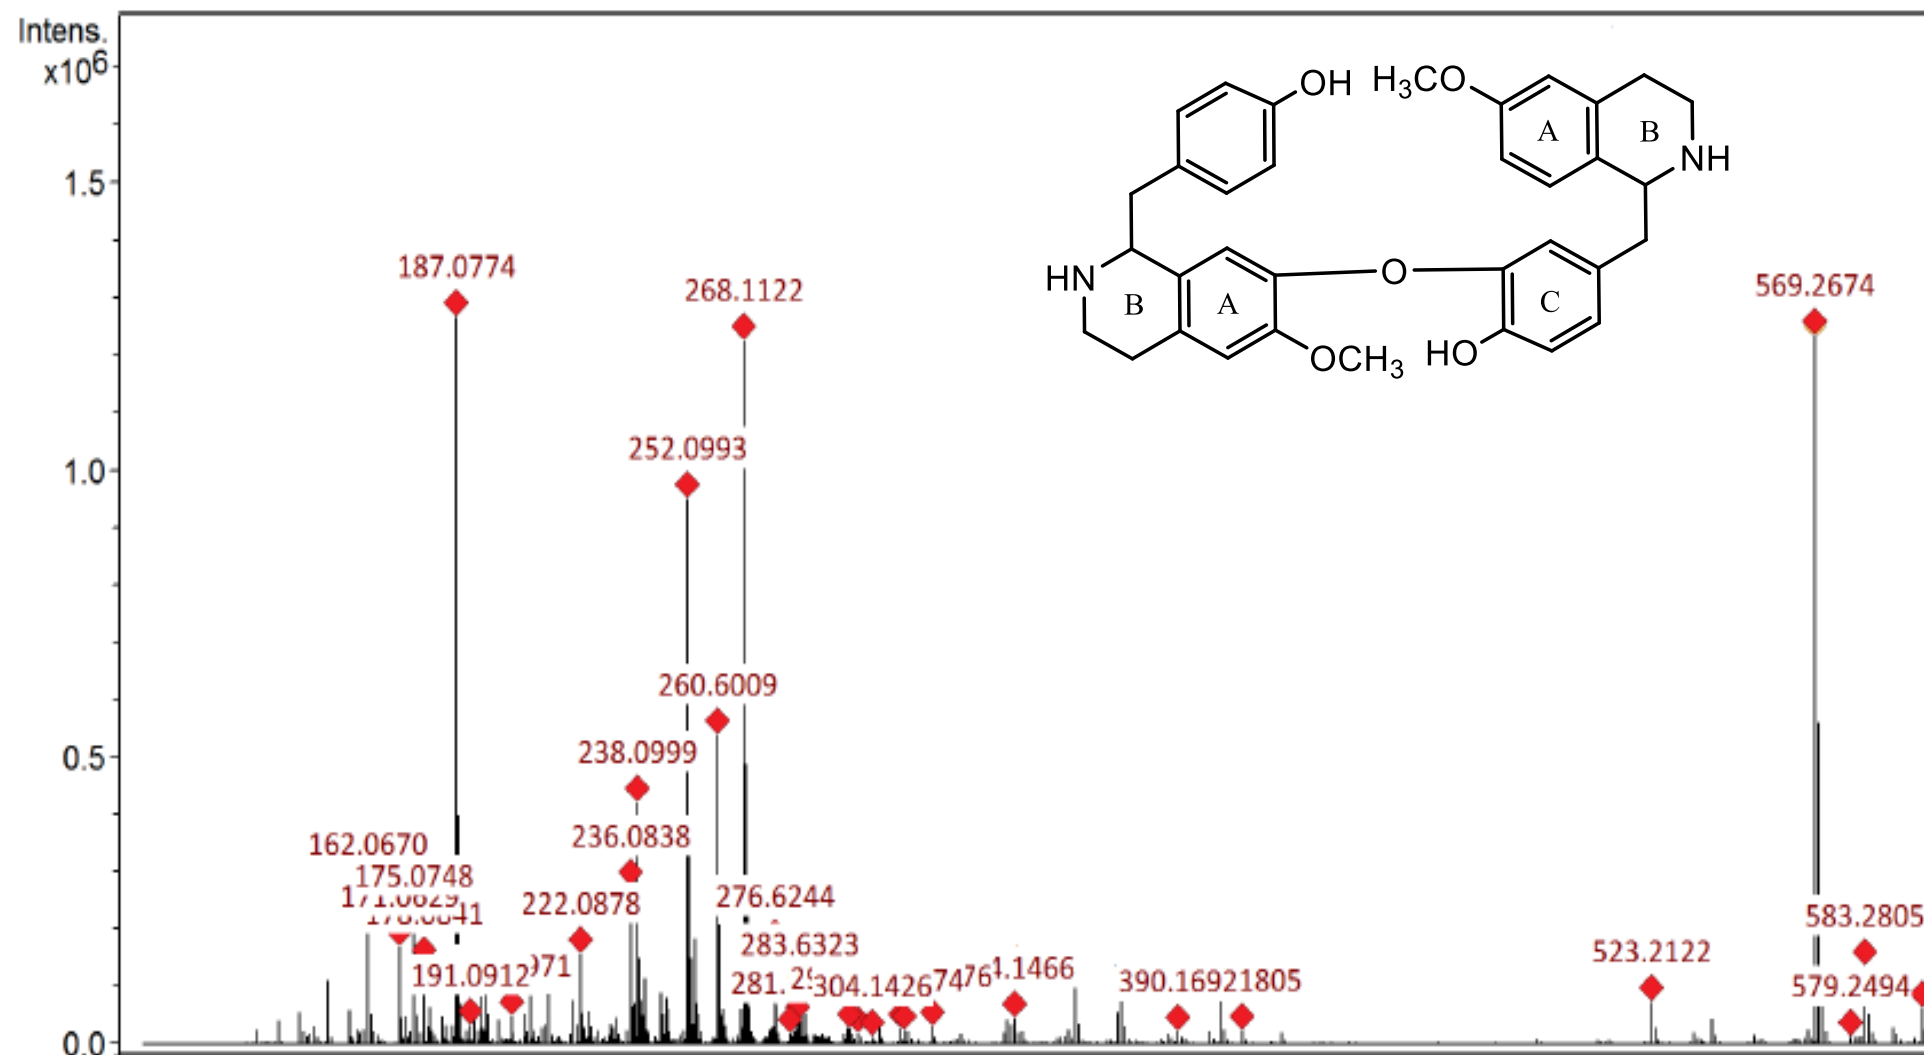

**Figure S8: High resolution mass-spectrum of lindoldhamine isomer with chemical structure.**

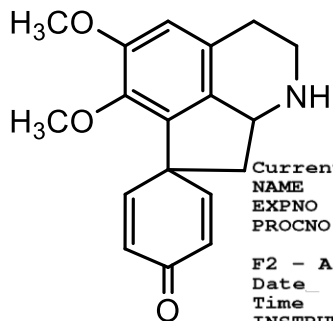

Current Data Parameters

NAME  
EXPNO 1  
PROCNO 1

F2 - Acquisition Parameters

Date\_  
Time 10.05 h  
INSTRUM spect  
PROBHD Z119470\_0223 (  
PULPROG zg30  
TD 65536  
SOLVENT MeOD  
NS 32  
DS 2  
SWH 10000.000 Hz  
FIDRES 0.305176 Hz  
AQ 3.2767999 sec  
RG 165.8  
DW 50.000 usec  
DE 10.00 usec  
TE 298.2 K  
D1 1.00000000 sec  
TD0 1  
SFO1 500.1330883 MHz  
NUC1 1H  
P0 3.43 usec  
P1 10.30 usec  
PLW1 20.32299995 W

F2 - Processing parameters

SI 131072  
SF 500.1300116 MHz  
WDW EM  
SSB 0  
LB 0.30 Hz  
GB 0  
PC 1.00

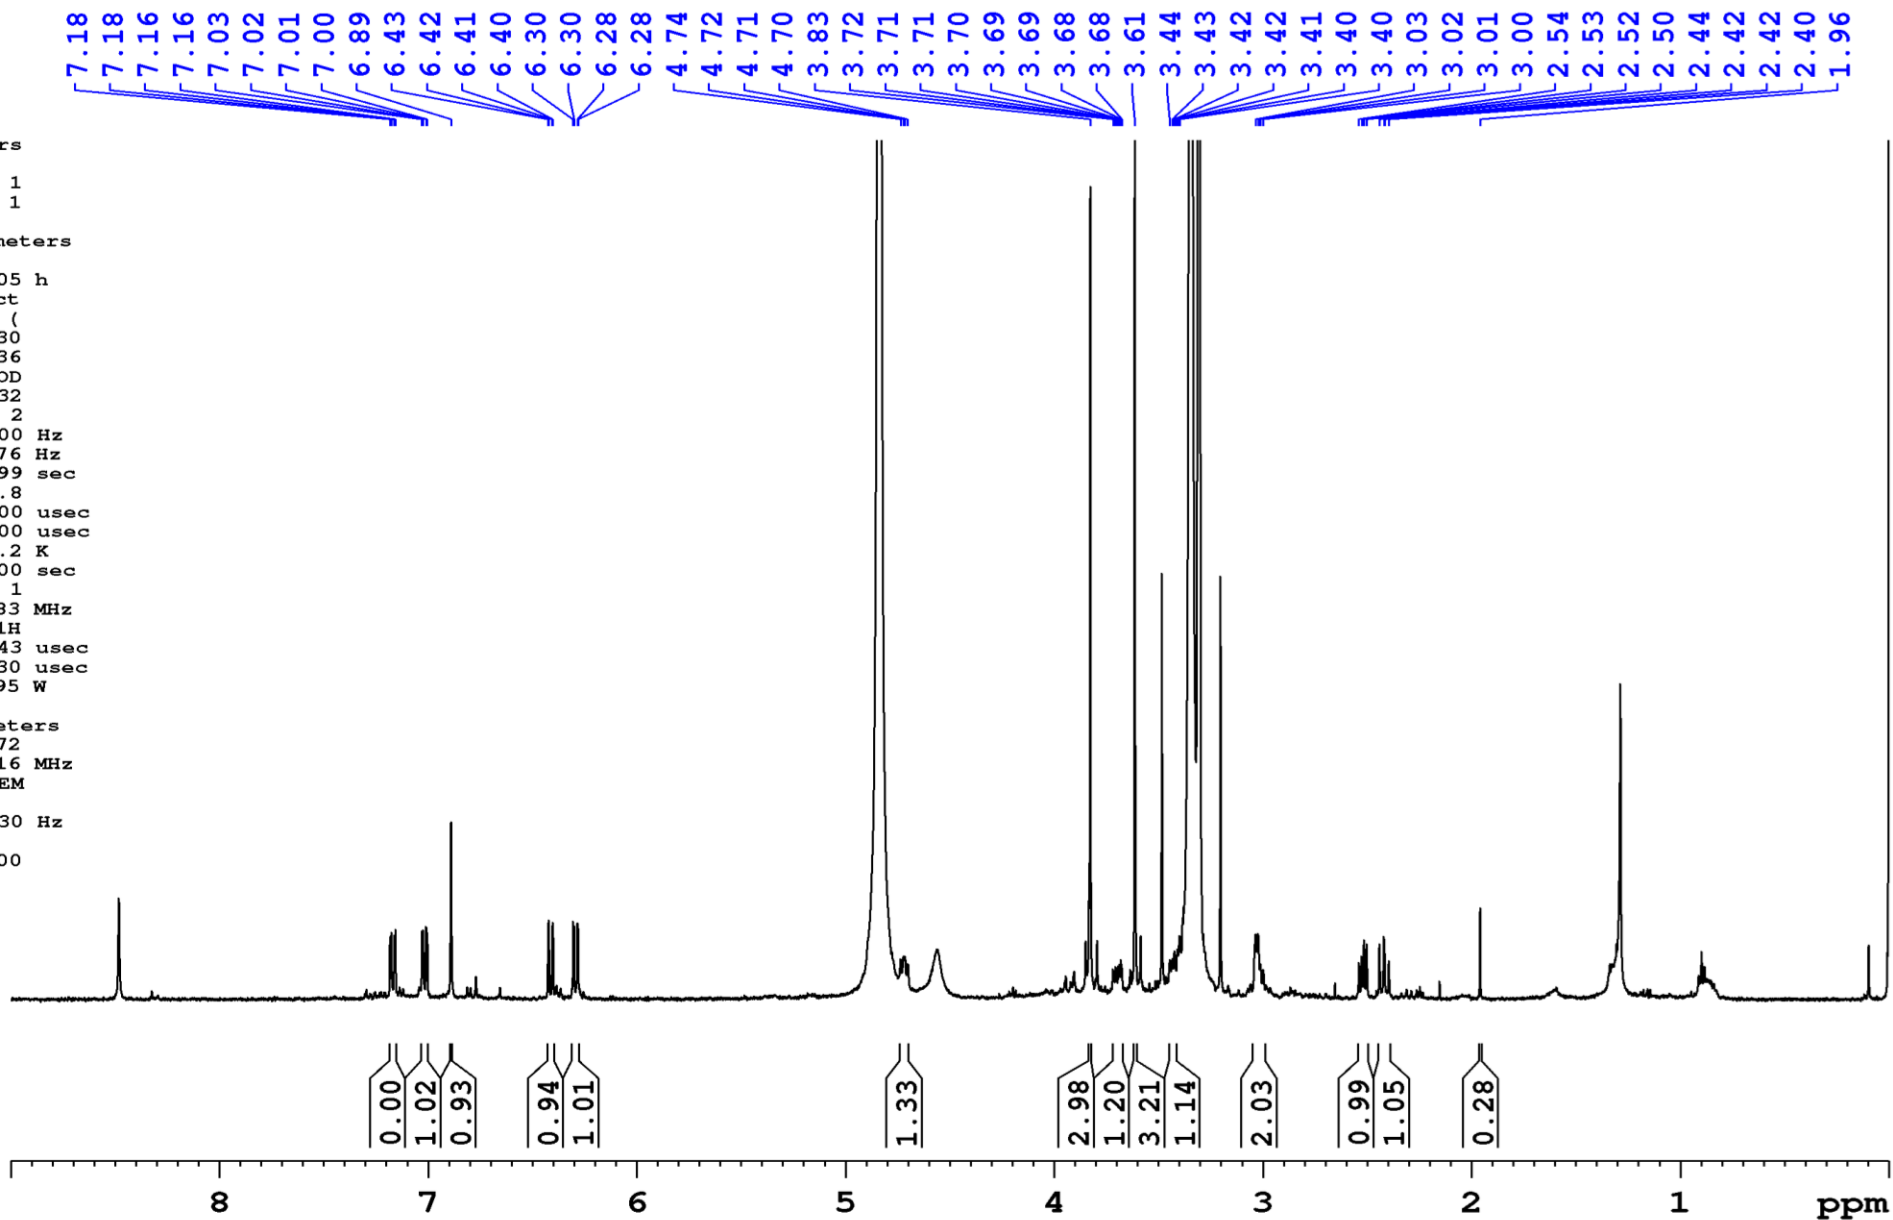

Figure S9: <sup>1</sup>H NMR spectrum (500 MHz, CD<sub>3</sub>OD, TMS) of stepharine.

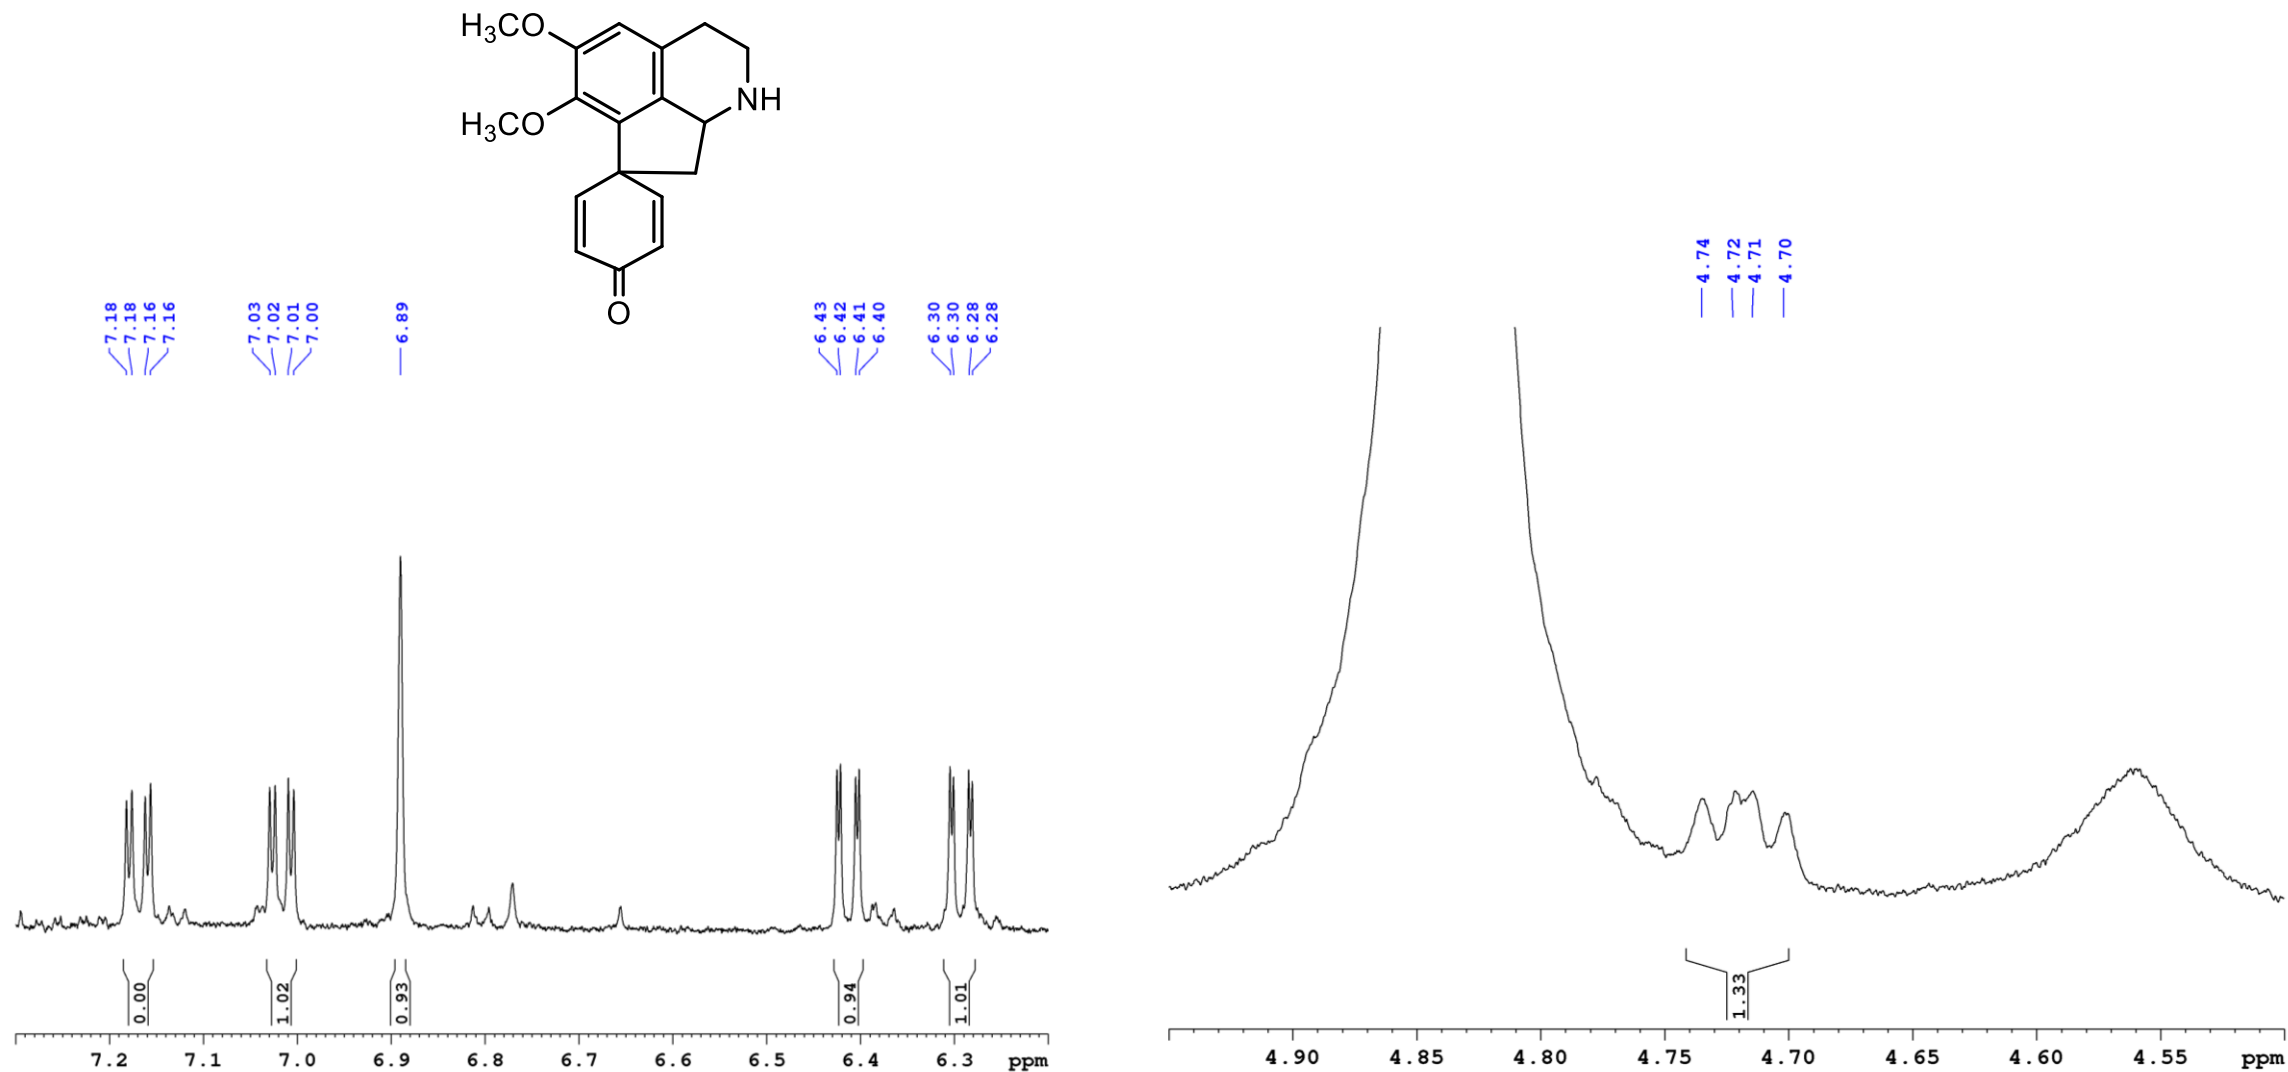

**Figure S10: Expanded regions of the  $^1\text{H}$  NMR spectrum (500 MHz,  $\text{CD}_3\text{OD}$ , TMS) of stepharine.**

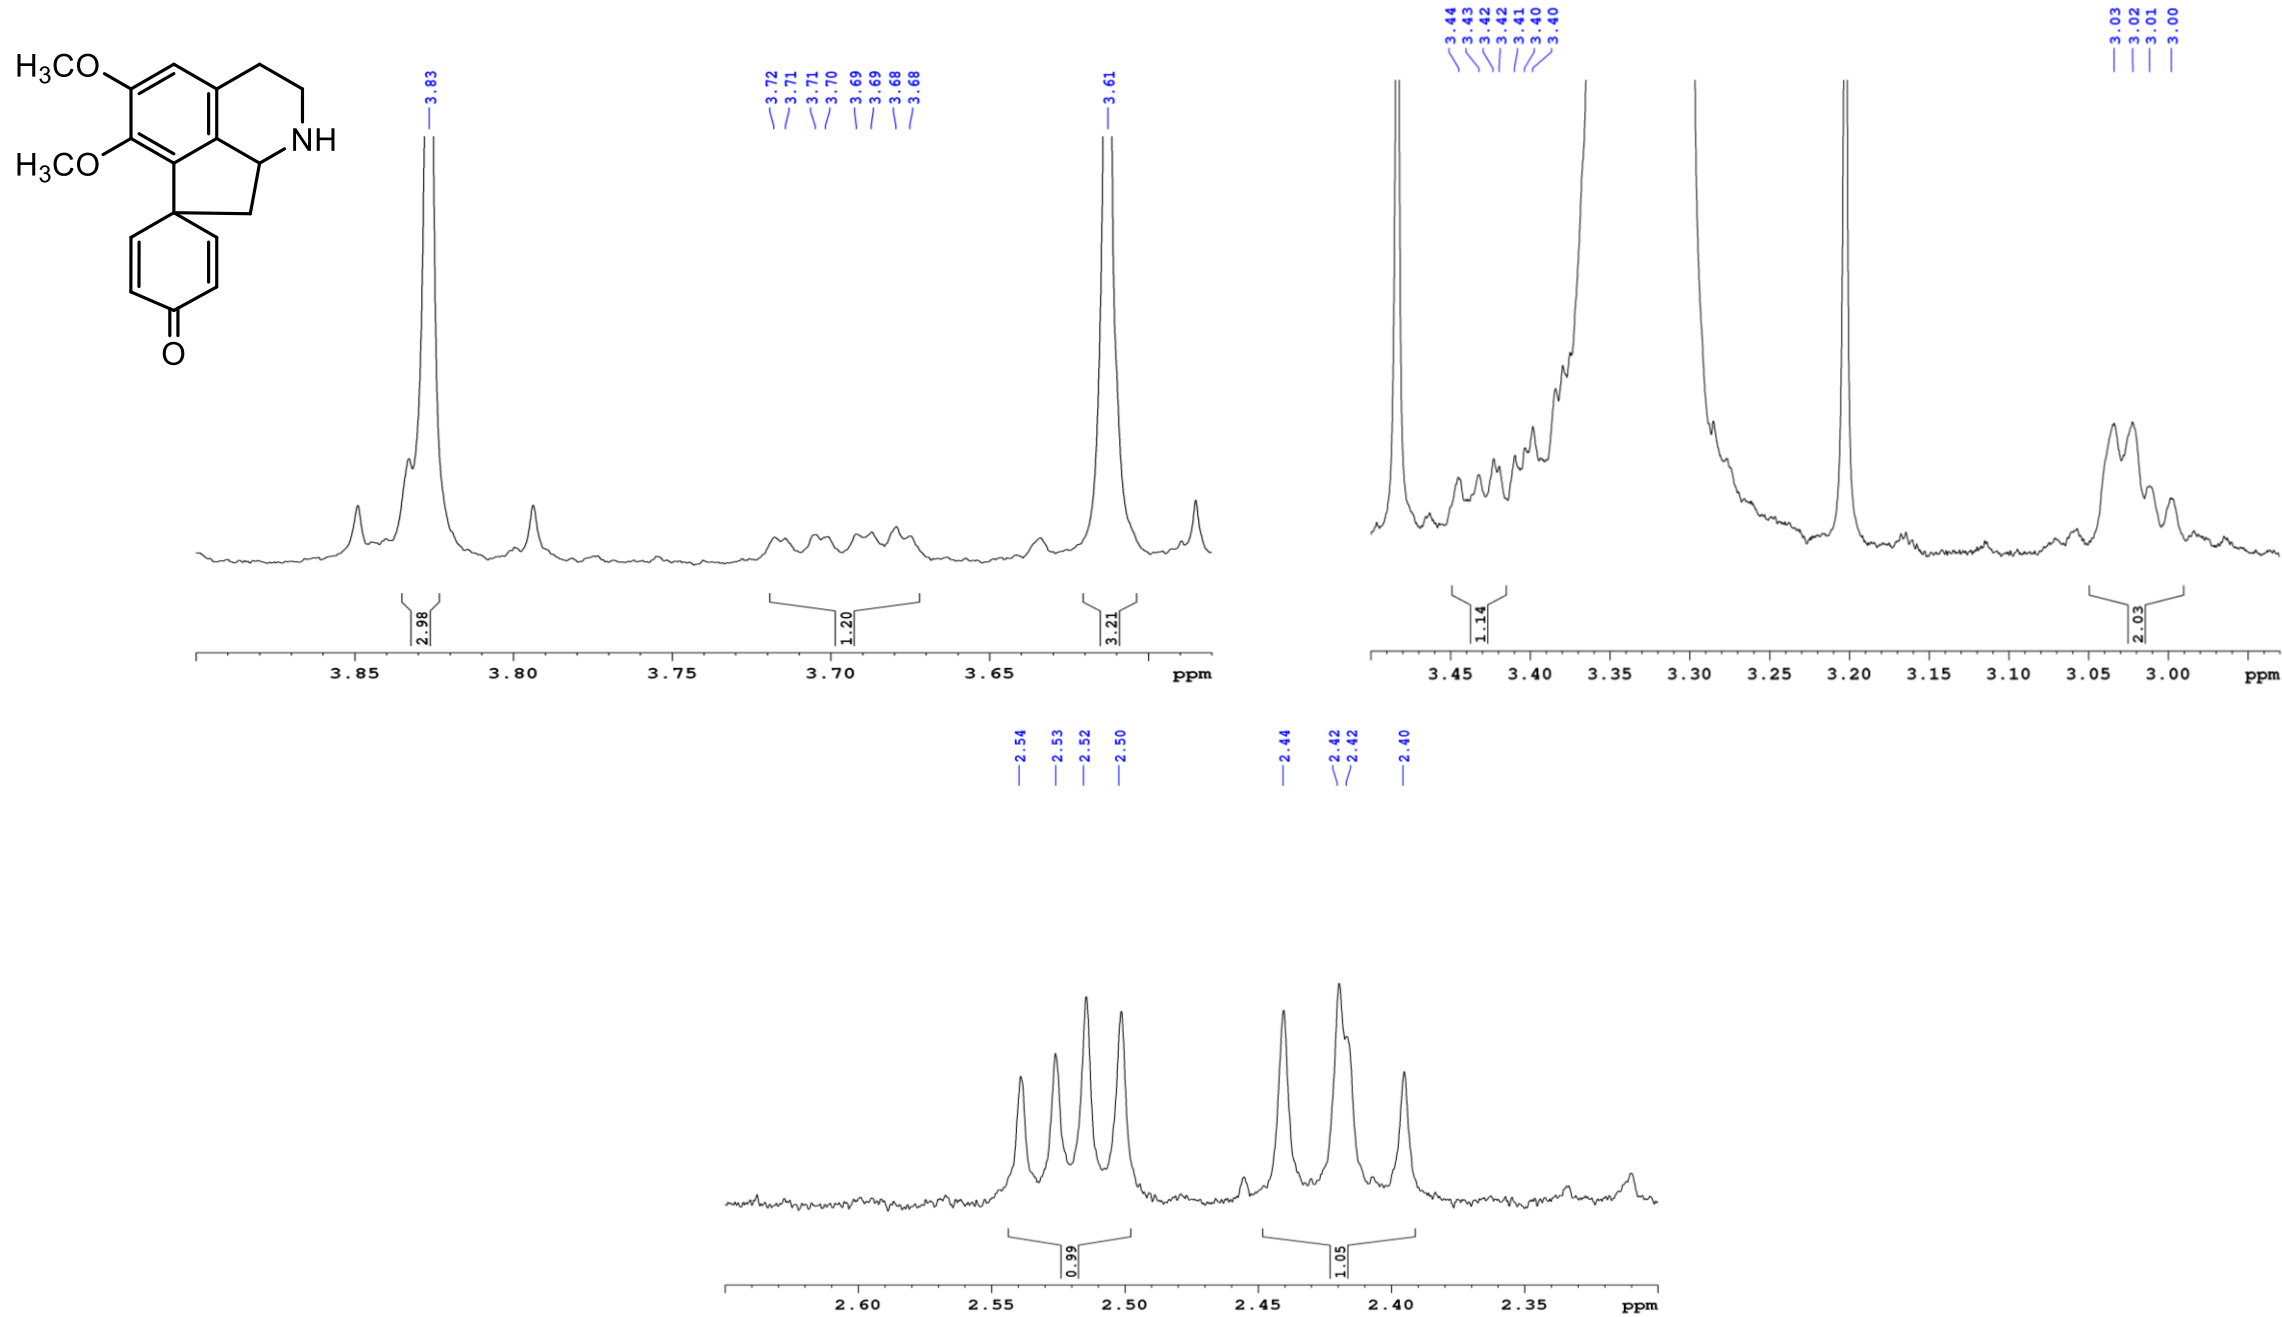

**Figure S11: Expanded regions of the  $^1\text{H}$  NMR spectrum (500 MHz,  $\text{CD}_3\text{OD}$ , TMS) of stepharine.**

```

Current Data Parameters
NAME
EXPNO 200
PROCNO 1

F2 - Acquisition Parameters
Date_ 18.13 h
INSTRUM spect
PROBHD Z119470_0223 (
PULPROG hsqcetgpsisp2.2
TD 2048
SOLVENT MeOD
NS 64
DS 16
SWH 6421.233 Hz
FIDRES 3.135368 Hz
AQ 0.1594709 sec
RG 187.25
DE 77.867 usec
TE 298.2 K
CNST2 145.0000000
CNST17 -0.5000000
D0 0.00000300 sec
D1 1.00000000 sec
D4 0.00172414 sec
D11 0.03000000 sec
D16 0.00020000 sec
D24 0.00089000 sec
IN0 0.00001850 sec
TDav 1
SFO1 500.1322062 MHz
NUC1 1H
F1 9.40 usec
P2 18.80 usec
P28 1000.00 usec
PLW1 20.32299995 W
SFO2 125.7703643 MHz
NUC2 13C
CPDPRG[2] garp
F3 10.00 usec
P14 500.00 usec
P24 2000.00 usec
PCPD2 70.00 usec
PLW0 0 W
PLW2 88.00000000 W
PLW12 1.78668594 W
SPNAM[3] Crp60,0.5,20.1
SPOAL3 0.500
SPOFFS3 0 Hz
SPW3 13.444999969 W
SPNAM[7] Crp60comp.4
SPOAL7 0.500
SPOFFS7 0 Hz
SPW7 13.444999969 W
GPNAM[1] SMSQ10.100
GPZ1 80.00 %
GPNAM[2] SMSQ10.100
GPZ2 20.10 %
GPNAM[3] SMSQ10.100
GPZ3 11.00 %
GPNAM[4] SMSQ10.100
GPZ4 -5.00 %
P16 1000.00 usec
P19 600.00 usec

F1 - Acquisition parameters
TD 256
SFO1 125.7704 MHz
FIDRES 211.148651 Hz
SW 214.892 ppm
FnMODE Echo-Antiecho

F2 - Processing parameters
SI 4096
SF 500.1300093 MHz
WDW QSINE
SSB 2
LB 0 Hz
GB 0
PC 1.40

F1 - Processing parameters
SI 1024
MC2 echo-antiecho
SF 125.7577936 MHz
WDW QSINE
SSB 2
LB 0 Hz
GB 0

```

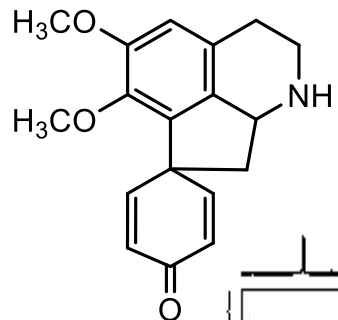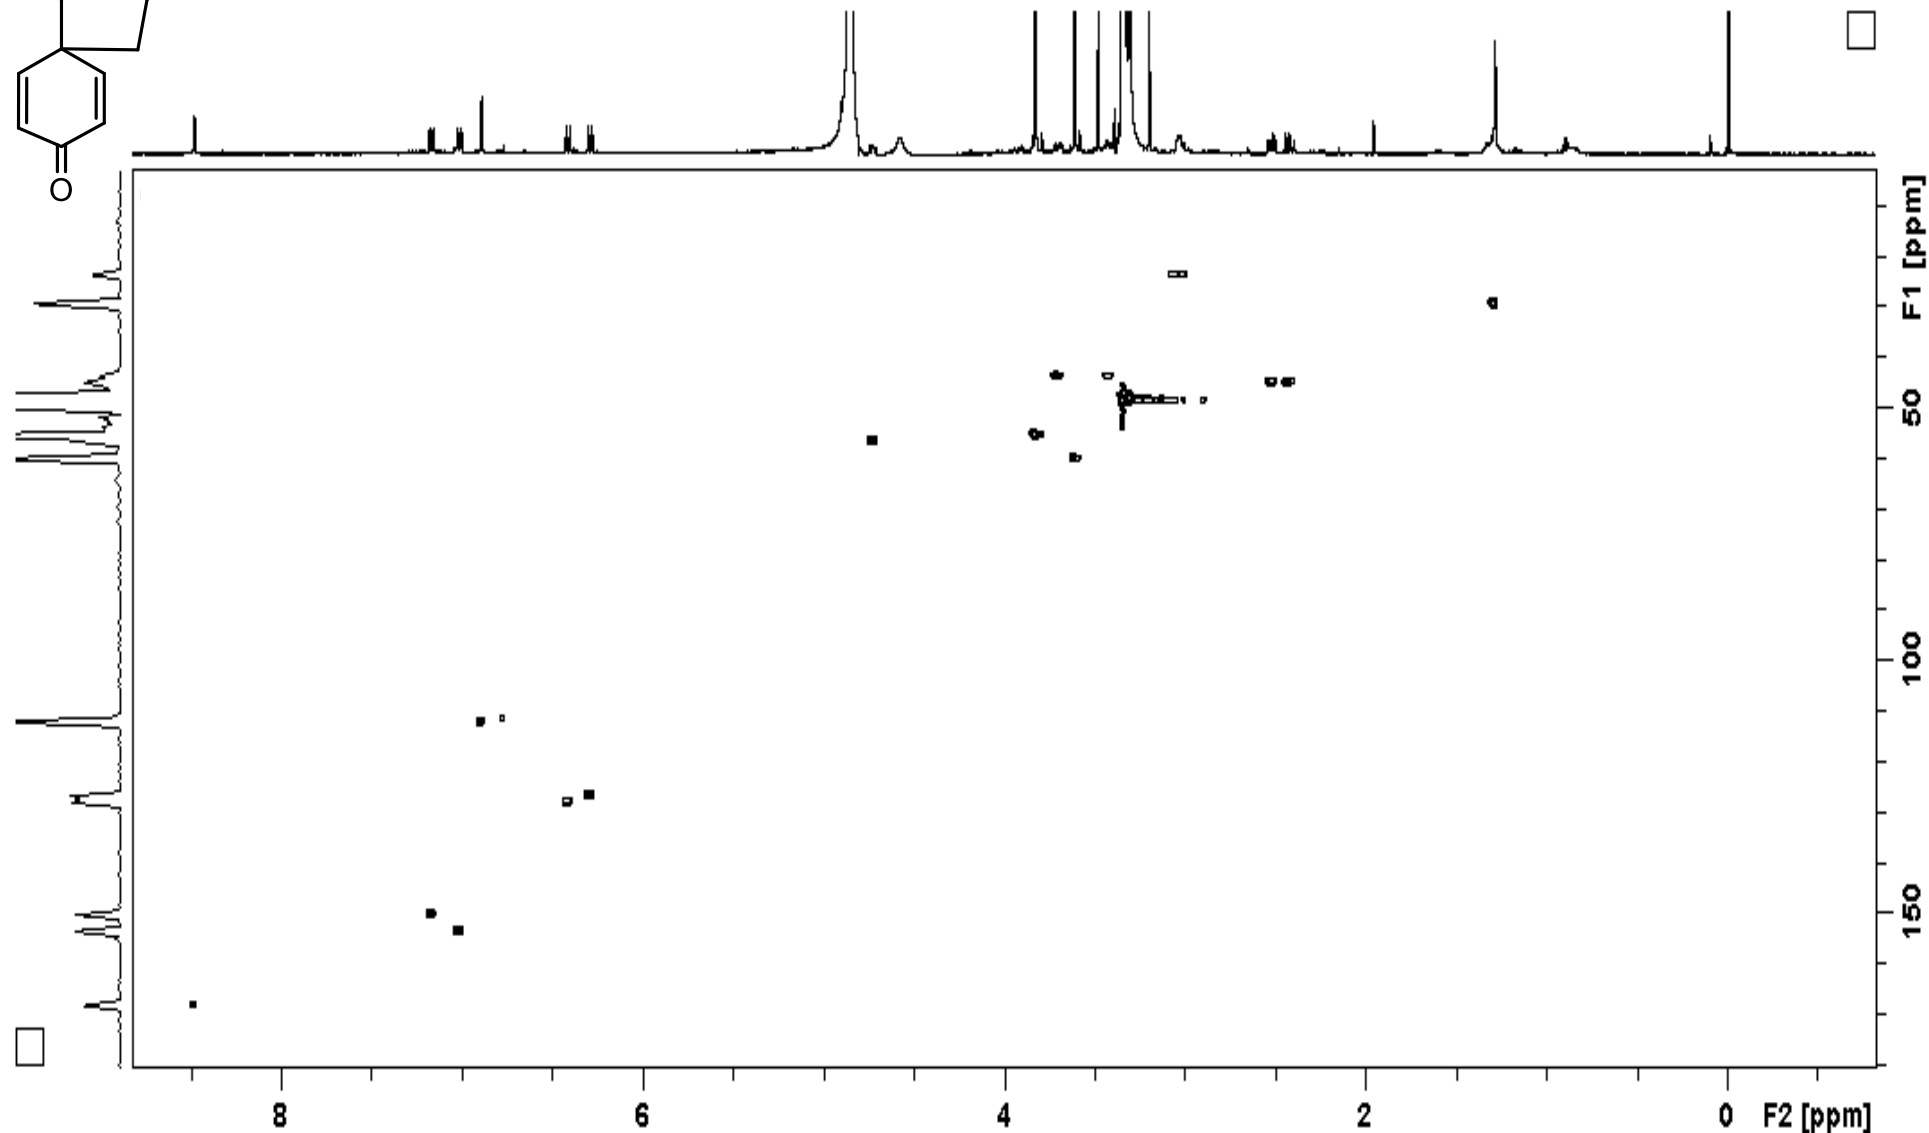

Figure S12: HSQC spectrum (125 MHz,  $\text{CD}_3\text{OD}$ , TMS) of stepharine.

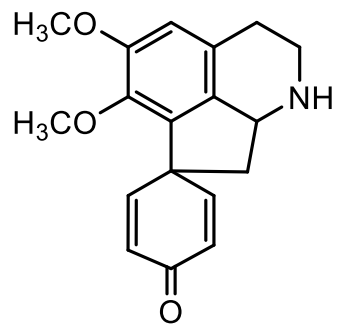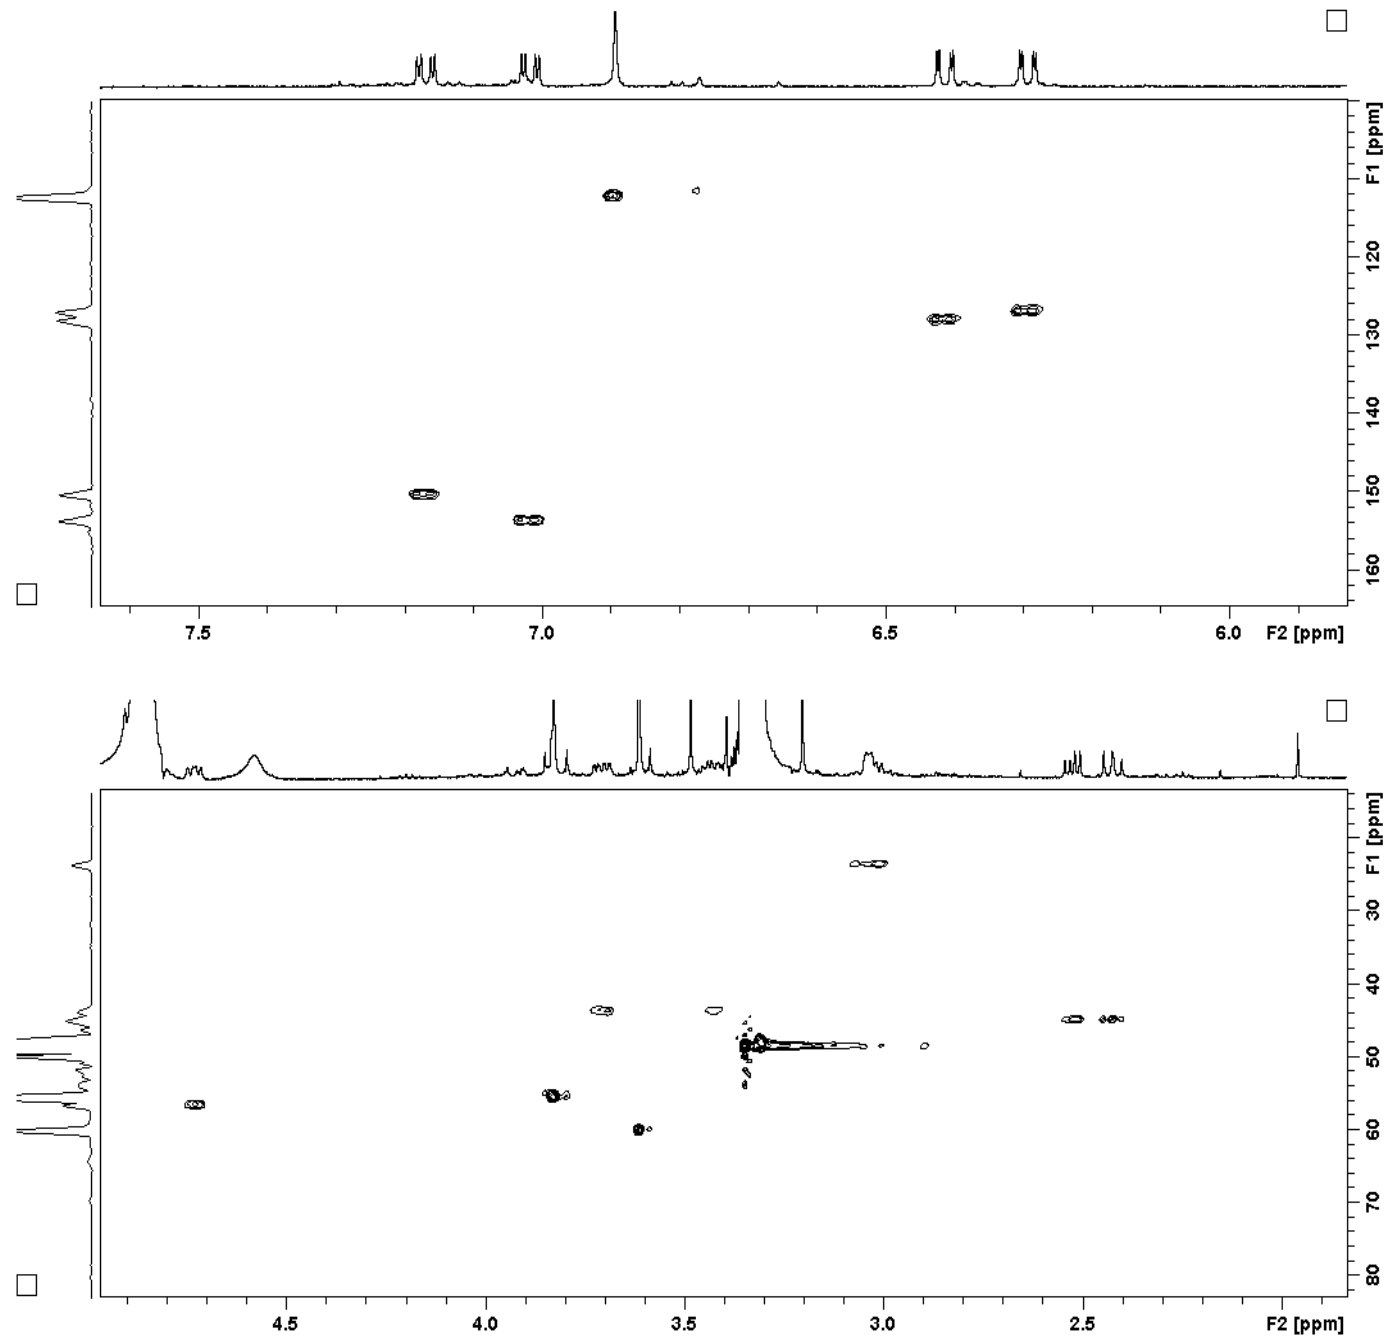

**Figure S13: Expanded regions of the HSQC spectrum (125 MHz,  $\text{CD}_3\text{OD}$ , TMS) of stepharine.**

Current Data Parameters  
NAME  
EXPNO 300  
PROCNO 1

F2 - Acquisition Parameters  
Date  
Time 23.39 h  
INSTRUM spect  
PROBHD z119470\_0223 {  
PULPROG hmbcgp1pndqf  
TD 2048  
SOLVENT MeOD  
NS 186  
DS 16  
SWH 6421.233 Hz  
FIDRES 3.135368 Hz  
AQ 0.1594709 sec  
RG 187.25  
DW 77.867 usec  
DE 10.00 usec  
TE 298.2 K  
CNST2 145.0000000  
CNST13 8.0000000  
D0 0.00000300 sec  
D1 1.00000000 sec  
D2 0.00344828 sec  
D6 0.06250000 sec  
D16 0.00020000 sec  
IN0 0.00001660 sec  
TDav 1  
SFO1 500.1322062 MHz  
NUC1 1H  
P1 9.40 usec  
P2 18.80 usec  
PLW1 20.32299995 W  
SFO2 125.7716219 MHz  
NUC2 13C  
P3 10.00 usec  
PLW2 88.00000000 W  
GPNAM[1] SMSQ10.100  
GPZ1 50.00 %  
GPNAM[2] SMSQ10.100  
GPZ2 30.00 %  
GPNAM[3] SMSQ10.100  
GPZ3 40.10 %  
P16 1000.00 usec

F1 - Acquisition parameters  
TD 240  
SFO1 125.7716 MHz  
FIDRES 251.004013 Hz  
SW 239.486 ppm  
FnMODE QF

F2 - Processing parameters  
SI 4096  
SF 500.1300128 MHz  
WDW SINE  
SSB 0  
LB 0 Hz  
GB 0  
PC 1.40

F1 - Processing parameters  
SI 1024  
MC2 QF  
SF 125.7578149 MHz  
WDW SINE  
SSB 0  
LB 0 Hz  
GB 0

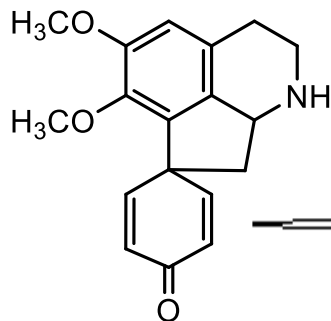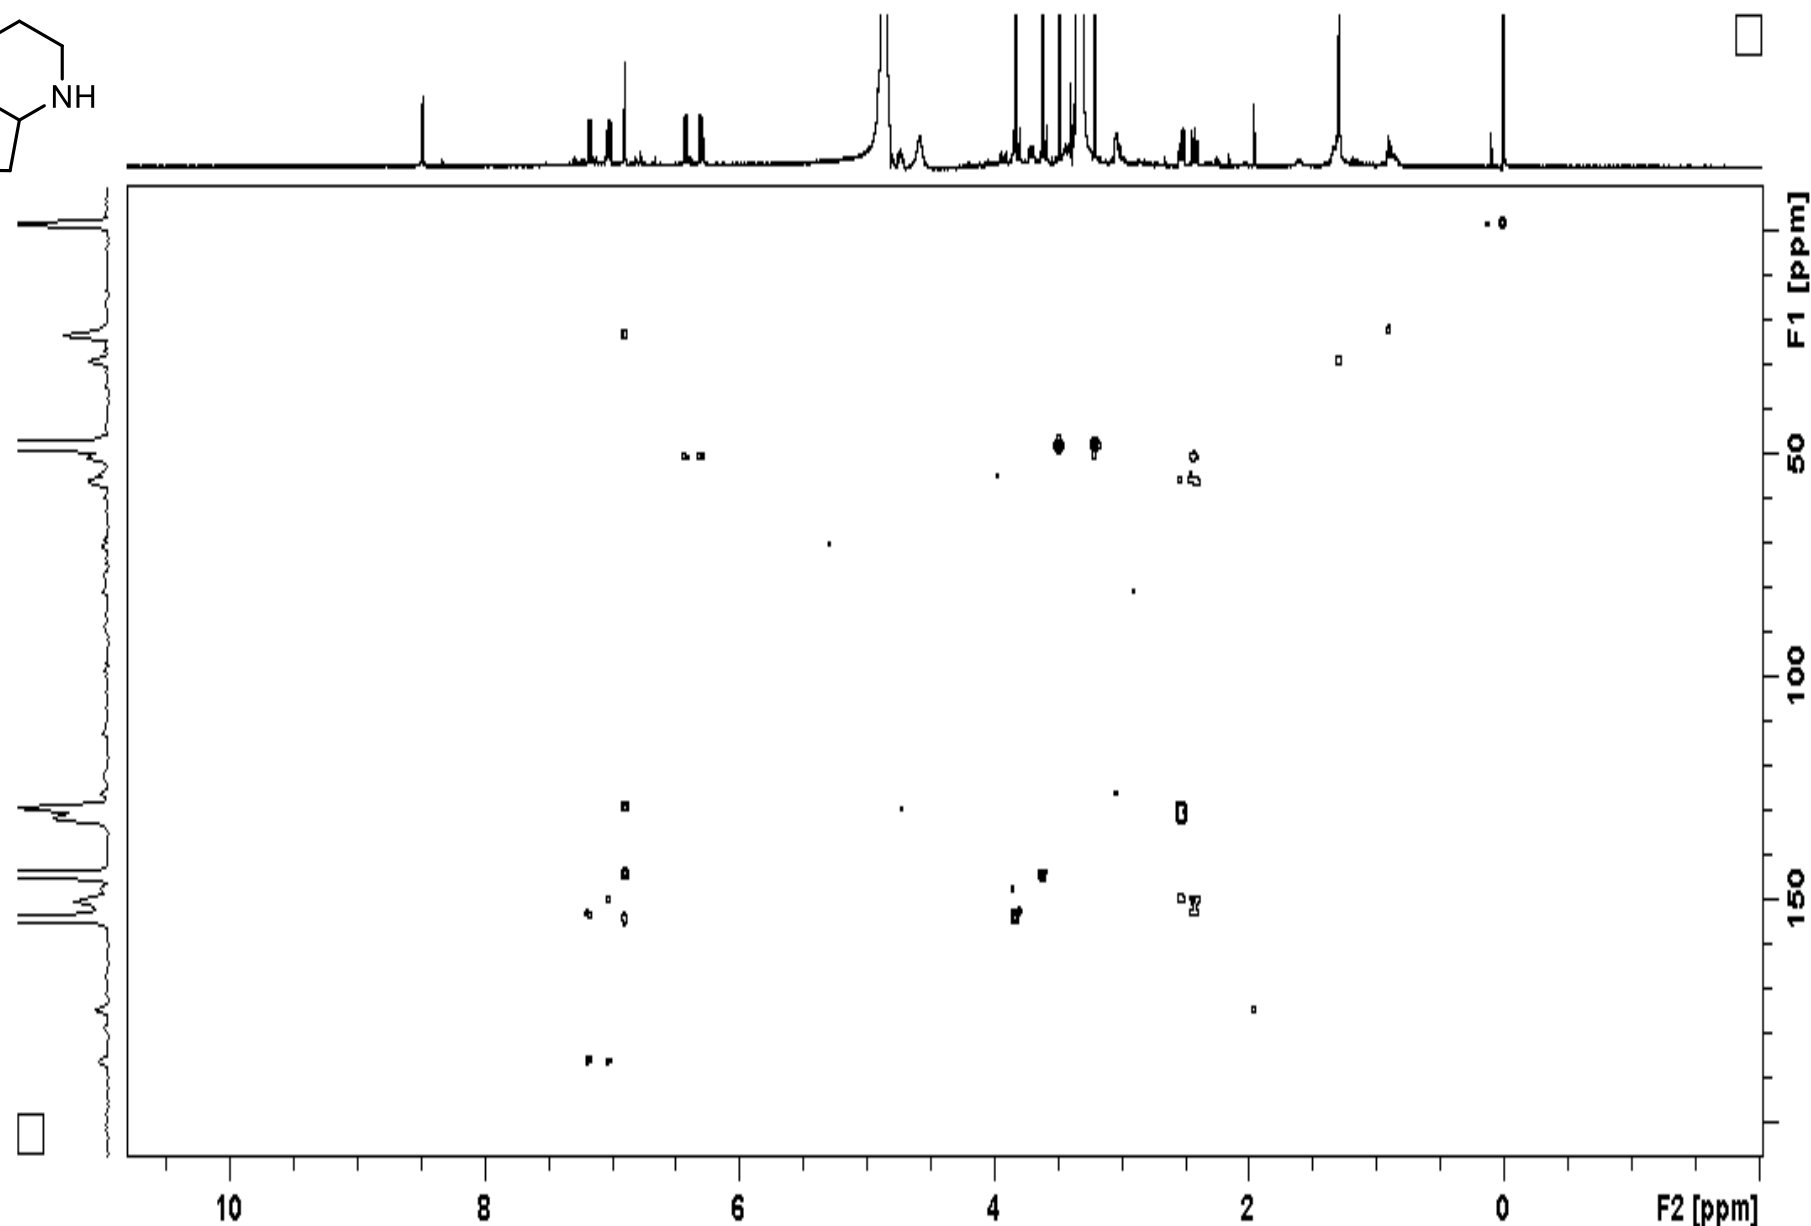

Figure S14: HMBC spectrum (125 MHz, CD<sub>3</sub>OD, TMS) of stepharine.

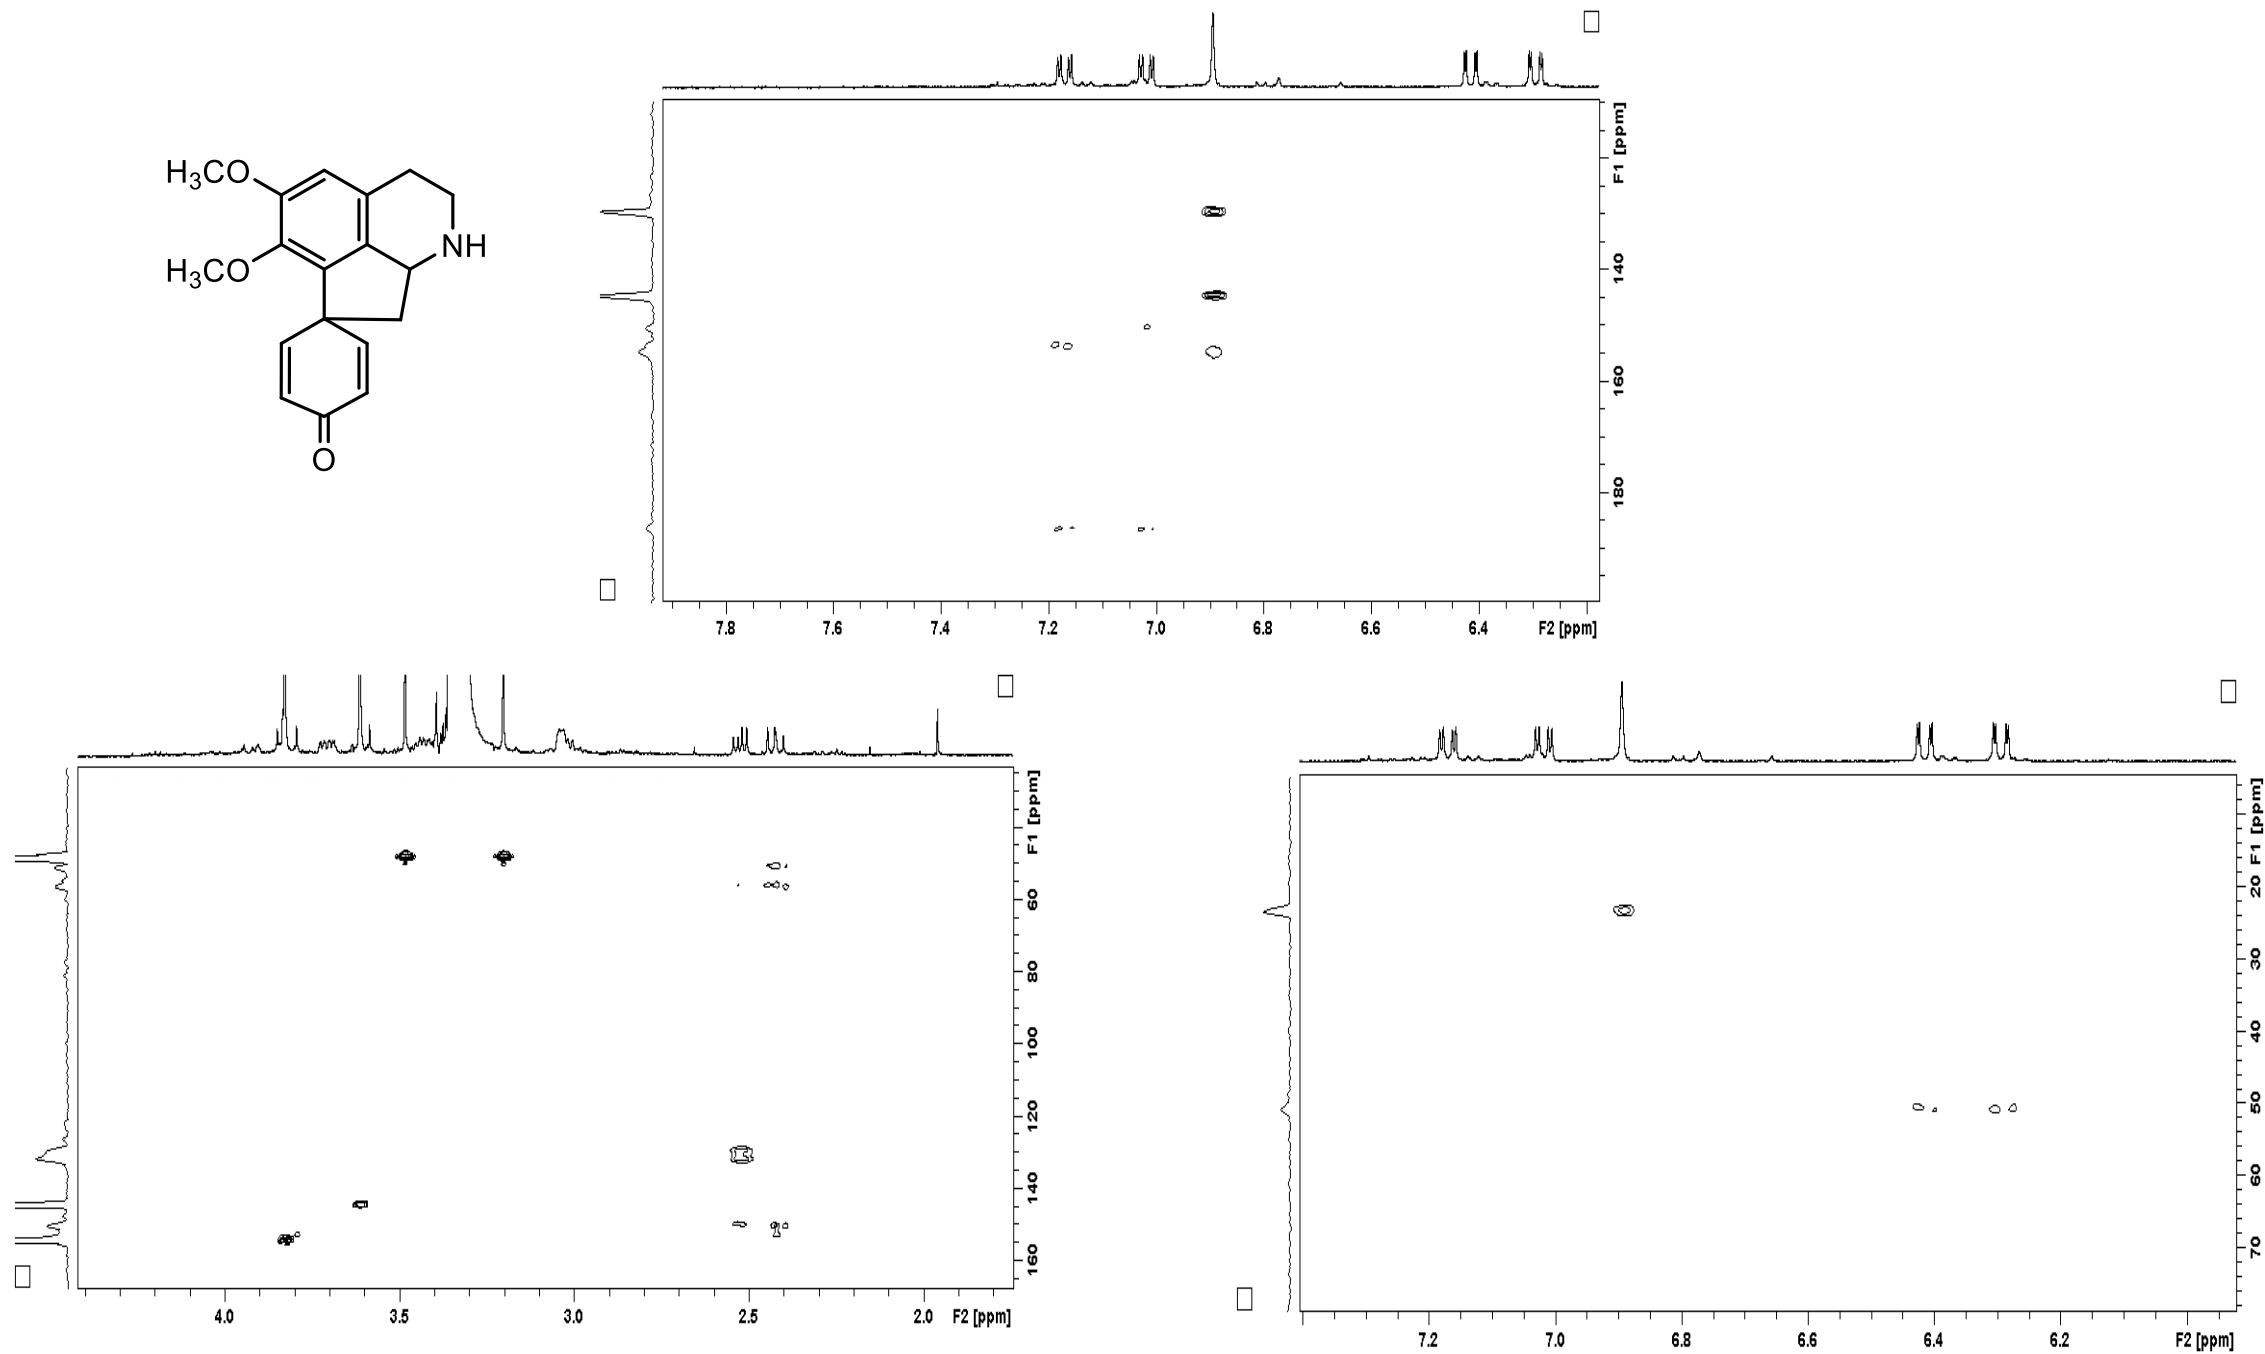

**Figure S15: Expanded regions of the HMBC spectrum (125 MHz, CD<sub>3</sub>OD, TMS) of stepharine.**



**Table S2: NMR chemical shifts of stepharine.** The experiments were realized in CD<sub>3</sub>OD at magnetic field strength of 11.7 T; 500 MHz for <sup>1</sup>H NMR.

s: singlet; m: multiplet; dd: doublet of doublets; ddd: doublet of doublets of doublets.

| Position            | <sup>1</sup> H                                                | <sup>13</sup> C                         |                                      |
|---------------------|---------------------------------------------------------------|-----------------------------------------|--------------------------------------|
|                     | δ <sub>H</sub> , ppm (multiplicity; number of H; J, Hz)       | δ <sub>C</sub> (HSQC), ppm <sup>a</sup> | HMBC, ppm <sup>a</sup>               |
| 1                   | -                                                             | 144.6                                   | -                                    |
| 1 -OCH <sub>3</sub> | 3.61 (s; 3H)                                                  | 59.9                                    | C-1                                  |
| 1a                  | -                                                             | 133.8                                   | -                                    |
| 2                   | -                                                             | 154.7                                   | -                                    |
| 2 -OCH <sub>3</sub> | 3.82 (s ; 3H)                                                 | 55.4                                    | C-2                                  |
| 3                   | 6.89 (s ; 1H)                                                 | 112.1                                   | C-1; C-2; C-3b; C-4                  |
| 3a                  | -                                                             | 131.5                                   | -                                    |
| 3b                  | -                                                             | 129.3                                   | -                                    |
| 4                   | 3.00 (m; 2H)                                                  | 23.5                                    | -                                    |
| 5                   | 3.44 (m; 1H)<br>3.69 (ddd; 1H; 13, 5.9, and 2.3 Hz)           | 43.7                                    | -                                    |
| 6 -NH               | 1.95 (s)                                                      | -                                       | -                                    |
| 6a                  | 4.72 (m; 1H)                                                  | 56.5                                    | C-1a                                 |
| 7                   | 2.42 (dd; 1H; 12 and 10.5 Hz)<br>2.52 (dd; 1H; 12 and 6.5 Hz) | 44.9                                    | C-1a; C-3b; C-6a;<br>C-7a; C-8; C-12 |
| 7a                  | -                                                             | 50.7                                    | -                                    |
| 8                   | 7.16 (dd; 1H; 10 and 3 Hz)                                    | 150.3                                   | C-7; C-7a; C-10                      |
| 9                   | 6.29 (dd; 1H; 10 and 1.9 Hz)                                  | 126.7                                   | C-7a                                 |
| 10                  | -                                                             | 186.5                                   | -                                    |
| 11                  | 6.41 (dd; 1H; 10 and 1.9 Hz)                                  | 127.8                                   | C-7a                                 |
| 12                  | 7.02 (dd; 1H; 10 and 3 Hz)                                    | 153.6                                   | C-10                                 |

<sup>a</sup> <sup>13</sup>C NMR signals were assigned using the HSQC and HMBC data.

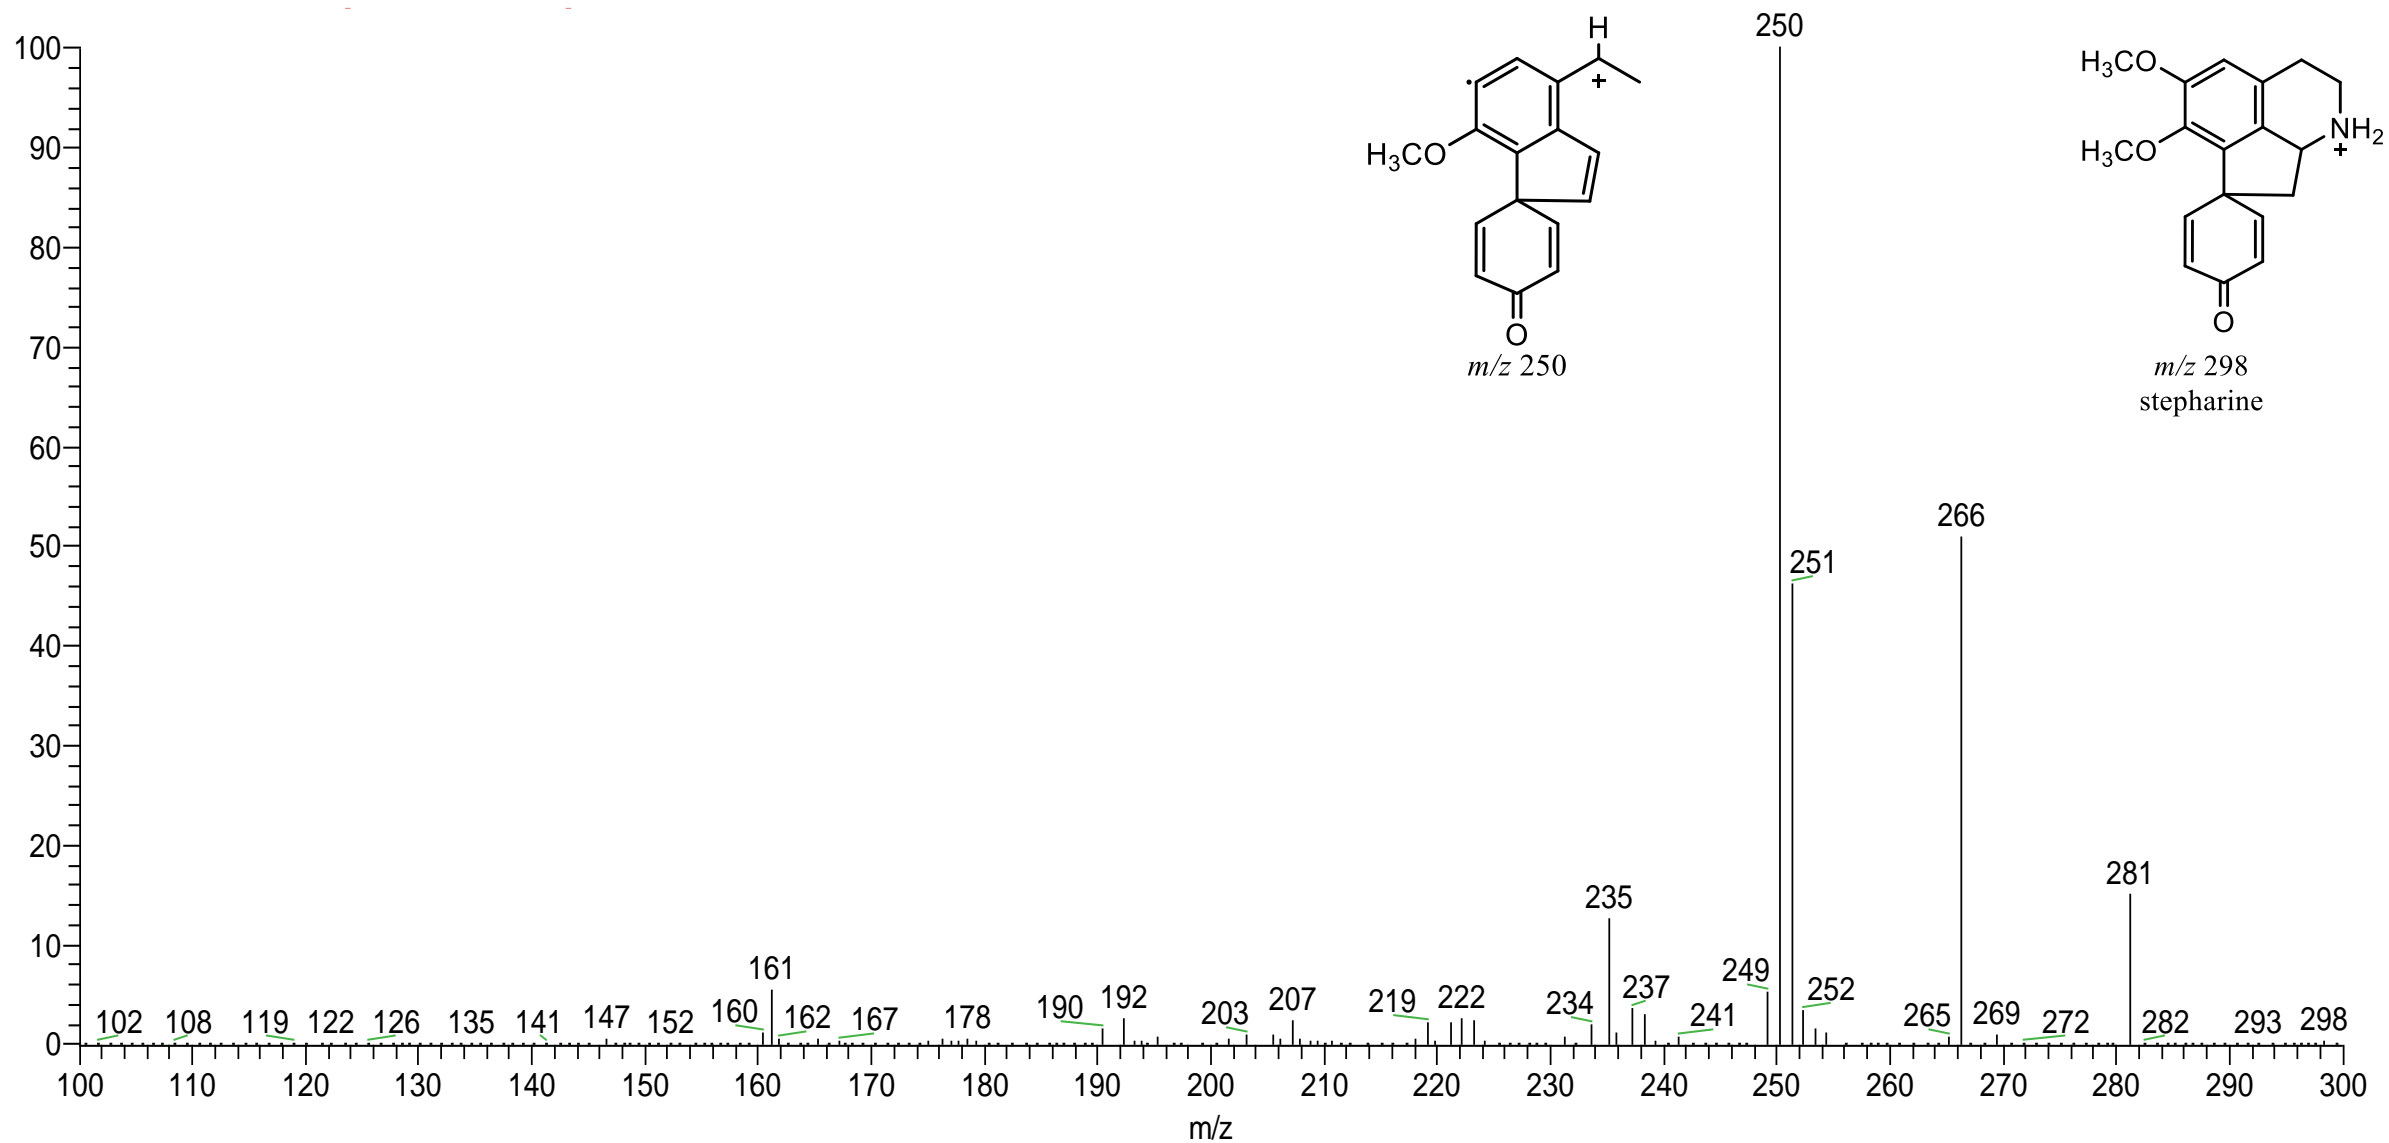

**Figure S16: Mass spectrum (MS/MS) of stepharine with chemical structure and identification of the main fragment ions.**

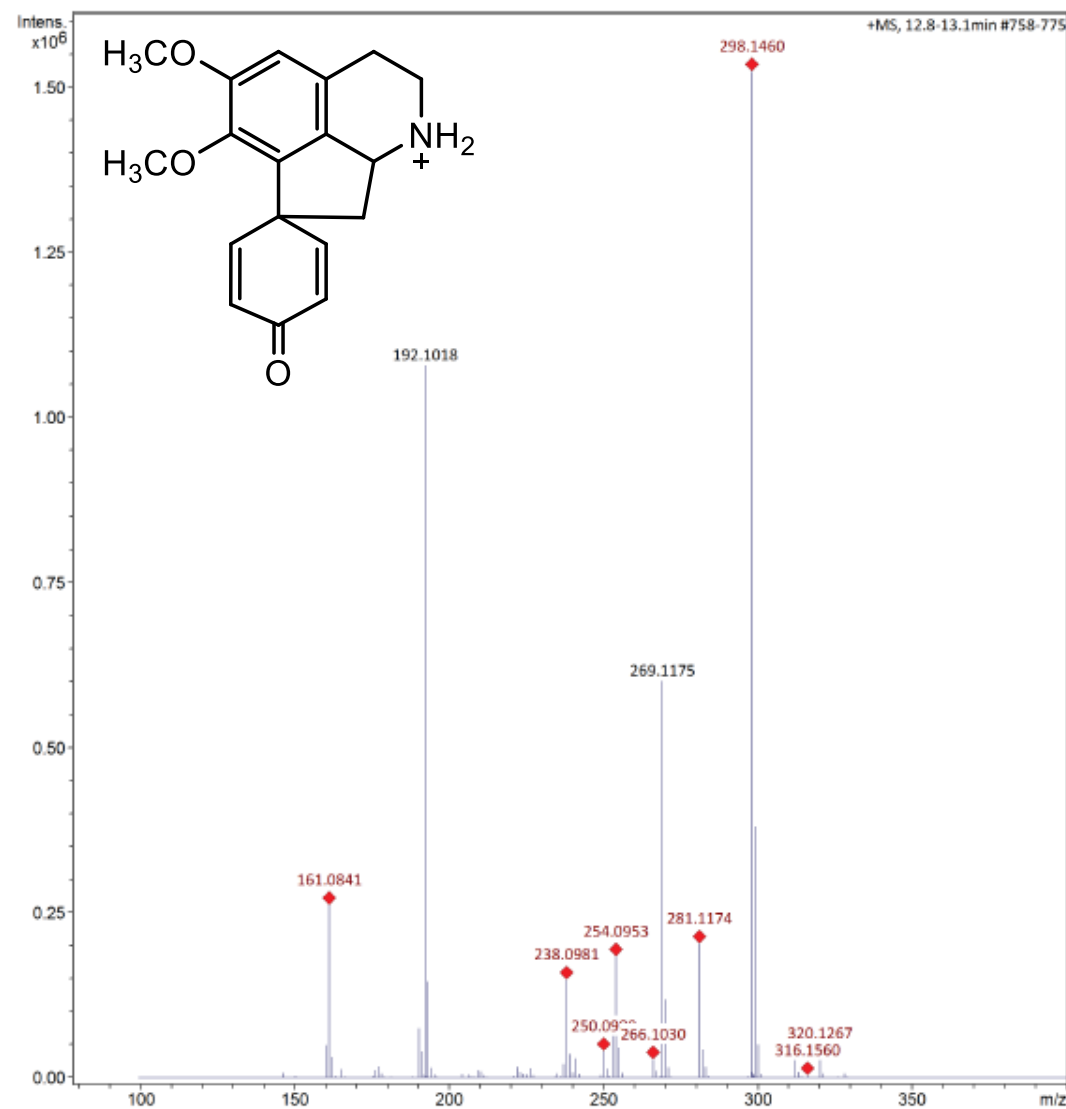

**Figure S17: High resolution mass spectrum of stepharine with chemical structure.**

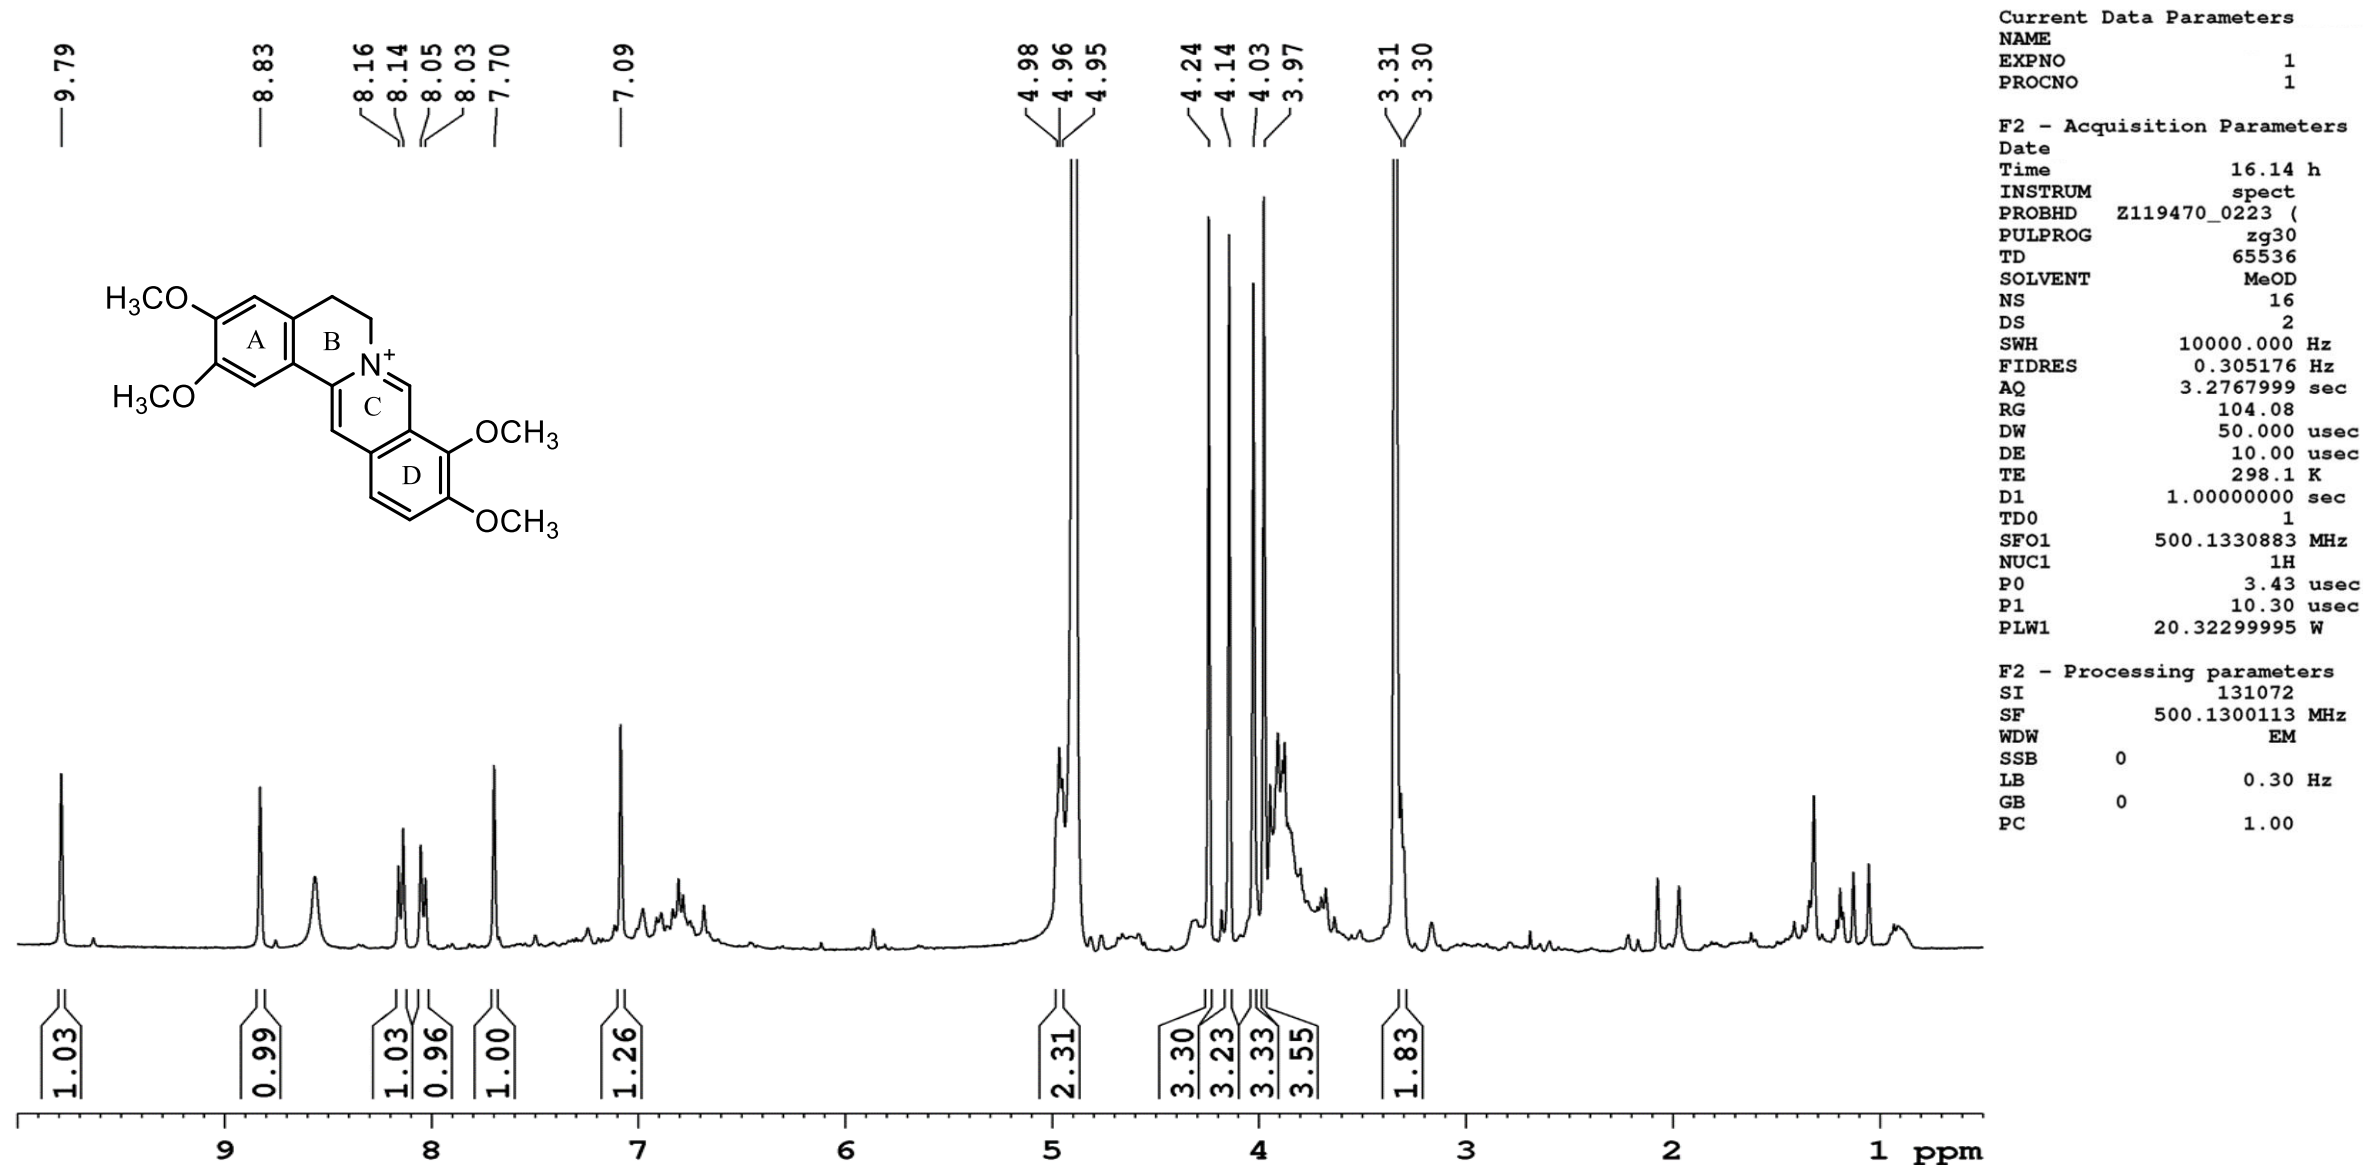

Figure S18: <sup>1</sup>H NMR spectrum (500 MHz, CD<sub>3</sub>OD d<sub>6</sub>, TMS) of palmatine.

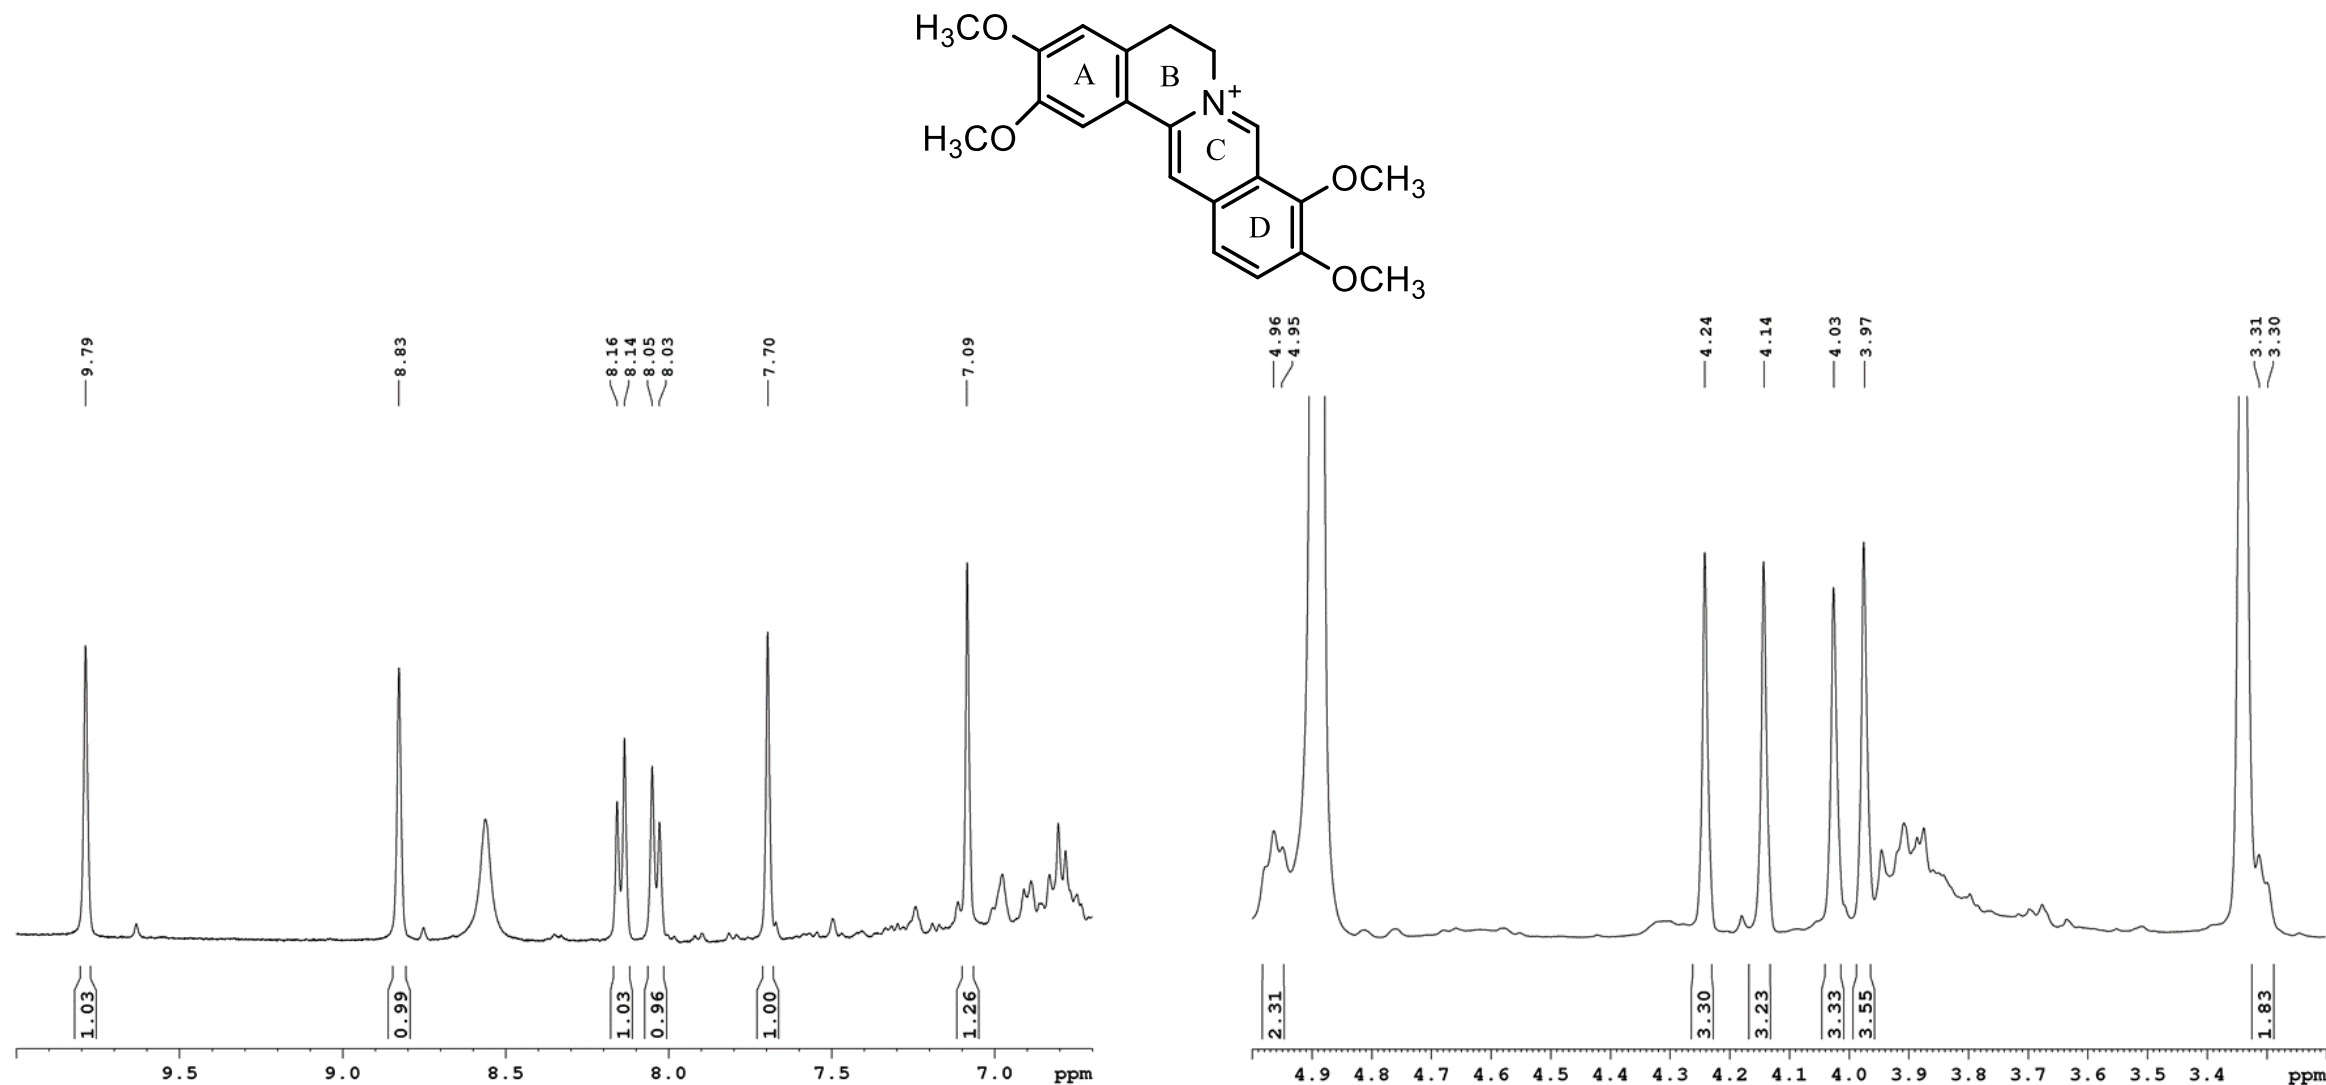

**Figure S19: Expanded low-field region of the  $^1\text{H}$  NMR spectrum (500 MHz,  $\text{CD}_3\text{OD}$   $d_6$ , TMS) of palmatine.**

```

Current Data Parameters
NAME
EXPNO 200
PROCNO 1

F2 - Acquisition Parameters
Date
Time 23.25 h
INSTRUM spect
PROBHD Z119470_0223 (
PULPROG hsqcqtgpsisp2.2
TD 2048
SOLVENT MeOD
NS 64
DS 16
SWH 6996.269 Hz
FIDRES 3.416147 Hz
AQ 0.1463637 sec
RG 187.25
DW 71.467 usec
DE 10.00 usec
TE 298.2 K
CNST2 145.0000000
CNST17 -0.5000000
DO 0.00000300 sec
D1 1.00000000 sec
D4 0.00172414 sec
D11 0.03000000 sec
D16 0.00020000 sec
D24 0.00089000 sec
LNO 0.00001850 sec
TDav 1
SF01 500.1325097 MHz
NUC1 1H
P1 9.40 usec
P2 18.80 usec
P28 1000.00 usec
PLW1 20.32299995 W
SF02 125.7703643 MHz
NUC2 13C
CPDPRG2 garp
P3 10.00 usec
P14 500.00 usec
P24 2000.00 usec
PCPD2 70.00 usec
PLW0 0 W
PLW2 88.00000000 W
PLW12 1.78668594 W
SPNAM[3] Crp60,0.5,20.1
SFOAL3 0.500
SPOFFS3 0 Hz
SPW3 13.44499969 W
SPNAM[7] Crp60comp.4
SFOAL7 0.500
SPOFFS7 0 Hz
SPW7 13.44499969 W
GPNAM[1] SMSQ10.100
GPZ1 80.00 %
GPNAM[2] SMSQ10.100
GPZ2 20.10 %
GPNAM[3] SMSQ10.100
GPZ3 11.00 %
GPNAM[4] SMSQ10.100
GPZ4 -5.00 %
P16 1000.00 usec
P19 600.00 usec

F1 - Acquisition parameters
TD 256
SF01 125.7704 MHz
FIDRES 211.148651 Hz
SW 214.892 ppm
FnMODE Echo-Antiecho

F2 - Processing parameters
SI 4096
SF 500.1300115 MHz
WDW QSINE
SSB 2
LB 0 Hz
GB 0
PC 1.40

F1 - Processing parameters
SI 1024
MC2 echo-antiecho
SF 125.7577885 MHz
WDW QSINE
SSB 2
LB 0 Hz
GB 0

```

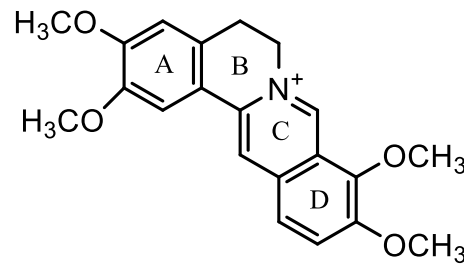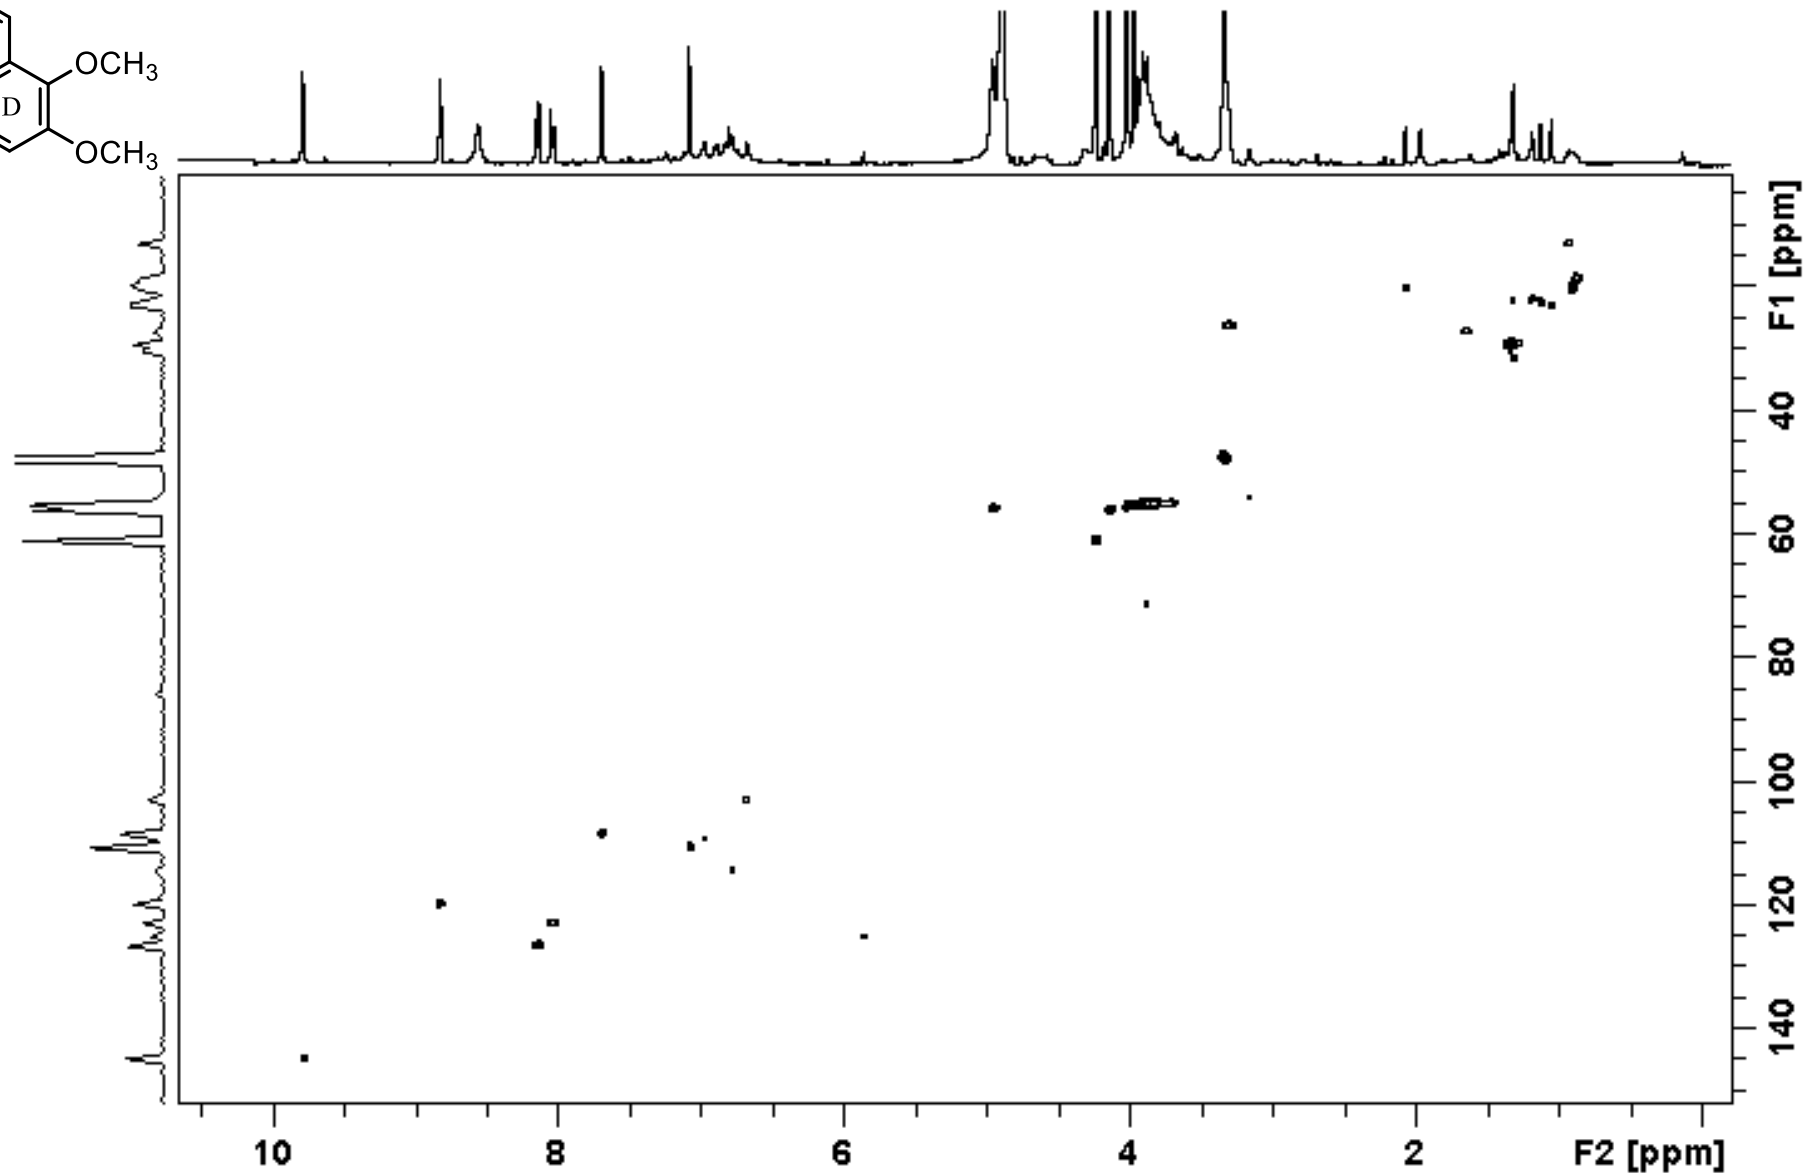

Figure S20: HSQC spectrum (125 MHz, CD<sub>3</sub>OD, TMS) of palmatine.

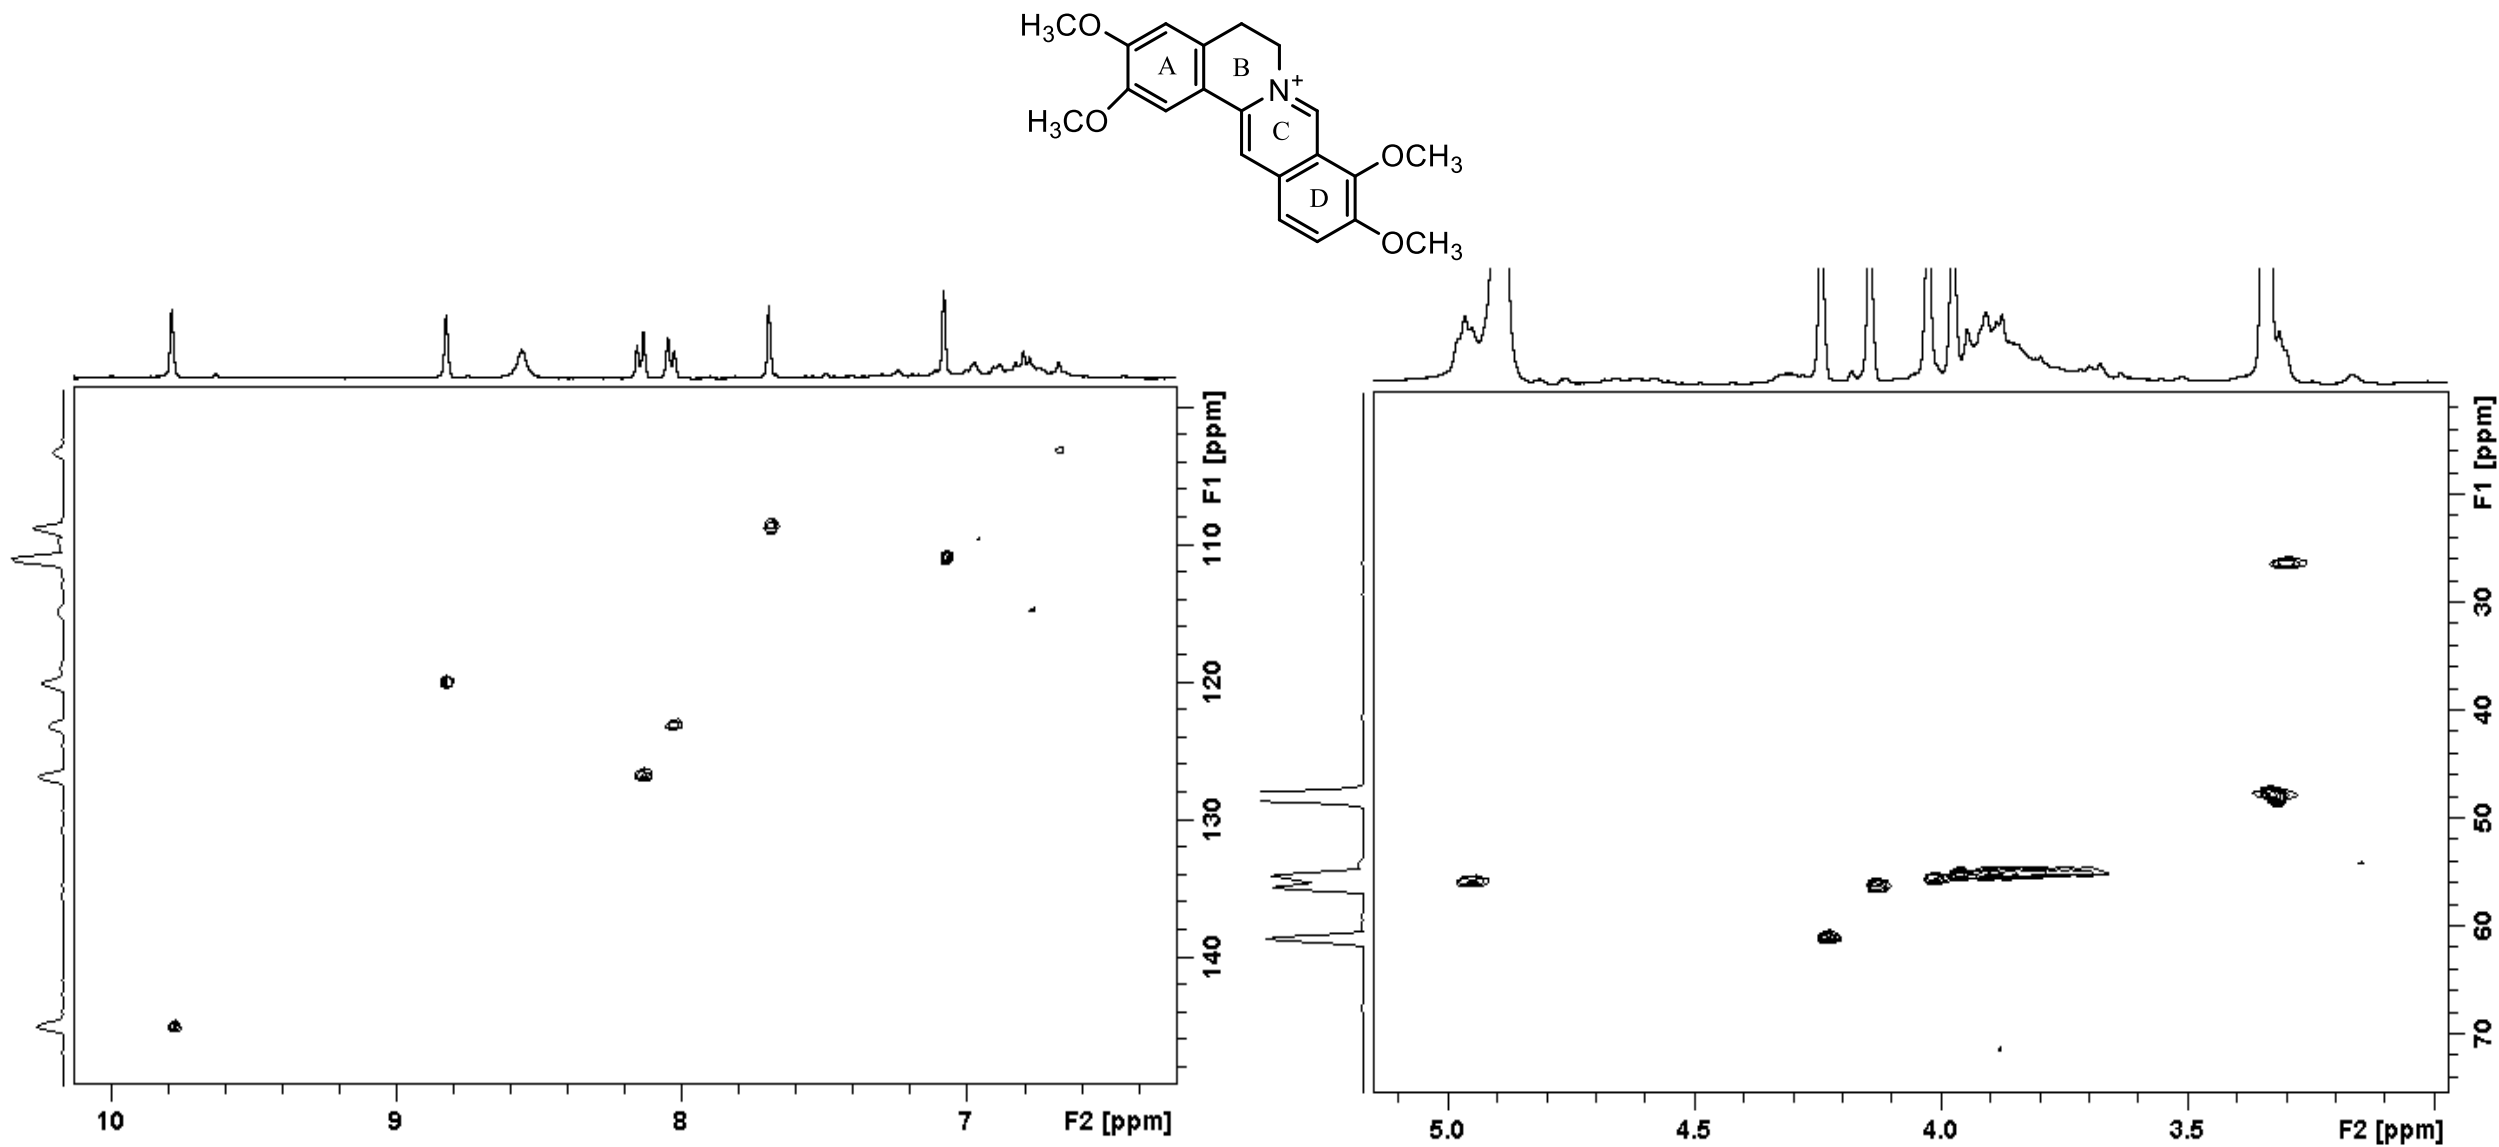

**Figure S21: Expanded regions of the HSQC spectrum (125 MHz, CD<sub>3</sub>OD, TMS) of palmatine.**

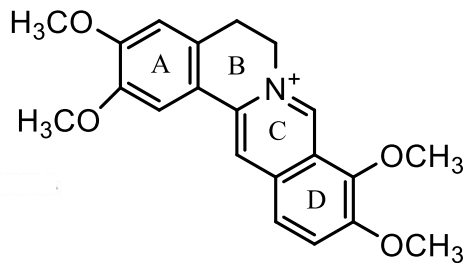

Current Data Parameters  
NAME  
EXPNO 300  
PROCNO 1

F2 - Acquisition Parameters  
Date  
Time 4.46 h  
INSTRUM spect  
PROBHD Z119470.0223 (  
PULPROG hmbcgp1pndqf  
TD 2048  
SOLVENT MeOD  
NS 98  
DS 16  
SWH 7002.801 Hz  
FIDRES 3.419337 Hz  
AQ 0.1462272 sec  
RG 187.25  
DW 71.400 usec  
DE 10.00 usec  
TE 298.2 K  
CNST2 145.0000000  
CNST13 8.0000000  
D0 0.00000300 sec  
D1 1.00000000 sec  
D2 0.00344828 sec  
D6 0.06250000 sec  
D16 0.00020000 sec  
IN0 0.00001660 sec  
TDav 1  
SFO1 500.1325097 MHz  
NUC1 1H  
P1 9.40 usec  
P2 18.80 usec  
PLW1 20.32299995 W  
SFO2 125.7716219 MHz  
NUC2 13C  
P3 10.00 usec  
PLW2 88.00000000 W  
GPNAM[1] SMSQ10.100  
GPZ1 50.00 %  
GPNAM[2] SMSQ10.100  
GPZ2 30.00 %  
GPNAM[3] SMSQ10.100  
GPZ3 40.10 %  
P16 1000.00 usec

F1 - Acquisition parameters  
TD 312  
SFO1 125.7716 MHz  
FIDRES 193.080017 Hz  
SW 239.486 ppm  
FnMODE QF

F2 - Processing parameters  
SI 4096  
SF 500.1300115 MHz  
WDW SINE  
SSB 0  
LB 0 Hz  
GB 0  
PC 1.40

F1 - Processing parameters  
SI 1024  
MC2 QF  
SF 125.7577885 MHz  
WDW SINE  
SSB 0  
LB 0 Hz  
GB 0

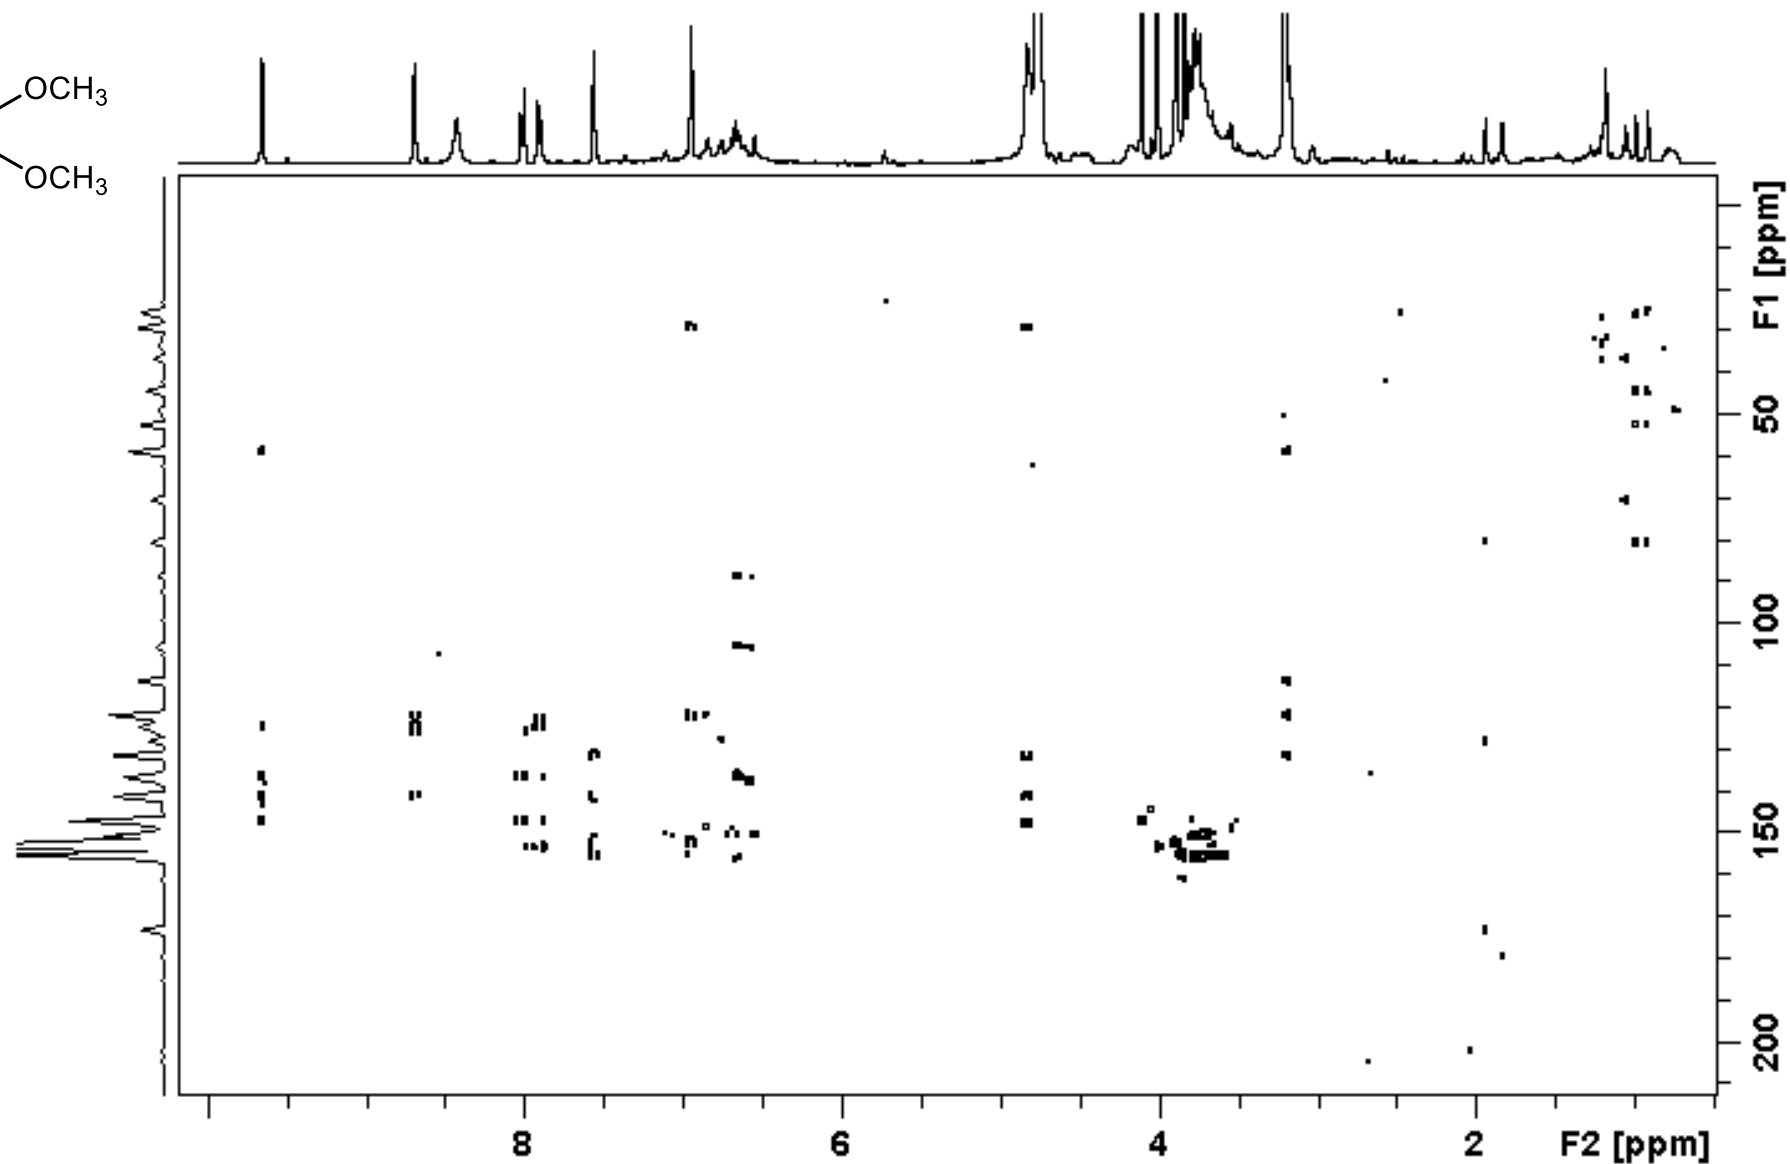

Figure S22: HMBC spectrum (125 MHz, CD<sub>3</sub>OD, TMS) of palmatine.



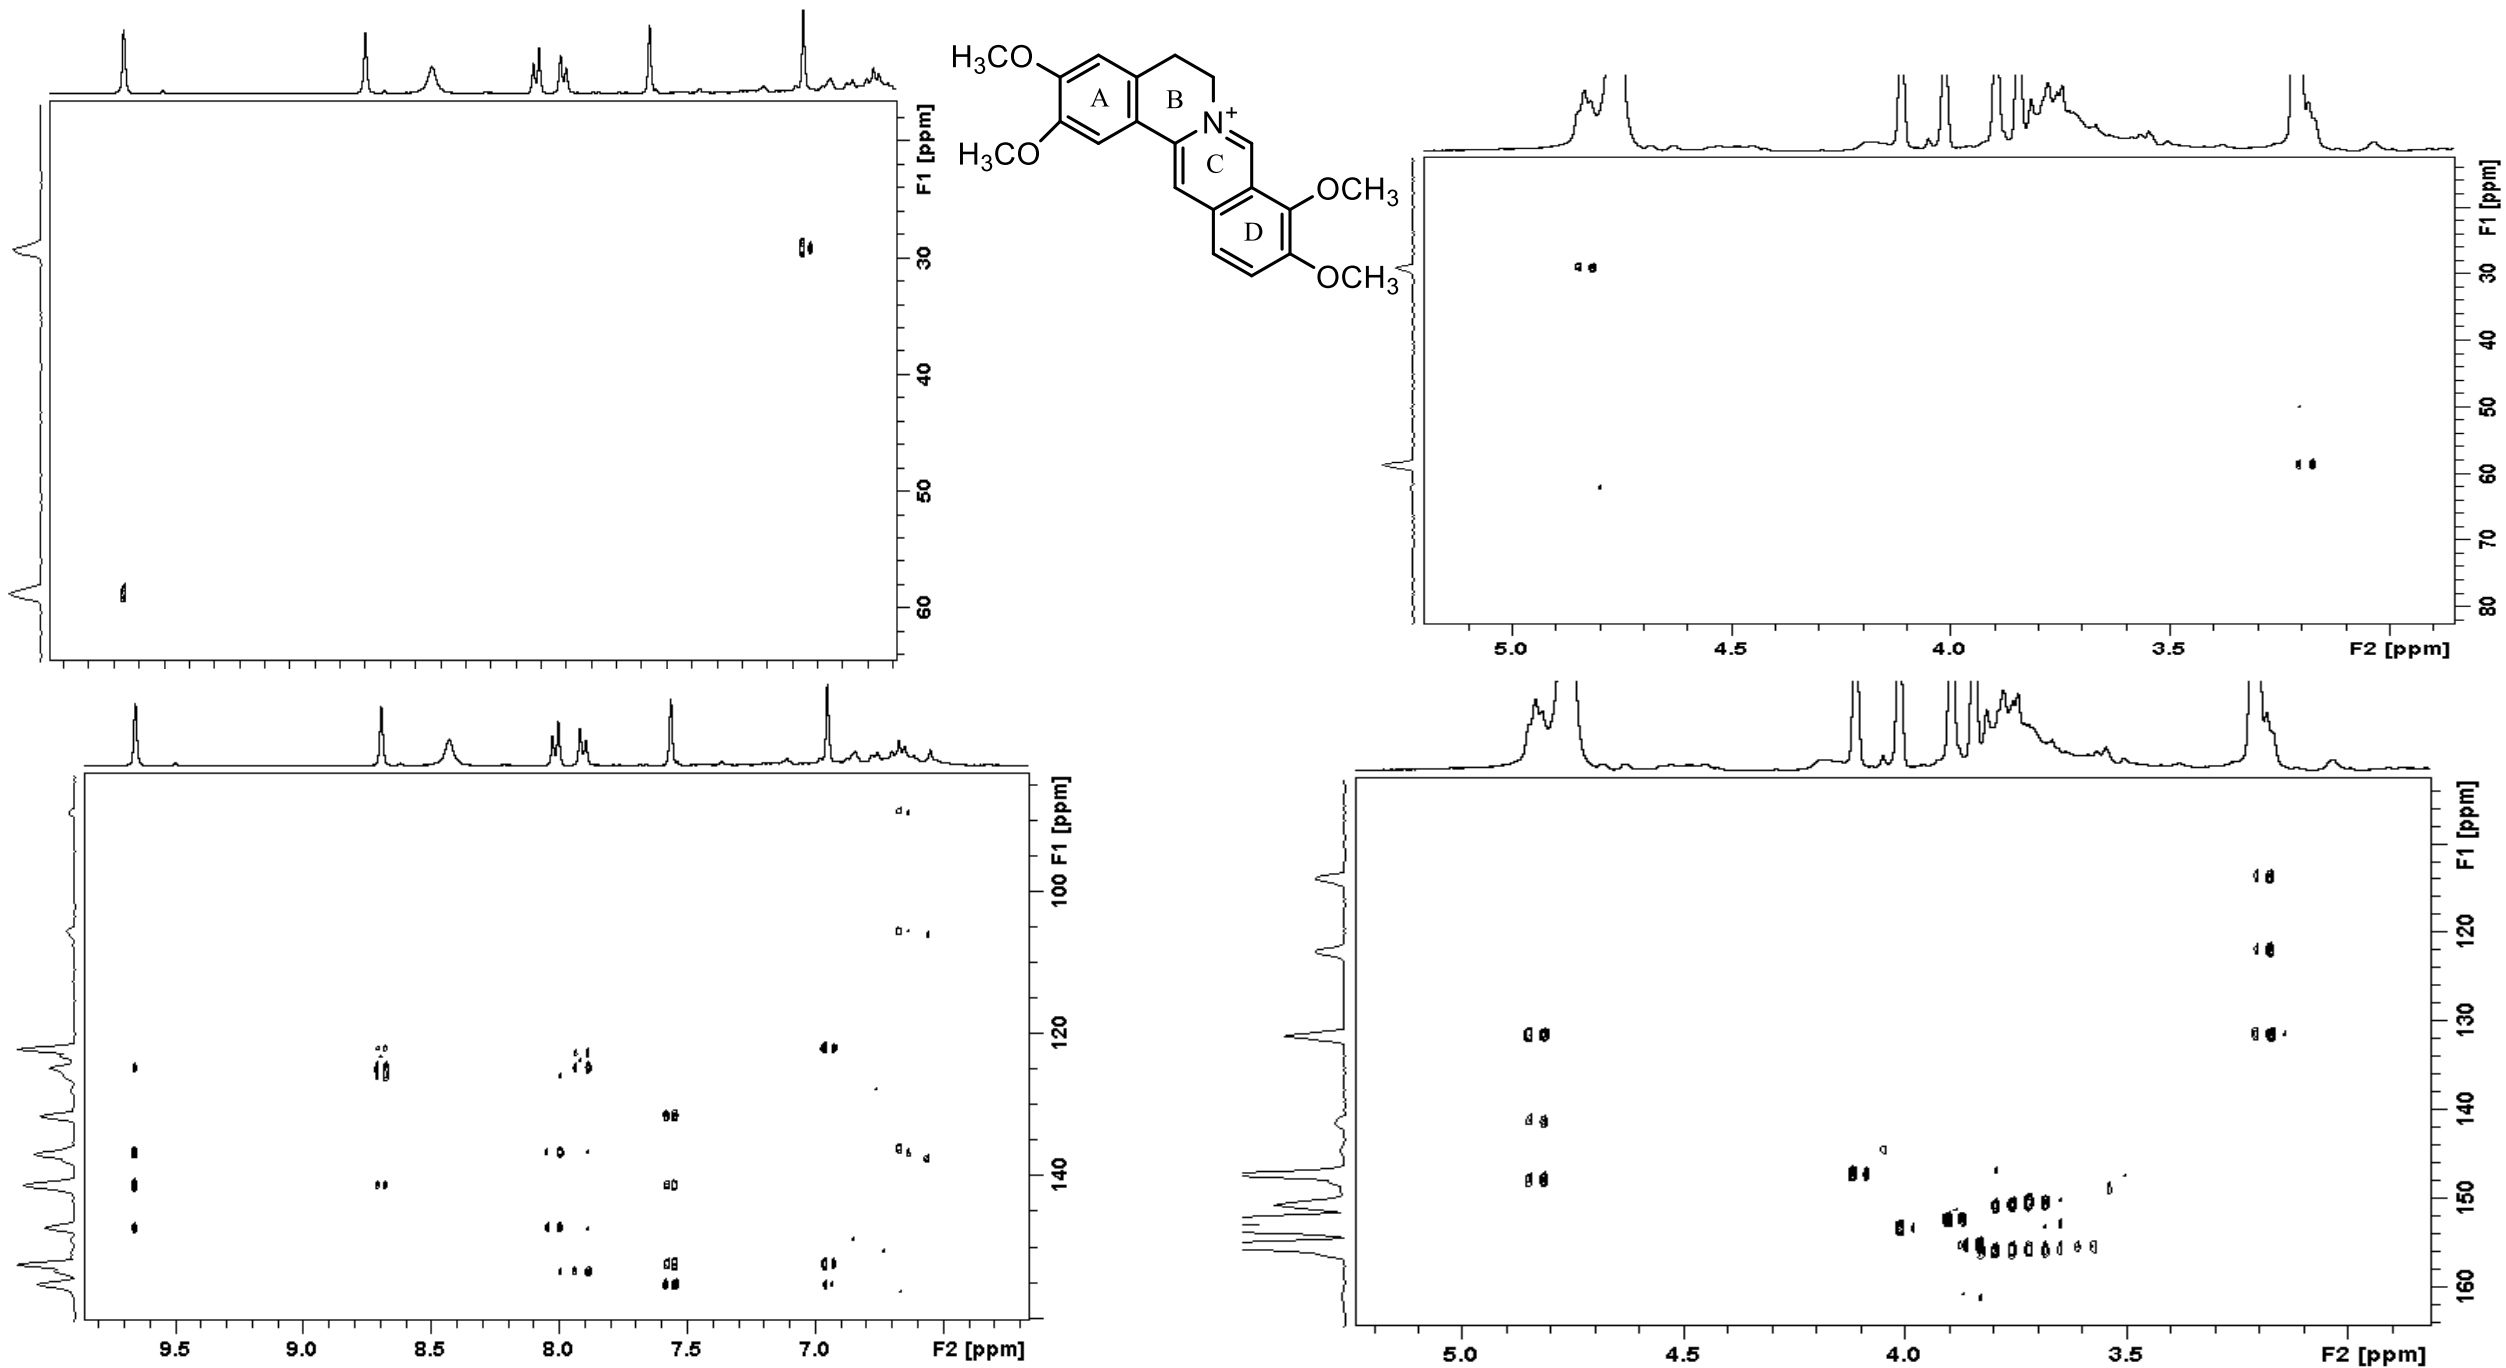

**Figure S23: Expanded regions of the HMBC spectrum (125 MHz, CD<sub>3</sub>OD, TMS) of palmatine.**

**Table S3: NMR chemical shifts of palmatine.** The experiments were realized in CD<sub>3</sub>OD at magnetic field strength of 11.7 T; 500 MHz for <sup>1</sup>H NMR.

s: singlet; m: multiplet; dd: doublet of doublets; ddd: doublet of doublets of doublets.

| Position            | <sup>1</sup> H                                          | <sup>13</sup> C                         |                                |
|---------------------|---------------------------------------------------------|-----------------------------------------|--------------------------------|
|                     | δ <sub>H</sub> , ppm (multiplicity; number of H; J, Hz) | δ <sub>C</sub> (HSQC), ppm <sup>a</sup> | HMBC, ppm <sup>a</sup>         |
| 1                   | 7.08 (s; 1H)                                            | 110.6                                   | C-5; C-4a; C-2; C-3            |
| 2                   | -                                                       | 152.2                                   | -                              |
| 2-OCH <sub>3</sub>  | 4.02 (s; 3H)                                            | 57.7                                    | C-2                            |
| 3                   | -                                                       | 155.1                                   | -                              |
| 3-OCH <sub>3</sub>  | 3.97 (s; 3H)                                            | 57.2                                    | C-3                            |
| 4                   | 7.69 (s; 1H)                                            | 112.8                                   | C-13b; C-13a; C-2;<br>C-3      |
| 4a                  | -                                                       | 121.9                                   | -                              |
| 5                   | 3.30 (m; 2H)                                            | 29.1                                    | C-6; C-1; C-4; C-4a;<br>C-13b  |
| 6                   | 4.96 (m; 2H)                                            | 58.5                                    | C-5; C-13b; C-13a;<br>C-8      |
| 7                   | -                                                       | -                                       | -                              |
| 8                   | 9.79 (s; 1H)                                            | 146.9                                   | C-6; C-13a; C-12;<br>C-8a; C-9 |
| 8a                  | -                                                       | 136.6                                   | -                              |
| 9                   | -                                                       | 147.1                                   | -                              |
| 9-OCH <sub>3</sub>  | 4.24 (s; 3H)                                            | 63.2                                    | C-9                            |
| 10                  | -                                                       | 153.3                                   | -                              |
| 10-OCH <sub>3</sub> | 4.14 (s; 3H)                                            | 58.5                                    | C-10                           |
| 11                  | 8.14 (d; 1H; 9.3 Hz)                                    | 128.7                                   | C-12; C-8a; C-9; C-10          |
| 12                  | 8.04 (d; 1H; 8.8 Hz)                                    | 125.1                                   | C-12a; C-8a; C-9;<br>C-10      |
| 12a                 | -                                                       | 122.7                                   | -                              |
| 13                  | 8.82 (s; 1H)                                            | 121.8                                   | C-12; C-13a                    |
| 13a                 | -                                                       | 141.2                                   | -                              |
| 13b                 | -                                                       | 131.5                                   | -                              |

<sup>a</sup> <sup>13</sup>C NMR signals were assigned using the HSQC and HMBC data.

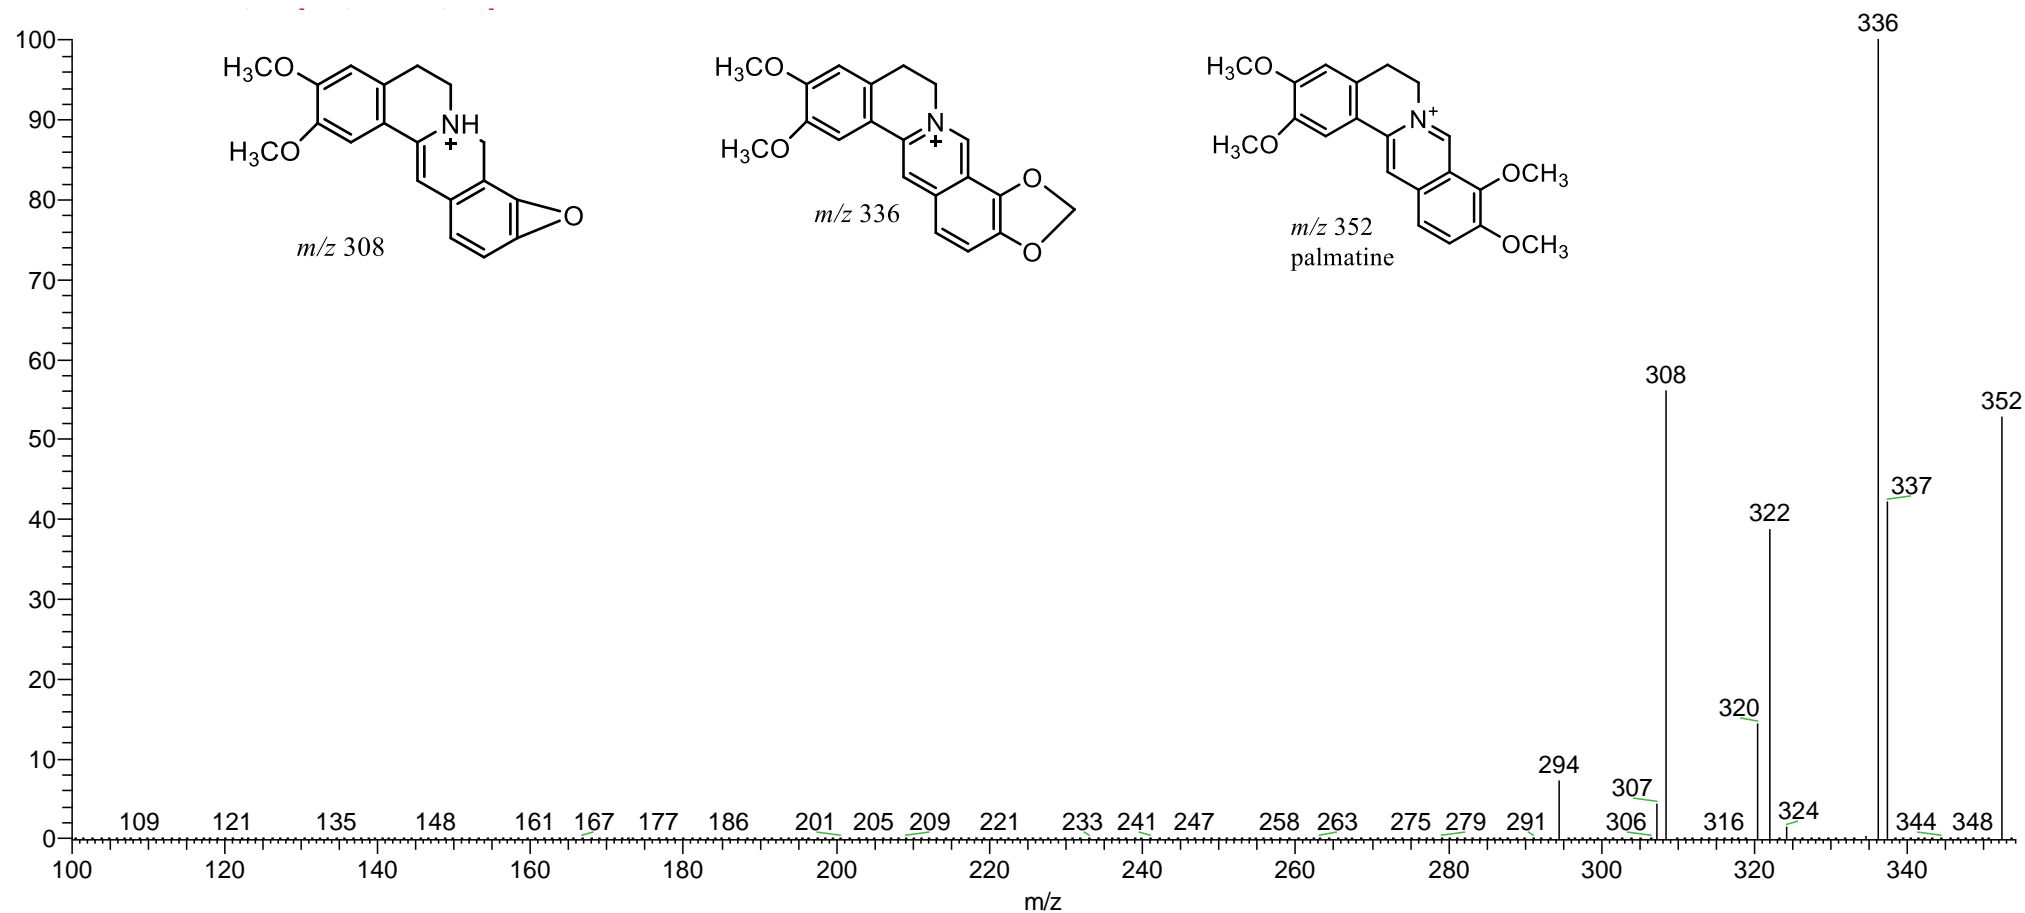

**Figure S24: Mass spectrum (MS/MS) of palmatine with chemical structure and identification of the main fragment ions.**

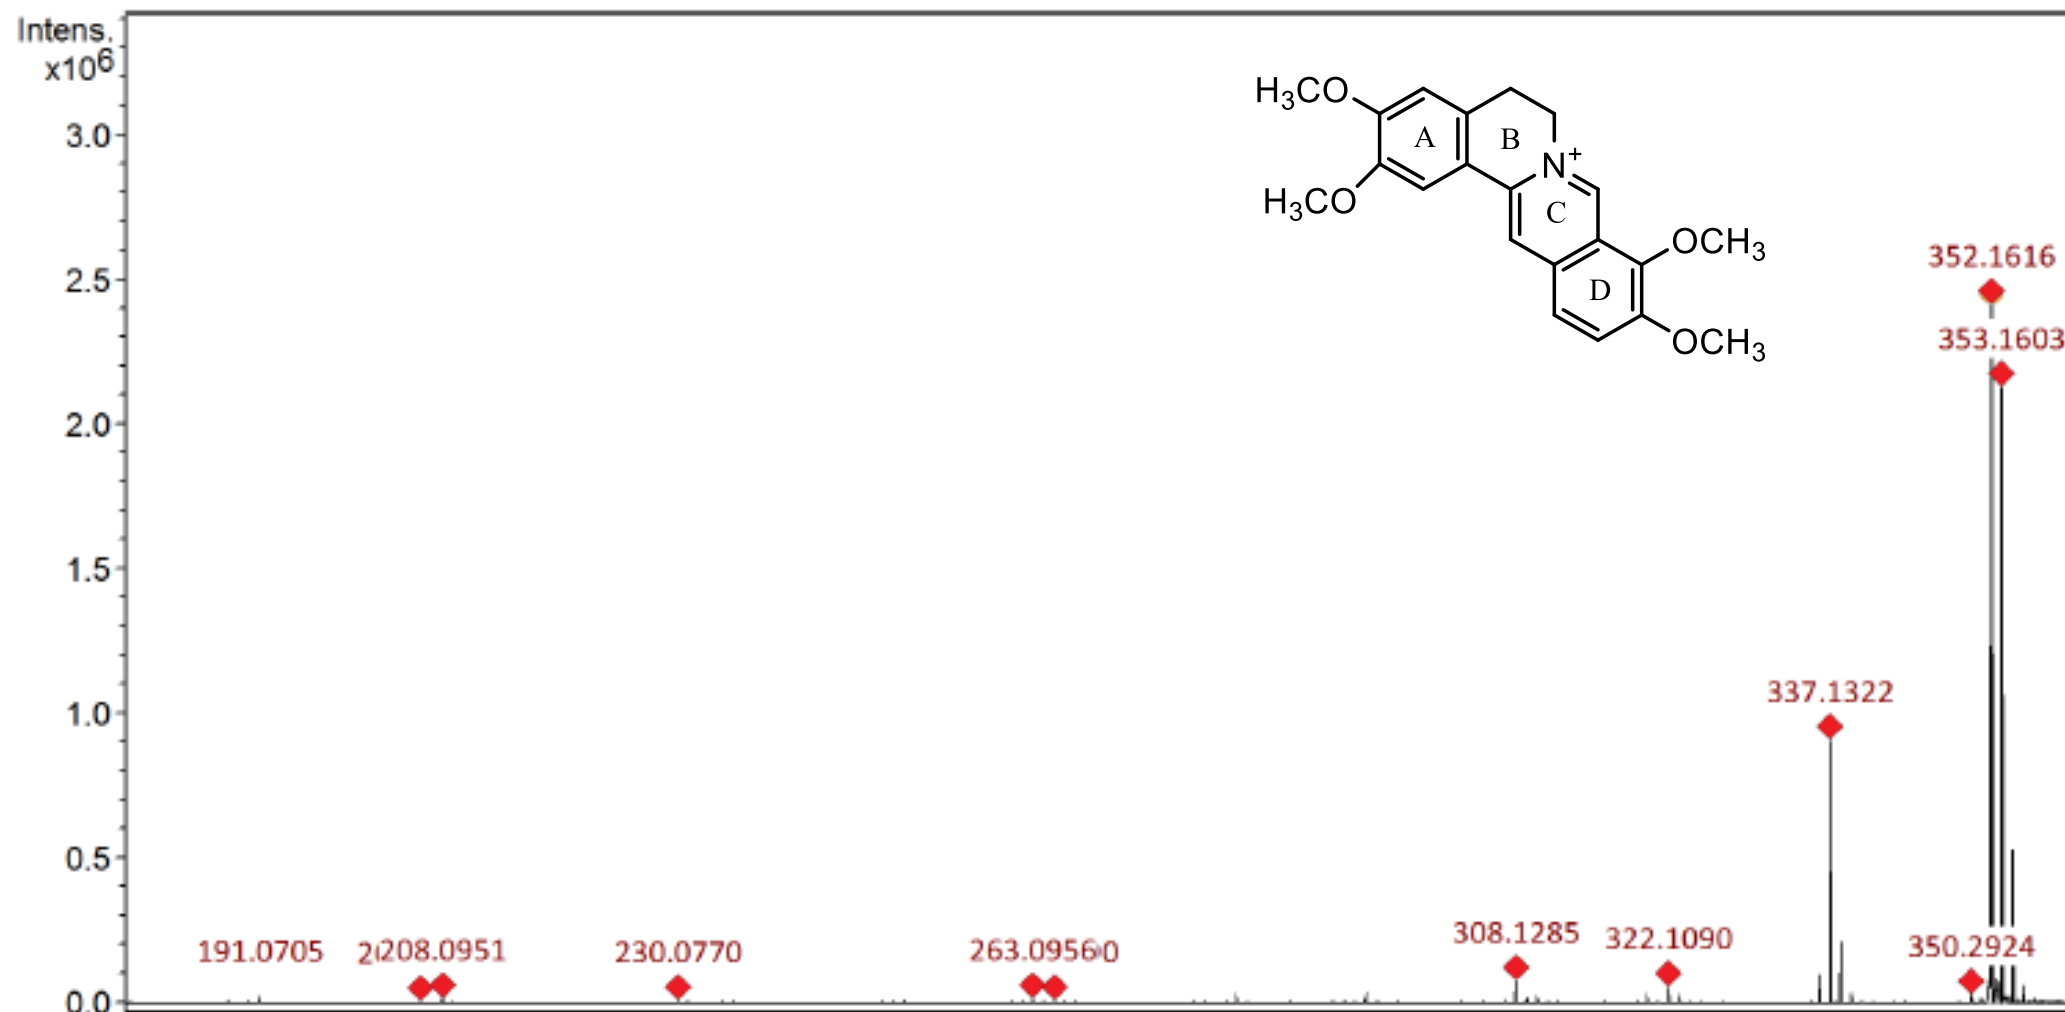

**Figure S25: High resolution mass-spectrum of palmatine with chemical structure.**

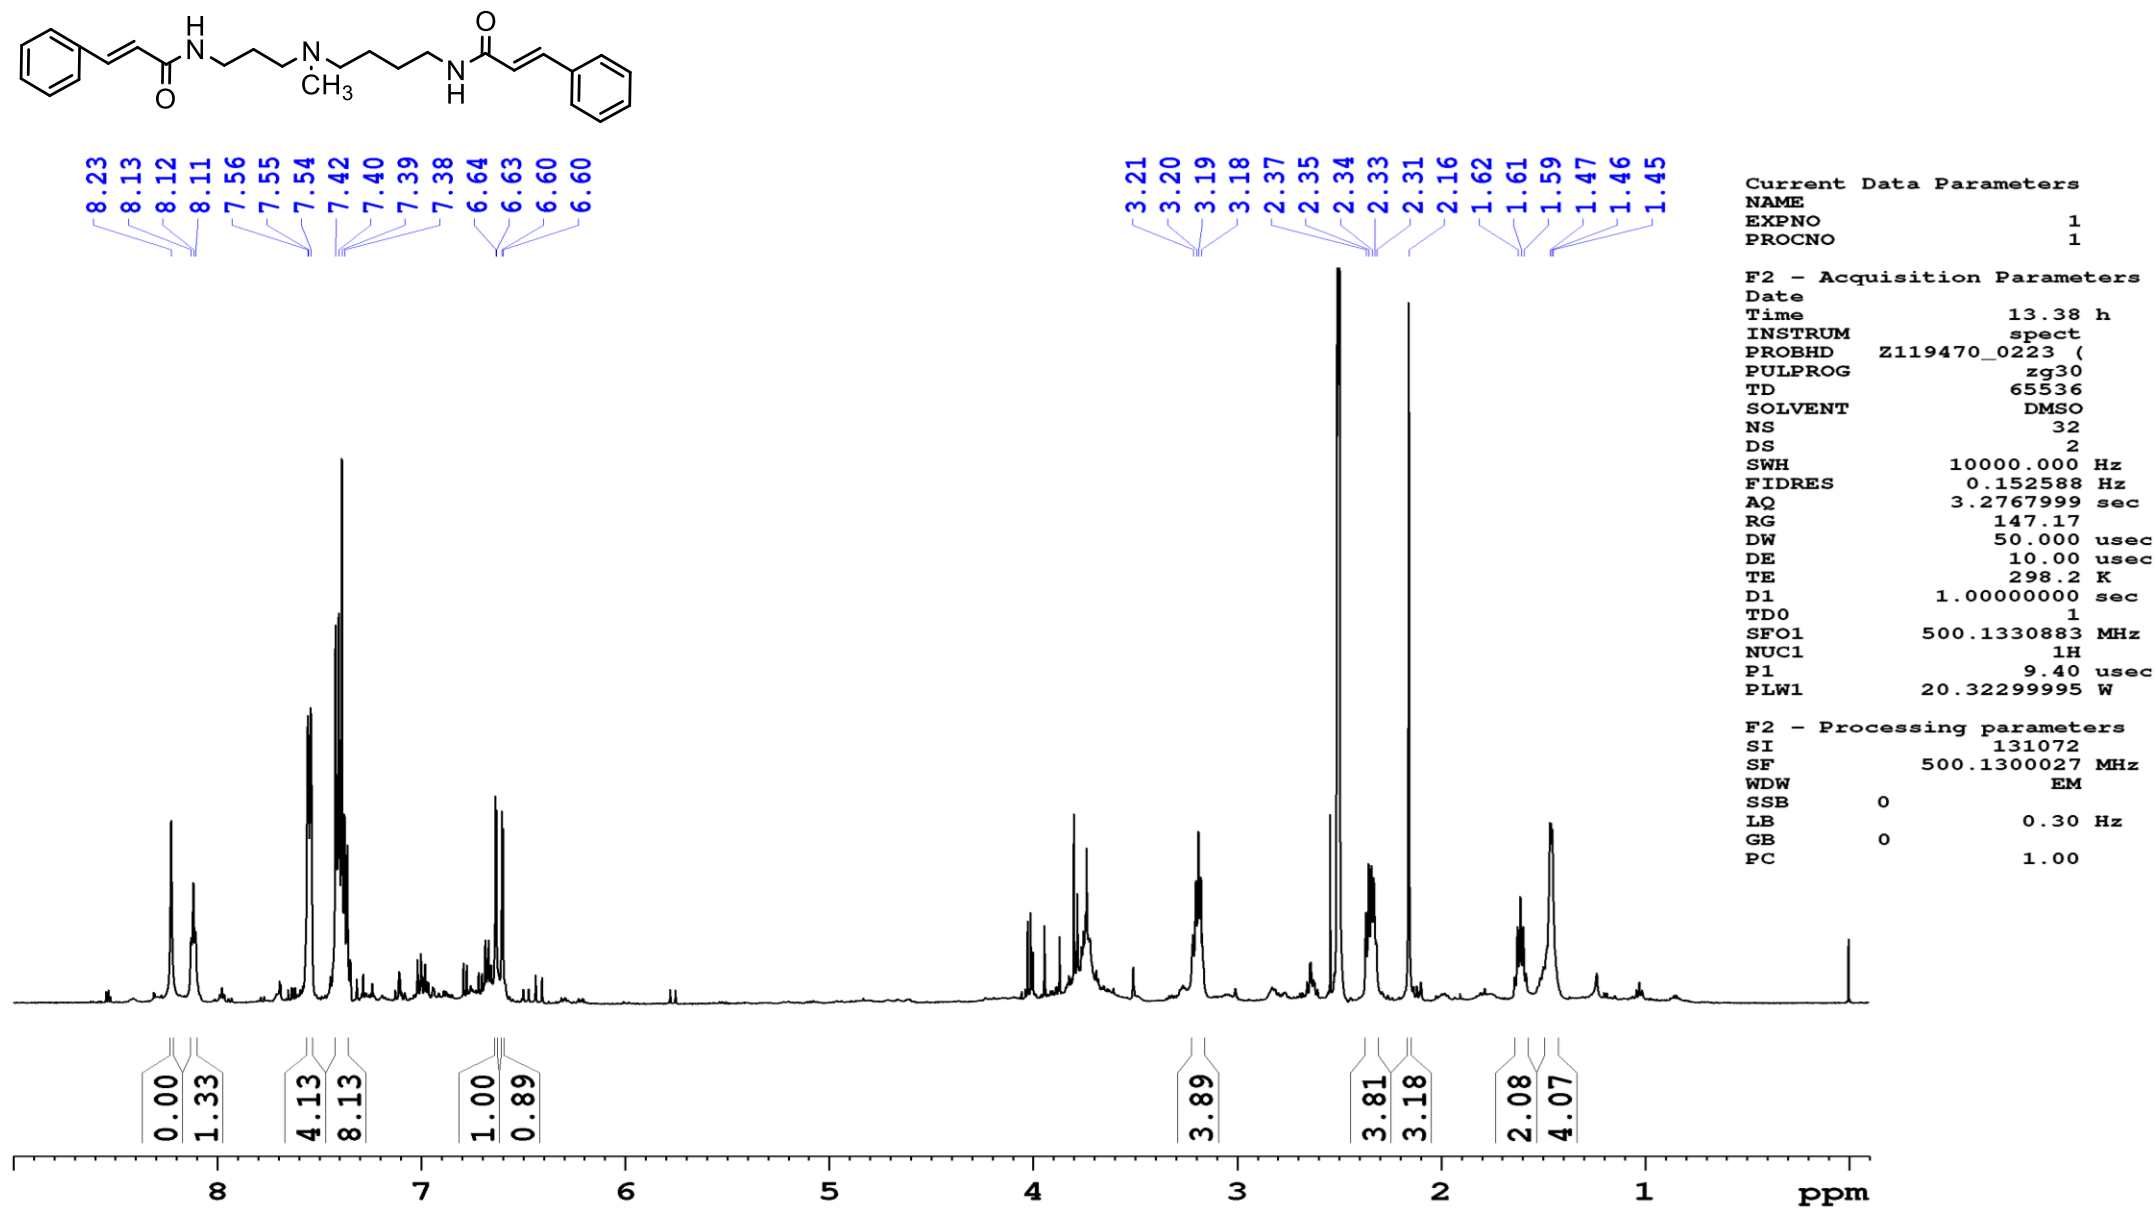

Figure S26:  $^1\text{H}$  NMR spectrum (500 MHz, DMSO  $d_6$ , TMS) of 5-*N*-methylmaytenine.

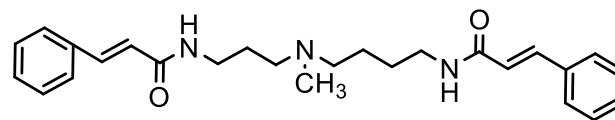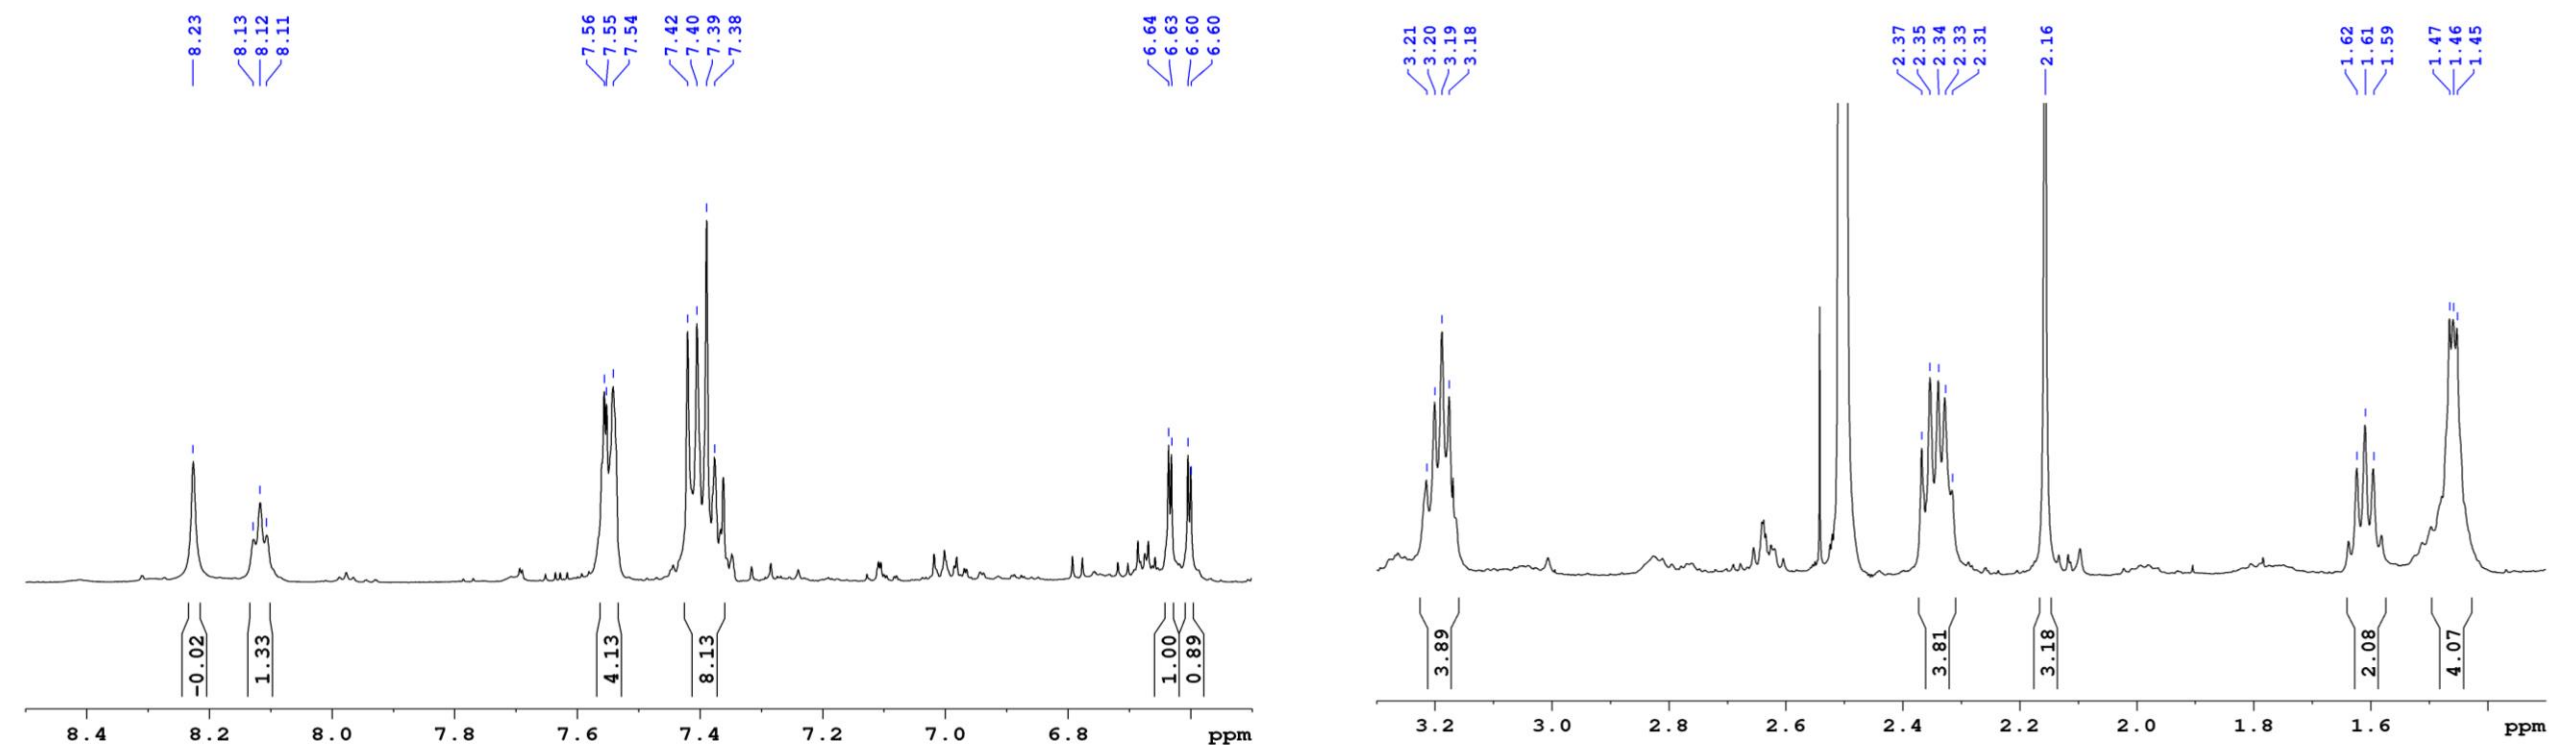

**Figure S27:** Expanded low-field region of the  $^1\text{H}$  NMR spectrum (500 MHz,  $\text{DMSO } d_6$ , TMS) of 5-*N*-methylmaytenine.

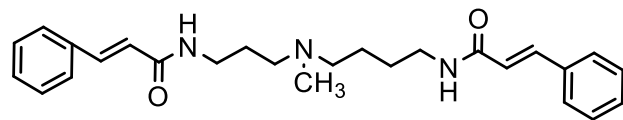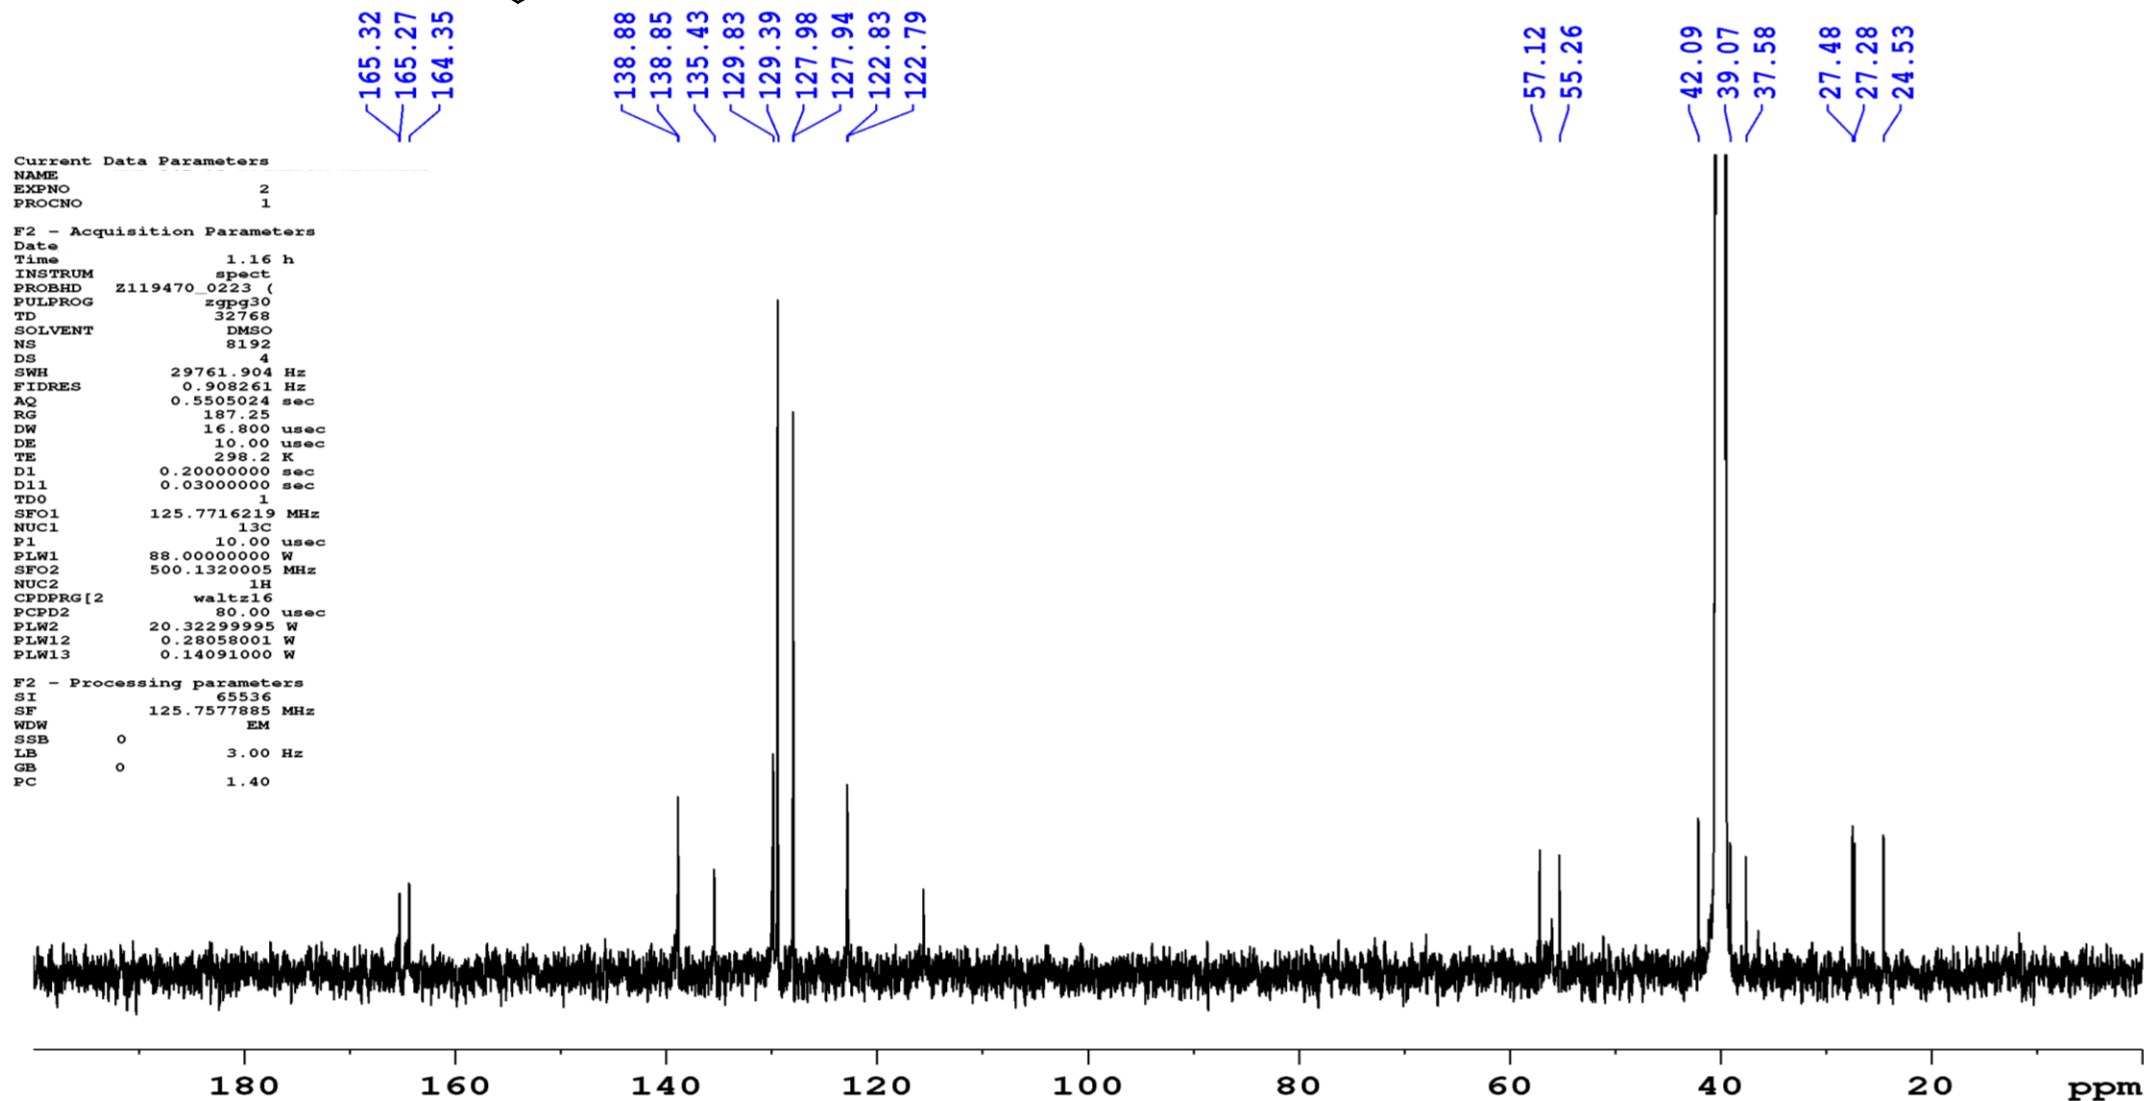

Figure S28:  $^{13}\text{C}$  NMR spectrum (125 MHz, DMSO  $\text{d}_6$ , TMS) of 5-*N*-methylmaytenine.

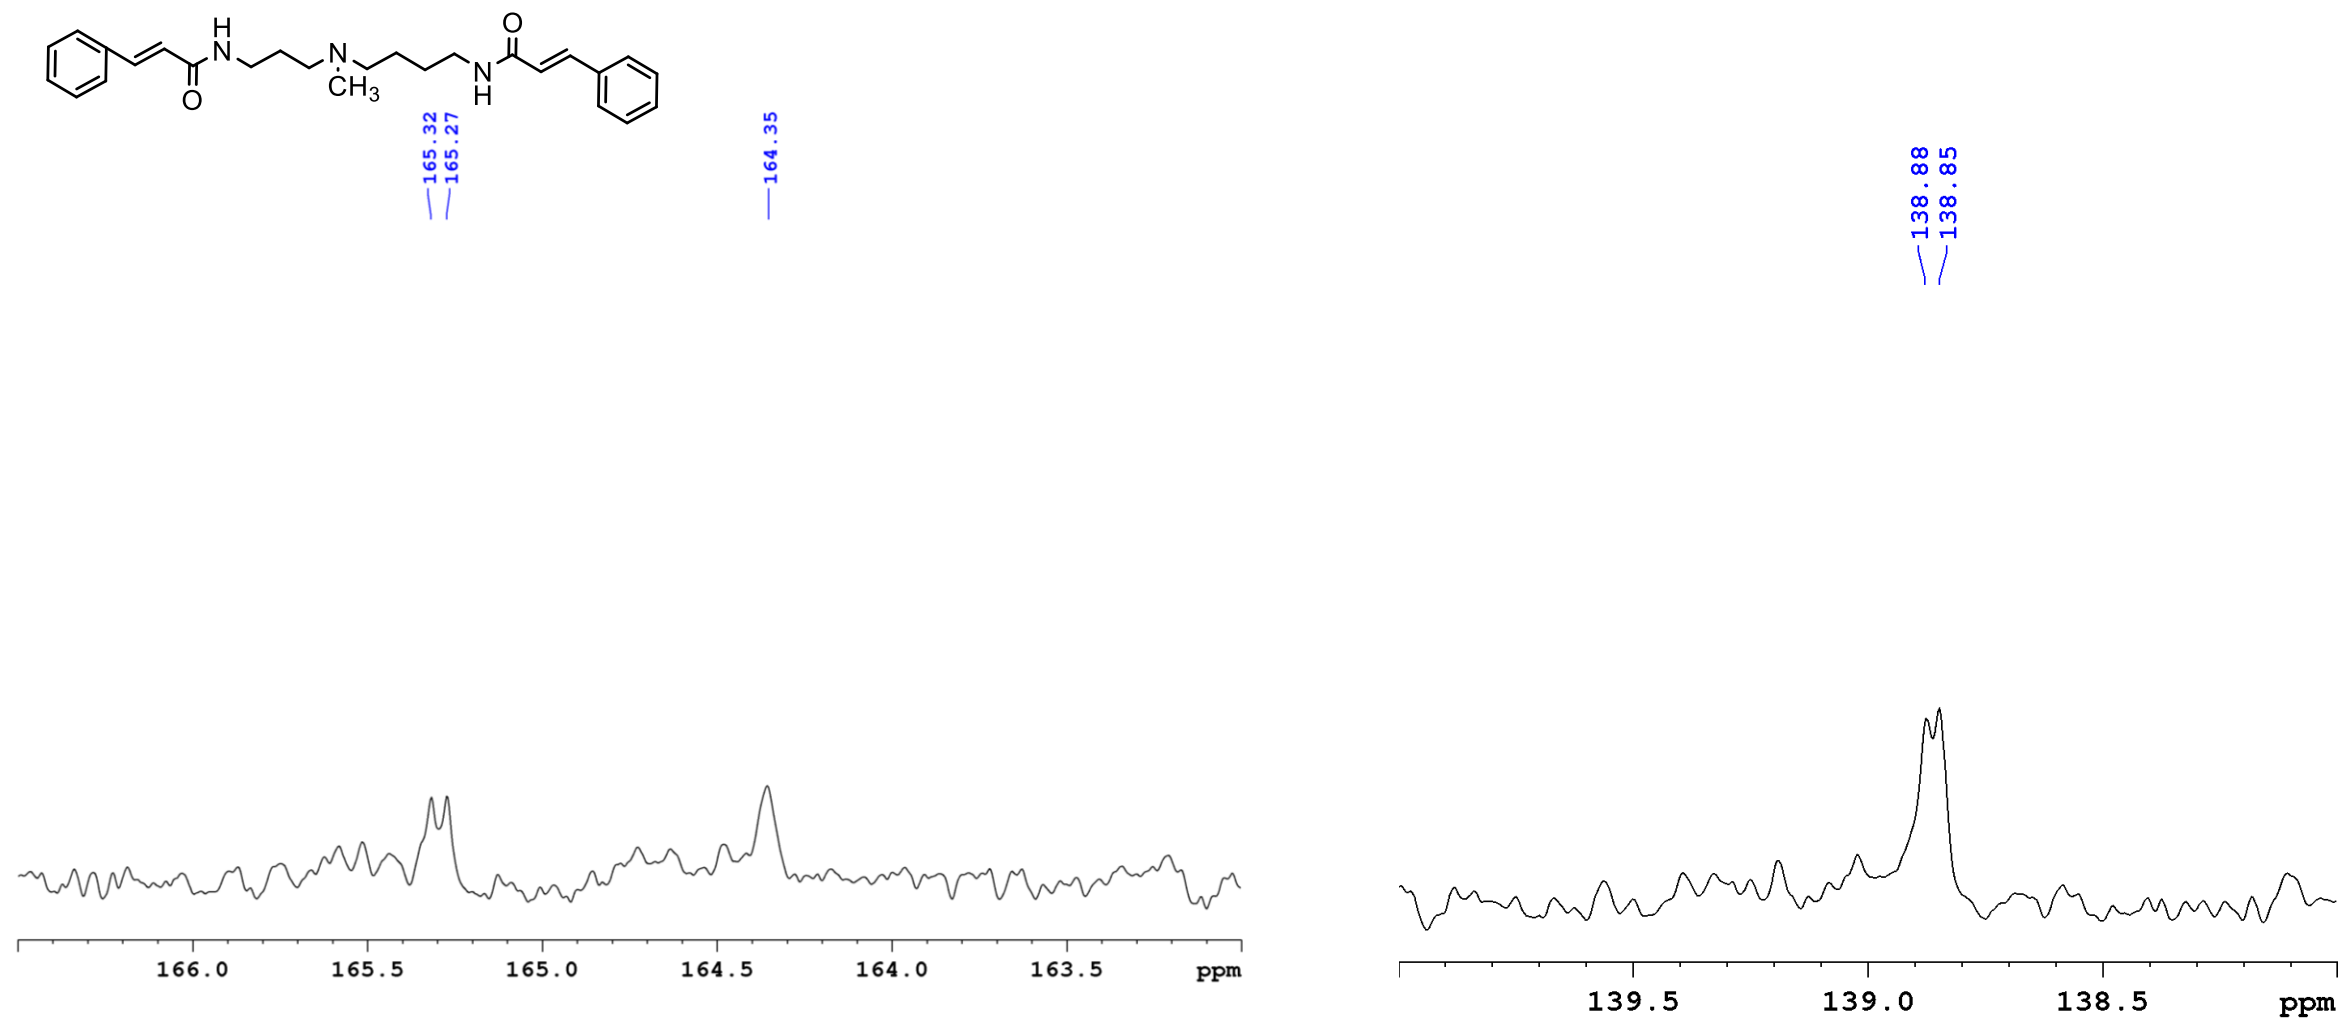

**Figure S29:** Expanded regions of the  $^{13}\text{C}$  NMR spectrum (125 MHz, DMSO  $d_6$ , TMS) of 5-*N*-methylmaytenine.



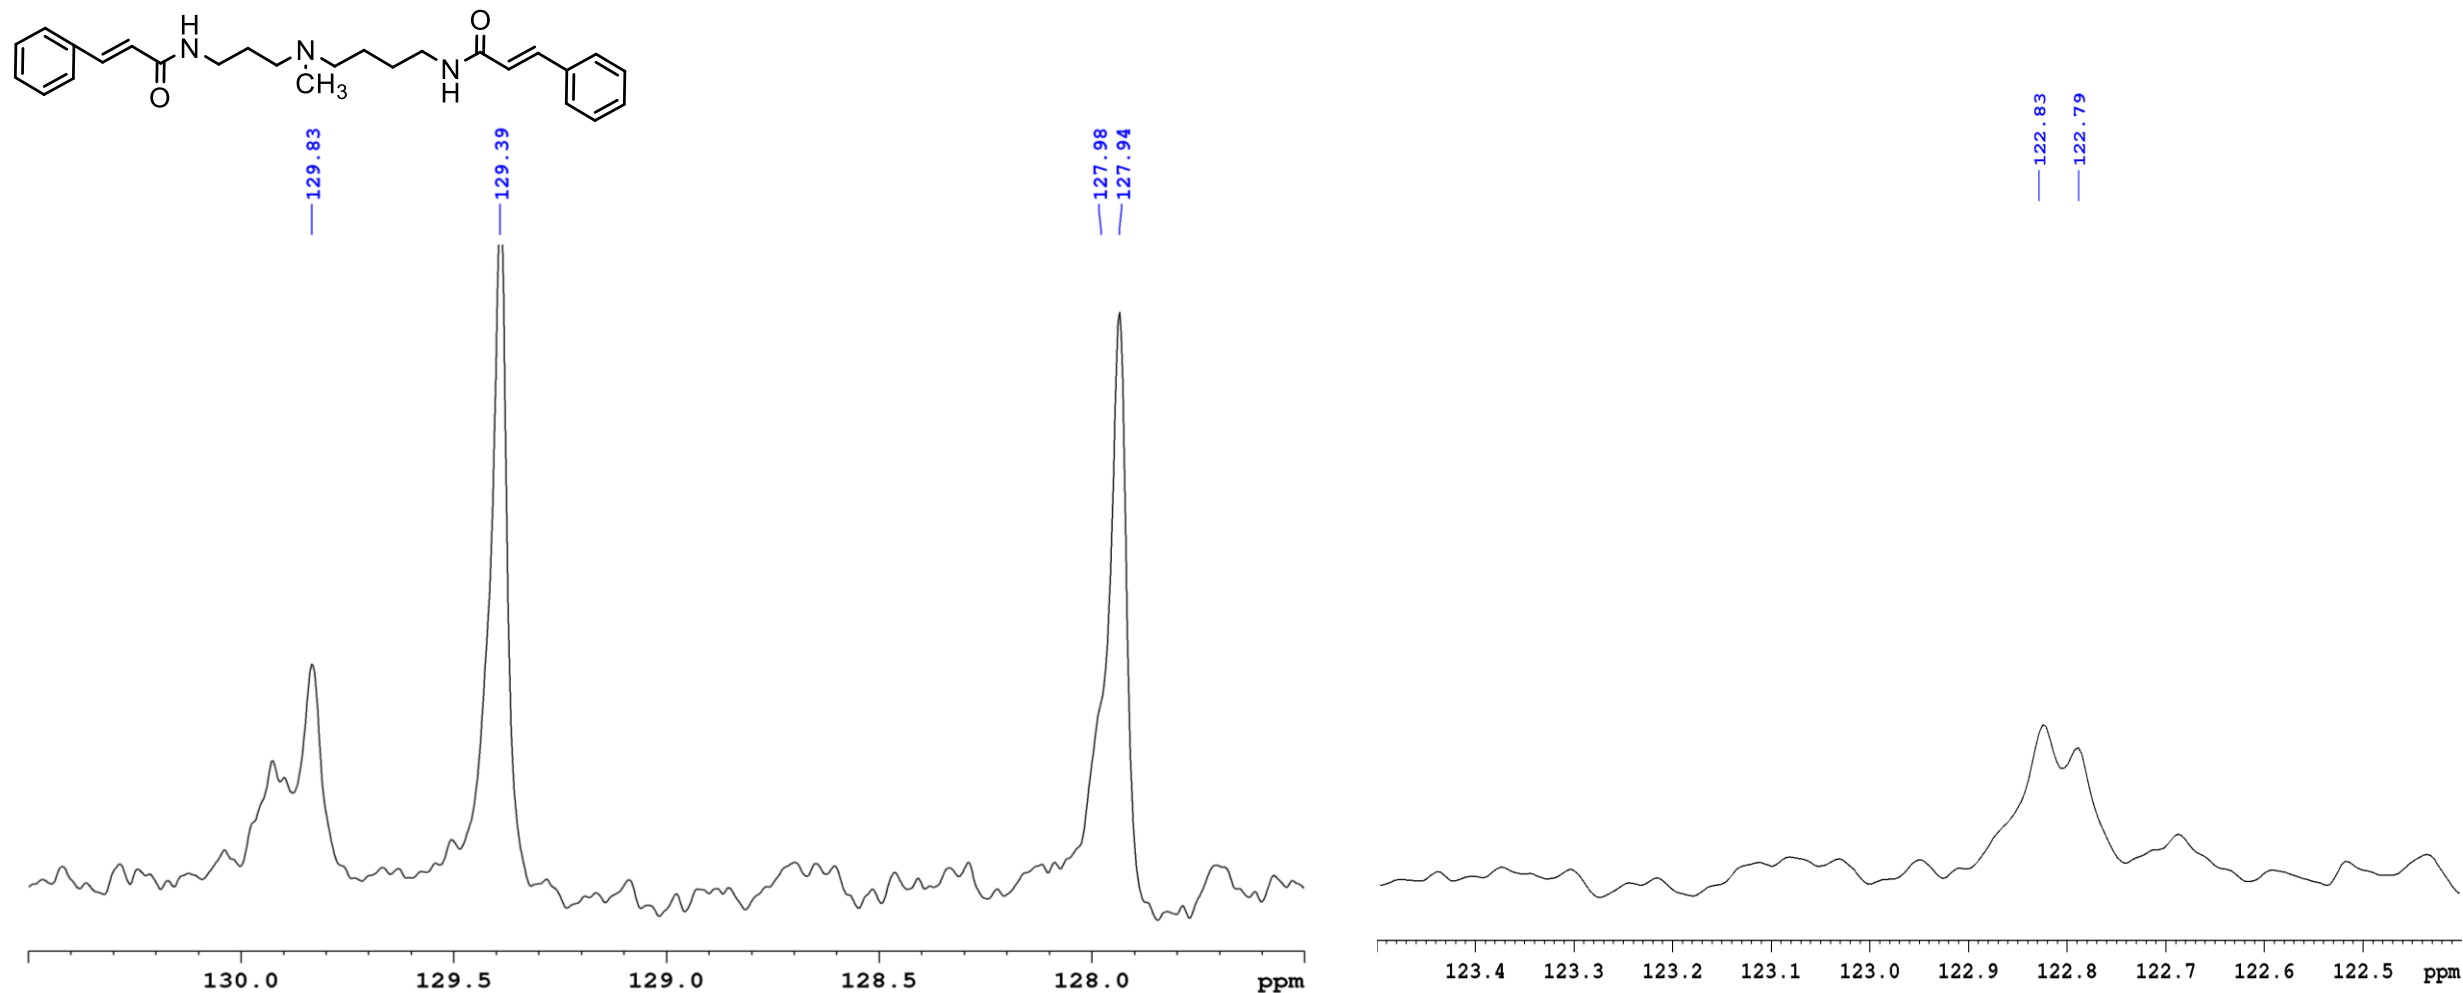

**Figure S30:** Expanded regions of the  $^{13}\text{C}$  NMR spectrum (125 MHz, DMSO  $\text{d}_6$ , TMS) of 5-N-methylmaytenine.

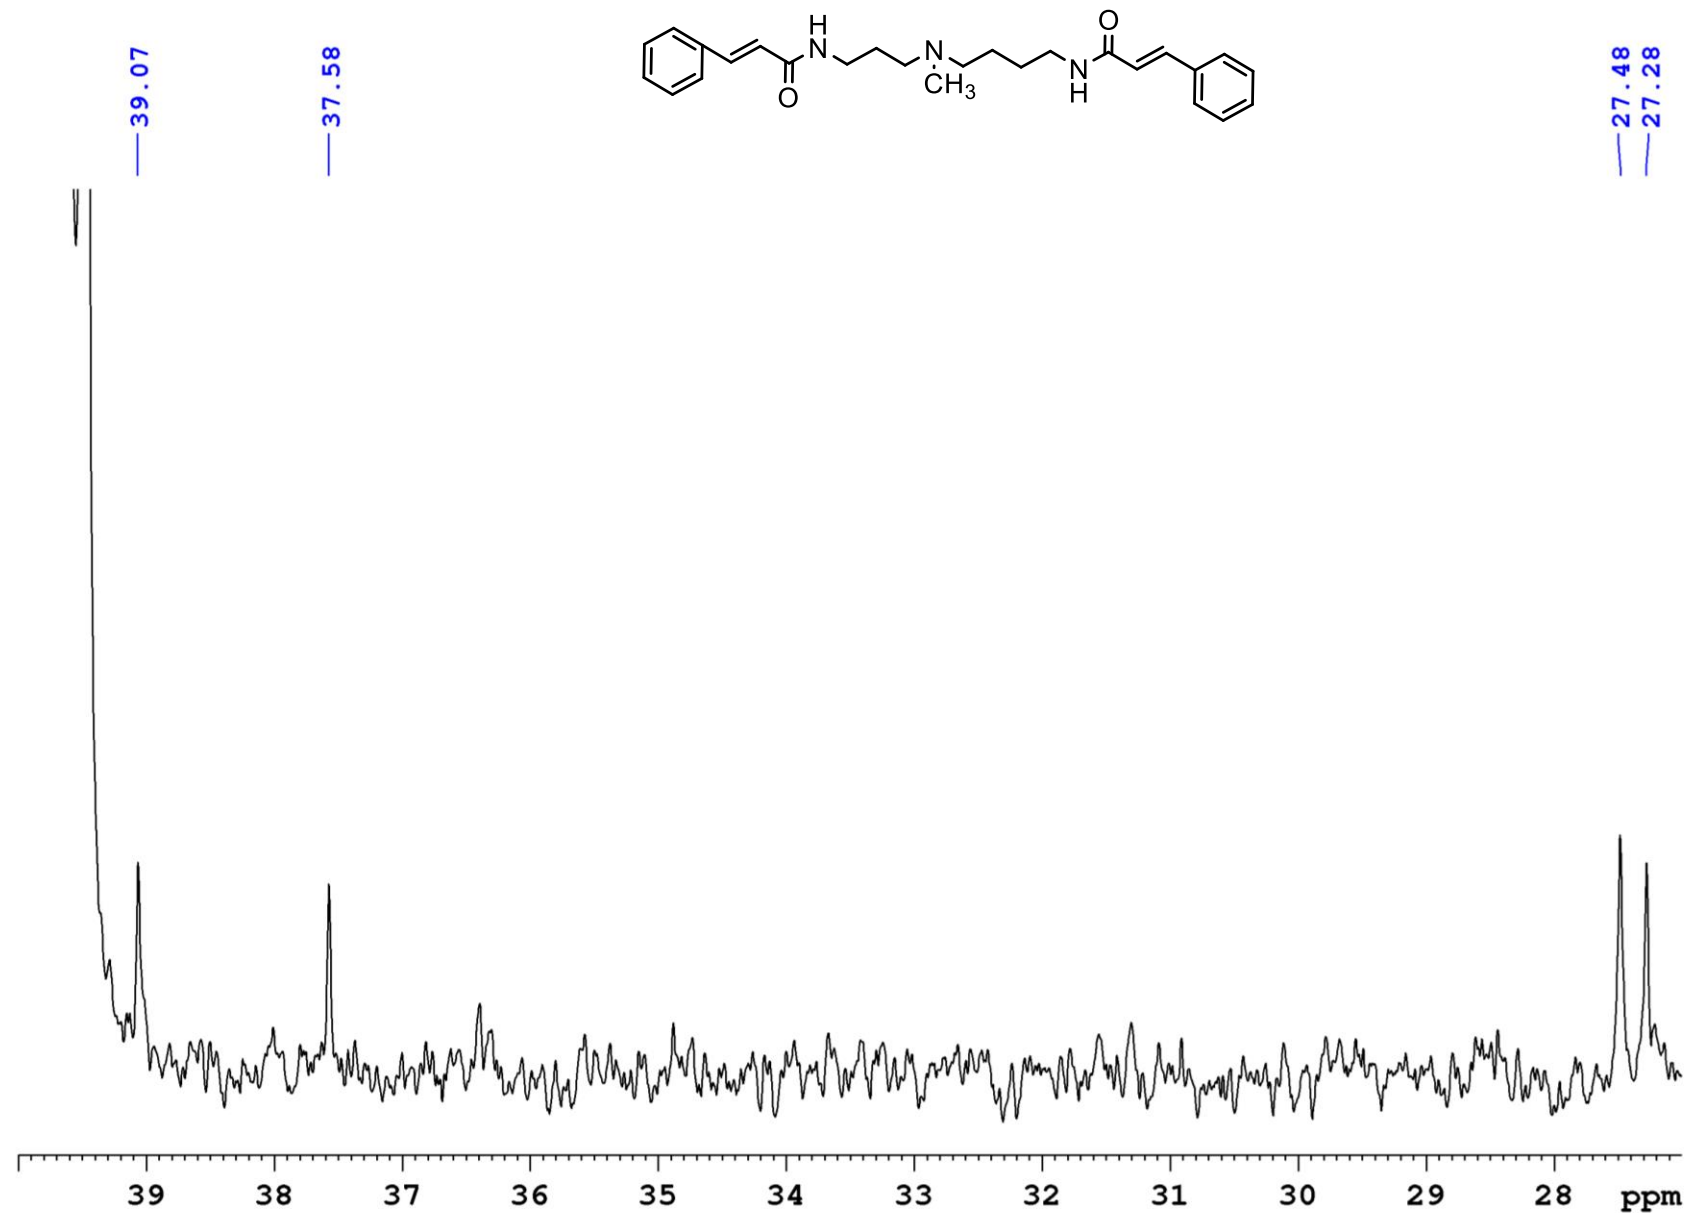

**Figure S31: Expanded region of the  $^{13}\text{C}$  NMR spectrum (125 MHz, DMSO  $d_6$ , TMS) of 5-N-methylmaytenine.**

## Current Data Parameters

NAME  
EXPNO 300  
PROCNO 1

## F2 - Acquisition Parameters

Date  
Time 5.23 h  
INSTRUM spect  
PROBHD Z119470\_0223 (  
PULPROG hmbcgp1pndqf  
TD 2048  
SOLVENT DMSO  
NS 52  
DS 16  
SWH 5980.861 Hz  
FIDRES 2.920342 Hz  
AQ 0.1712128 sec  
RG 187.25  
DW 83.600 usec  
DE 10.00 usec  
TE 298.1 K  
CNST2 145.0000000  
CNST13 8.0000000  
D0 0.00000300 sec  
D1 1.00000000 sec  
D2 0.00344828 sec  
D6 0.06250000 sec  
D16 0.00020000 sec  
IN0 0.00001660 sec  
TDav 1  
SFO1 500.1325072 MHz  
NUC1 1H  
P1 9.40 usec  
P2 18.80 usec  
PLW1 20.32299995 W  
SFO2 125.7716219 MHz  
NUC2 13C  
P3 10.00 usec  
PLW2 88.00000000 W  
GPNAM[1] SMSQ10.100  
GPZ1 50.00 %  
GPNAM[2] SMSQ10.100  
GPZ2 30.00 %  
GPNAM[3] SMSQ10.100  
GPZ3 40.10 %  
P16 1000.00 usec

## F1 - Acquisition parameters

TD 235  
SFO1 125.7716 MHz  
FIDRES 256.344513 Hz  
SW 239.486 ppm  
FnMODE QF

## F2 - Processing parameters

SI 4096  
SF 500.1300000 MHz  
WDW SINE  
SSB 0  
LB 0 Hz  
GB 0  
PC 1.40

## F1 - Processing parameters

SI 1024  
MC2 QF  
SF 125.7577885 MHz  
WDW SINE  
SSB 0  
LB 0 Hz  
GB 0

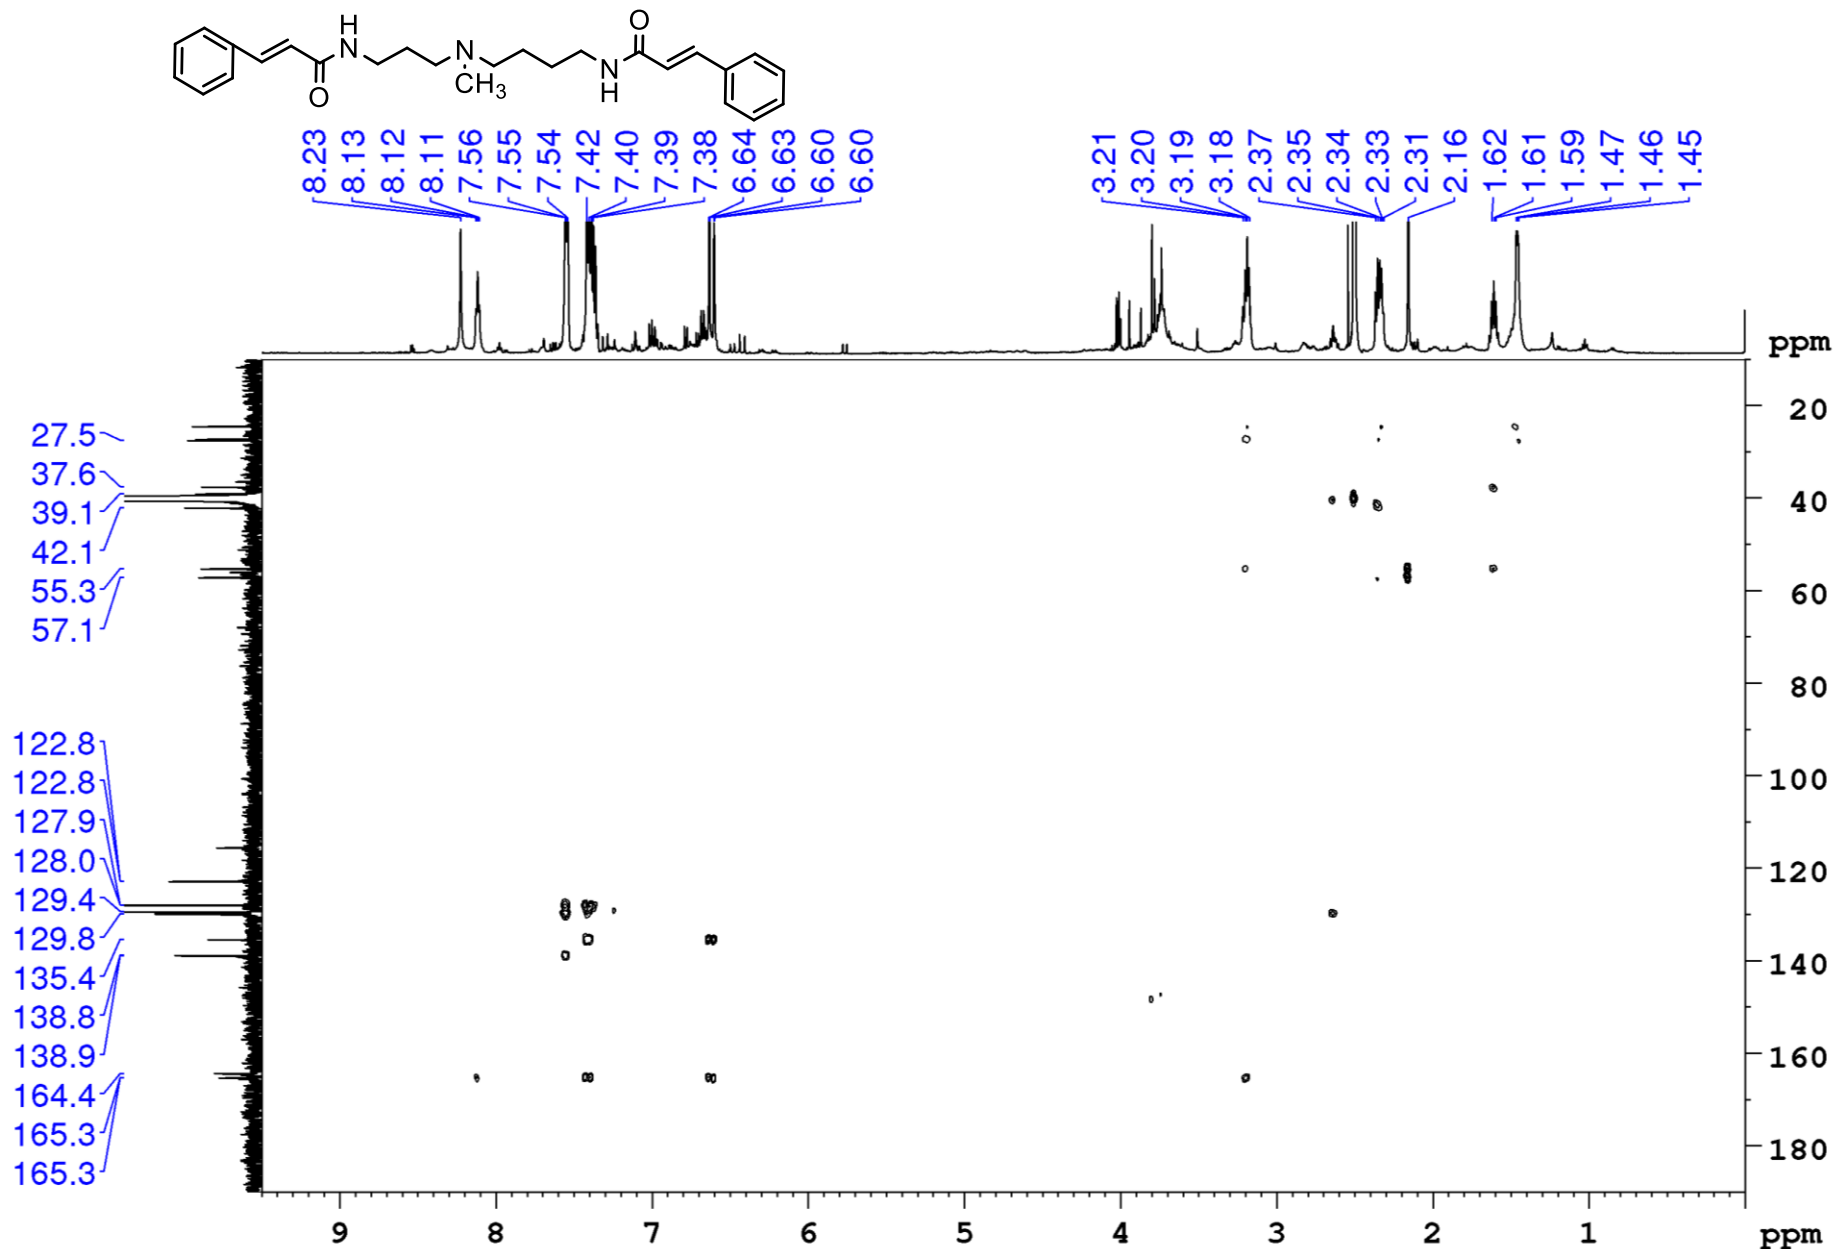

Figure S32: HMBC spectrum (125 MHz, DMSO d<sub>6</sub>, TMS) of 5-N-methylmaytenine.

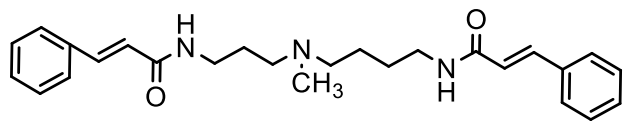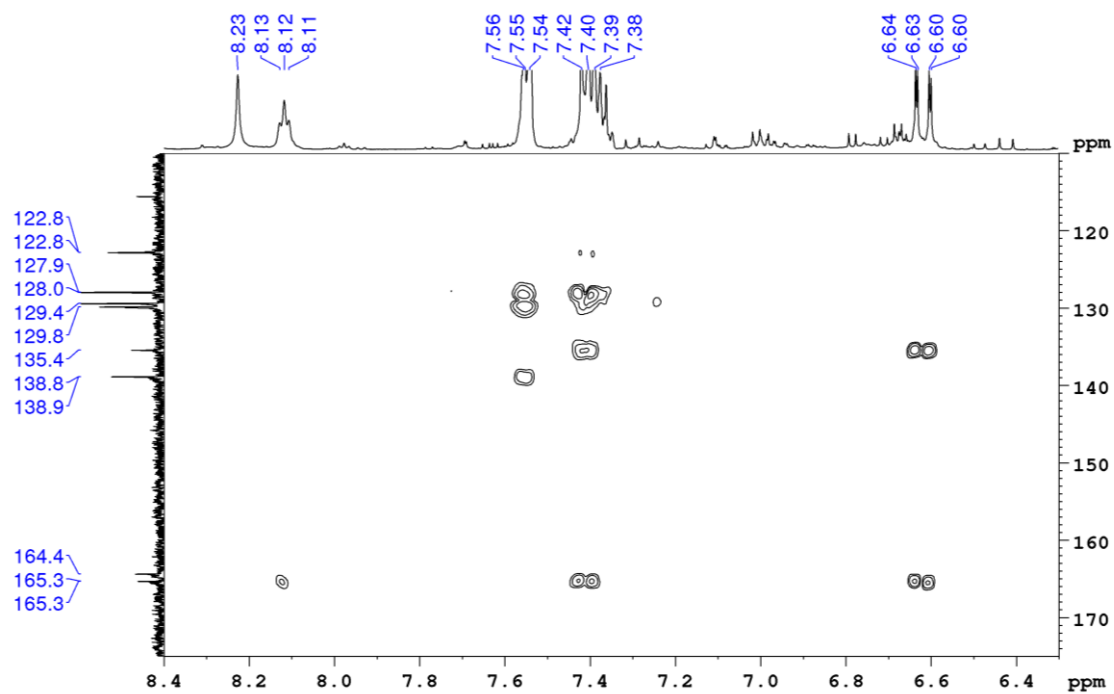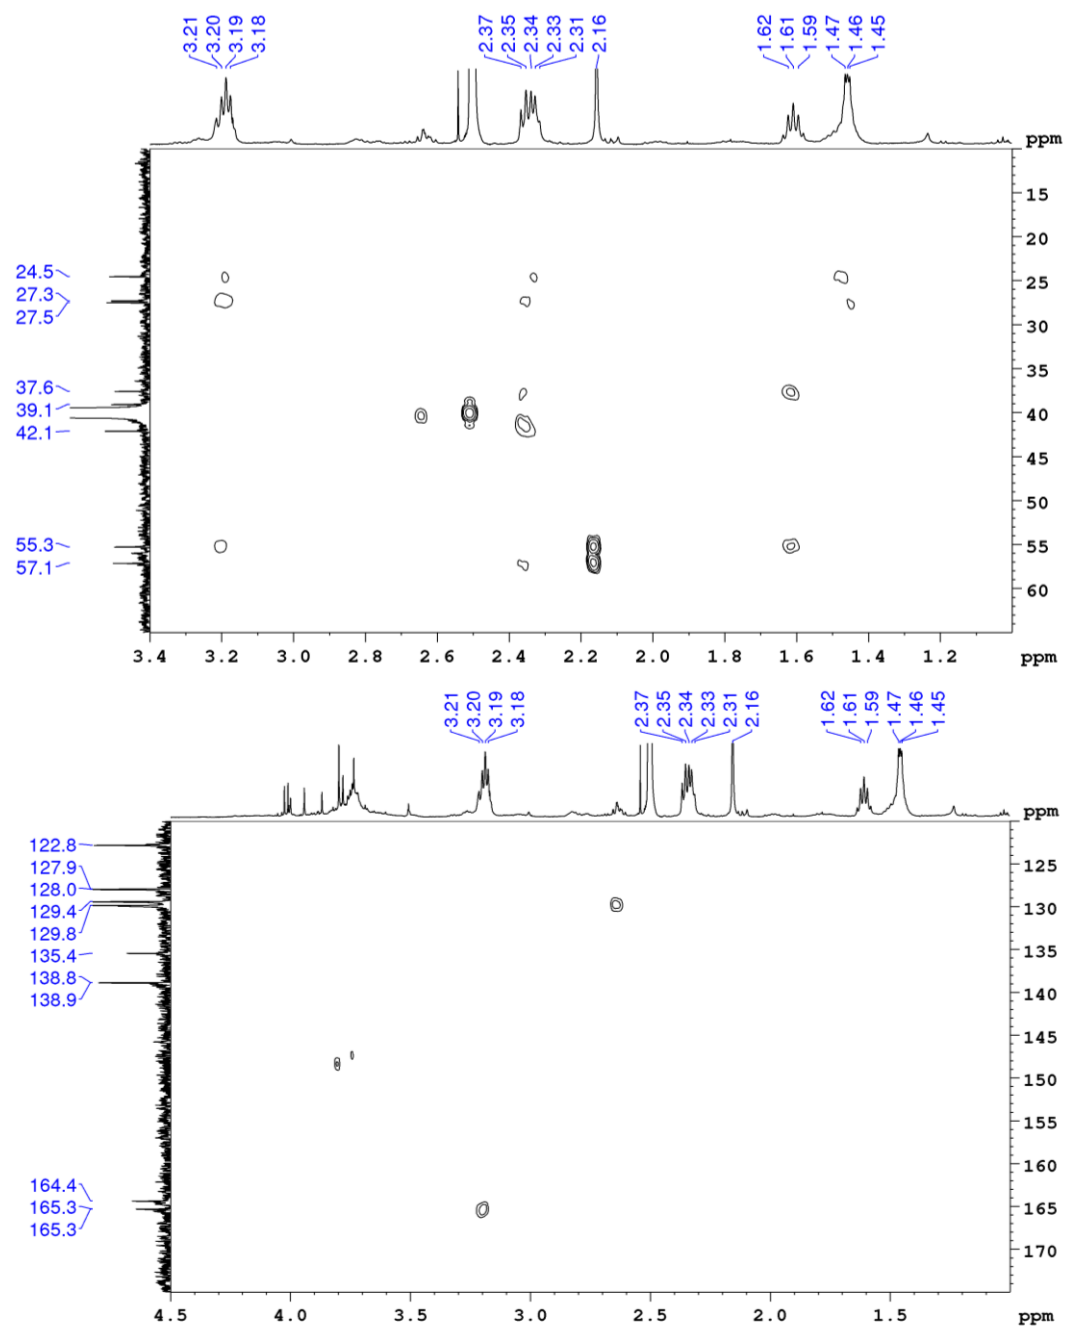

**Figure S33: Expanded regions of the HMBC spectrum (125 MHz, DMSO d<sub>6</sub>, TMS) of 5-*N*-methylmaytenine.**

Current Data Parameters  
NAME  
EXPNO 200  
PROCNO 1

F2 - Acquisition Parameters  
Date  
Time 1.17 h  
INSTRUM spect  
PROBHD z119470\_0223 f  
PULPROG hscqtgpsi2.2  
TD 2048  
SOLVENT DMSO  
NS 48  
DS 16  
SWH 5980.861 Hz  
FIDRES 2.920342 Hz  
AQ 0.1712128 sec  
RG 187.25  
DW 83.600 usec  
DE 10.00 usec  
TE 298.2 K  
CNST2 145.0000000  
CNST17 -0.5000000  
D0 0.00000300 sec  
D1 1.00000000 sec  
D4 0.00172414 sec  
D11 0.03000000 sec  
D16 0.00020000 sec  
D24 0.00089000 sec  
IN0 0.00001850 sec  
TDav 1  
SFO1 500.1325072 MHz  
NUC1 1H  
P1 9.40 usec  
P2 18.80 usec  
P28 1000.00 usec  
PLW1 20.32299995 W  
SFO2 125.7703643 MHz  
NUC2 13C  
CPDPRG[2] garp  
P3 10.00 usec  
P14 500.00 usec  
P24 2000.00 usec  
PCPD2 70.00 usec  
PLW0 0 W  
PLW2 88.00000000 W  
PLW12 1.78668594 W  
SPNAM[3] Crp60,0.5,20.1  
SFOAL3 0.500  
SPOFFS3 0 Hz  
SPW3 13.44499969 W  
SPNAM[7] Crp60comp.4  
SFOAL7 0.500  
SPOFFS7 0 Hz  
SPW7 13.44499969 W  
GPNAM[1] SMSQ10.100  
GPZ1 80.00 %  
GPNAM[2] SMSQ10.100  
GPZ2 20.10 %  
GPNAM[3] SMSQ10.100  
GPZ3 11.00 %  
GPNAM[4] SMSQ10.100  
GPZ4 -5.00 %  
P16 1000.00 usec  
P19 600.00 usec

F1 - Acquisition parameters  
TD 256  
SFO1 125.7704 MHz  
FIDRES 211.148651 Hz  
SW 214.892 ppm  
FnMODE Echo-Antiecho

F2 - Processing parameters  
SI 4096  
SF 500.1300000 MHz  
WDW QSINE  
SSB 2  
LB 0 Hz  
GB 0  
PC 1.40

F1 - Processing parameters  
SI 1024  
MC2 echo-antiecho  
SF 125.7577867 MHz  
WDW QSINE  
SSB 2  
LB 0 Hz  
GB 0

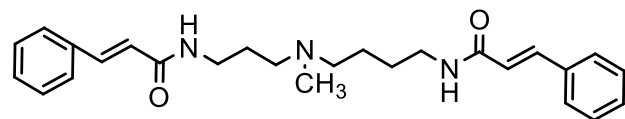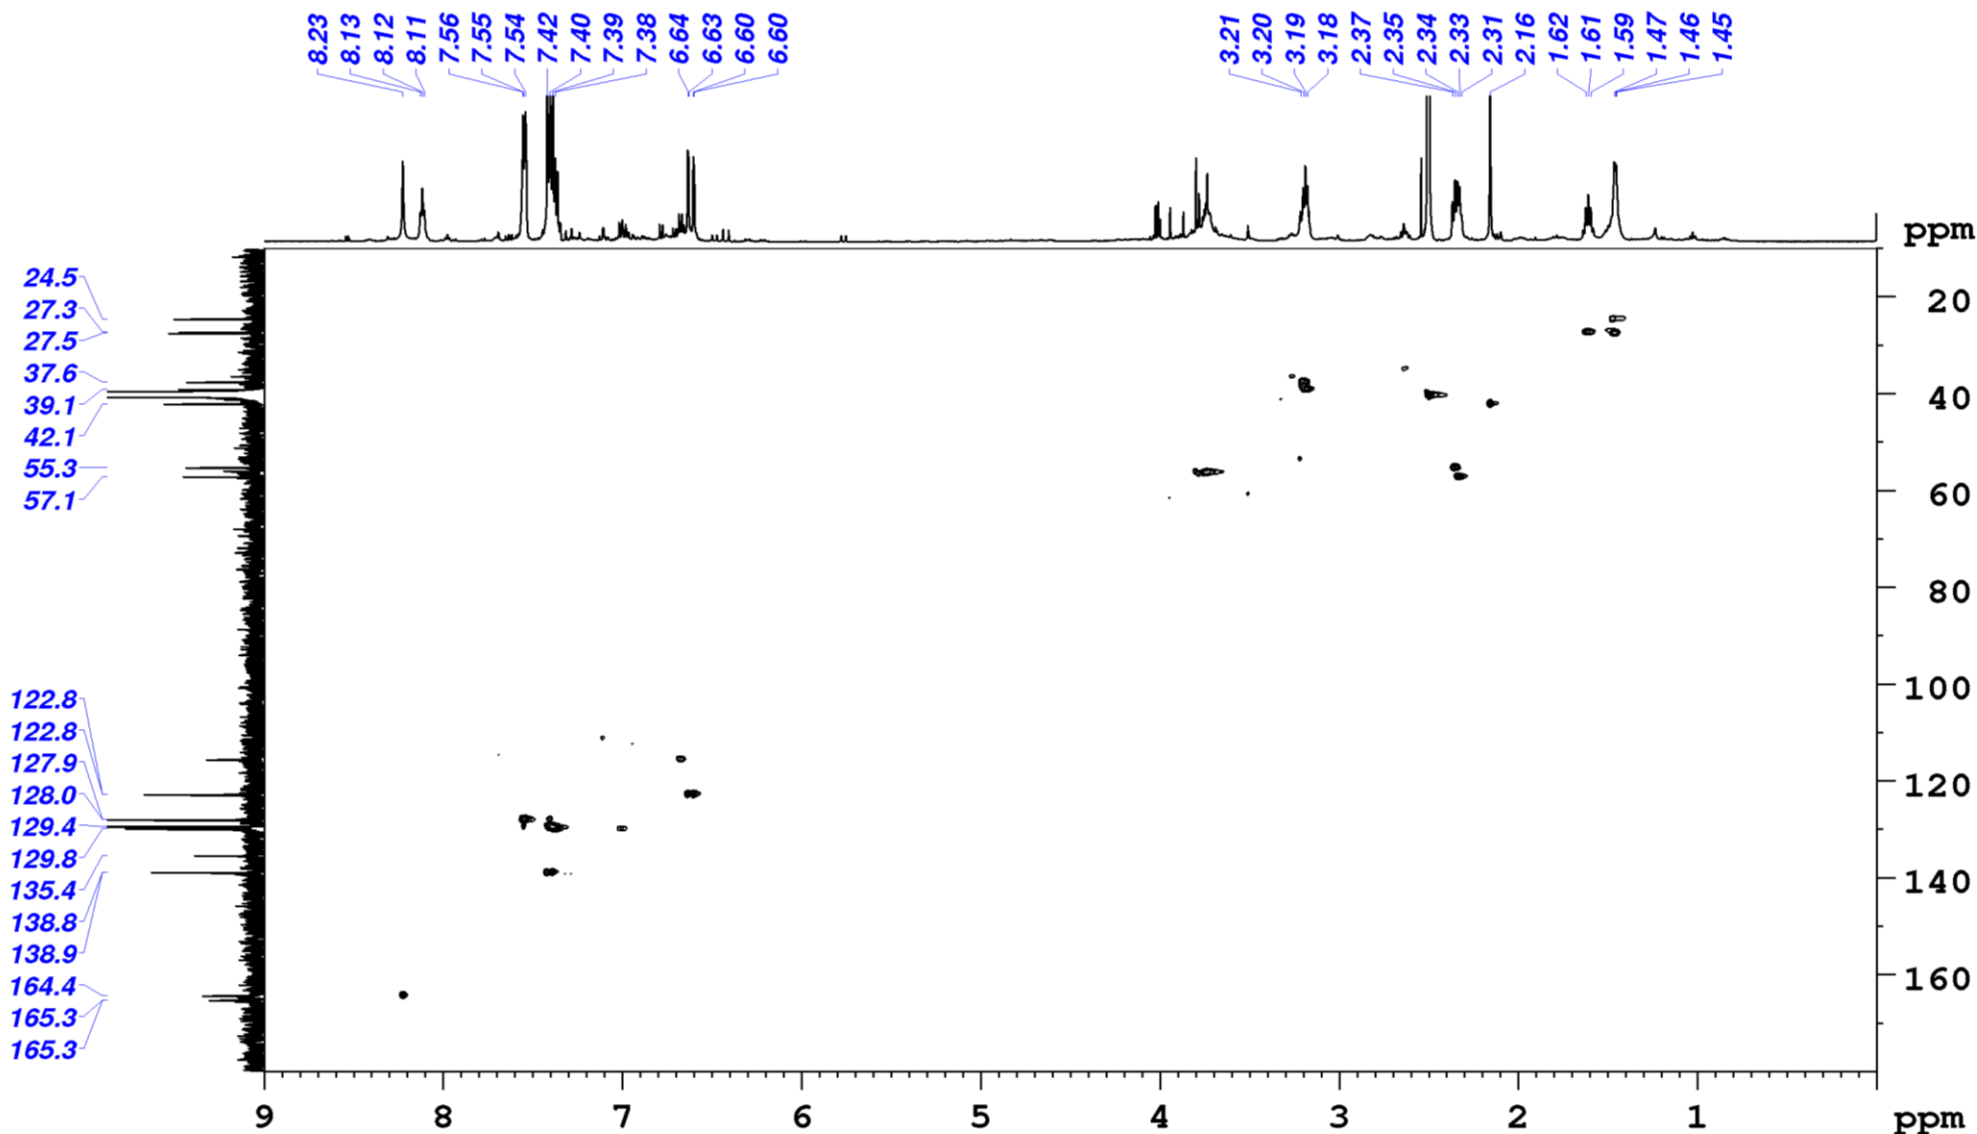

Figure S34: HSQC spectrum (125 MHz, DMSO  $d_6$ , TMS) of 5-N-methylmaytenine.

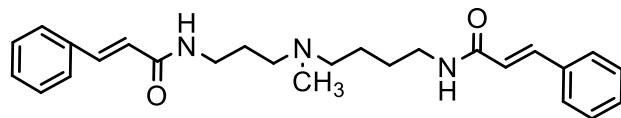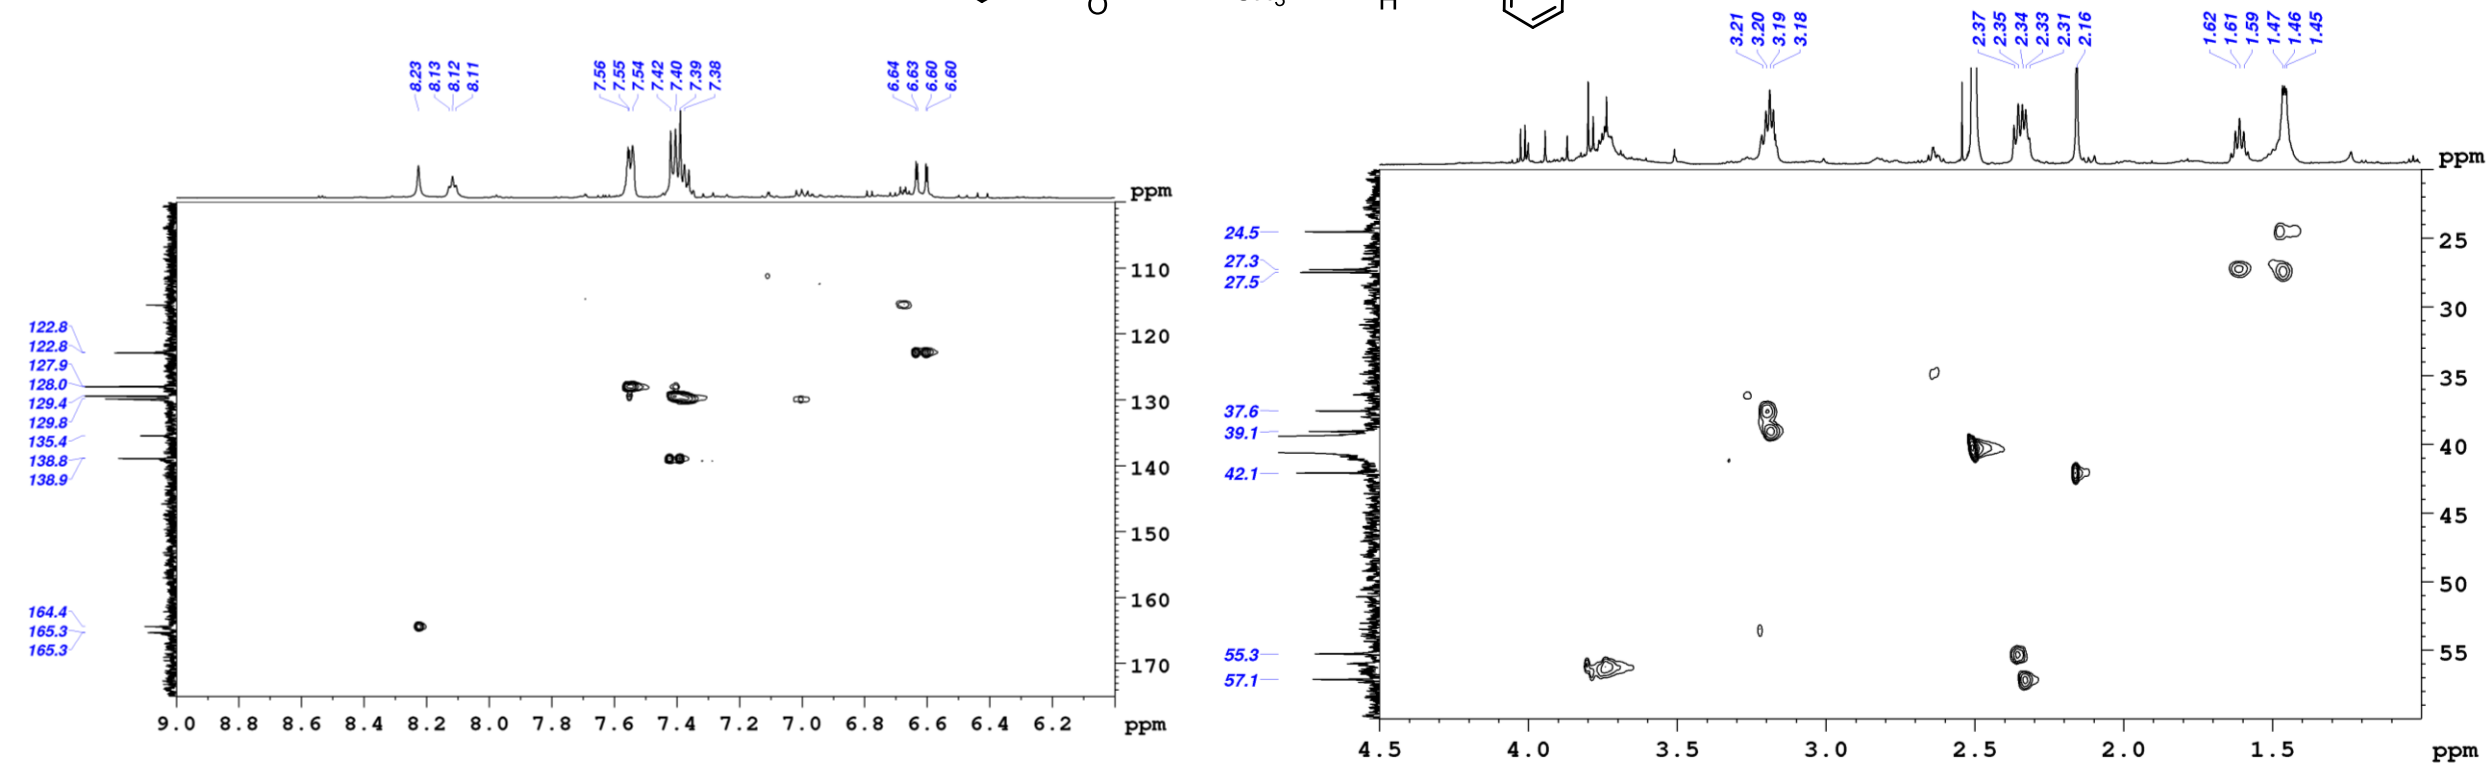

**Figure S35: Expanded regions of the HSQC spectrum (125 MHz, DMSO  $d_6$ , TMS) of 5-N-methylmaytenine.**

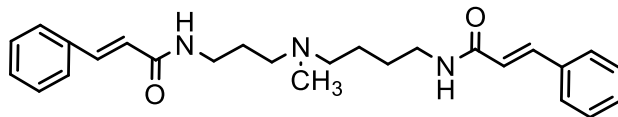

Current Data Parameters  
NAME  
EXPNO 3  
PROCNO 1

F2 - Acquisition Parameters  
Date  
Time 23.25 h  
INSTRUM spect  
PROBHD z119470\_0223 (PULPROG  
deptsp135  
TD 32768  
SOLVENT DMSO  
NS 2048  
DS 8  
SWH 29761.904 Hz  
FIDRES 0.908261 Hz  
AQ 0.5505024 sec  
RG 187.25  
DW 16.800 usec  
DE 10.00 usec  
TE 298.2 K  
CNST2 145.0000000  
D1 2.00000000 sec  
D2 0.00344828 sec  
D12 0.00002000 sec  
TD0 1  
SFO1 125.7716219 MHz  
NUC1 13C  
P1 10.00 usec  
P13 2000.00 usec  
PLW0 0 W  
PLW1 88.00000000 W  
SPNAM[5] Crp60comp.4  
SFOAL5 0.500  
SPOFFS5 0 Hz  
SPW5 13.44499969 W  
SFO2 500.1320005 MHz  
NUC2 1H  
CPDPRG[2] waltz16  
P3 9.40 usec  
P4 18.80 usec  
PCPD2 80.00 usec  
PLW2 20.32299995 W  
PLW12 0.28058001 W

F2 - Processing parameters  
SI 65536  
SF 125.7577885 MHz  
WDW EM  
SSB 0  
LB 3.00 Hz  
GB 0  
PC 1.40

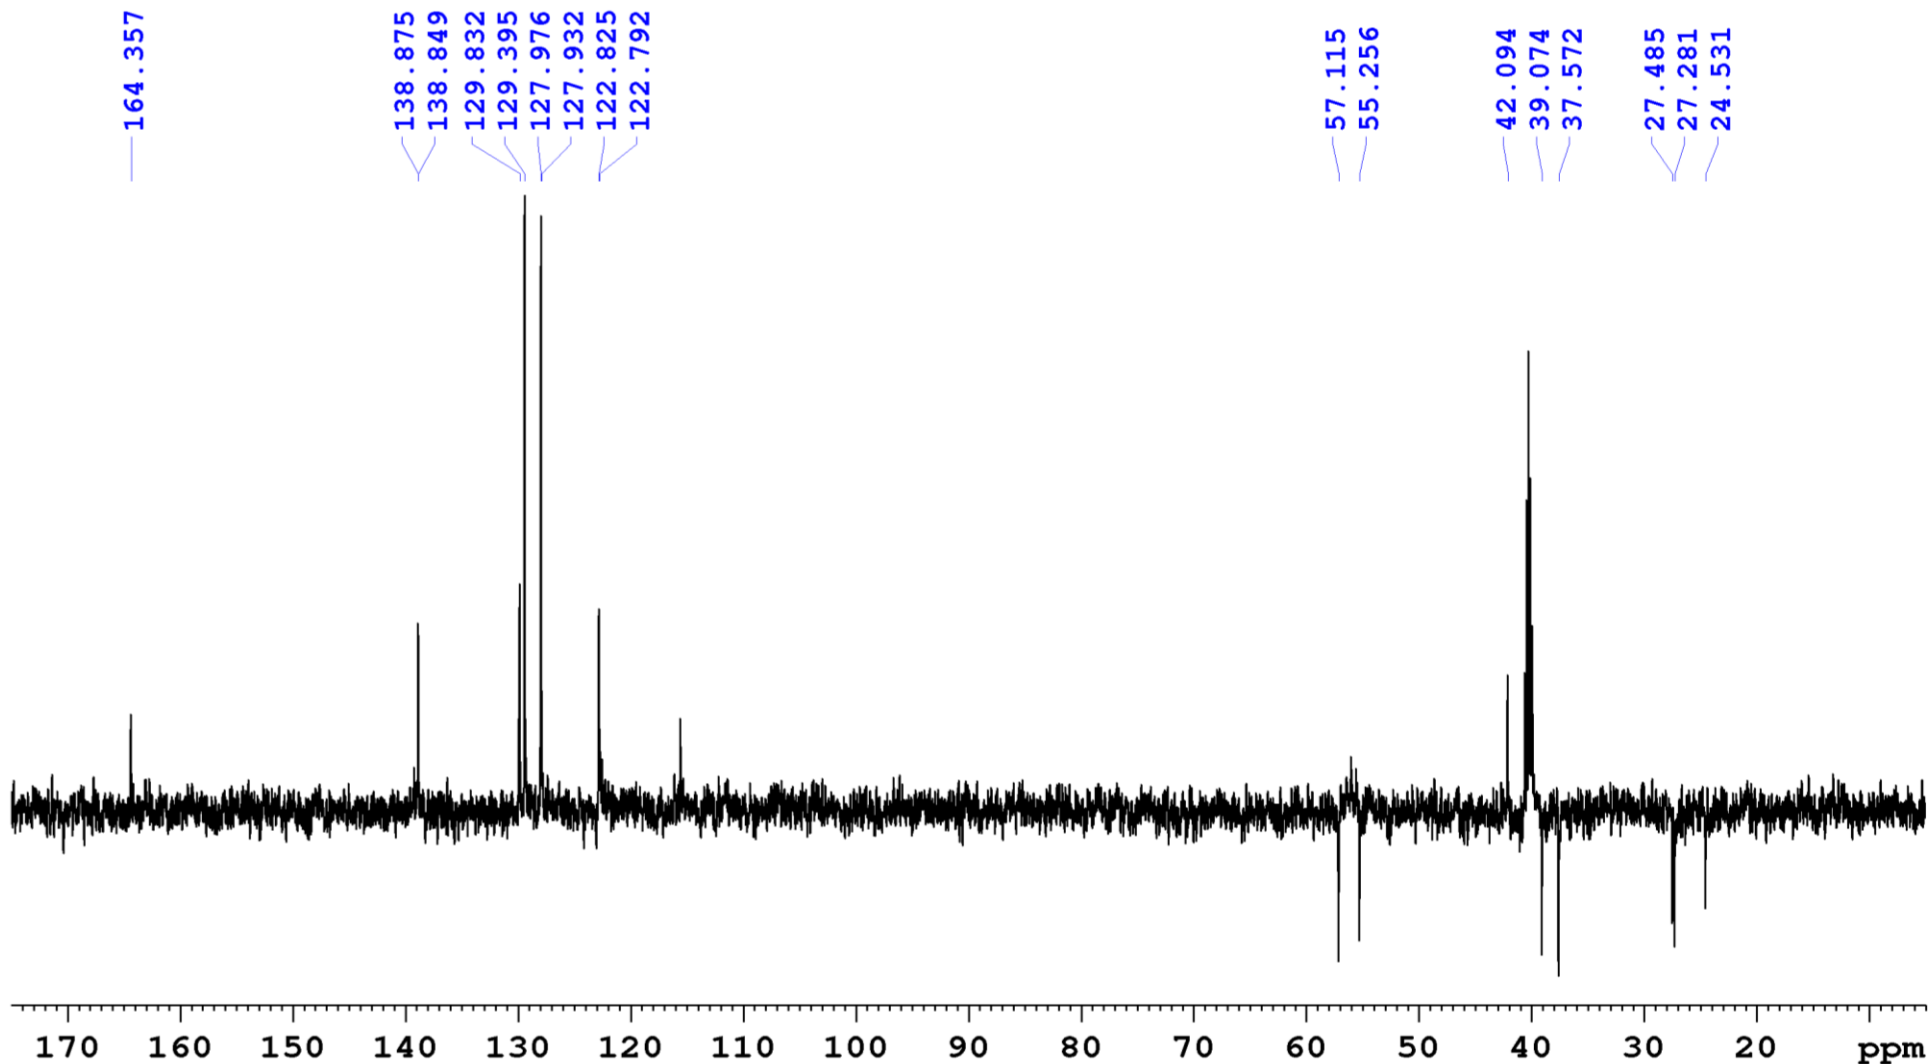

Figure S36: DEPT-135° spectrum (125 MHz, DMSO d<sub>6</sub>, TMS) of 5-N-methylmaytenine.

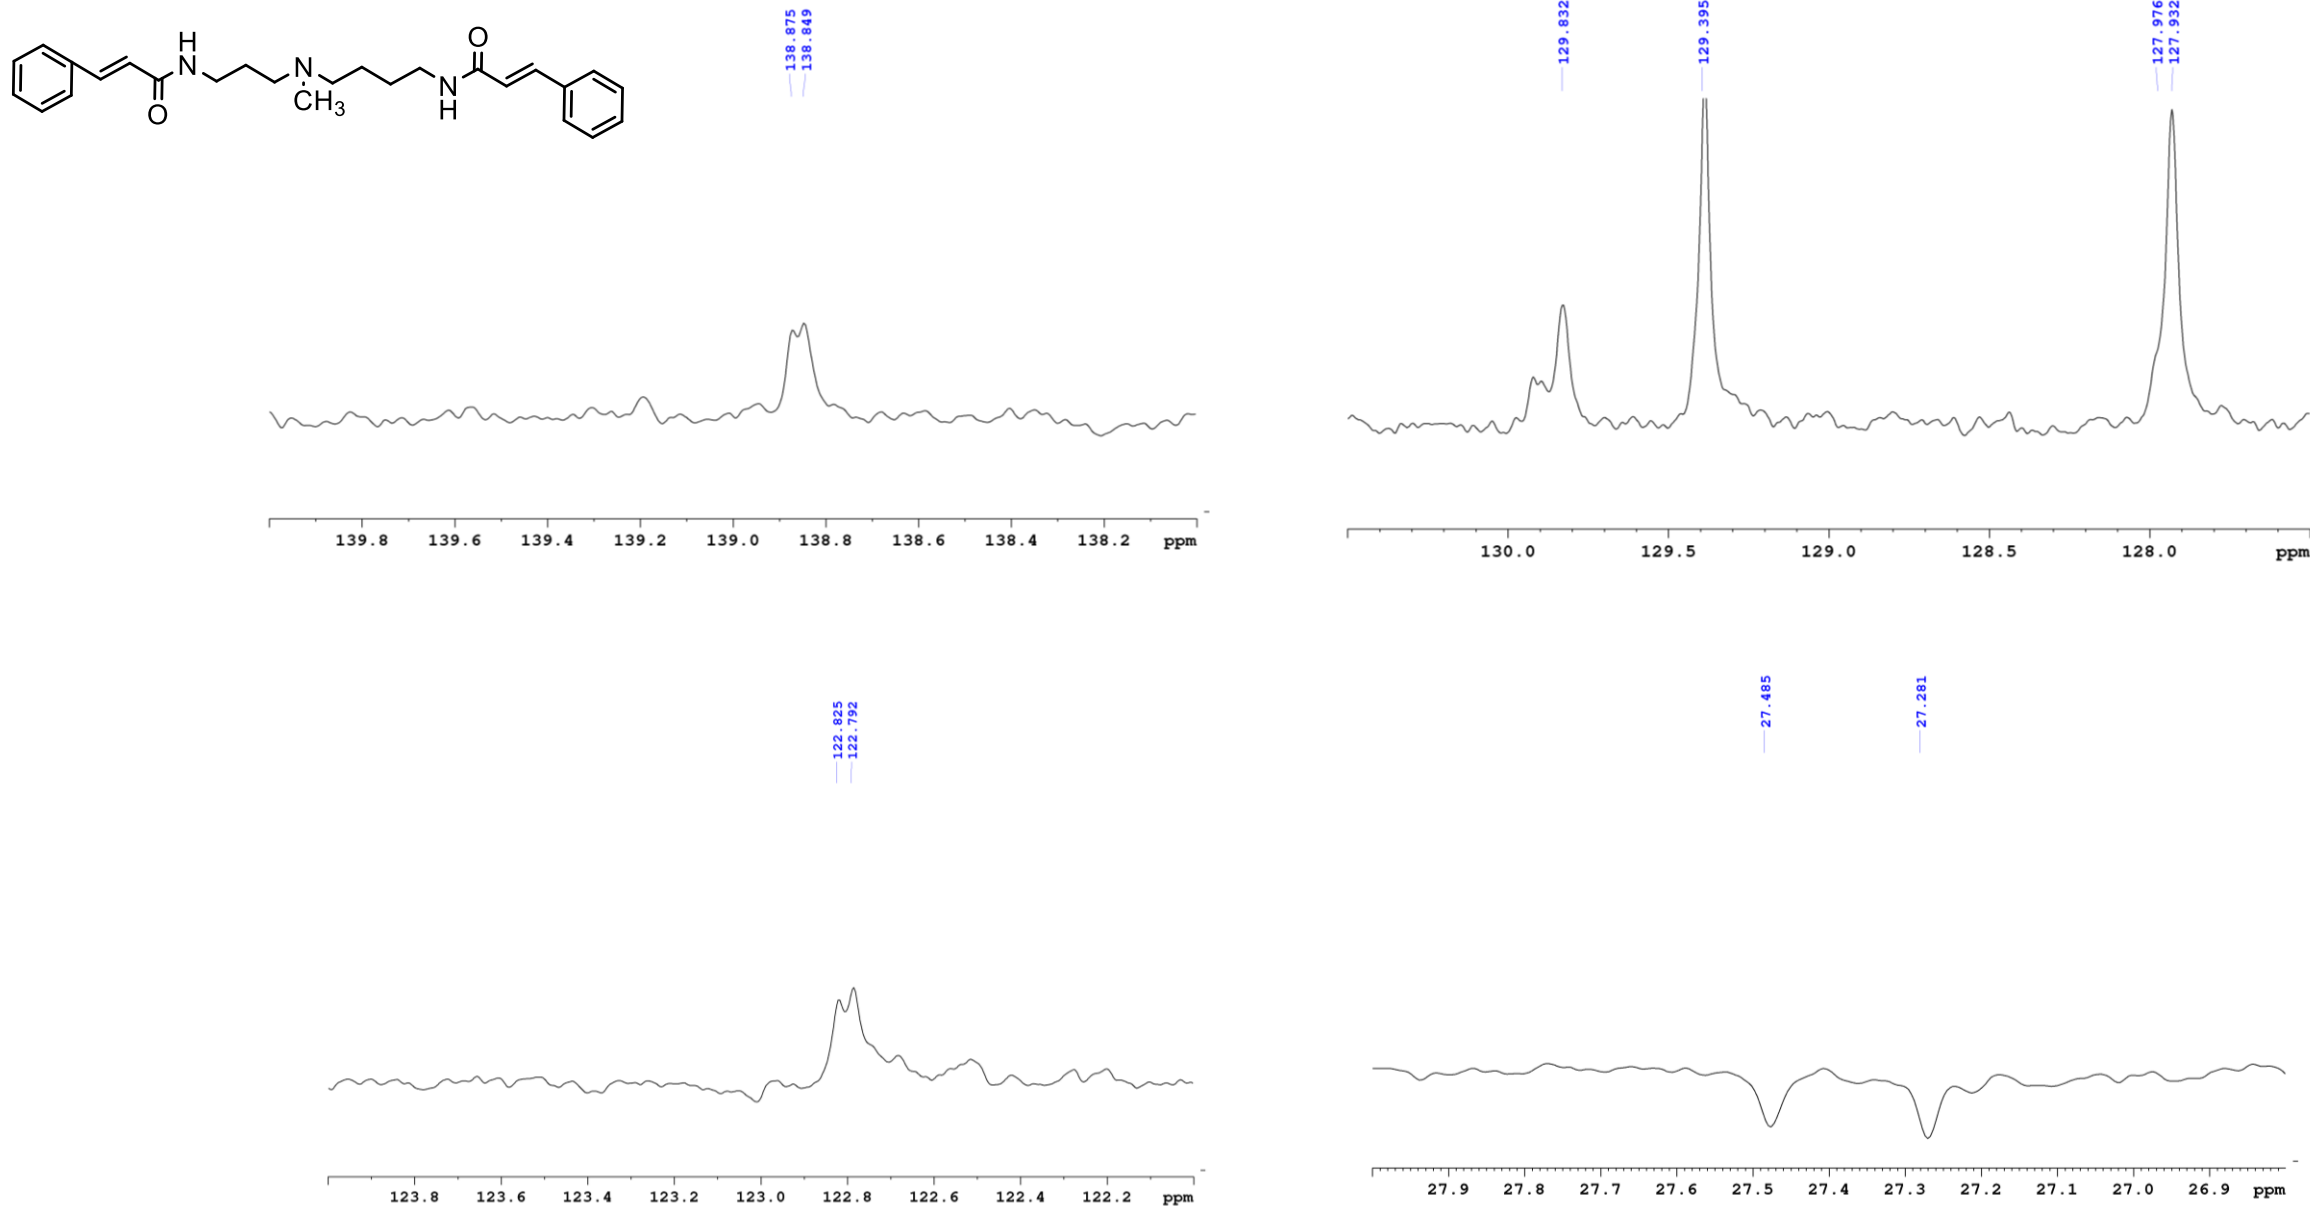

**Figure S37: Expanded regions of the DEPT-135° spectrum (125 MHz, DMSO d<sub>6</sub>, TMS) of 5-N-methylmaytenine.**



**Table S4: NMR chemical shifts of 5-*N*-methylmaitenine.** The experiments were realized in DMSO  $d_6$  at magnetic field strength of 11.7 T; 500 MHz for  $^1\text{H}$  and 125 MHz for  $^{13}\text{C}$  NMR;

s: singlet; d: doublet; t: triplet; m: multiplet.

| Position                 | $^1\text{H}$                                                 |                                                          | $^{13}\text{C}$           |                                                                    |
|--------------------------|--------------------------------------------------------------|----------------------------------------------------------|---------------------------|--------------------------------------------------------------------|
|                          | $\delta_{\text{H}}$ , ppm (multiplicity; number of H; J, Hz) | COSY, ppm                                                | $\delta_{\text{C}}$ , ppm | HMBC, ppm                                                          |
| 4' and 4''               | -                                                            | -                                                        | 135.43                    | -                                                                  |
| 1' or 1''                | -                                                            | -                                                        | 165.27                    | -                                                                  |
| 1'' or 1'                | -                                                            | -                                                        | 165.32                    | -                                                                  |
| 5' and 5'' or 9' and 9'' | 7.56 – 7.54 (m; 2H)                                          | H-3'; H-7';<br>H-3''; H-7''                              | 127.98                    | C-3'; C-3''; C-7'; C-7'';<br>C-9'; C-9'' or C-5'; C-5''            |
| 9' and 9'' or 5' and 5'' | 7.56 – 7.54 (m; 2H)                                          | H-3'; H-3'';<br>H-7'; H-7''                              | 127.94                    | C-3'; C-3''; C-7'; C-7'';<br>C-5'; C-5'' or C-9'; C-9''            |
| 6', 6'',<br>8' and 8''   | 7.56 – 7.54 (m; 4H)                                          | H-3'; H-3'';<br>H-7'; H-7''                              | 129.39                    | C-3'; C-3''; C-7'; C-7''                                           |
| 7' and 7''               | 7.40 (m; 2H)                                                 | H-5'; H-5''<br>H-6'; H-6''<br>H-9'; H-9''<br>H-2'; H-2'' | 129.83                    | C-5'; C-5''; C-9'; C-9''                                           |
| 3' or 3''                | 7.42 (m; 1H)                                                 | H-5'; H-5''<br>H-6'; H-6''<br>H-9'; H-9''<br>H-2'; H-2'' | 138.85                    | C-1'; C-1''; C-2'; C-2''; C-4';<br>C-4''; C-5'; C-5''; C-9'; C-9'' |
| 3'' or 3'                | 7.38 (m; 1H)                                                 | H-5'; H-5''<br>H-6'; H-6''<br>H-9'; H-9''                | 138.88                    | C-1'; C-1''; C-2'; C-2''; C-4';<br>C-4''; C-5'; C-5''; C-9'; C-9'' |
| 2' or 2''                | 6.63 (d; 1H; 16 Hz)                                          | H-3'; H-3''                                              | 122.79                    | C-1'; C-1''; C-4'; C-4''                                           |
| 2'' or 2'                | 6.60 (d; 1H; 16 Hz)                                          | H-3'; H-3''                                              | 122.83                    | C-1'; C-1''; C-4'; C-4''                                           |
| 1 and 10<br>N-H          | 8.12 (t; 5.5 Hz)                                             | H-2; H-9                                                 | -                         | C-1'; C-1''                                                        |
| 2                        | 3.20 (m; 2H)                                                 | H-3; -NH                                                 | 37.58                     | C-1'; C-1''; C-3; C-4                                              |
| 9                        | 3.18 (m; 2H)                                                 | H-8; -NH                                                 | 39.07                     | C-1'; C-1''; C-8                                                   |
| 4                        | 2.35 (m; 2H)                                                 | H-3                                                      | 55.26                     | C-2; C-3; C-5; C-6                                                 |
| 6                        | 2.32 (m; 2H)                                                 | H-7                                                      | 57.12                     | C-4; C-8                                                           |
| 5 N-CH <sub>3</sub>      | 2.16 (s; 3H)                                                 | -                                                        | 42.09                     | C-4; C-6                                                           |
| 3                        | 1.61 (m; 2H)                                                 | H-2; H-4                                                 | 27.28                     | C-4; C-2                                                           |
| 8                        | 1.47 (m; 2H)                                                 | H-9                                                      | 24.53                     | C-7                                                                |
| 7                        | 1.45 (m; 2H)                                                 | H-6                                                      | 27.48                     | C-8                                                                |

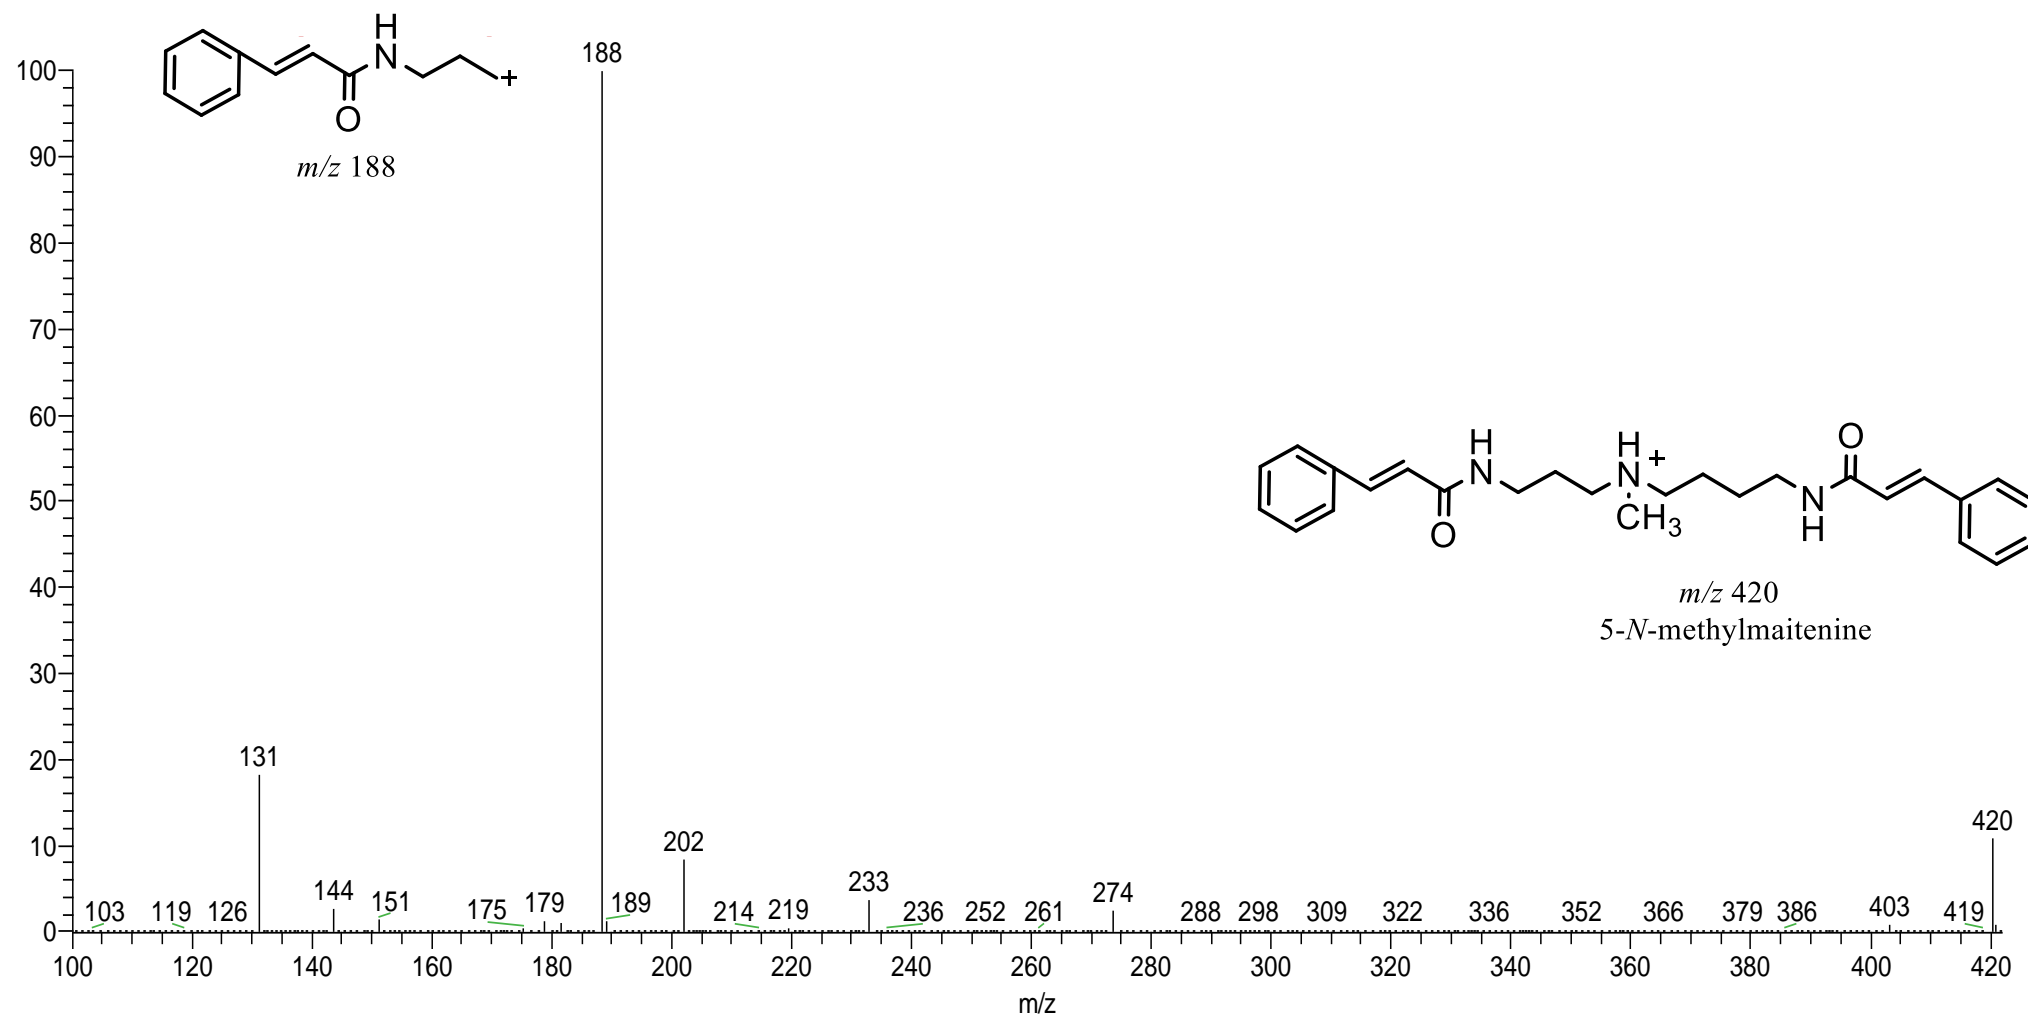

**Figure S38: Mass spectrum (MS/MS) of 5-N-methylmaytenine with chemical structure and identification of the main fragment ions.**

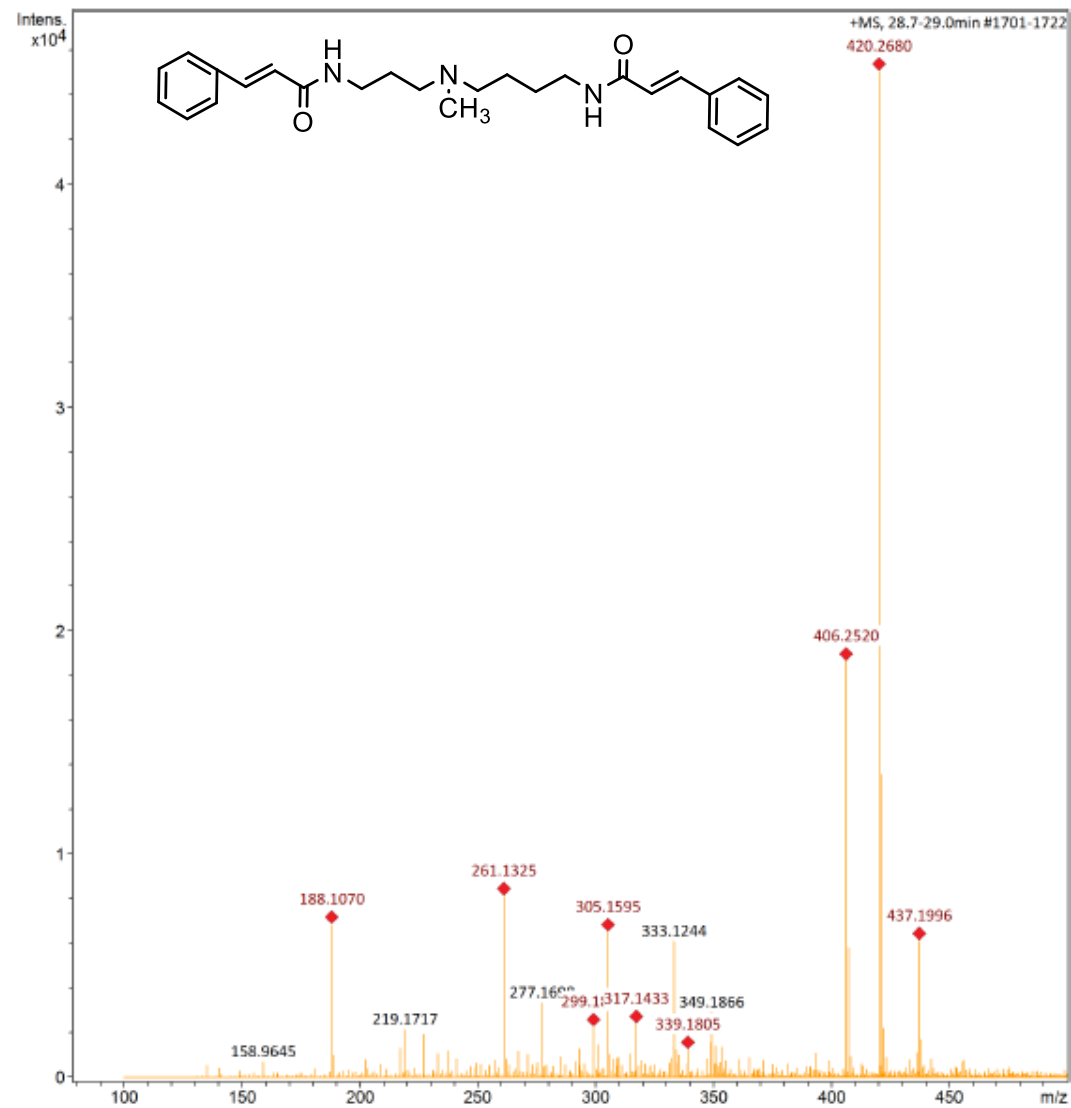

**Figure S39: High resolution mass-spectrum of 5-N-methylmaytenine with chemical structure.**

Current Data Parameters

NAME  
EXPNO 11  
PROCNO 1

F2 - Acquisition Parameters

Date  
Time 17.29 h  
INSTRUM spect  
PROBHD Z119470\_0223 (  
PULPROG zgpr  
TD 32768  
SOLVENT MeOD  
NS 32  
DS 2  
SWH 8012.820 Hz  
FIDRES 0.489064 Hz  
AQ 2.0447233 sec  
RG 147.17  
DW 62.400 usec  
DE 10.00 usec  
TE 298.1 K  
D1 2.00000000 sec  
D12 0.00002000 sec  
TD0 1  
SFO1 500.1324313 MHz  
NUC1 1H  
P1 10.30 usec  
PLW1 20.32299995 W  
PLW9 0.00008624 W

F2 - Processing parameters

SI 32768  
SF 500.1300116 MHz  
WDW EM  
SSB 0  
LB 0.30 Hz  
GB 0  
PC 1.00

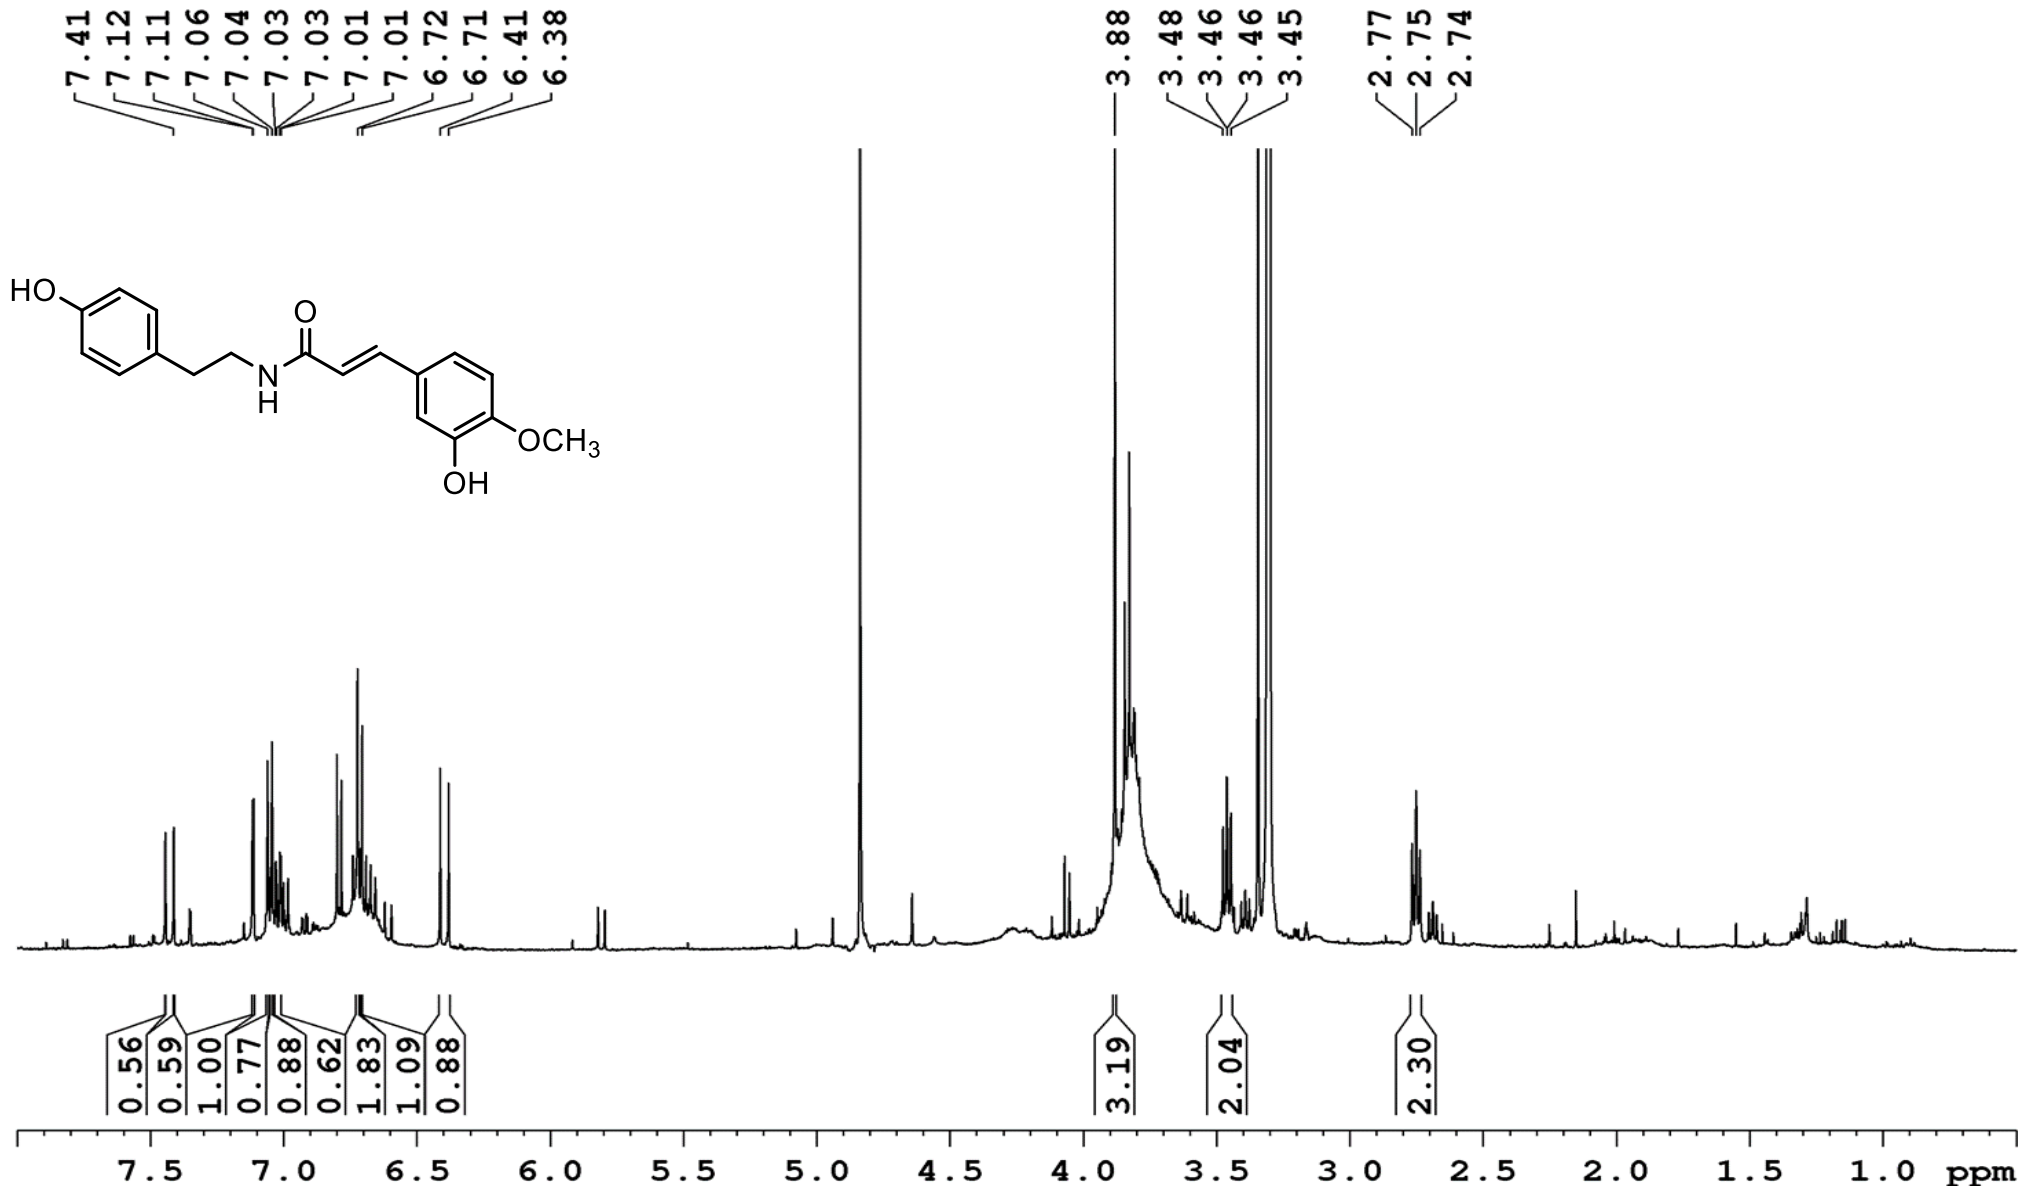

Figure S40:  $^1\text{H}$  NMR spectrum (500 MHz,  $\text{CD}_3\text{OD } d_6$ , TMS) of *N-trans*-feruloyltyramine.

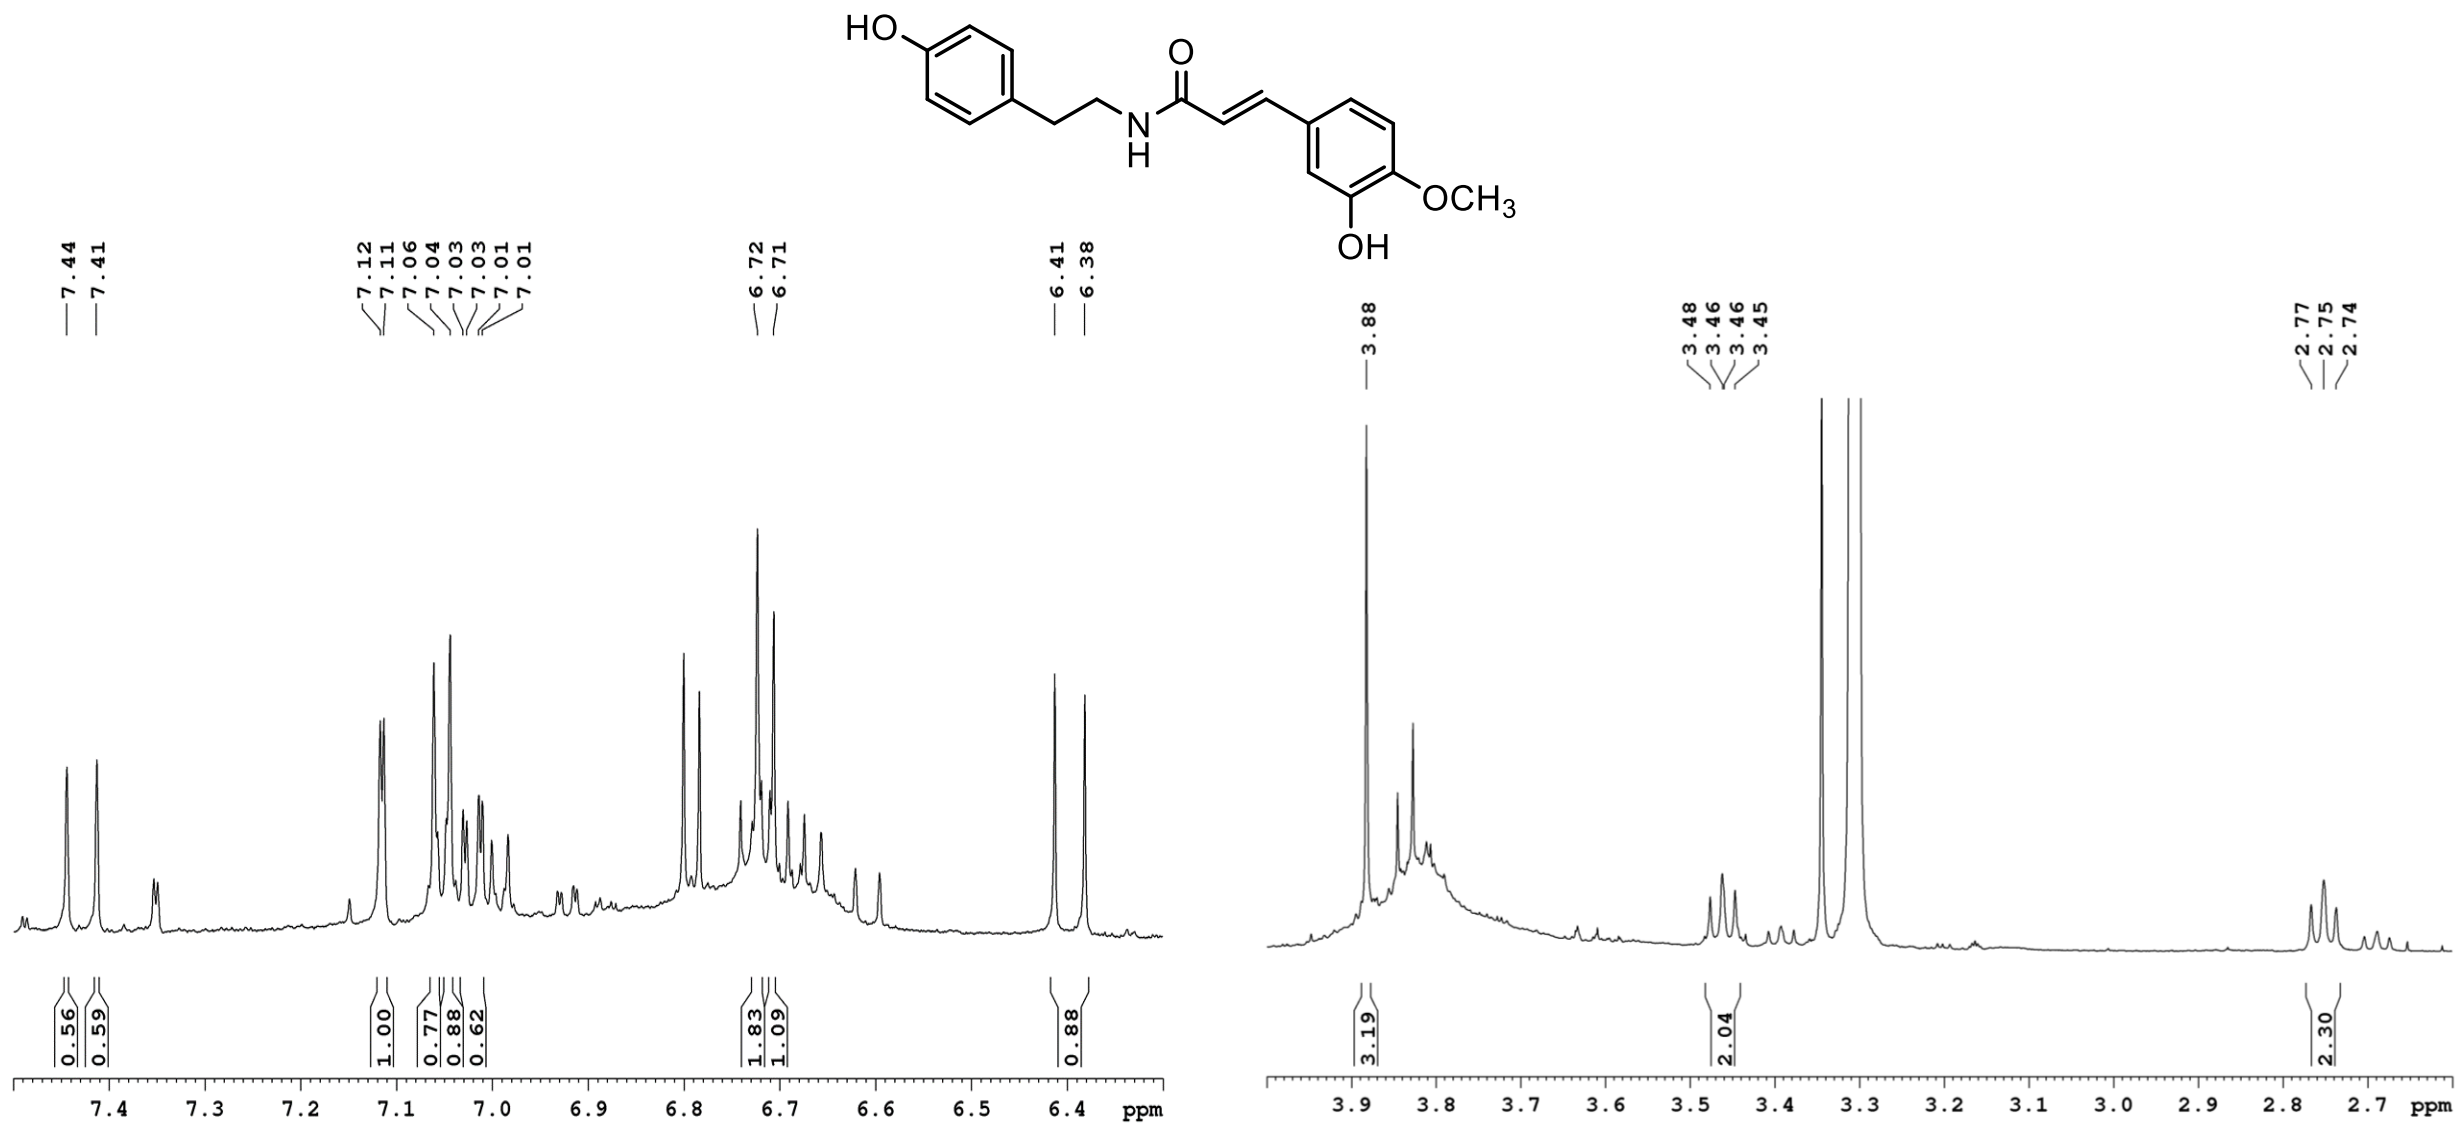

**Figure S41:** Expanded low-field region of the <sup>1</sup>H NMR spectrum (500 MHz, CD<sub>3</sub>OD d<sub>6</sub>, TMS) *N-trans*-feruloyltyramine.

Current Data Parameters  
 NAME  
 EXPNO 200  
 PROCNO 1

F2 - Acquisition Parameters

Date  
 Time 1.50 h  
 INSTRUM spect  
 PROBHD Z119470\_0223 (  
 PULPROG hsqcetgpsisp2.2  
 TD 2048  
 SOLVENT MeOD  
 NS 64  
 DS 16  
 SWH 10000.000 Hz  
 FIDRES 4.882813 Hz  
 AQ 0.1024000 sec  
 RG 187.25  
 DW 50.000 usec  
 DE 10.00 usec  
 TE 298.2 K  
 CNST2 145.0000000  
 CNST17 -0.5000000  
 D0 0.00000300 sec  
 D1 1.00000000 sec  
 D4 0.00172414 sec  
 D11 0.03000000 sec  
 D16 0.00020000 sec  
 D24 0.00089000 sec  
 IN0 0.00001850 sec  
 T Dav 1  
 SFO1 500.1330883 MHz  
 NUC1 1H  
 P1 9.40 usec  
 P2 18.80 usec  
 P28 1000.00 usec  
 PLW1 20.32299995 W  
 SFO2 125.7703643 MHz  
 NUC2 13C  
 CPDPRG[2] garp  
 P3 10.00 usec  
 P14 500.00 usec  
 P24 2000.00 usec  
 PCPD2 70.00 usec  
 PLW0 0 W  
 PLW2 88.00000000 W  
 PLW12 1.78668594 W  
 SPNAM[3] Crp60,0.5,20.1  
 SPOAL3 0.500  
 SPOFFS3 0 Hz  
 SPW3 13.44499969 W  
 SPNAM[7] Crp60comp.4  
 SPOAL7 0.500  
 SPOFFS7 0 Hz  
 SPW7 13.44499969 W  
 GPNAM[1] SMSQ10.100  
 GPZ1 80.00 %  
 GPNAM[2] SMSQ10.100  
 GPZ2 20.10 %  
 GPNAM[3] SMSQ10.100  
 GPZ3 11.00 %  
 GPNAM[4] SMSQ10.100  
 GPZ4 -5.00 %  
 P16 1000.00 usec  
 P19 600.00 usec

F1 - Acquisition parameters

TD 256  
 SFO1 125.7704 MHz  
 FIDRES 211.148651 Hz  
 SW 214.892 ppm  
 FnMODE Echo-Antiecho

F2 - Processing parameters

SI 4096  
 SF 500.1300105 MHz  
 WDW QSINE  
 SSB 2  
 LB 0 Hz  
 GB 0  
 PC 1.40

F1 - Processing parameters

SI 1024  
 MC2 echo-antiecho  
 SF 125.7576744 MHz  
 WDW QSINE  
 SSB 2  
 LB 0 Hz  
 GB 0

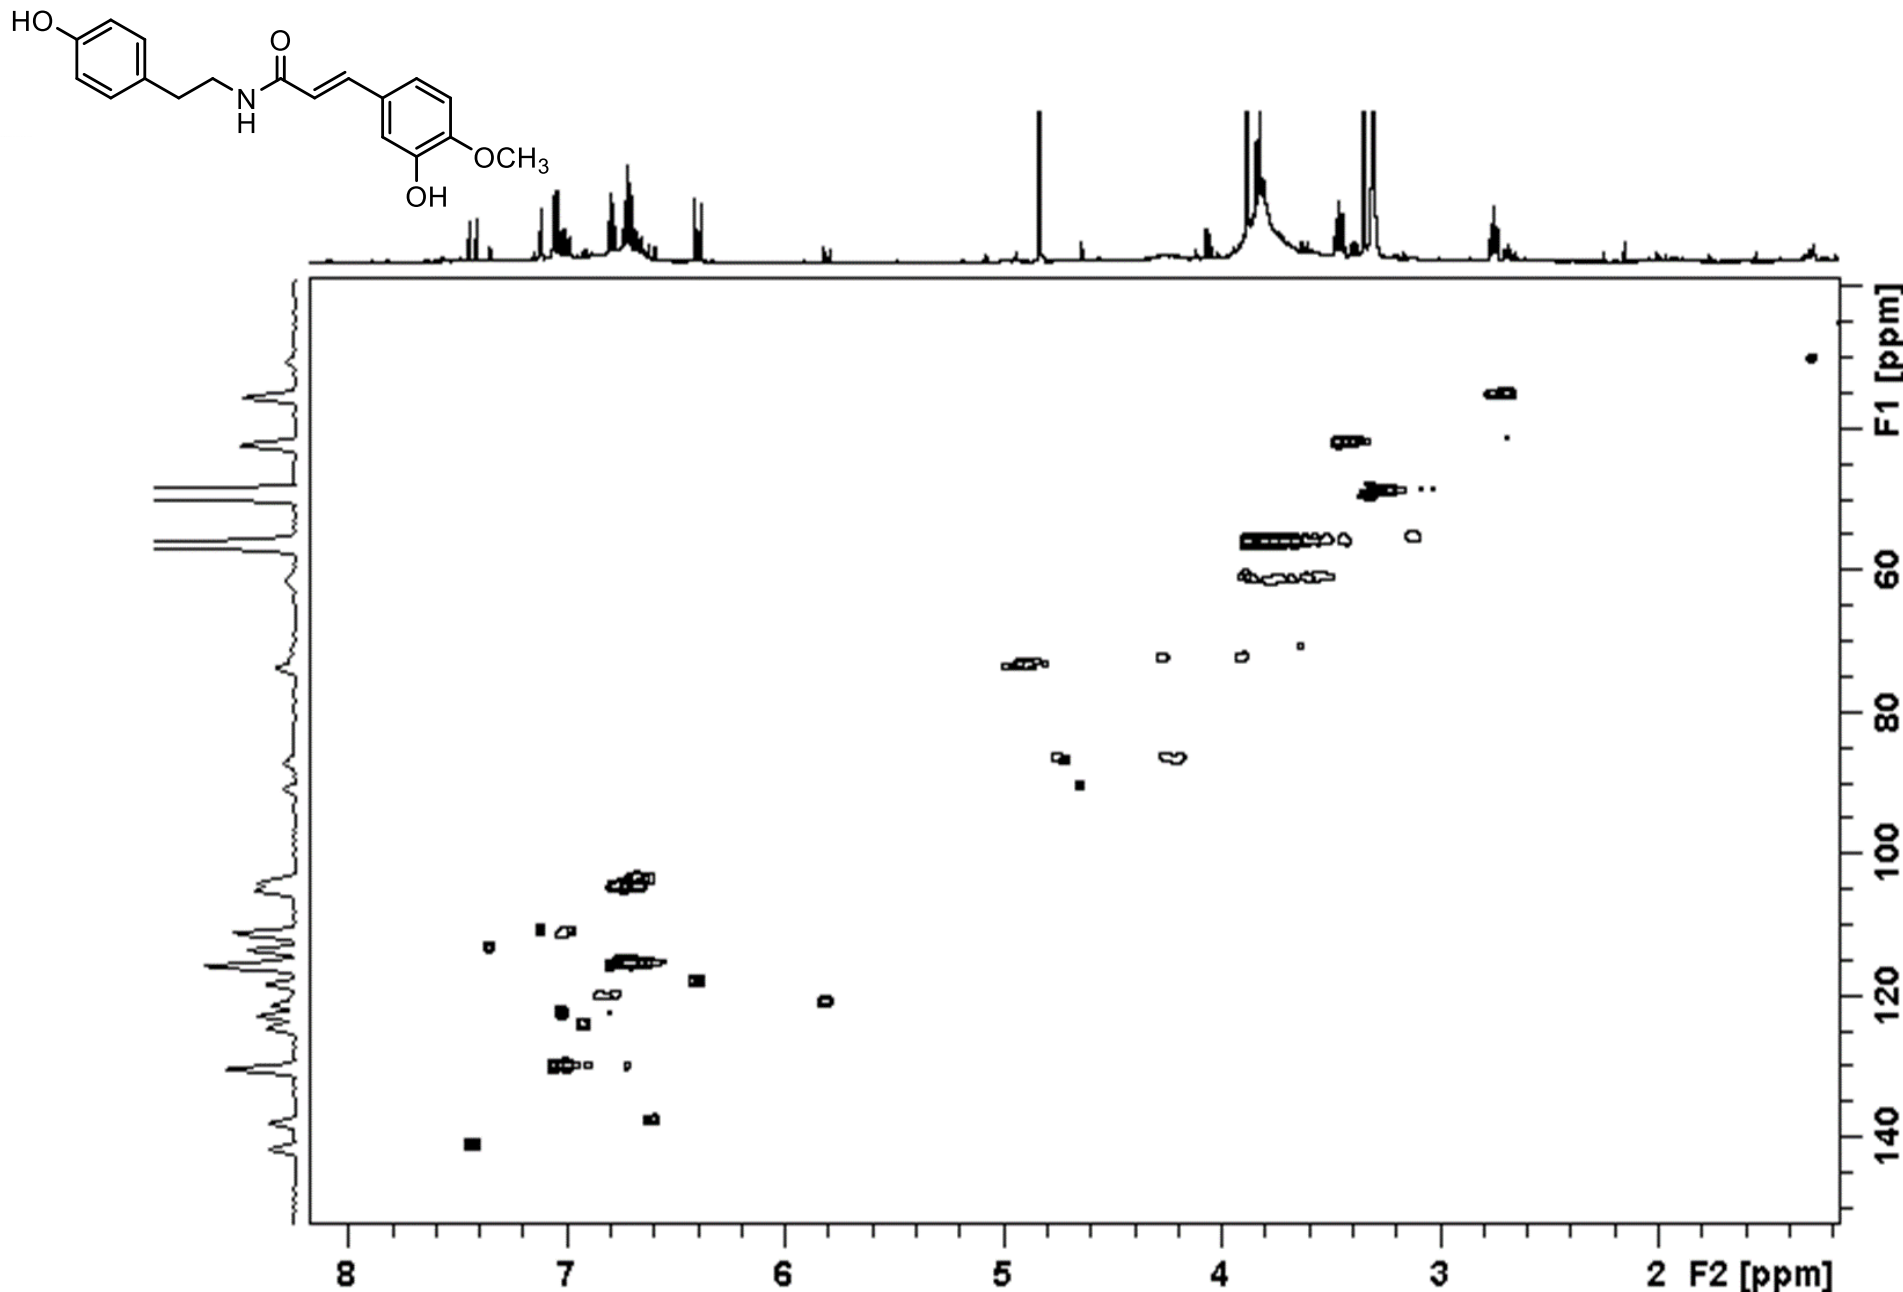

Figure S42: HSQC spectrum (125 MHz, CD<sub>3</sub>OD, TMS) *N-trans*-feruloyltyramine.

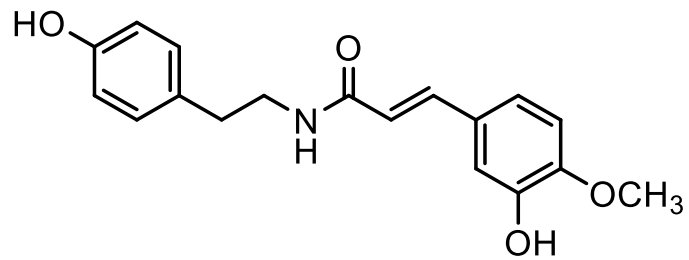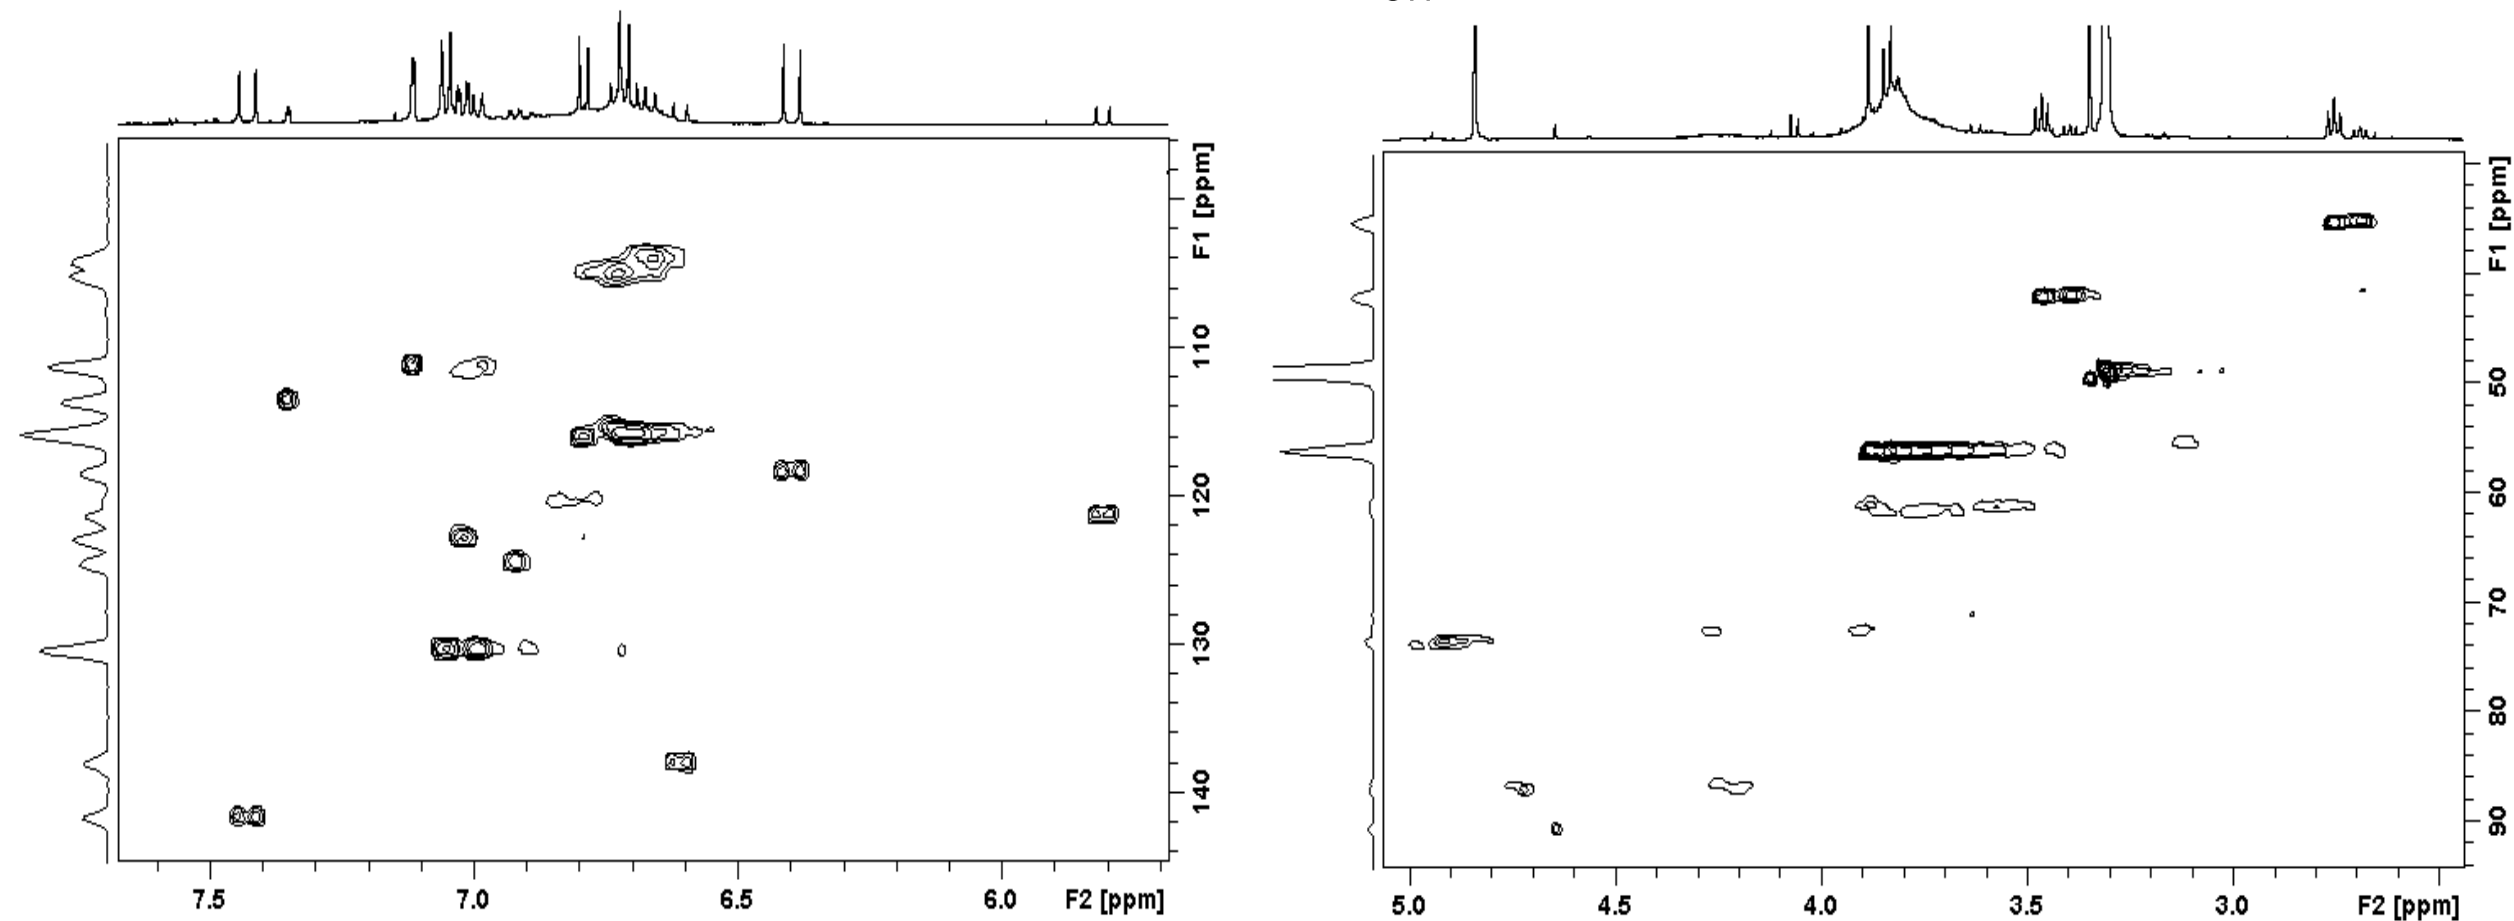

**Figure S43: Expanded regions of the HSQC spectrum (125 MHz,  $\text{CD}_3\text{OD}$ , TMS) *N-trans*-feruloyltyramine.**

Current Data Parameters  
NAME  
EXPNO 300  
PROCNO 1

F2 - Acquisition Parameters  
Date  
Time 7.00 h  
INSTRUM spect  
PROBHD Z119470.0223 (  
PULPROG hmbcgp1pndqf  
TD 2048  
SOLVENT MeOD  
NS 168  
DS 16  
SWH 10000.000 Hz  
FIDRES 4.882813 Hz  
AQ 0.1024000 sec  
RG 187.25  
DW 50.000 usec  
DE 10.00 usec  
TE 298.2 K  
CNST2 145.0000000  
CNST13 8.0000000  
D0 0.00000300 sec  
D1 1.00000000 sec  
D2 0.00344828 sec  
D6 0.06250000 sec  
D16 0.00020000 sec  
IN0 0.00001660 sec  
TDav 1  
SFO1 500.1330883 MHz  
NUC1 1H  
P1 9.40 usec  
P2 18.80 usec  
PLW1 20.32299995 W  
SFO2 125.7716219 MHz  
NUC2 13C  
P3 10.00 usec  
PLW2 88.00000000 W  
GPNAM[1] SMSQ10.100  
GPZ1 50.00 %  
GPNAM[2] SMSQ10.100  
GPZ2 30.00 %  
GPNAM[3] SMSQ10.100  
GPZ3 40.10 %  
P16 1000.00 usec

F1 - Acquisition parameters  
TD 255  
SFO1 125.7716 MHz  
FIDRES 236.239075 Hz  
SW 239.486 ppm  
FnMODE QF

F2 - Processing parameters  
SI 4096  
SF 500.1300117 MHz  
WDW SINE  
SSB 0  
LB 0 Hz  
GB 0  
PC 1.40

F1 - Processing parameters  
SI 1024  
MC2 QF  
SF 125.7576053 MHz  
WDW SINE  
SSB 0  
LB 0 Hz  
GB 0

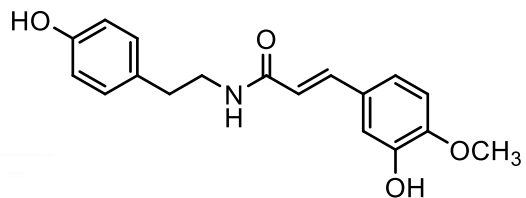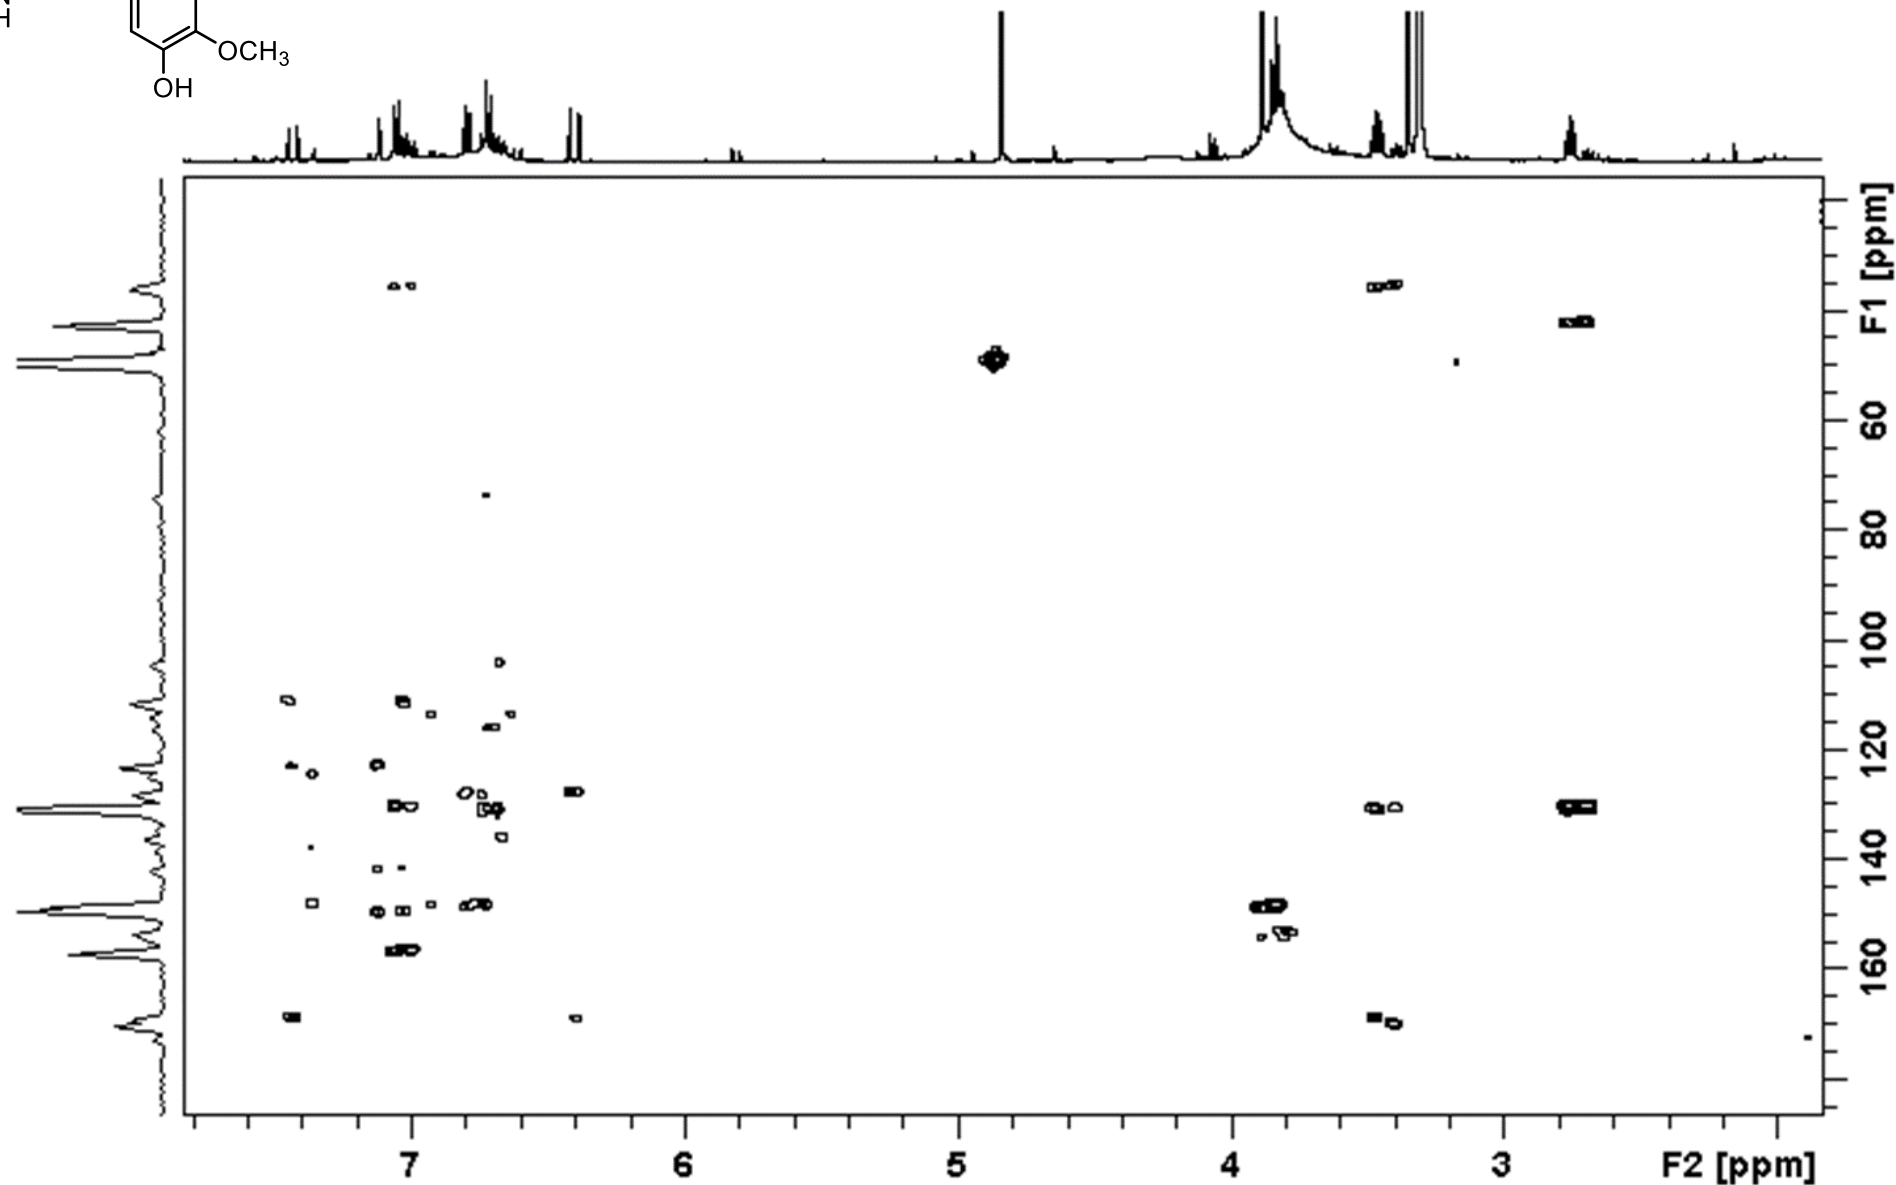

Figure S44: HMBC spectrum (125 MHz, CD<sub>3</sub>OD, TMS) of *N-trans*-feruloyltyramine.



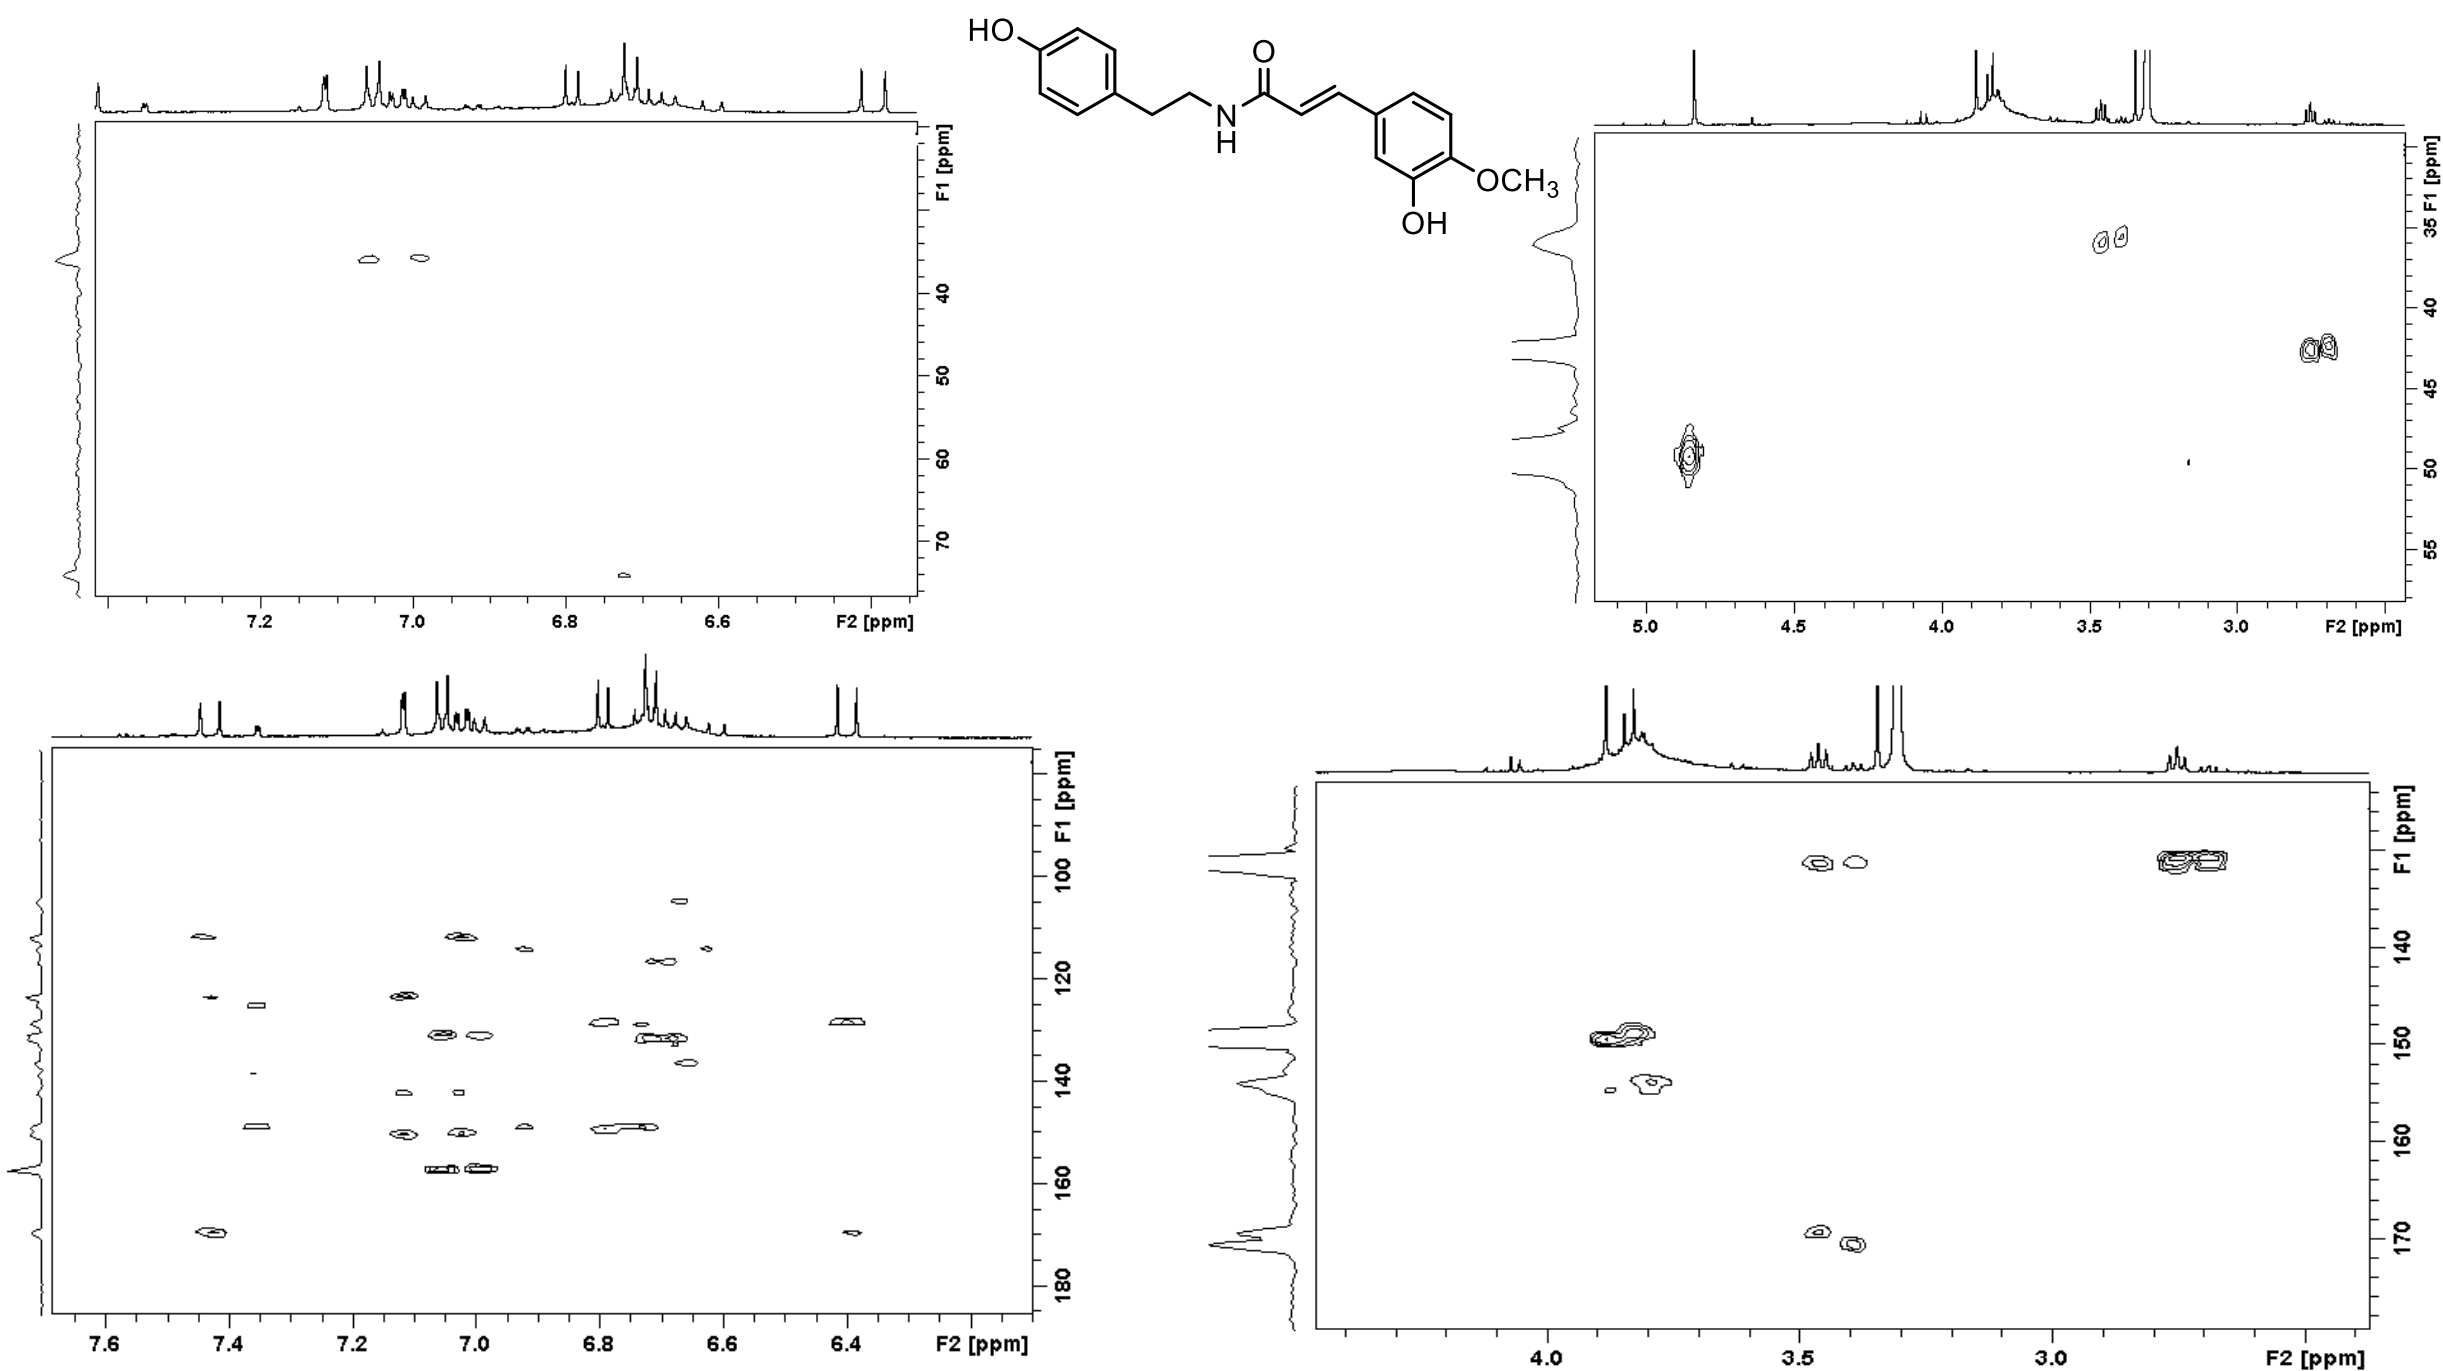

**Figure S45: Expanded regions of the HMBC spectrum (125 MHz, CD<sub>3</sub>OD, TMS) of *N-trans*-feruloyltyramine.**

**Table S5: NMR chemical shifts of *N-trans-feruloyltyramine*.** The experiments were realized in CD<sub>3</sub>OD at magnetic field strength of 11.7 T; 500 MHz for <sup>1</sup>H NMR.

s: singlet; m: multiplet; dd: doublet of doublets; ddd: doublet of doublets of doublets.

| Position           | <sup>1</sup> H                                          | <sup>13</sup> C                         |                        |
|--------------------|---------------------------------------------------------|-----------------------------------------|------------------------|
|                    | δ <sub>H</sub> , ppm (multiplicity; number of H; J, Hz) | δ <sub>C</sub> (HSQC), ppm <sup>a</sup> | HMBC, ppm <sup>a</sup> |
| 1                  | -                                                       | 123.4                                   | -                      |
| 2                  | 7.11 (d; 1H; 1.8 Hz)                                    | 111.1                                   | C-1; C-7; C-4          |
| 3                  | -                                                       | 148.8                                   | -                      |
| 4                  | -                                                       | 150.2                                   | -                      |
| 4-OCH <sub>3</sub> | 3.88 (s; 3H)                                            | 56.0                                    | C-4                    |
| 5                  | 6.70 (m; 1H)                                            | 115.7                                   | C-3                    |
| 6                  | 7.03 (dd; 1H; 1.8 and 8.5 Hz)                           | 122.7                                   | C-2; C-7; C-4          |
| 7                  | 7.44 (d; 1H; 16 Hz)                                     | 141.5                                   | C-2; C-1; C-9          |
| 8                  | 6.40 (d; 1H; 16 Hz)                                     | 118.4                                   | C-9                    |
| 9                  | -                                                       | 169.3                                   | -                      |
| 1'                 | -                                                       | 130.9                                   | -                      |
| 2'                 | 7.06 (m; 1H)                                            | 130.2                                   | C-7'; C-1'; C-4'       |
| 3'                 | 6.72 (m; 2H)                                            | 115.7                                   | C-1'; C-4'             |
| 4'                 | -                                                       | 157.1                                   | -                      |
| 5'                 | 6.72 (m; 2H)                                            | 115.7                                   | C-1'; C-4'             |
| 6'                 | 7.06 (m; 1H)                                            | 130.2                                   | C-7'; C-1'; C-4'       |
| 7'                 | 2.75 (m; 2H)                                            | 35.4                                    | C-8'; C-1'             |
| 8'                 | 3.46 (m; 2H)                                            | 42.1                                    | C-7'; C-1'; C-9        |

<sup>a</sup> <sup>13</sup>C NMR signals were assigned using the HSQC and HMBC data.

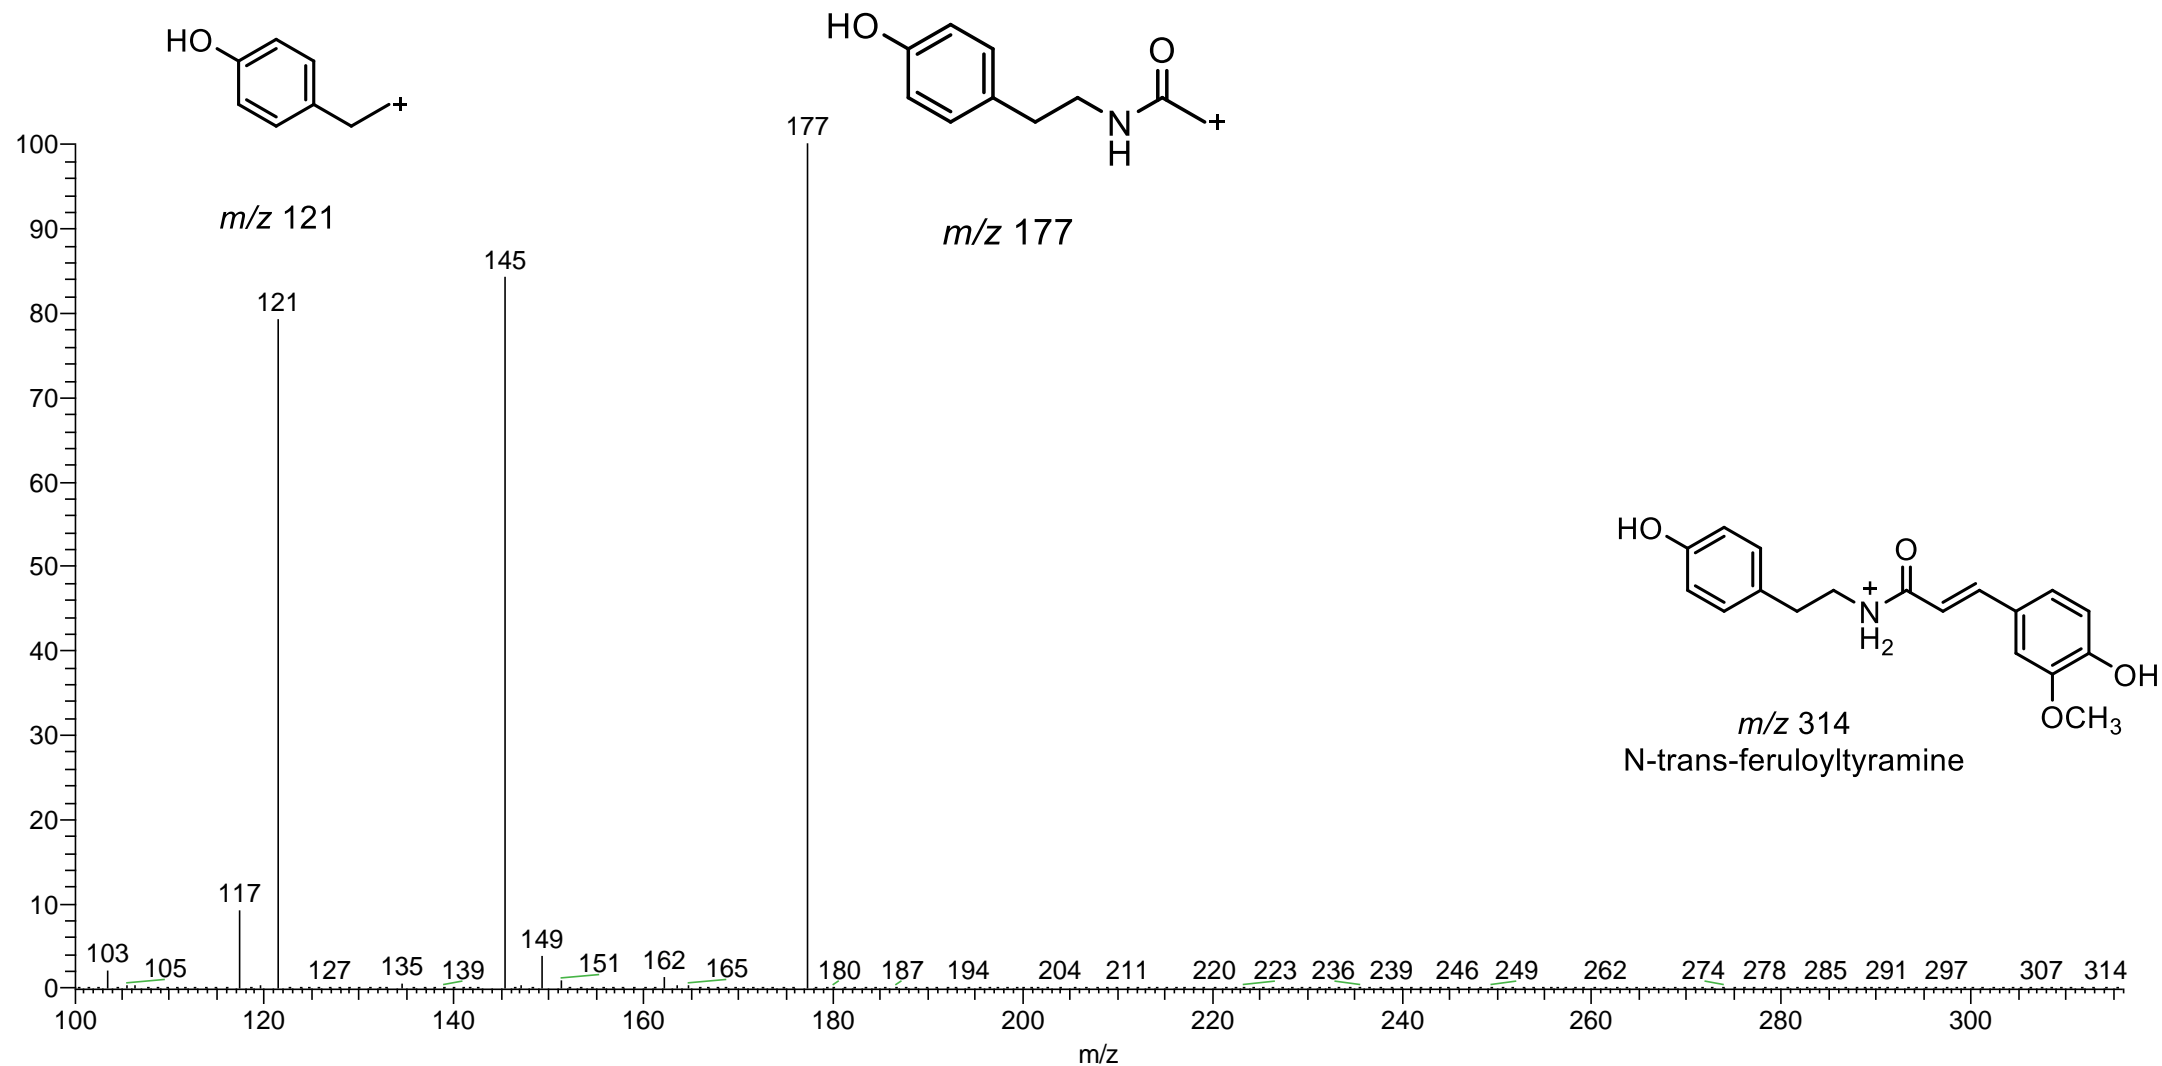

**Figure S46: Mass spectrum (MS/MS) of *N-trans*-feruloyltyramine with chemical structure and identification of the main fragment ions.**

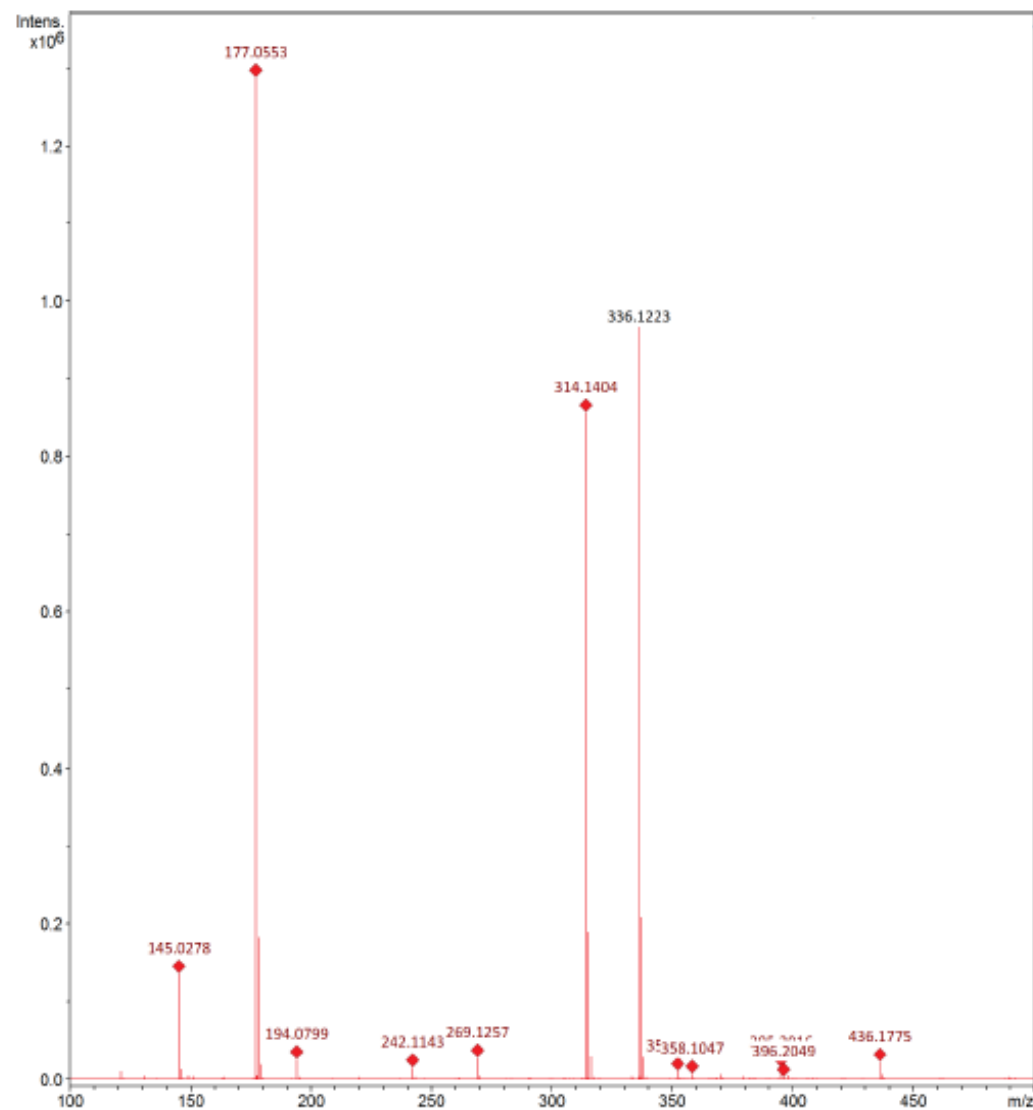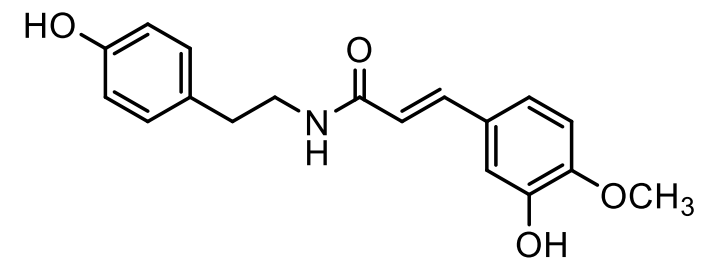

**Figure S47: High resolution mass-spectrum of *N-trans*-feruloyltyramine with chemical structure.**

# Report S1

## MD Simulation Report on AChE - Neostigmine Interactions

### Simulation Details

Jobname: md\_job\_6H12\_NEO-3\_best\_10ns\_TIP4PEw  
Entry title: Setup\_6H12\_NEO-3-best\_mmgbsa

| CPU # | Job Type | Ensemble | Temp. [K] | Sim. Time [ns] | # Atoms | # Waters | Charge |
|-------|----------|----------|-----------|----------------|---------|----------|--------|
| 1     | mdsim    | NPT      | 300.0     | 10.005         | 62798   | 17952    | 0      |

### Protein Information

|     | Tot. Residues | Prot. Chain(s)                                              | Res. in Chain(s)  | # Atoms | # Heavy Atoms | Charge |
|-----|---------------|-------------------------------------------------------------|-------------------|---------|---------------|--------|
|     | 562           | 'NoChainId'                                                 | ict_values([562]) | 8798    | 4471          | -10    |
| SSA | 4             | 5 10 15 20 25 30 35 40 45 50 55 60 65 70 73                 |                   |         |               |        |
|     |               |                                                             |                   |         |               |        |
| SSA | 74            | 75 80 85 90 95 100 105 110 115 120 125 130 135 140 143      |                   |         |               |        |
|     |               |                                                             |                   |         |               |        |
| SSA | 144           | 145 150 155 160 165 170 175 180 185 190 195 200 205 210 213 |                   |         |               |        |
|     |               |                                                             |                   |         |               |        |
| SSA | 214           | 215 220 225 230 235 240 245 250 255 260 265 270 275 280 283 |                   |         |               |        |
|     |               |                                                             |                   |         |               |        |
| SSA | 284           | 285 290 295 300 305 310 315 320 325 330 335 340 345 350 353 |                   |         |               |        |
|     |               |                                                             |                   |         |               |        |
| SSA | 354           | 355 360 365 370 375 380 385 390 395 400 405 410 415 420 423 |                   |         |               |        |
|     |               |                                                             |                   |         |               |        |
| SSA | 424           | 425 430 435 440 445 450 455 460 465 470 475 480 485 490 493 |                   |         |               |        |
|     |               |                                                             |                   |         |               |        |
| SSA | 494           | 495 500 505 510 515 520 525 530 535 540 545 550 555 560 563 |                   |         |               |        |
|     |               |                                                             |                   |         |               |        |
| SSA | 564           | IF                                                          | 565               |         |               |        |

### Ligand Information

|                    |                                  |
|--------------------|----------------------------------|
| SMILES             | CN(C)C(=O)Oc(ccc1)cc1[N+](C)(C)C |
| PDB Name           | 'UNK'                            |
| Num. of Atoms      | 35 (total) 16 (heavy)            |
| Atomic Mass        | 223.297 au                       |
| Charge             | +1                               |
| Mol. Formula       | C12H19N2O2                       |
| Num. of Fragments  | 5                                |
| Num. of Rot. Bonds | 4                                |

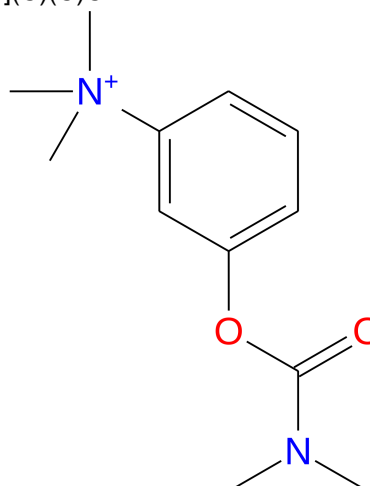

| Type | Num. | Concentration [mM] | Total Charge |
|------|------|--------------------|--------------|
| Na   | 59   | 59.755             | +59          |
| Cl   | 50   | 50.640             | -50          |

## Protein-Ligand RMSD

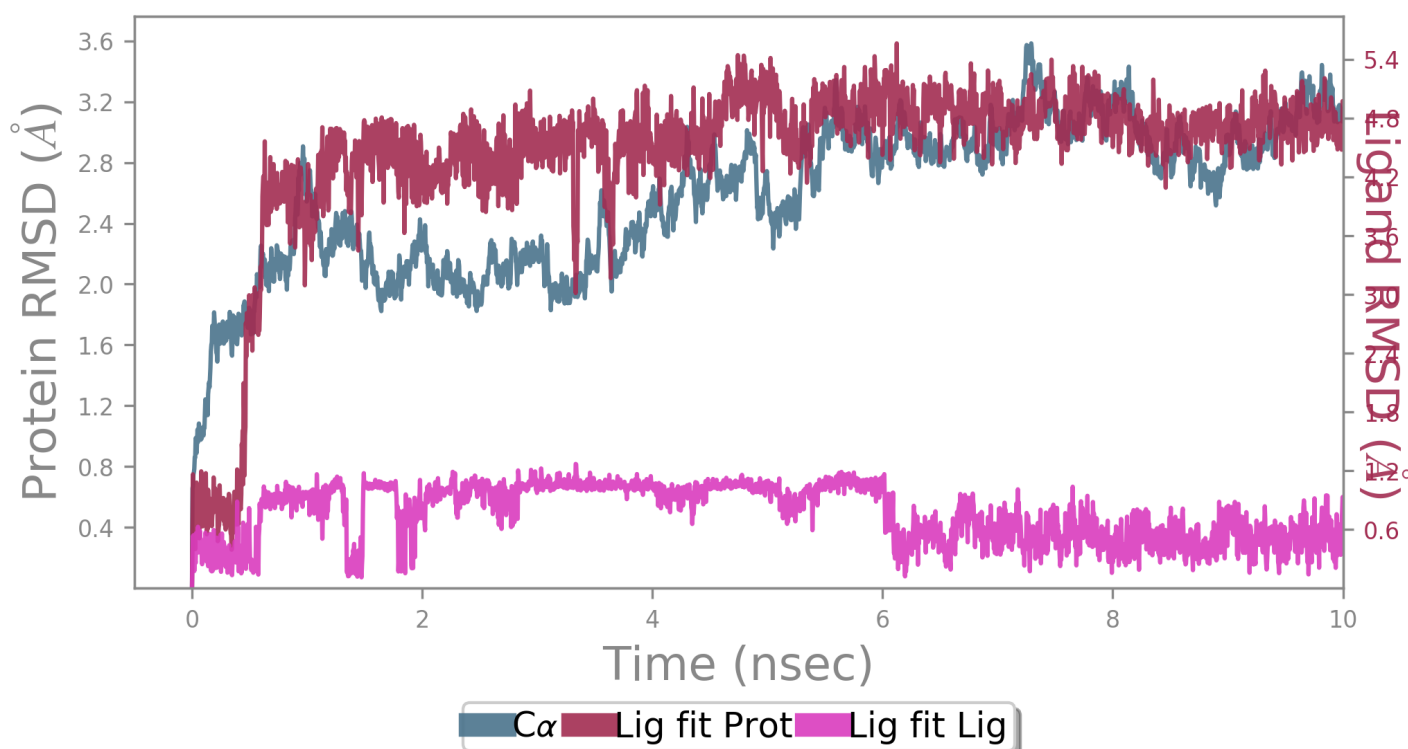

The Root Mean Square Deviation (RMSD) is used to measure the average change in displacement of a selection of atoms for a particular frame with respect to a reference frame. It is calculated for all frames in the trajectory. The RMSD for frame  $x$  is:

$$RMSD_x = \sqrt{\frac{1}{N} \sum_{i=1}^N (r'_i(t_x) - r_i(t_{ref}))^2}$$

where  $N$  is the number of atoms in the atom selection;  $t_{ref}$  is the reference time, (typically the first frame is used as the reference and it is regarded as time  $t=0$ ); and  $r'$  is the position of the selected atoms in frame  $x$  after superimposing on the reference frame, where frame  $x$  is recorded at time  $t_x$ . The procedure is repeated for every frame in the simulation trajectory.

**Protein RMSD:** The above plot shows the RMSD evolution of a protein (left Y-axis). All protein frames are first aligned on the reference frame backbone, and then the RMSD is calculated based on the atom selection. Monitoring the RMSD of the protein can give insights into its structural conformation throughout the simulation. RMSD analysis can indicate if the simulation has equilibrated — its fluctuations towards the end of the simulation are around some thermal average structure. Changes of the order of 1-3 Å are perfectly acceptable for small, globular proteins. Changes much larger than that, however, indicate that the protein is undergoing a large conformational change during the simulation. It is also important that your simulation converges — the RMSD values stabilize around a fixed value. If the RMSD of the protein is still increasing or decreasing on average at the end of the simulation, then your system has not equilibrated, and your simulation may not be long enough for rigorous analysis.

**Ligand RMSD:** Ligand RMSD (right Y-axis) indicates how stable the ligand is with respect to the protein and its binding pocket. In the above plot, 'Lig fit Prot' shows the RMSD of a ligand when the protein-ligand complex is first aligned on the protein backbone of the reference and then the RMSD of the ligand heavy atoms is measured. If the values observed are significantly larger than the RMSD of the protein, then it is likely that the ligand has diffused away from its initial binding site. 'Lig fit Lig' shows the RMSD of a ligand that is aligned and measured just on its reference conformation. This RMSD value measures the internal fluctuations of the ligand atoms.

## Protein RMSF

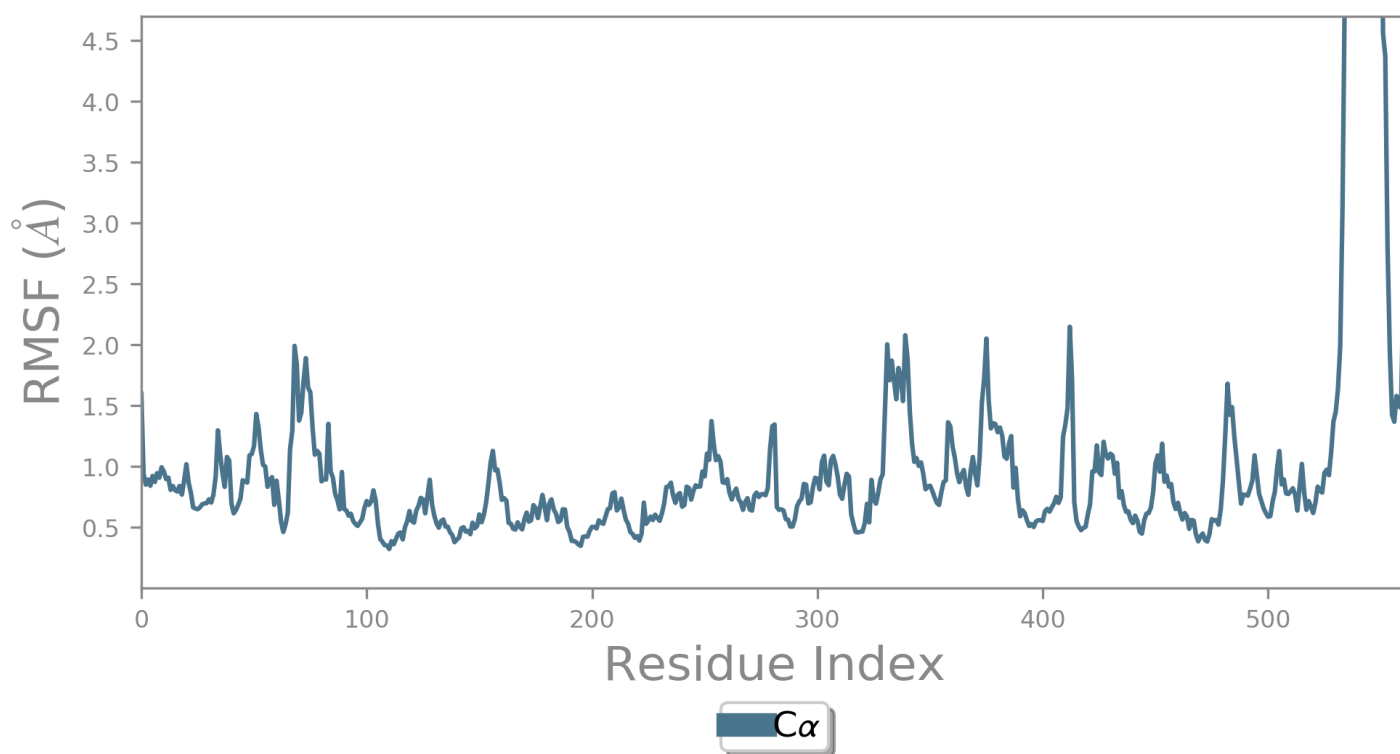

The Root Mean Square Fluctuation (RMSF) is useful for characterizing local changes along the protein chain. The RMSF for residue  $i$  is:

$$RMSF_i = \sqrt{\frac{1}{T} \sum_{t=1}^T \langle (r'_i(t)) - r_i(t_{ref})^2 \rangle}$$

where  $T$  is the trajectory time over which the RMSF is calculated,  $t_{ref}$  is the reference time,  $r_i$  is the position of residue  $i$ ;  $r'$  is the position of atoms in residue  $i$  after superposition on the reference, and the angle brackets indicate that the average of the square distance is taken over the selection of atoms in the residue.

On this plot, peaks indicate areas of the protein that fluctuate the most during the simulation. Typically you will observe that the tails ( $N$ - and  $C$ -terminal) fluctuate more than any other part of the protein. Secondary structure elements like alpha helices and beta strands are usually more rigid than the unstructured part of the protein, and thus fluctuate less than the loop regions.



## Protein Secondary Structure

% Helix  
29.17

% Strand  
12.85

% Total SSE  
42.02

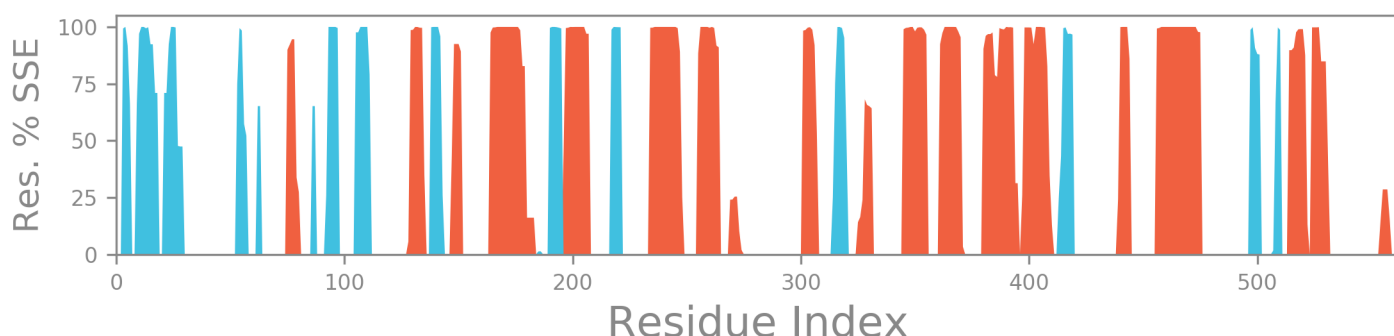

Protein secondary structure elements (SSE) like **alpha-helices** and **beta-strands** are monitored throughout the simulation. The plot above reports SSE distribution by residue index throughout the protein structure. The plot below summarizes the SSE composition for each trajectory frame over the course of the simulation, and the plot at the bottom monitors each residue and its SSE assignment over time.

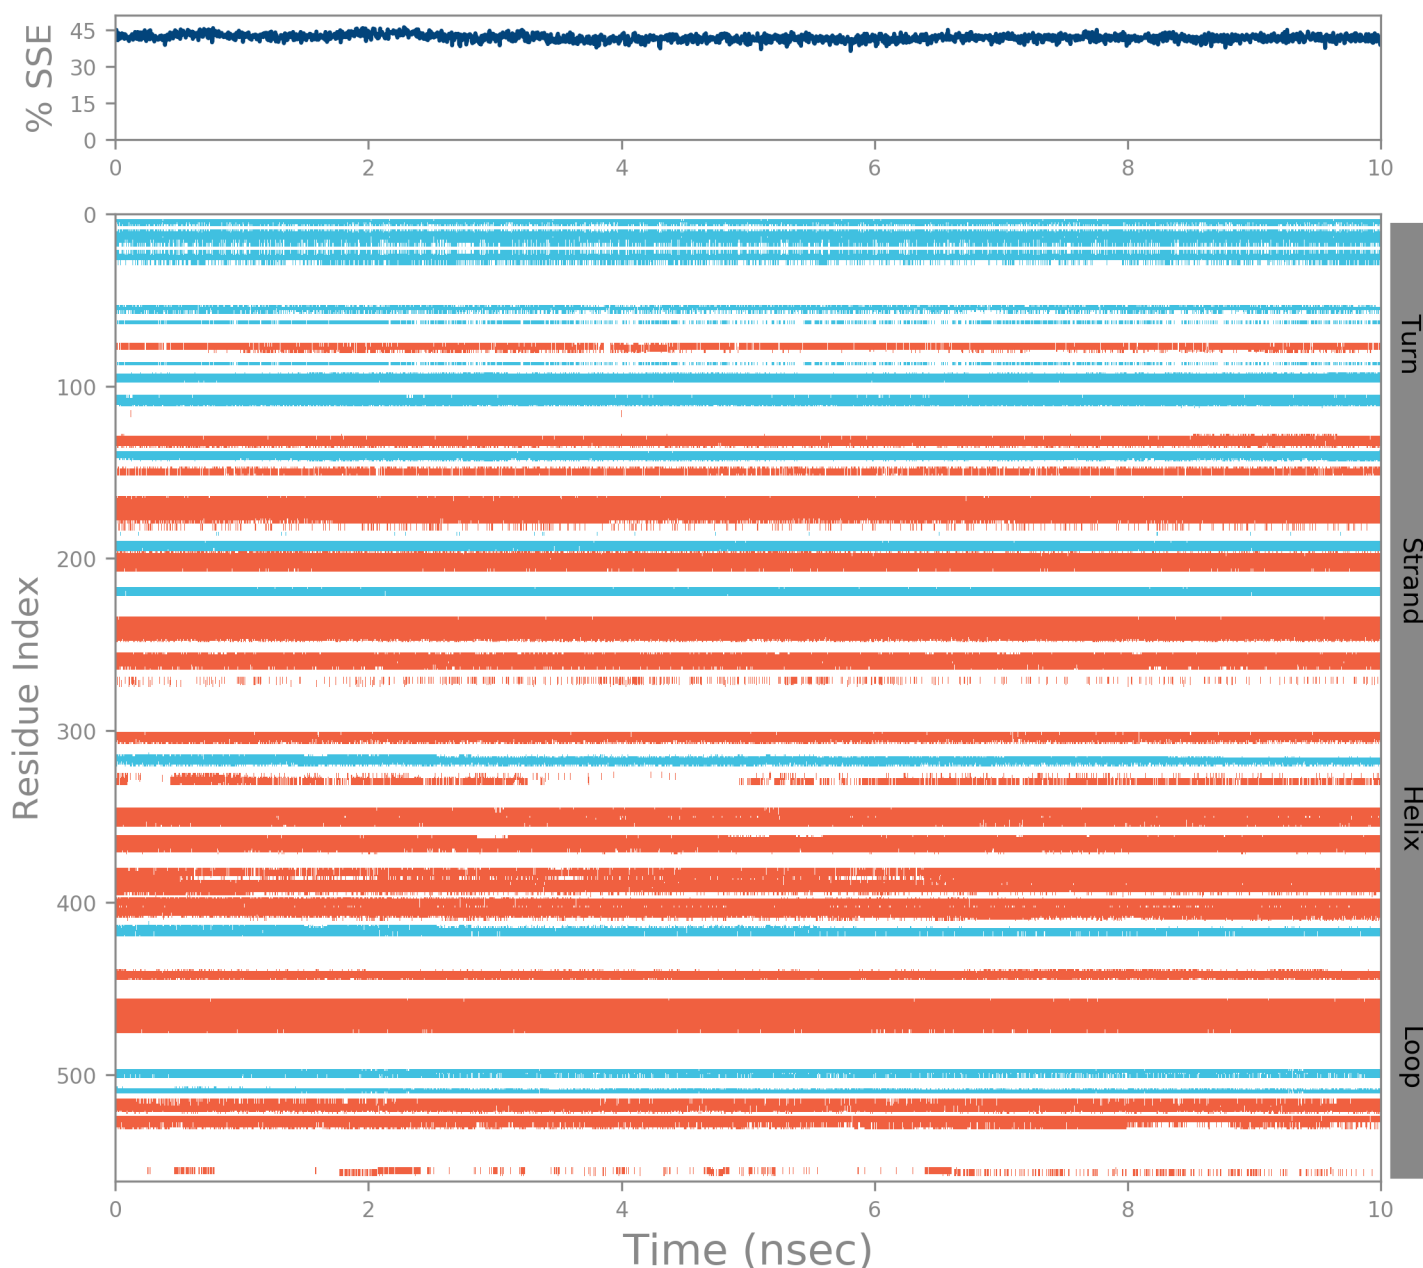

## Ligand RMSF

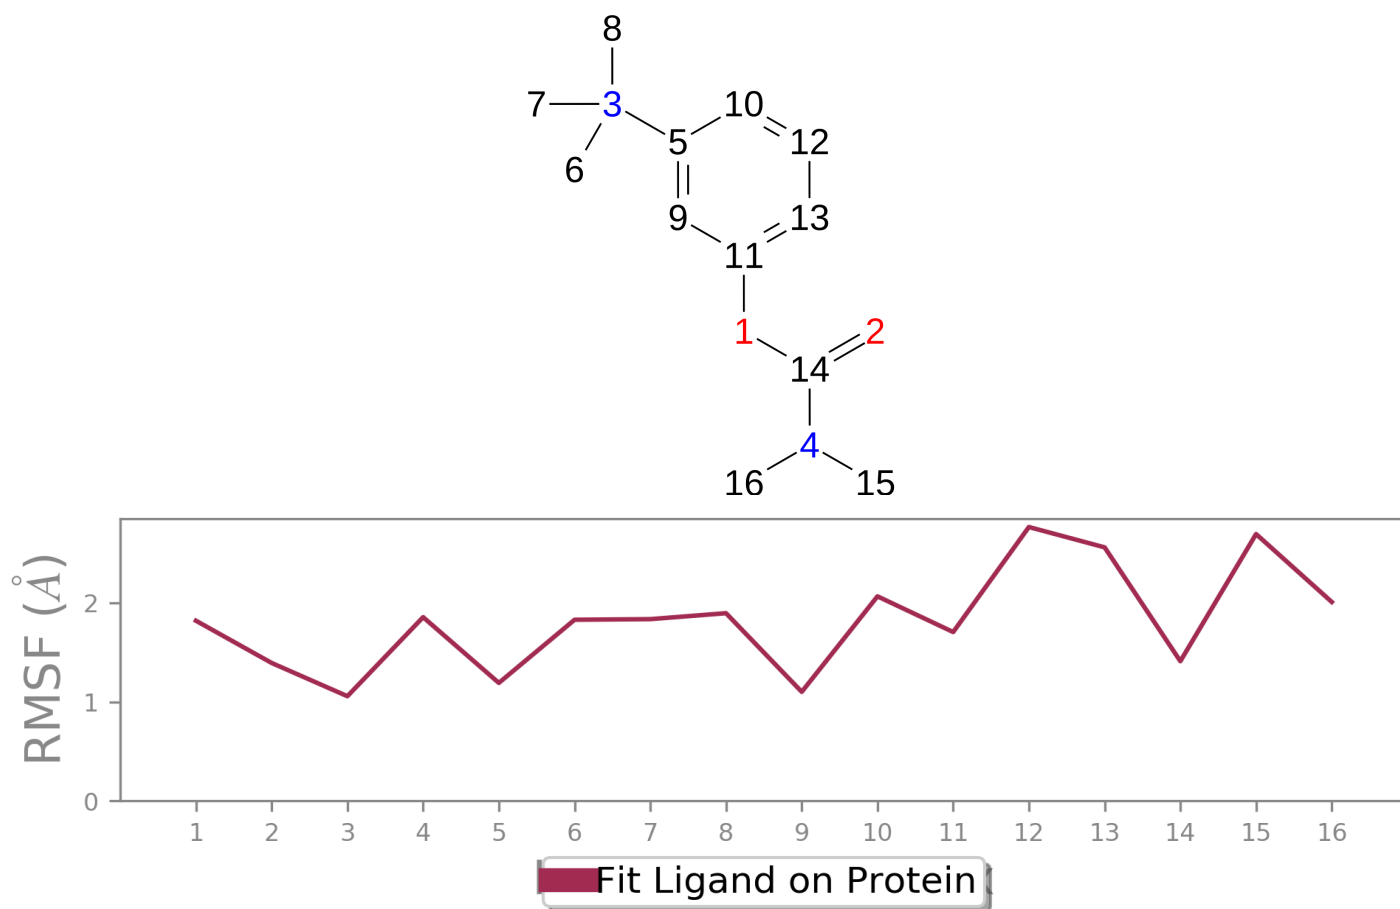

The Ligand Root Mean Square Fluctuation (L-RMSF) is useful for characterizing changes in the ligand atom positions. The RMSF for atom  $i$  is:

$$RMSF_i = \sqrt{\frac{1}{T} \sum_{t=1}^T (r'_i(t) - r_i(t_{ref}))^2}$$

where  $T$  is the trajectory time over which the RMSF is calculated,  $t_{ref}$  is the reference time (usually for the first frame, and is regarded as the zero of time);  $r$  is the position of atom  $i$  in the reference at time  $t_{ref}$  and  $r'$  is the position of atom  $i$  at time  $t$  after superposition on the reference frame.

Ligand RMSF shows the ligand's fluctuations broken down by atom, corresponding to the 2D structure in the top panel. The ligand RMSF may give you insights on how ligand fragments interact with the protein and their entropic role in the binding event. In the bottom panel, the 'Fit Ligand on Protein' line shows the ligand fluctuations, with respect to the protein. The protein-ligand complex is first aligned on the protein backbone and then the ligand RMSF is measured on the ligand heavy atoms.

## Protein-Ligand Contacts

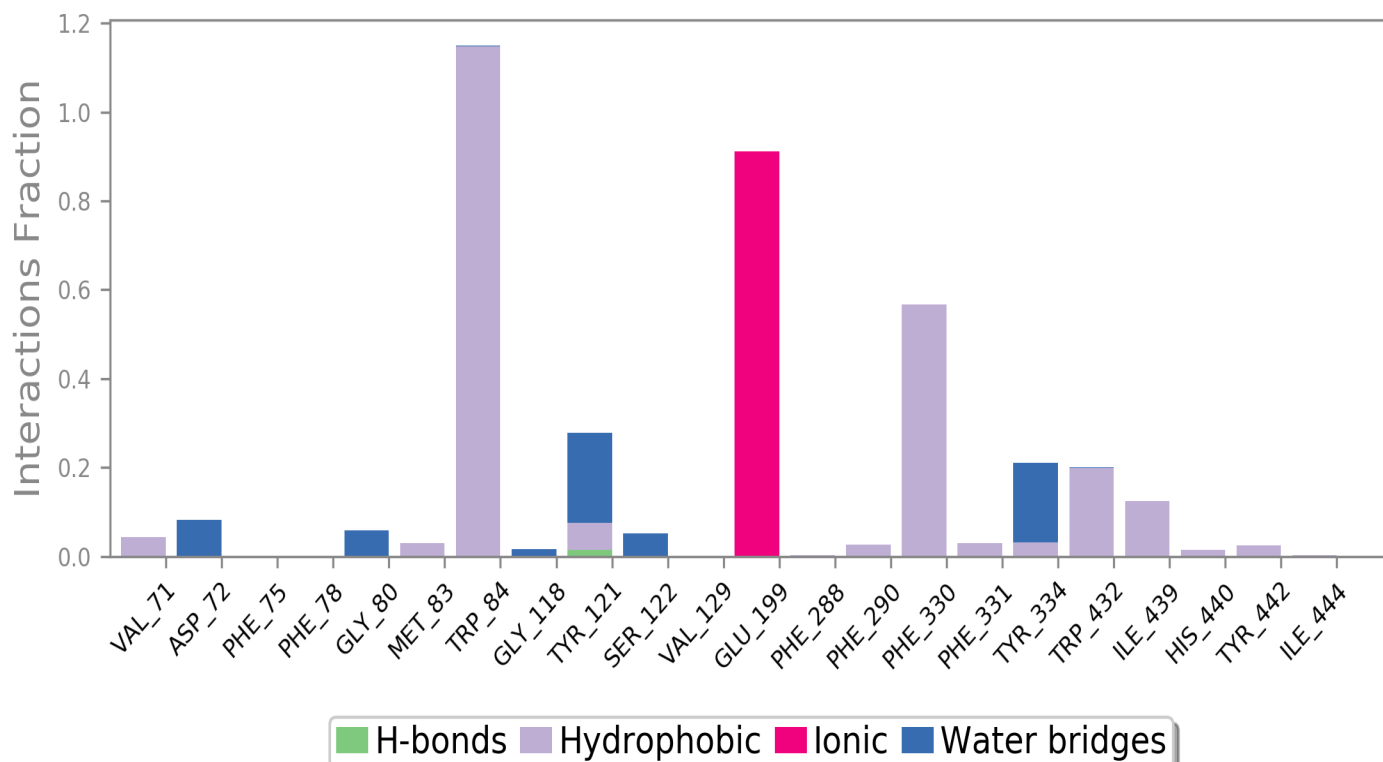

Protein interactions with the ligand can be monitored throughout the simulation. These interactions can be categorized by type and summarized, as shown in the plot above. Protein-ligand interactions (or 'contacts') are categorized into four types: Hydrogen Bonds, Hydrophobic, Ionic and Water Bridges. Each interaction type contains more specific subtypes, which can be explored through the 'Simulation Interactions Diagram' panel. The stacked bar charts are normalized over the course of the trajectory: for example, a value of 0.7 suggests that 70% of the simulation time the specific interaction is maintained. Values over 1.0 are possible as some protein residue may make multiple contacts of same subtype with the ligand.

**Hydrogen Bonds:** (H-bonds) play a significant role in ligand binding. Consideration of hydrogen-bonding properties in drug design is important because of their strong influence on drug specificity, metabolism and adsorption. Hydrogen bonds between a protein and a ligand can be further broken down into four subtypes: backbone acceptor; backbone donor; side-chain acceptor; side-chain donor.

The current geometric criteria for protein-ligand H-bond is: distance of 2.5 Å between the donor and acceptor atoms (D—H...A); a donor angle of  $\geq 120^\circ$  between the donor-hydrogen-acceptor atoms (D—H...A); and an acceptor angle of  $\geq 90^\circ$  between the hydrogen-acceptor-bonded\_atom atoms (H...A—X).

**Hydrophobic contacts:** fall into three subtypes:  $\pi$ -Cation;  $\pi$ - $\pi$ ; and Other, non-specific interactions. Generally these type of interactions involve a hydrophobic amino acid and an aromatic or aliphatic group on the ligand, but we have extended this category to also include  $\pi$ -Cation interactions.

The current geometric criteria for hydrophobic interactions is as follows:  $\pi$ -Cation — Aromatic and charged groups within 4.5 Å;  $\pi$ - $\pi$  — Two aromatic groups stacked face-to-face or face-to-edge; Other — A non-specific hydrophobic sidechain within 3.6 Å of a ligand's aromatic or aliphatic carbons.

**Ionic interactions:** or polar interactions, are between two oppositely charged atoms that are within 3.7 Å of each other and do not involve a hydrogen bond. We also monitor Protein-Metal-Ligand interactions, which are defined by a metal ion coordinated within 3.4 Å of protein's and ligand's heavy atoms (except carbon). All ionic interactions are broken down into two subtypes: those mediated by a protein backbone or side chains.

**Water Bridges:** are hydrogen-bonded protein-ligand interactions mediated by a water molecule. The hydrogen-bond geometry is slightly relaxed from the standard H-bond definition.

The current geometric criteria for a protein-water or water-ligand H-bond are: a distance of 2.8 Å between the donor and acceptor atoms (D—H...A); a donor angle of  $\geq 110^\circ$  between the donor-hydrogen-acceptor atoms (D—H...A); and an acceptor angle of  $\geq 90^\circ$  between the hydrogen-acceptor-bonded\_atom atoms (H...A—X).

## Protein-Ligand Contacts (cont.)

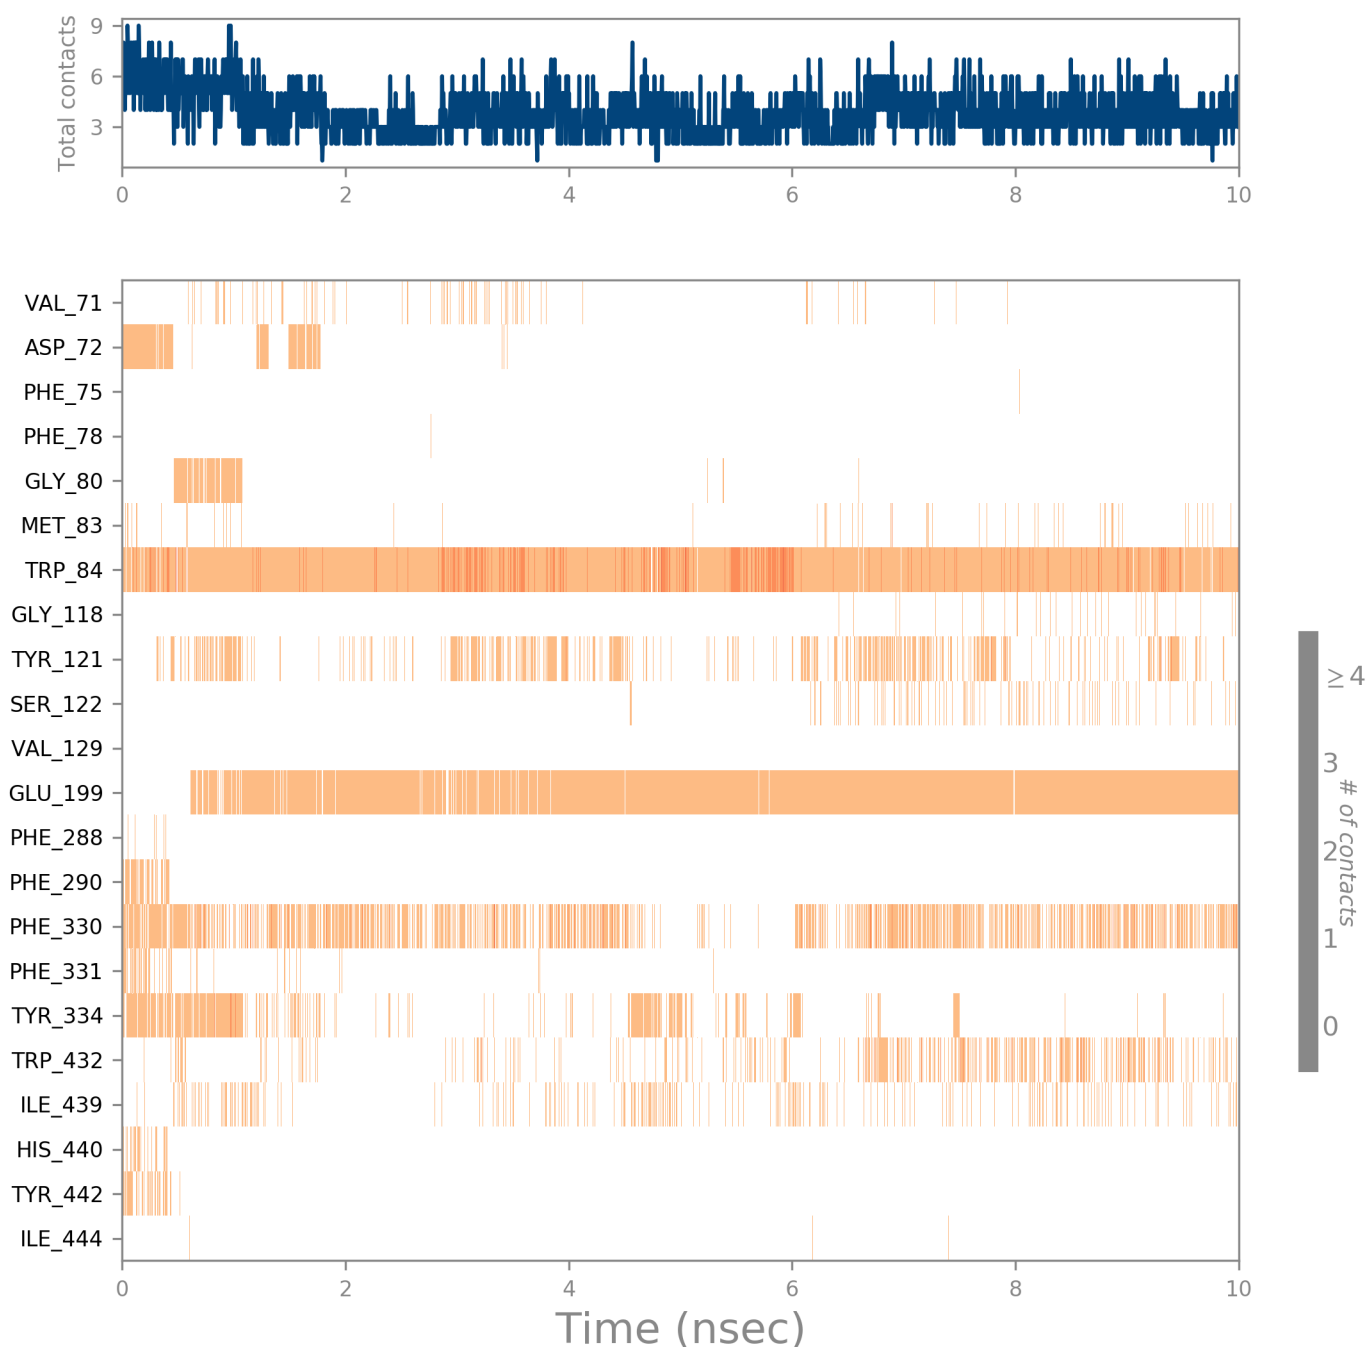

A timeline representation of the interactions and contacts (**H-bonds, Hydrophobic, Ionic, Water bridges**) summarized in the previous page. The top panel shows the total number of specific contacts the protein makes with the ligand over the course of the trajectory. The bottom panel shows which residues interact with the ligand in each trajectory frame. Some residues make more than one specific contact with the ligand, which is represented by a darker shade of orange, according to the scale to the right of the plot.

## Ligand-Protein Contacts

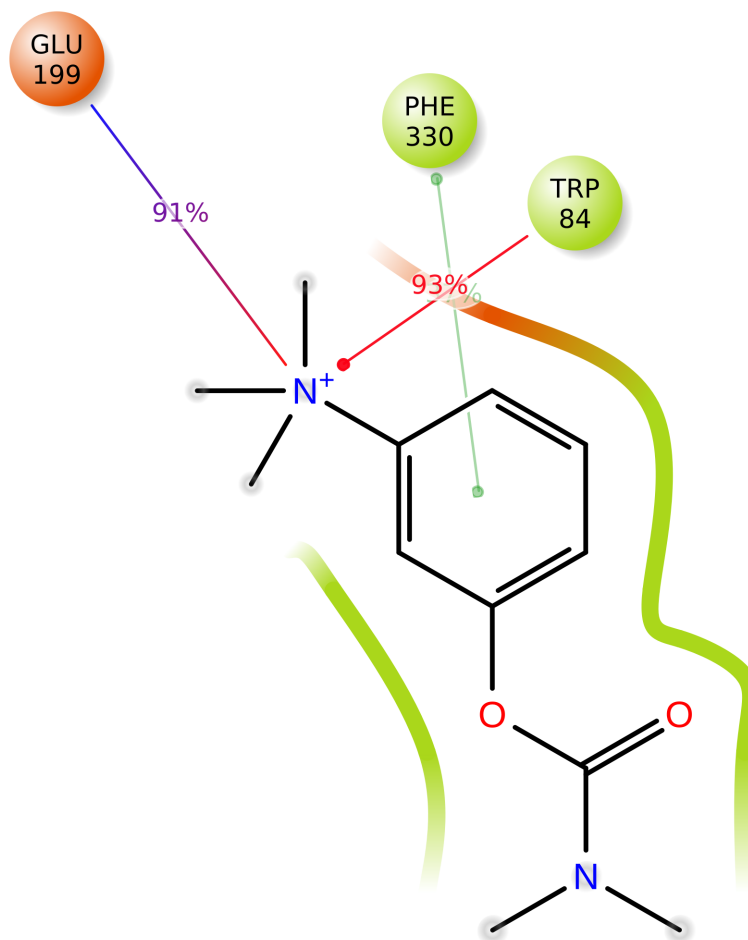

- |                                                                                                        |                                                                                                    |                                                                                                      |
|--------------------------------------------------------------------------------------------------------|----------------------------------------------------------------------------------------------------|------------------------------------------------------------------------------------------------------|
|  Charged (negative) |  Pi-Pi stacking |  Salt bridge      |
|  Hydrophobic        |  Pi-cation      |  Solvent exposure |

A schematic of detailed ligand atom interactions with the protein residues. Interactions that occur more than **30.0%** of the simulation time in the selected trajectory ( 0.00 through 10.00 nsec), are shown.

Note: it is possible to have interactions with >100% as some residues may have multiple interactions of a single type with the same ligand atom. For example, the ARG side chain has four H-bond donors that can all hydrogen-bond to a single H-bond acceptor.

## Ligand Torsion Profile

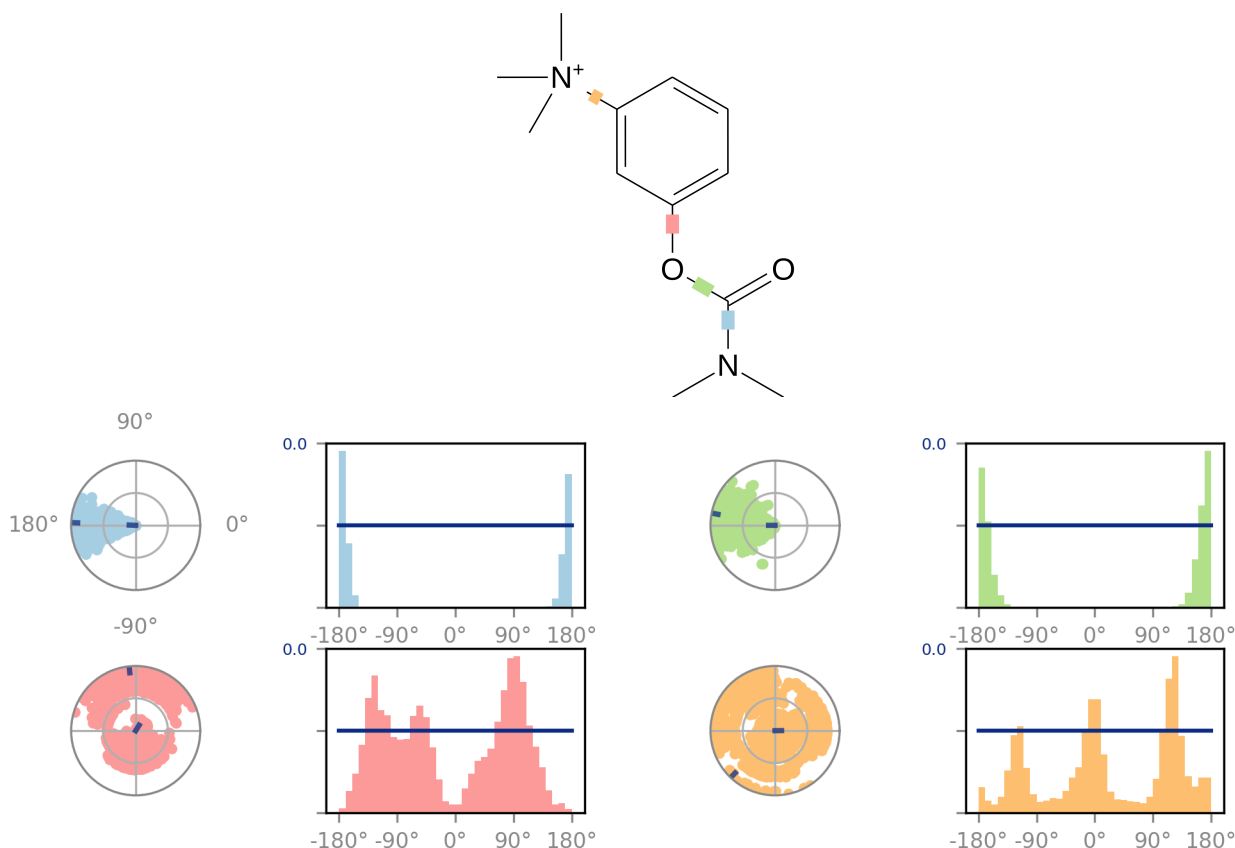

The ligand torsions plot summarizes the conformational evolution of every rotatable bond (RB) in the ligand throughout the simulation trajectory ( 0.00 through 10.00 nsec). The top panel shows the 2d schematic of a ligand with color-coded rotatable bonds. Each rotatable bond torsion is accompanied by a dial plot and bar plots of the same color.

Dial (or radial) plots describe the conformation of the torsion throughout the course of the simulation. The beginning of the simulation is in the center of the radial plot and the time evolution is plotted radially outwards.

The bar plots summarize the data on the dial plots, by showing the probability density of the torsion. If torsional potential information is available, the plot also shows the potential of the rotatable bond (by summing the potential of the related torsions). The values of the potential are on the left Y-axis of the chart, and are expressed in *kcal/mol*. Looking at the histogram and torsion potential relationships may give insights into the conformational strain the ligand undergoes to maintain a protein-bound conformation.

## Ligand Properties

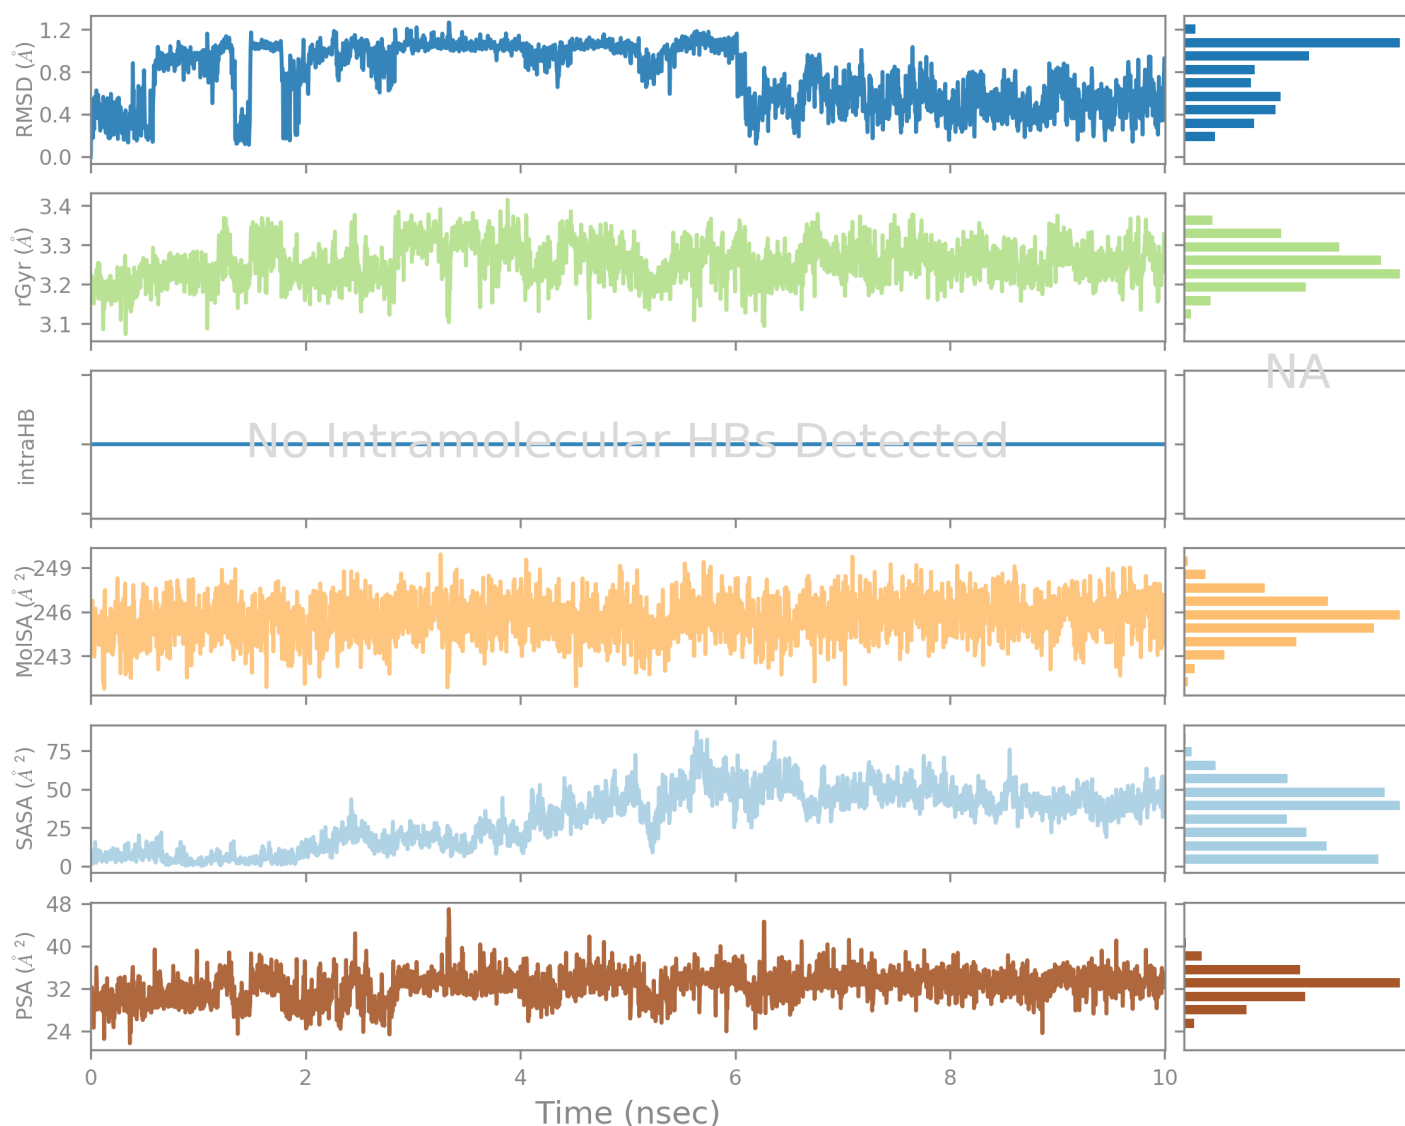

**Ligand RMSD:** Root mean square deviation of a ligand with respect to the reference conformation (typically the first frame is used as the reference and it is regarded as time  $t=0$ ).

**Radius of Gyration (rGyr):** Measures the 'extendedness' of a ligand, and is equivalent to its principal moment of inertia.

**Intramolecular Hydrogen Bonds (intraHB):** Number of internal hydrogen bonds (HB) within a ligand molecule.

**Molecular Surface Area (MolISA):** Molecular surface calculation with 1.4 Å probe radius. This value is equivalent to a van der Waals surface area.

**Solvent Accessible Surface Area (SASA):** Surface area of a molecule accessible by a water molecule.

**Polar Surface Area (PSA):** Solvent accessible surface area in a molecule contributed only by oxygen and nitrogen atoms.

# Report S2

## MD Simulation Report on AChE - Lindholdhamine Isomer Interactions

### Simulation Details

Jobname: md\_job\_6H12\_1-dock-3  
Entry title: 1-dock-3-rec

| CPU # | Job Type | Ensemble | Temp. [K] | Sim. Time [ns] | # Atoms | # Waters | Charge |
|-------|----------|----------|-----------|----------------|---------|----------|--------|
| 1     | mdsim    | NPT      | 300.0     | 10.005         | 62848   | 17954    | 0      |

### Protein Information

| Tot. Residues | Prot. Chain(s) | Res. in Chain(s)  | # Atoms | # Heavy Atoms | Charge |
|---------------|----------------|-------------------|---------|---------------|--------|
| 562           | 'NoChainId'    | ict_values([562]) | 8798    | 4471          | -10    |

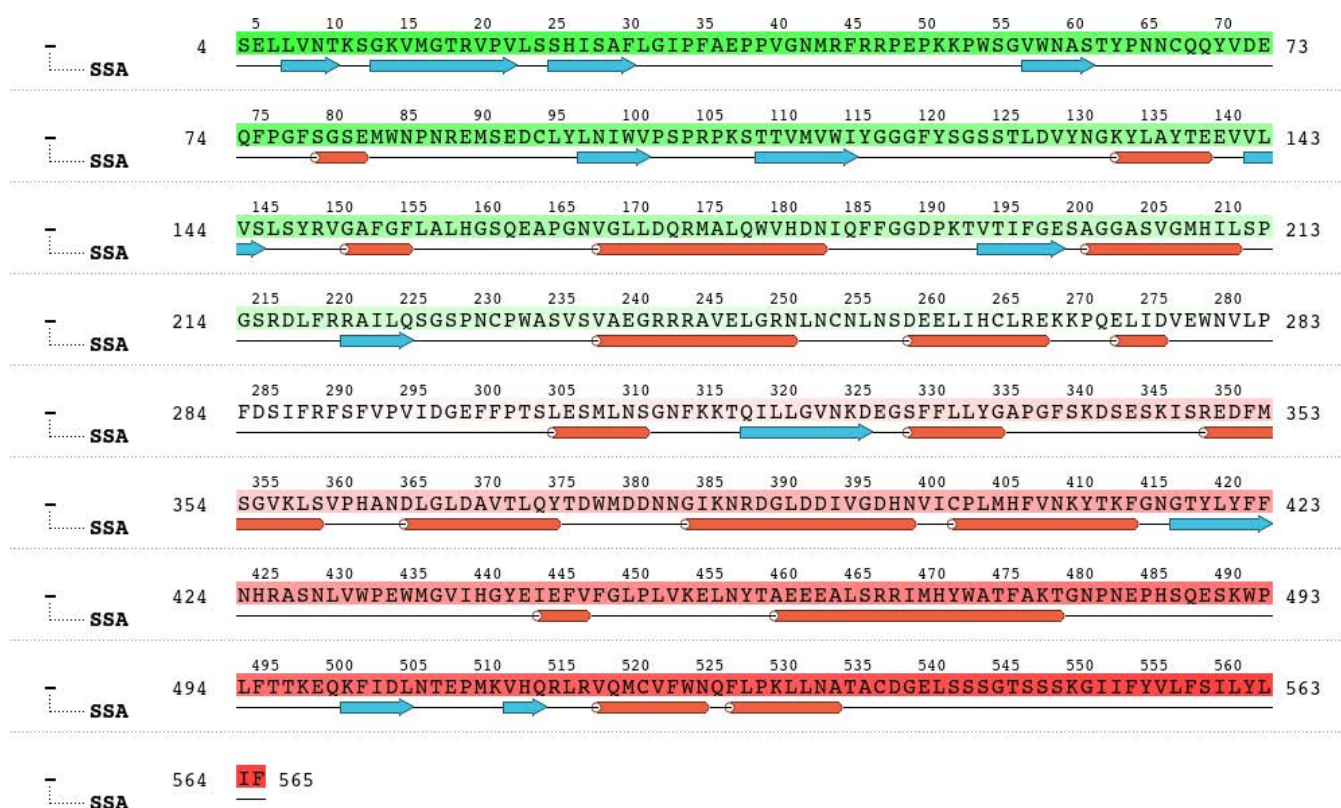

### Ligand Information

|                    |                                                                                                         |
|--------------------|---------------------------------------------------------------------------------------------------------|
| SMILES             | <chem>COc(c(c1)O)cc(c12)CC[NH2+][C@H]2Cc3cc(c(O)cc3)Oc(c4)c(OC)cc(c45)CC[NH2+][C@H]5Cc6ccc(O)cc6</chem> |
| PDB Name           | 'UNK'                                                                                                   |
| Num. of Atoms      | 80 (total) 42 (heavy)                                                                                   |
| Atomic Mass        | 570.692 au                                                                                              |
| Charge             | +2                                                                                                      |
| Mol. Formula       | C34H38N2O6                                                                                              |
| Num. of Fragments  | 3                                                                                                       |
| Num. of Rot. Bonds | 11                                                                                                      |

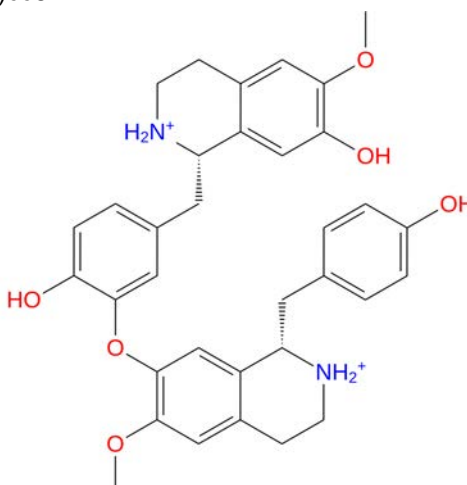



### Counter Ion/Salt Information

| Type | Num. | Concentration [mM] | Total Charge |
|------|------|--------------------|--------------|
| Na   | 58   | 58.736             | +58          |
| Cl   | 50   | 50.634             | -50          |

## Protein-Ligand RMSD

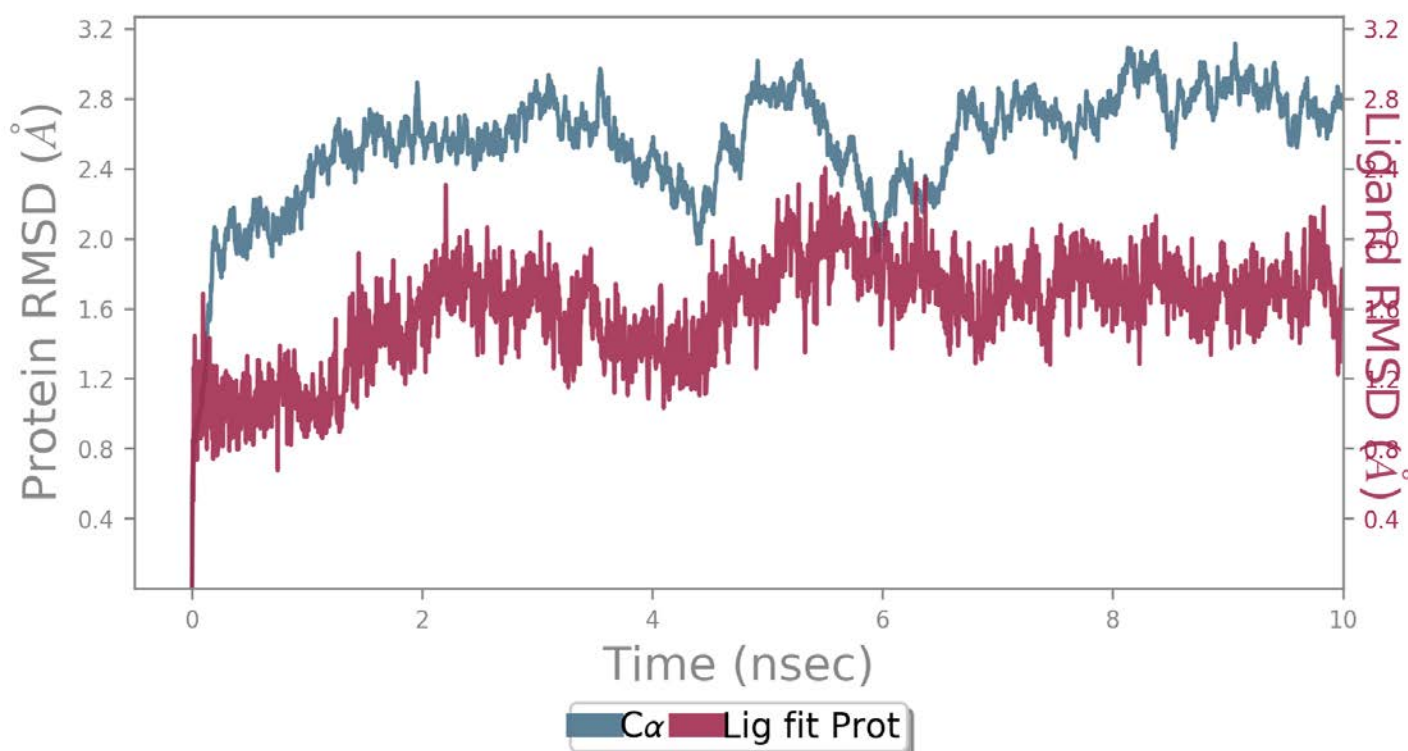

The Root Mean Square Deviation (RMSD) is used to measure the average change in displacement of a selection of atoms for a particular frame with respect to a reference frame. It is calculated for all frames in the trajectory. The RMSD for frame  $x$  is:

$$RMSD_x = \sqrt{\frac{1}{N} \sum_{i=1}^N (r'_i(t_x) - r_i(t_{ref}))^2}$$

where  $N$  is the number of atoms in the atom selection;  $t_{ref}$  is the reference time, (typically the first frame is used as the reference and it is regarded as time  $t=0$ ); and  $r'$  is the position of the selected atoms in frame  $x$  after superimposing on the reference frame, where frame  $x$  is recorded at time  $t_x$ . The procedure is repeated for every frame in the simulation trajectory.

**Protein RMSD:** The above plot shows the RMSD evolution of a protein (left Y-axis). All protein frames are first aligned on the reference frame backbone, and then the RMSD is calculated based on the atom selection. Monitoring the RMSD of the protein can give insights into its structural conformation throughout the simulation. RMSD analysis can indicate if the simulation has equilibrated — its fluctuations towards the end of the simulation are around some thermal average structure. Changes of the order of 1-3 Å are perfectly acceptable for small, globular proteins. Changes much larger than that, however, indicate that the protein is undergoing a large conformational change during the simulation. It is also important that your simulation converges — the RMSD values stabilize around a fixed value. If the RMSD of the protein is still increasing or decreasing on average at the end of the simulation, then your system has not equilibrated, and your simulation may not be long enough for rigorous analysis.

**Ligand RMSD:** Ligand RMSD (right Y-axis) indicates how stable the ligand is with respect to the protein and its binding pocket. In the above plot, 'Lig fit Prot' shows the RMSD of a ligand when the protein-ligand complex is first aligned on the protein backbone of the reference and then the RMSD of the ligand heavy atoms is measured. If the values observed are significantly larger than the RMSD of the protein, then it is likely that the ligand has diffused away from its initial binding site.

## Protein RMSF

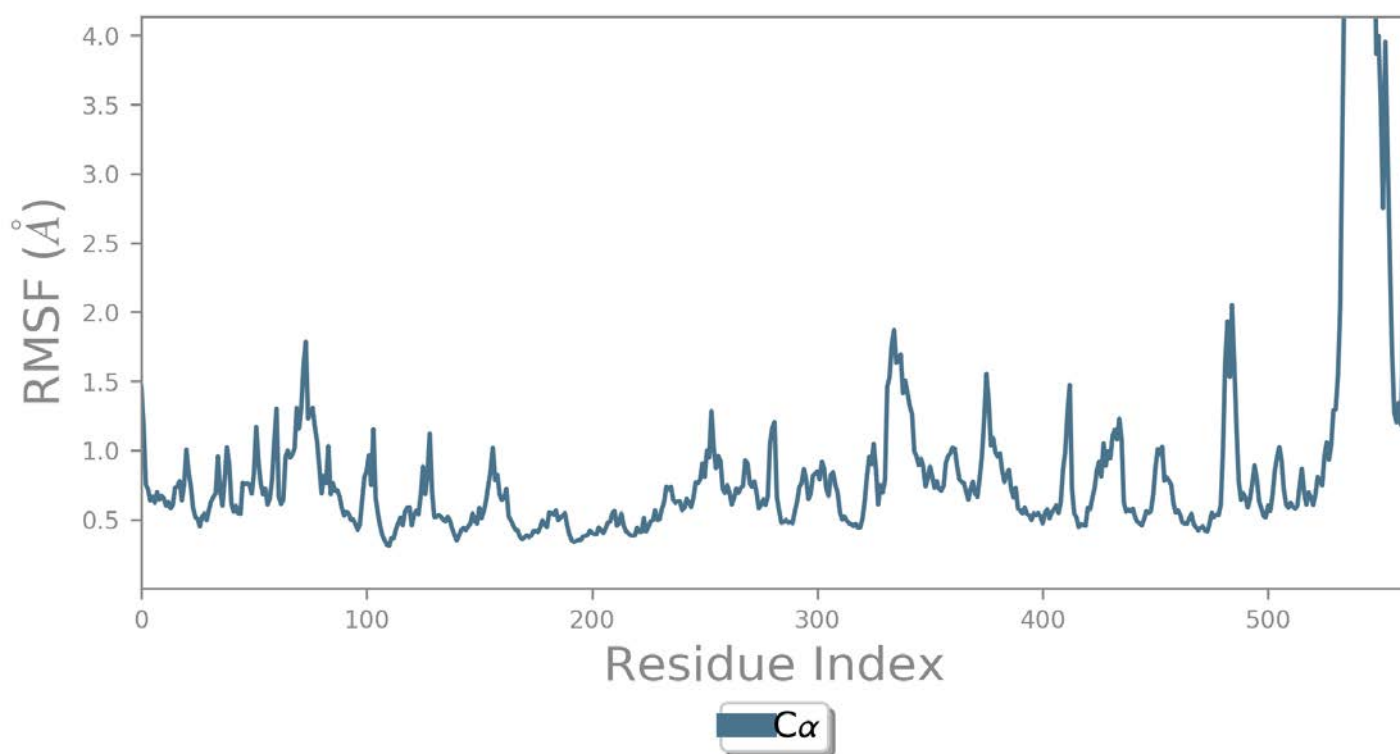

The Root Mean Square Fluctuation (RMSF) is useful for characterizing local changes along the protein chain. The RMSF for residue  $i$  is:

$$RMSF_i = \sqrt{\frac{1}{T} \sum_{t=1}^T \langle (r'_i(t)) - r_i(t_{ref})^2 \rangle}$$

where  $T$  is the trajectory time over which the RMSF is calculated,  $t_{ref}$  is the reference time,  $r_i$  is the position of residue  $i$ ;  $r'$  is the position of atoms in residue  $i$  after superposition on the reference, and the angle brackets indicate that the average of the square distance is taken over the selection of atoms in the residue.

On this plot, peaks indicate areas of the protein that fluctuate the most during the simulation. Typically you will observe that the tails ( $N$ - and  $C$ -terminal) fluctuate more than any other part of the protein. Secondary structure elements like alpha helices and beta strands are usually more rigid than the unstructured part of the protein, and thus fluctuate less than the loop regions.

## Protein Secondary Structure

% Helix  
28.53

% Strand  
13.37

% Total SSE  
41.90

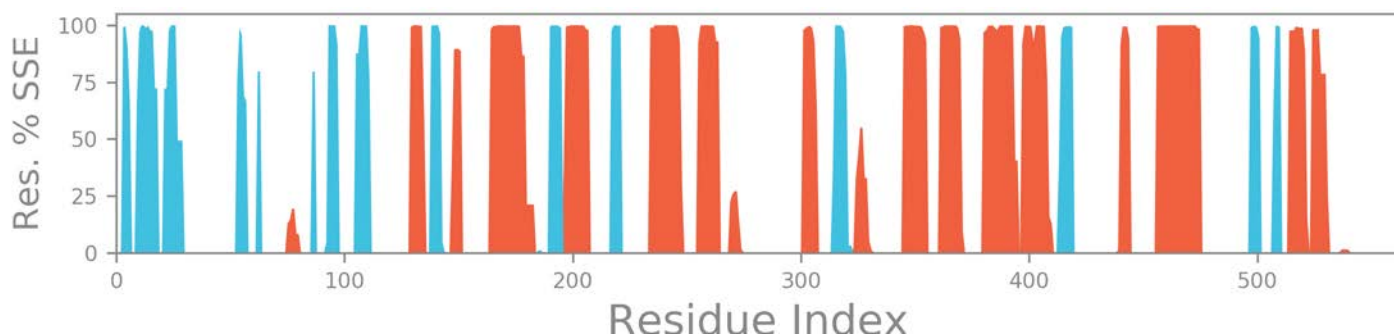

Protein secondary structure elements (SSE) like **alpha-helices** and **beta-strands** are monitored throughout the simulation. The plot above reports SSE distribution by residue index throughout the protein structure. The plot below summarizes the SSE composition for each trajectory frame over the course of the simulation, and the plot at the bottom monitors each residue and its SSE assignment over time.

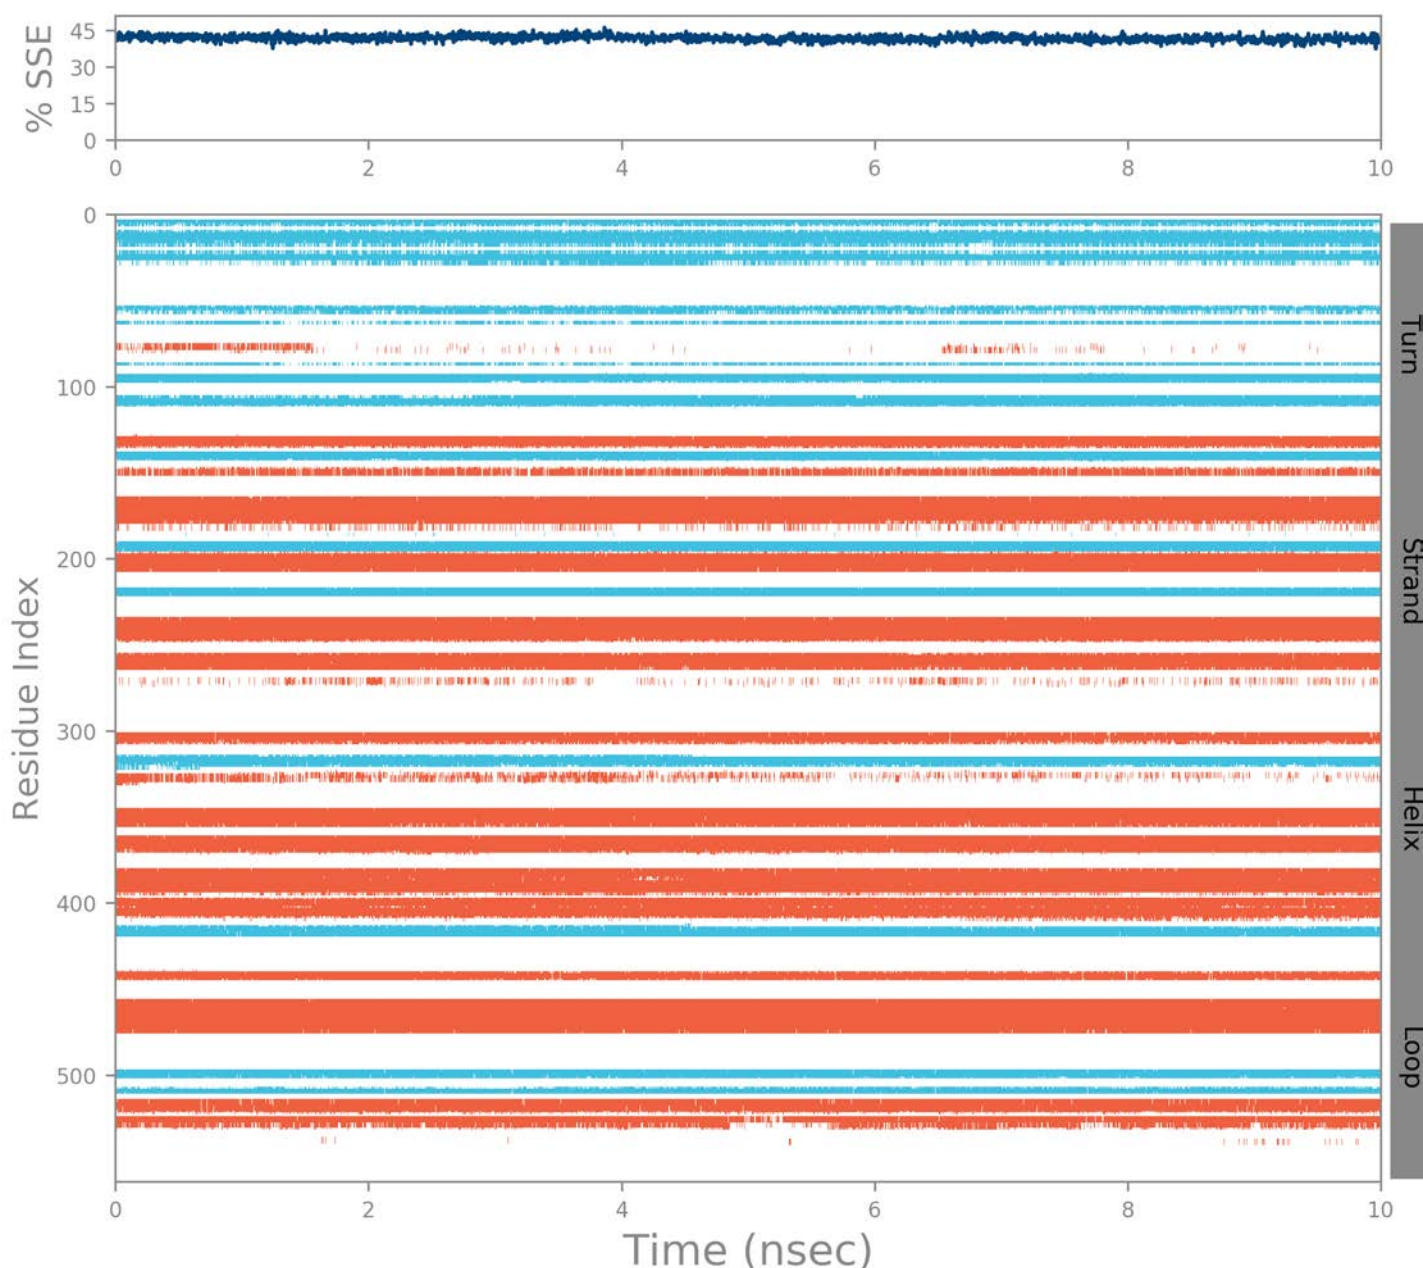

## RMSF of Lindholdamine Isomer Ligand

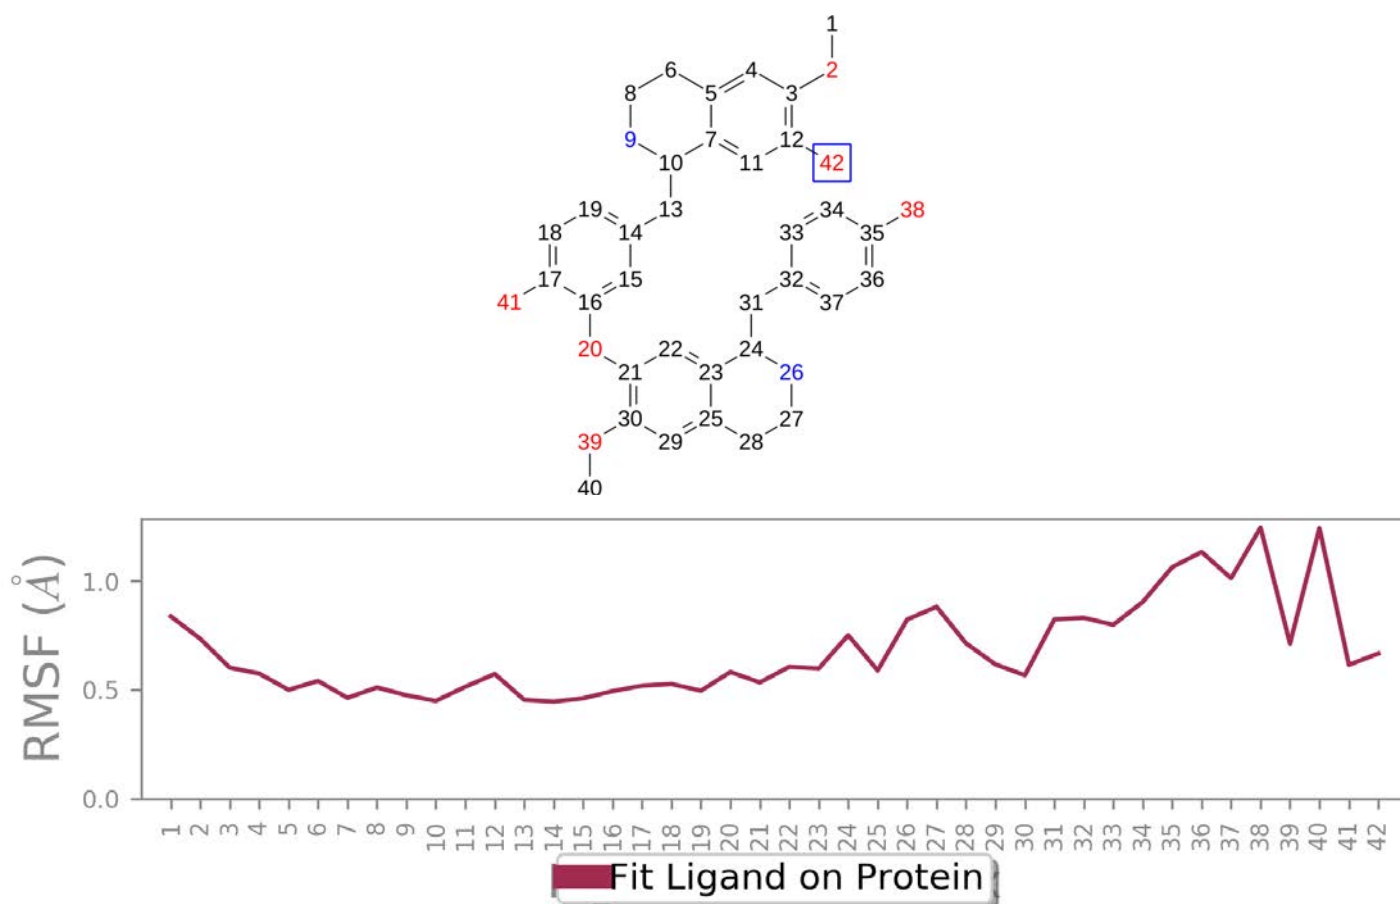

The Ligand Root Mean Square Fluctuation (L-RMSF) is useful for characterizing changes in the ligand atom positions. The RMSF for atom  $i$  is:

$$RMSF_i = \sqrt{\frac{1}{T} \sum_{t=1}^T (r'_i(t) - r_i(t_{ref}))^2}$$

where  $T$  is the trajectory time over which the RMSF is calculated,  $t_{ref}$  is the reference time (usually for the first frame, and is regarded as the zero of time);  $r$  is the position of atom  $i$  in the reference at time  $t_{ref}$  and  $r'$  is the position of atom  $i$  at time  $t$  after superposition on the reference frame.

Ligand RMSF shows the ligand's fluctuations broken down by atom, corresponding to the 2D structure in the top panel. The ligand RMSF may give you insights on how ligand fragments interact with the protein and their entropic role in the binding event. In the bottom panel, the 'Fit Ligand on Protein' line shows the ligand fluctuations, with respect to the protein. The protein-ligand complex is first aligned on the protein backbone and then the ligand RMSF is measured on the ligand heavy atoms.



## Protein-Ligand Contacts

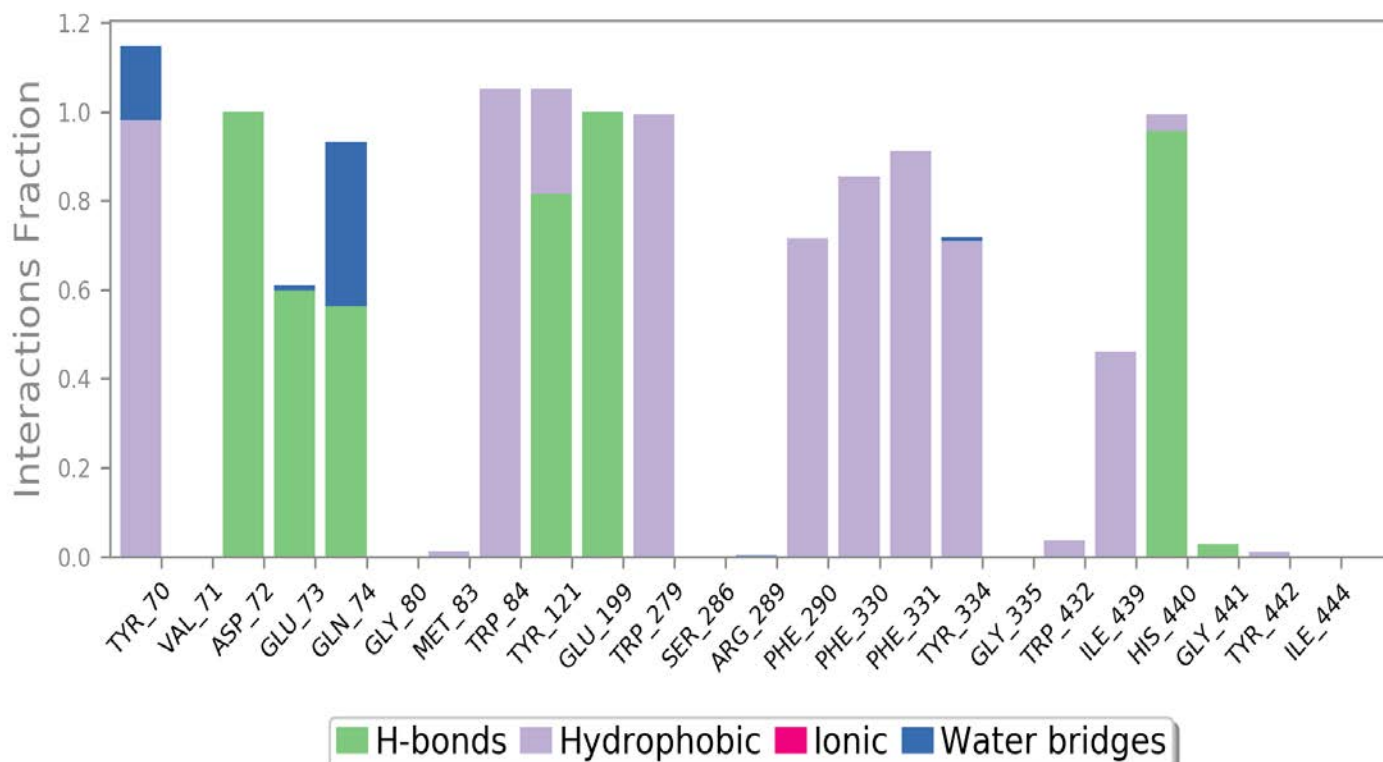

Protein interactions with the ligand can be monitored throughout the simulation. These interactions can be categorized by type and summarized, as shown in the plot above. Protein-ligand interactions (or 'contacts') are categorized into four types: Hydrogen Bonds, Hydrophobic, Ionic and Water Bridges. Each interaction type contains more specific subtypes, which can be explored through the 'Simulation Interactions Diagram' panel. The stacked bar charts are normalized over the course of the trajectory: for example, a value of 0.7 suggests that 70% of the simulation time the specific interaction is maintained. Values over 1.0 are possible as some protein residue may make multiple contacts of same subtype with the ligand.

**Hydrogen Bonds:** (H-bonds) play a significant role in ligand binding. Consideration of hydrogen-bonding properties in drug design is important because of their strong influence on drug specificity, metabolism and adsorption. Hydrogen bonds between a protein and a ligand can be further broken down into four subtypes: backbone acceptor; backbone donor; side-chain acceptor; side-chain donor.

The current geometric criteria for protein-ligand H-bond is: distance of 2.5 Å between the donor and acceptor atoms (D—H...A); a donor angle of  $\geq 120^\circ$  between the donor-hydrogen-acceptor atoms (D—H...A); and an acceptor angle of  $\geq 90^\circ$  between the hydrogen-acceptor-bonded\_atom atoms (H...A—X).

**Hydrophobic contacts:** fall into three subtypes:  $\pi$ -Cation;  $\pi$ - $\pi$ ; and Other, non-specific interactions. Generally these type of interactions involve a hydrophobic amino acid and an aromatic or aliphatic group on the ligand, but we have extended this category to also include  $\pi$ -Cation interactions.

The current geometric criteria for hydrophobic interactions is as follows:  $\pi$ -Cation — Aromatic and charged groups within 4.5 Å;  $\pi$ - $\pi$  — Two aromatic groups stacked face-to-face or face-to-edge; Other — A non-specific hydrophobic sidechain within 3.6 Å of a ligand's aromatic or aliphatic carbons.

**Ionic interactions:** or polar interactions, are between two oppositely charged atoms that are within 3.7 Å of each other and do not involve a hydrogen bond. We also monitor Protein-Metal-Ligand interactions, which are defined by a metal ion coordinated within 3.4 Å of protein's and ligand's heavy atoms (except carbon). All ionic interactions are broken down into two subtypes: those mediated by a protein backbone or side chains.

**Water Bridges:** are hydrogen-bonded protein-ligand interactions mediated by a water molecule. The hydrogen-bond geometry is slightly relaxed from the standard H-bond definition.

The current geometric criteria for a protein-water or water-ligand H-bond are: a distance of 2.8 Å between the donor and acceptor atoms (D—H...A); a donor angle of  $\geq 110^\circ$  between the donor-hydrogen-acceptor atoms (D—H...A); and an acceptor angle of  $\geq 90^\circ$  between the hydrogen-acceptor-bonded\_atom atoms (H...A—X).

## Protein-Ligand Contacts (cont.)

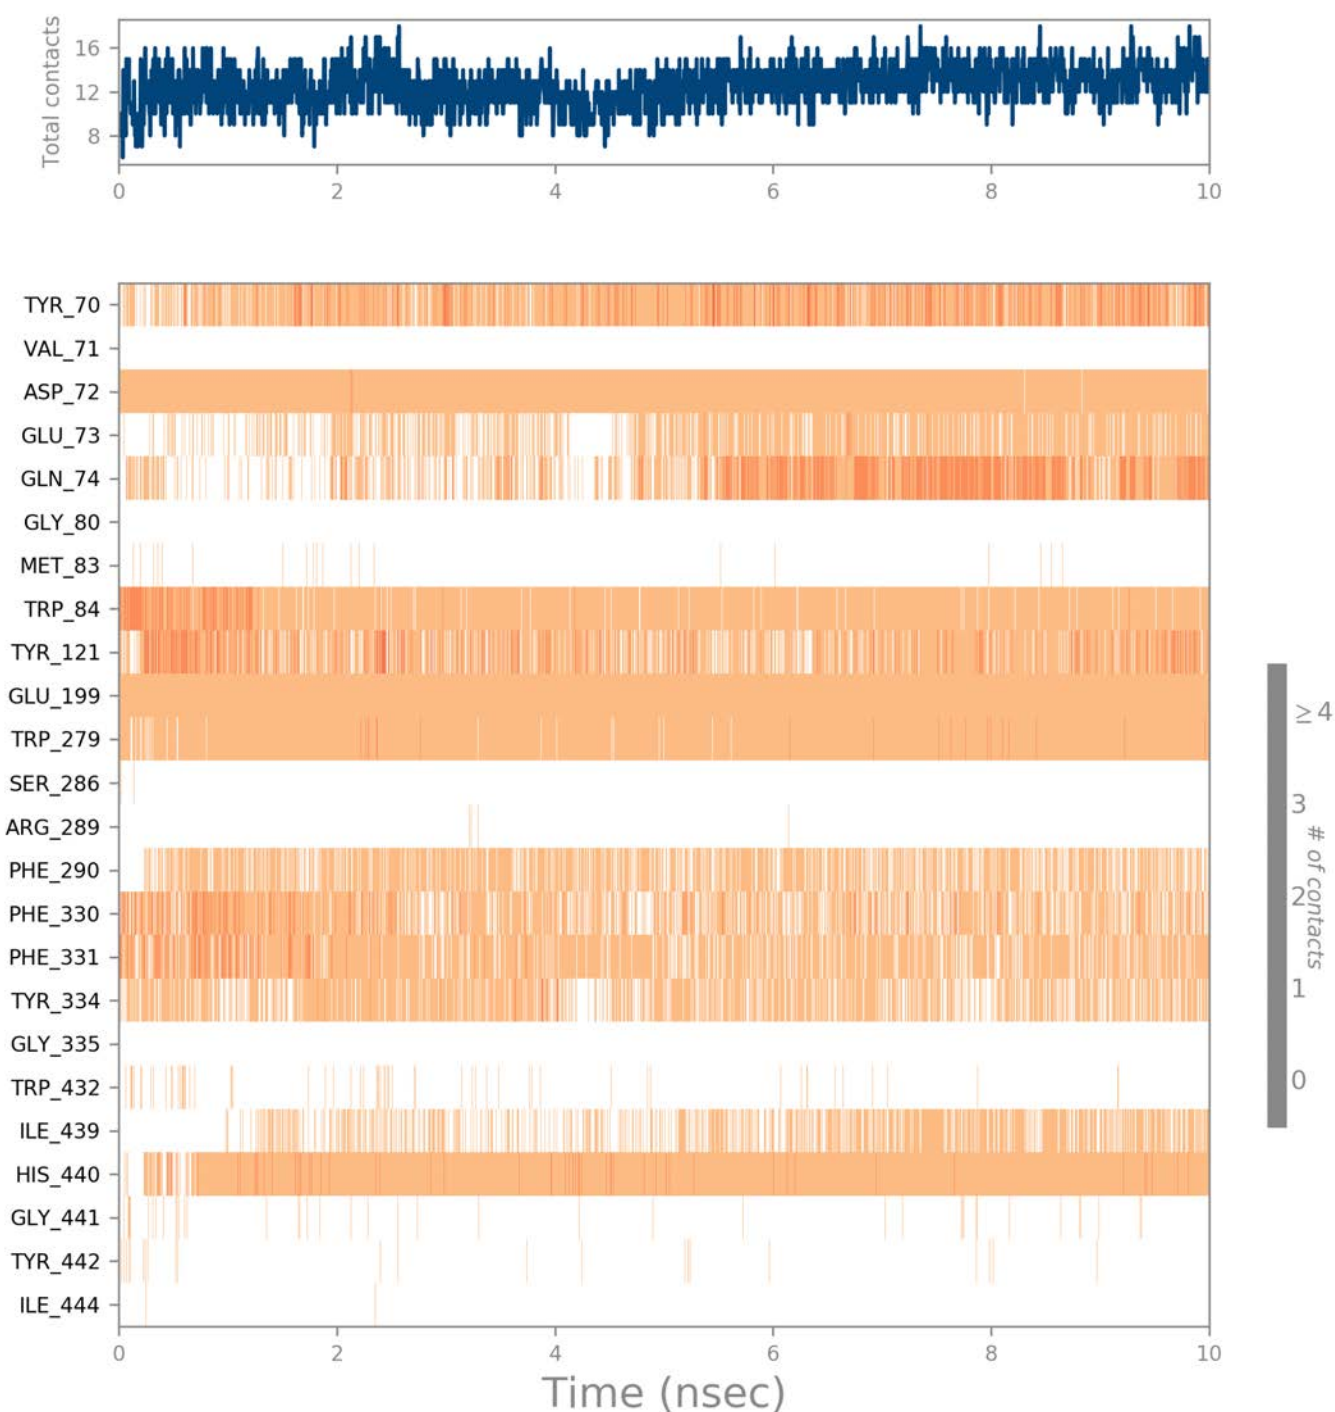

A timeline representation of the interactions and contacts (**H-bonds, Hydrophobic, Ionic, Water bridges**) summarized in the previous page. The top panel shows the total number of specific contacts the protein makes with the ligand over the course of the trajectory. The bottom panel shows which residues interact with the ligand in each trajectory frame. Some residues make more than one specific contact with the ligand, which is represented by a darker shade of orange, according to the scale to the right of the plot.

## Ligand-Protein Contacts

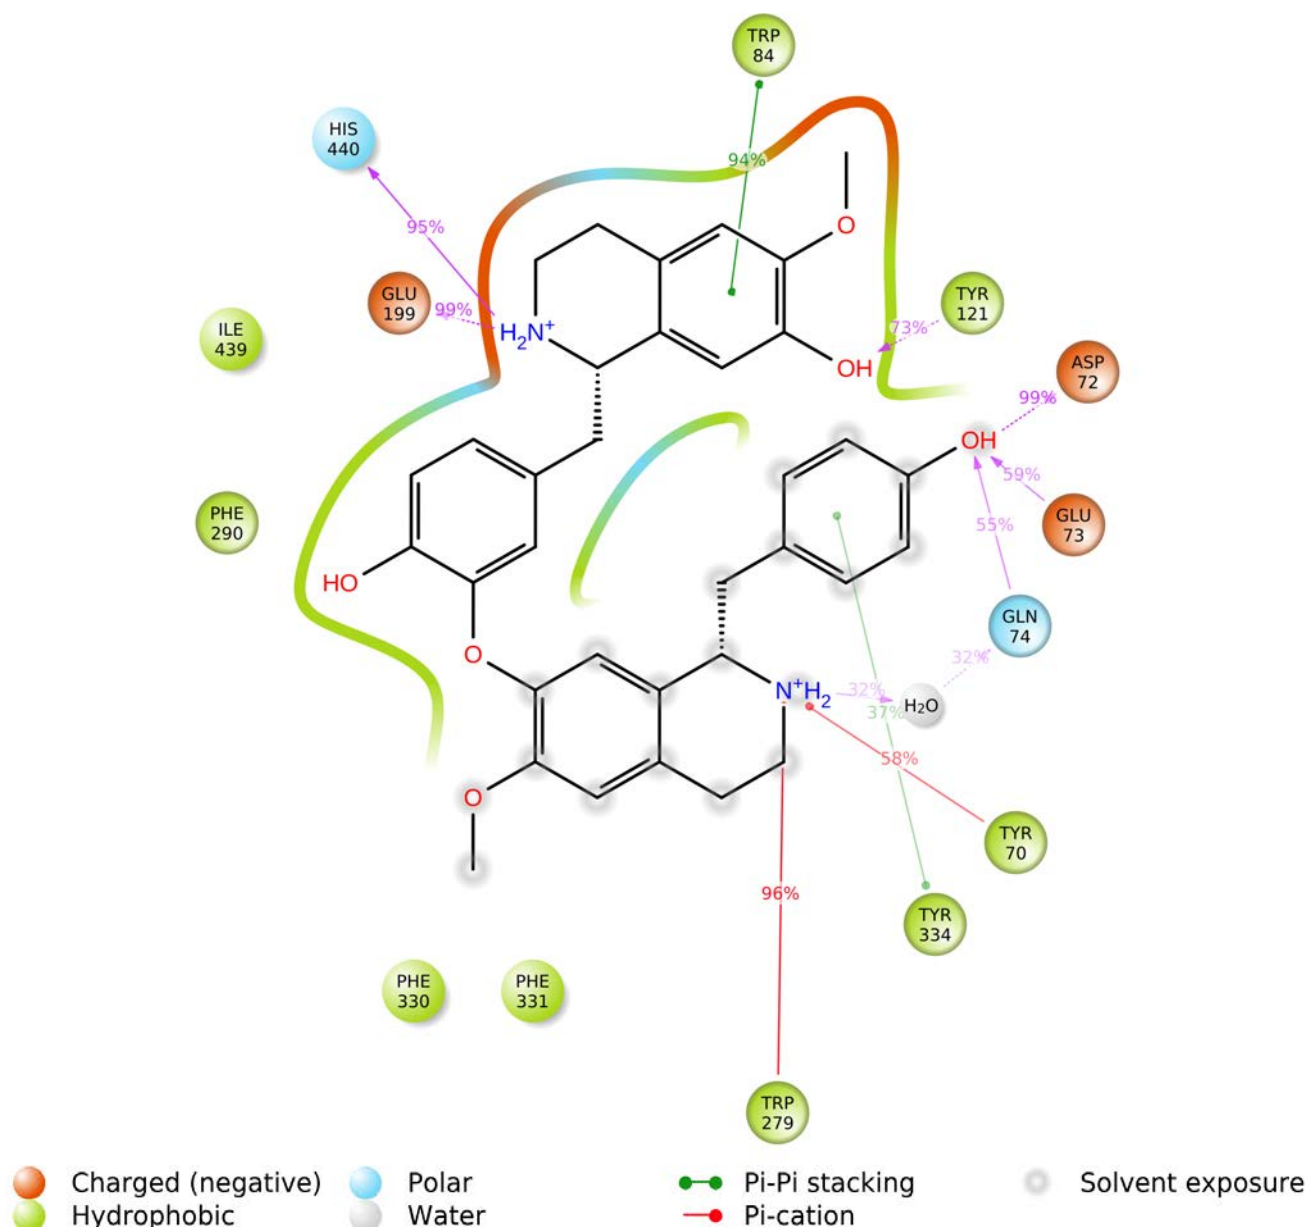

A schematic of detailed ligand atom interactions with the protein residues. Interactions that occur more than **30.0%** of the simulation time in the selected trajectory ( 0.00 through 10.00 nsec), are shown.

Note: it is possible to have interactions with >100% as some residues may have multiple interactions of a single type with the same ligand atom. For example, the ARG side chain has four H-bond donors that can all hydrogen-bond to a single H-bond acceptor.



## Ligand Torsion Profile

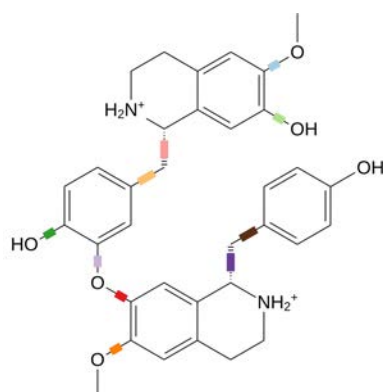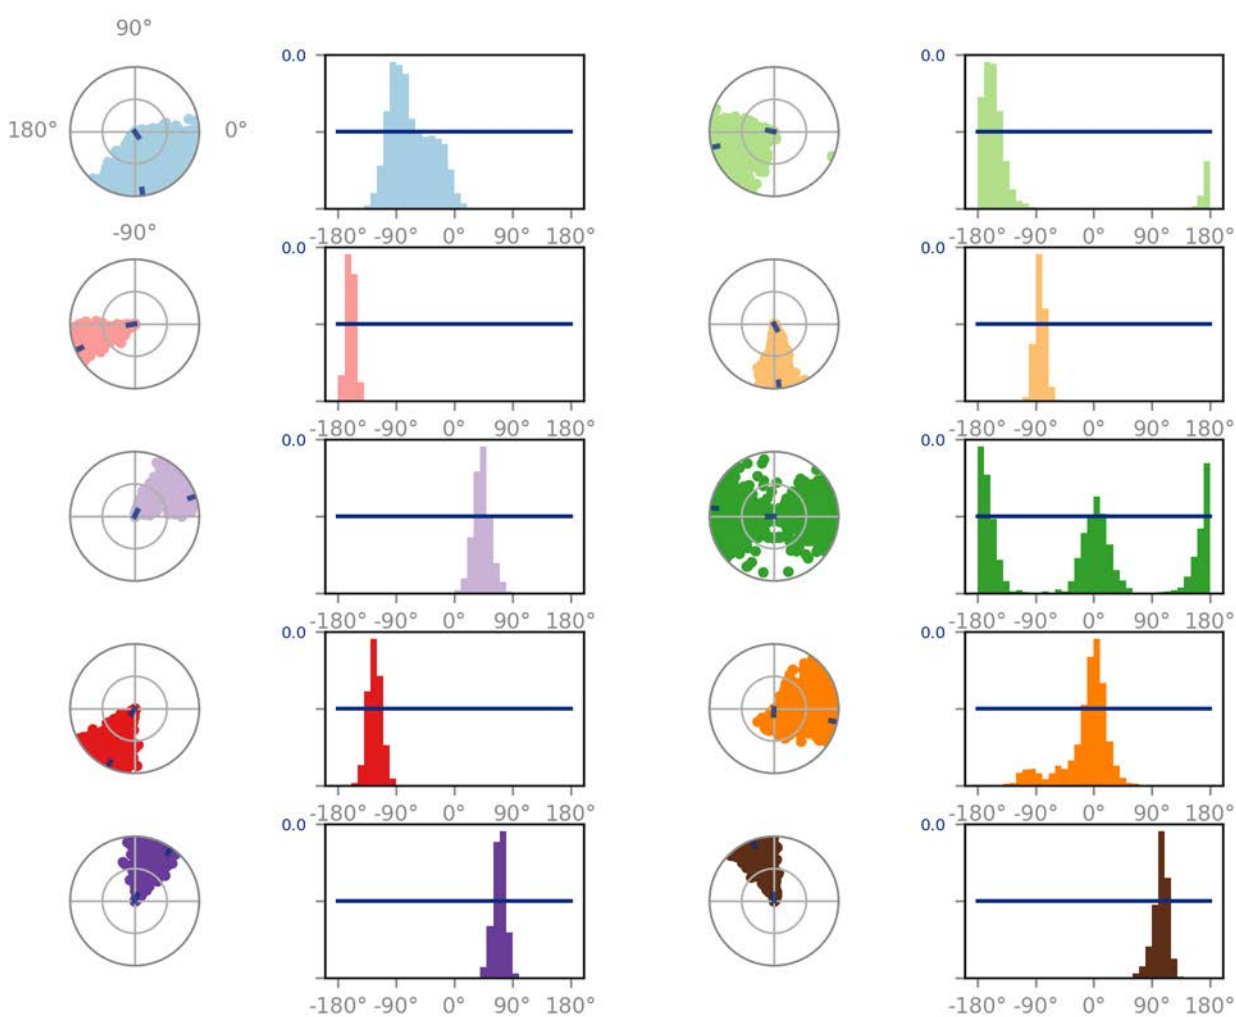

## Ligand Torsion Profile (cont.)

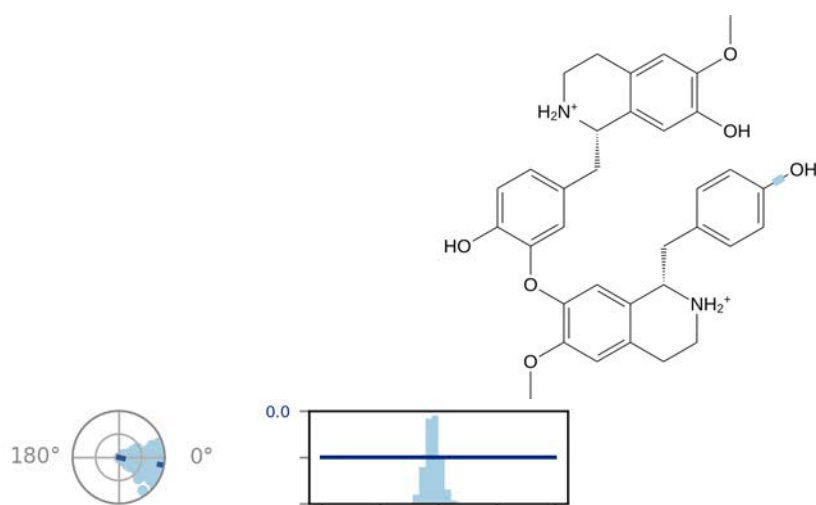

The ligand torsions plot summarizes the conformational evolution of every rotatable bond (RB) in the ligand throughout the simulation trajectory ( 0.00 through 10.00 nsec). The top panel shows the 2d schematic of a ligand with color-coded rotatable bonds. Each rotatable bond torsion is accompanied by a dial plot and bar plots of the same color.

Dial (or radial) plots describe the conformation of the torsion throughout the course of the simulation. The beginning of the simulation is in the center of the radial plot and the time evolution is plotted radially outwards.

The bar plots summarize the data on the dial plots, by showing the probability density of the torsion. If torsional potential information is available, the plot also shows the potential of the rotatable bond (by summing the potential of the related torsions). The values of the potential are on the left Y-axis of the chart, and are expressed in *kcal/mol*. Looking at the histogram and torsion potential relationships may give insights into the conformational strain the ligand undergoes to maintain a protein-bound conformation.

## Ligand Properties

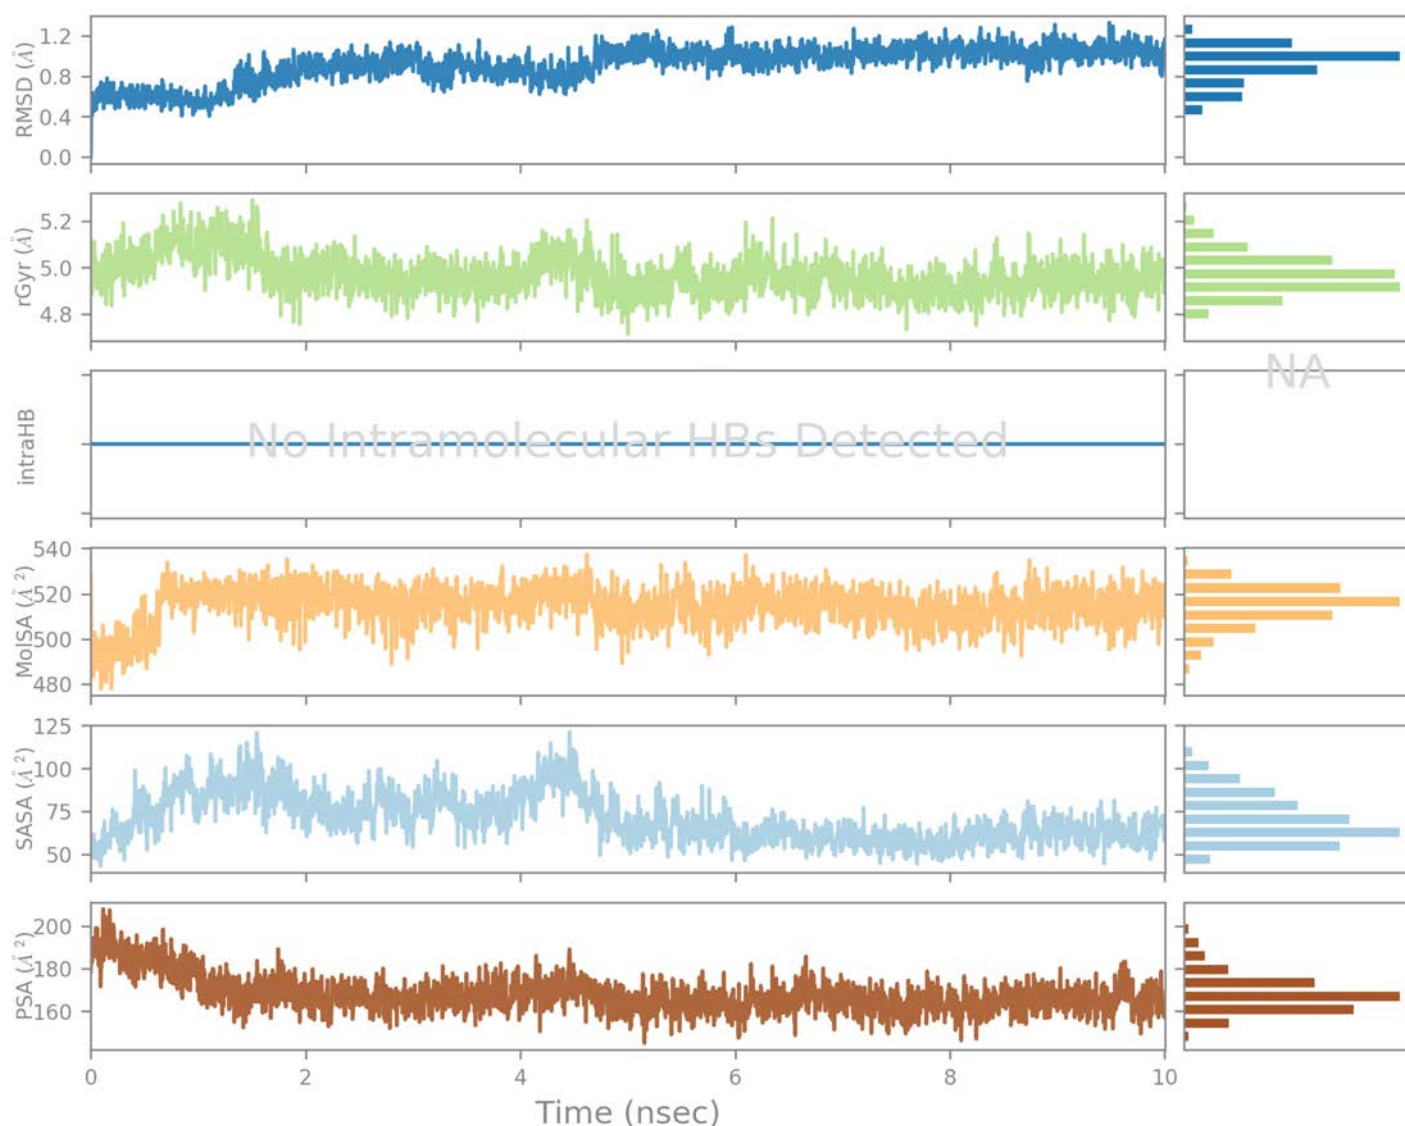

**Ligand RMSD:** Root mean square deviation of a ligand with respect to the reference conformation (typically the first frame is used as the reference and it is regarded as time  $t=0$ ).

**Radius of Gyration (rGyr):** Measures the 'extendedness' of a ligand, and is equivalent to its principal moment of inertia.

**Intramolecular Hydrogen Bonds (intraHB):** Number of internal hydrogen bonds (HB) within a ligand molecule.

**Molecular Surface Area (MolSA):** Molecular surface calculation with 1.4 Å probe radius. This value is equivalent to a van der Waals surface area.

**Solvent Accessible Surface Area (SASA):** Surface area of a molecule accessible by a water molecule.

**Polar Surface Area (PSA):** Solvent accessible surface area in a molecule contributed only by oxygen and nitrogen atoms.

## Report S3

# MD Simulation Report on AChE - Stepharine Interactions

### Simulation Details

Jobname: md\_job\_6H12\_2-dock-2  
Entry title: 2-dock-2

| CPU # | Job Type | Ensemble | Temp. [K] | Sim. Time [ns] | # Atoms | # Waters | Charge |
|-------|----------|----------|-----------|----------------|---------|----------|--------|
| 1     | mdsim    | NPT      | 300.0     | 10.005         | 62796   | 17949    | 0      |

### Protein Information

| Tot. Residues | Prot. Chain(s) | Res. in Chain(s)  | # Atoms | # Heavy Atoms | Charge |
|---------------|----------------|-------------------|---------|---------------|--------|
| 562           | 'NoChainId'    | ict_values([562]) | 8798    | 4471          | -10    |

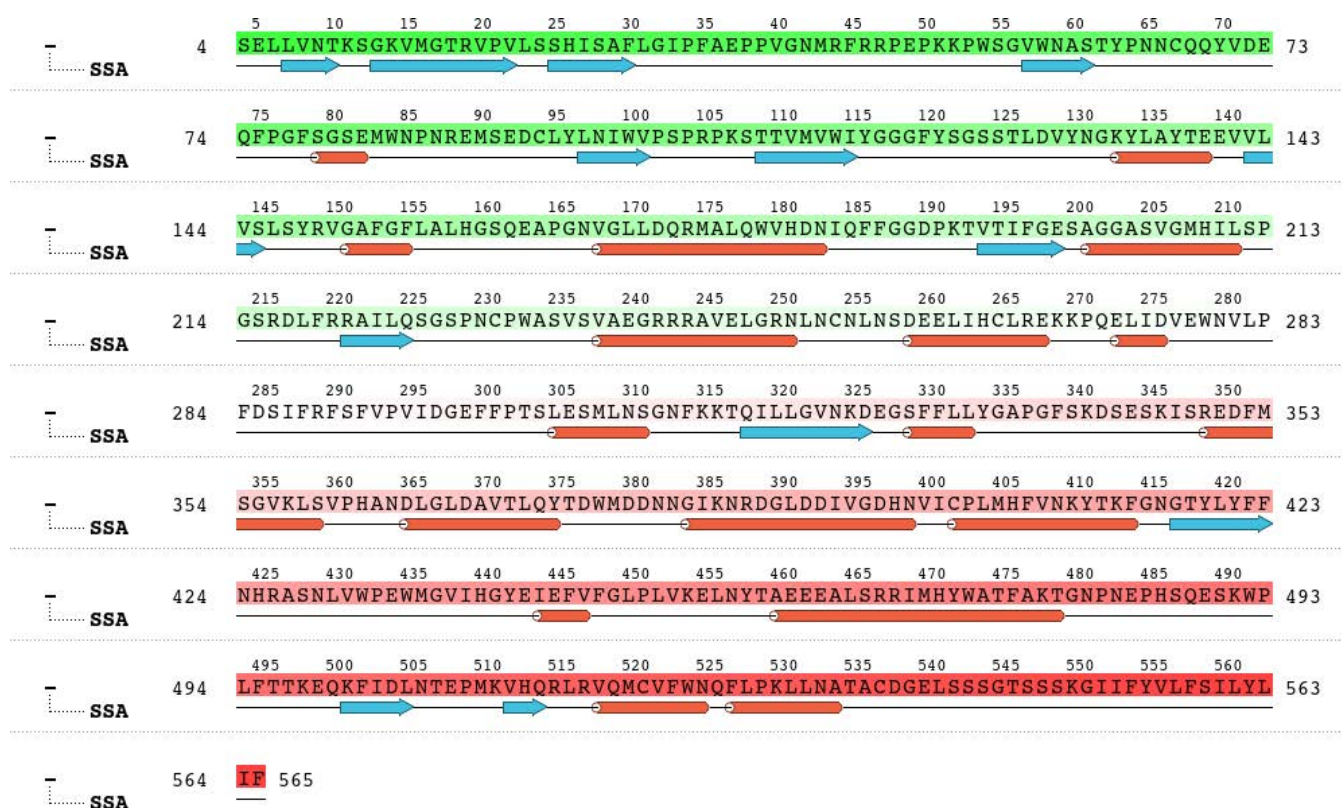

### Ligand Information

|                    |                                                   |
|--------------------|---------------------------------------------------|
| SMILES             | COc1c(OC)cc(CC[NH2+])[C@H]2C3)c2c1C34C=CC(=O)C=C4 |
| PDB Name           | 'UNK'                                             |
| Num. of Atoms      | 42 (total) 22 (heavy)                             |
| Atomic Mass        | 298.365 au                                        |
| Charge             | +1                                                |
| Mol. Formula       | C18H20NO3                                         |
| Num. of Fragments  | 1                                                 |
| Num. of Rot. Bonds | 2                                                 |

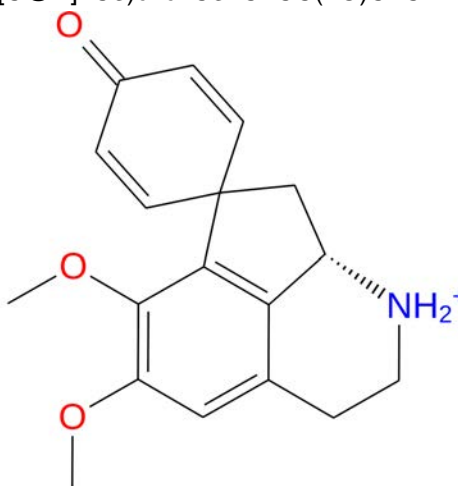

| Type | Num. | Concentration [mM] | Total Charge |
|------|------|--------------------|--------------|
| Na   | 59   | 59.765             | +59          |
| Cl   | 50   | 50.649             | -50          |

## Protein-Ligand RMSD

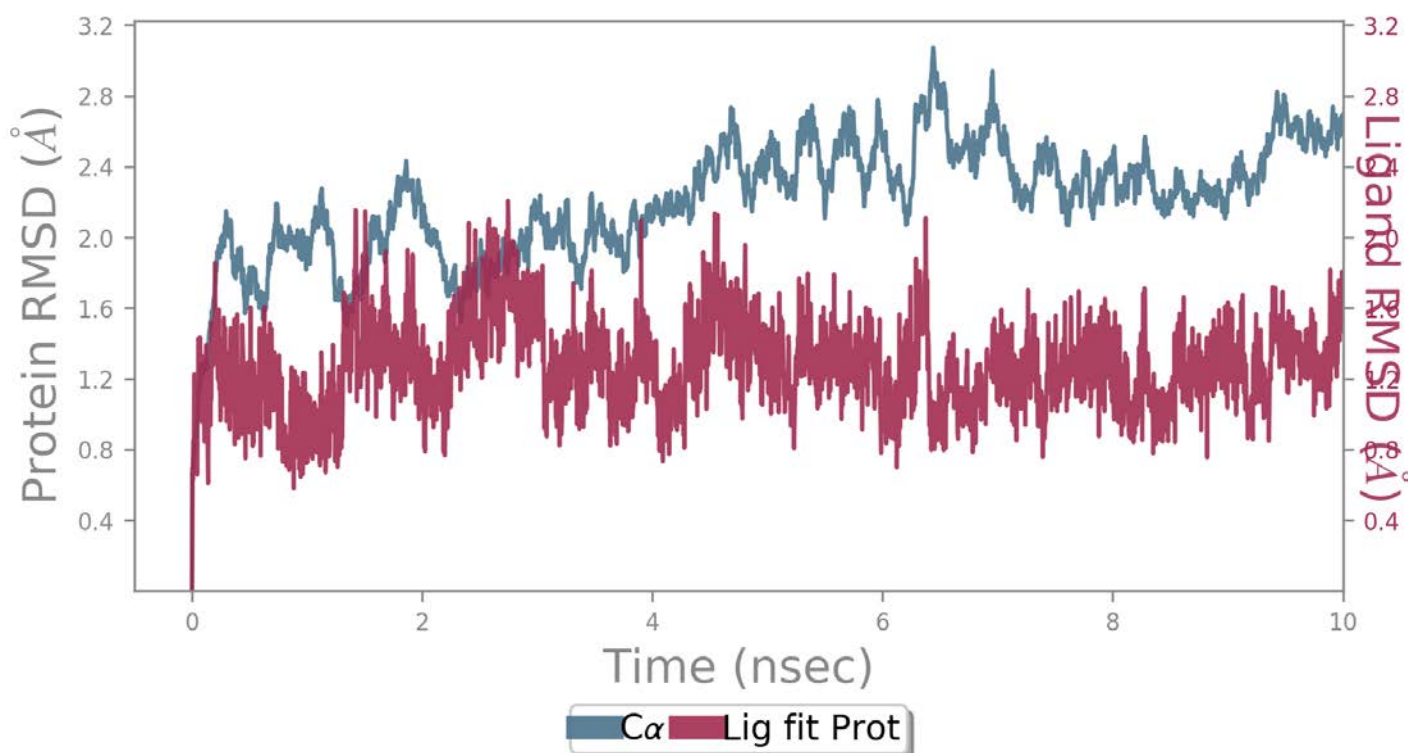

The Root Mean Square Deviation (RMSD) is used to measure the average change in displacement of a selection of atoms for a particular frame with respect to a reference frame. It is calculated for all frames in the trajectory. The RMSD for frame  $x$  is:

$$RMSD_x = \sqrt{\frac{1}{N} \sum_{i=1}^N (r'_i(t_x) - r_i(t_{ref}))^2}$$

where  $N$  is the number of atoms in the atom selection;  $t_{ref}$  is the reference time, (typically the first frame is used as the reference and it is regarded as time  $t=0$ ); and  $r'$  is the position of the selected atoms in frame  $x$  after superimposing on the reference frame, where frame  $x$  is recorded at time  $t_x$ . The procedure is repeated for every frame in the simulation trajectory.

**Protein RMSD:** The above plot shows the RMSD evolution of a protein (left Y-axis). All protein frames are first aligned on the reference frame backbone, and then the RMSD is calculated based on the atom selection. Monitoring the RMSD of the protein can give insights into its structural conformation throughout the simulation. RMSD analysis can indicate if the simulation has equilibrated — its fluctuations towards the end of the simulation are around some thermal average structure. Changes of the order of 1-3 Å are perfectly acceptable for small, globular proteins. Changes much larger than that, however, indicate that the protein is undergoing a large conformational change during the simulation. It is also important that your simulation converges — the RMSD values stabilize around a fixed value. If the RMSD of the protein is still increasing or decreasing on average at the end of the simulation, then your system has not equilibrated, and your simulation may not be long enough for rigorous analysis.

**Ligand RMSD:** Ligand RMSD (right Y-axis) indicates how stable the ligand is with respect to the protein and its binding pocket. In the above plot, 'Lig fit Prot' shows the RMSD of a ligand when the protein-ligand complex is first aligned on the protein backbone of the reference and then the RMSD of the ligand heavy atoms is measured. If the values observed are significantly larger than the RMSD of the protein, then it is likely that the ligand has diffused away from its initial binding site.



## Protein RMSF

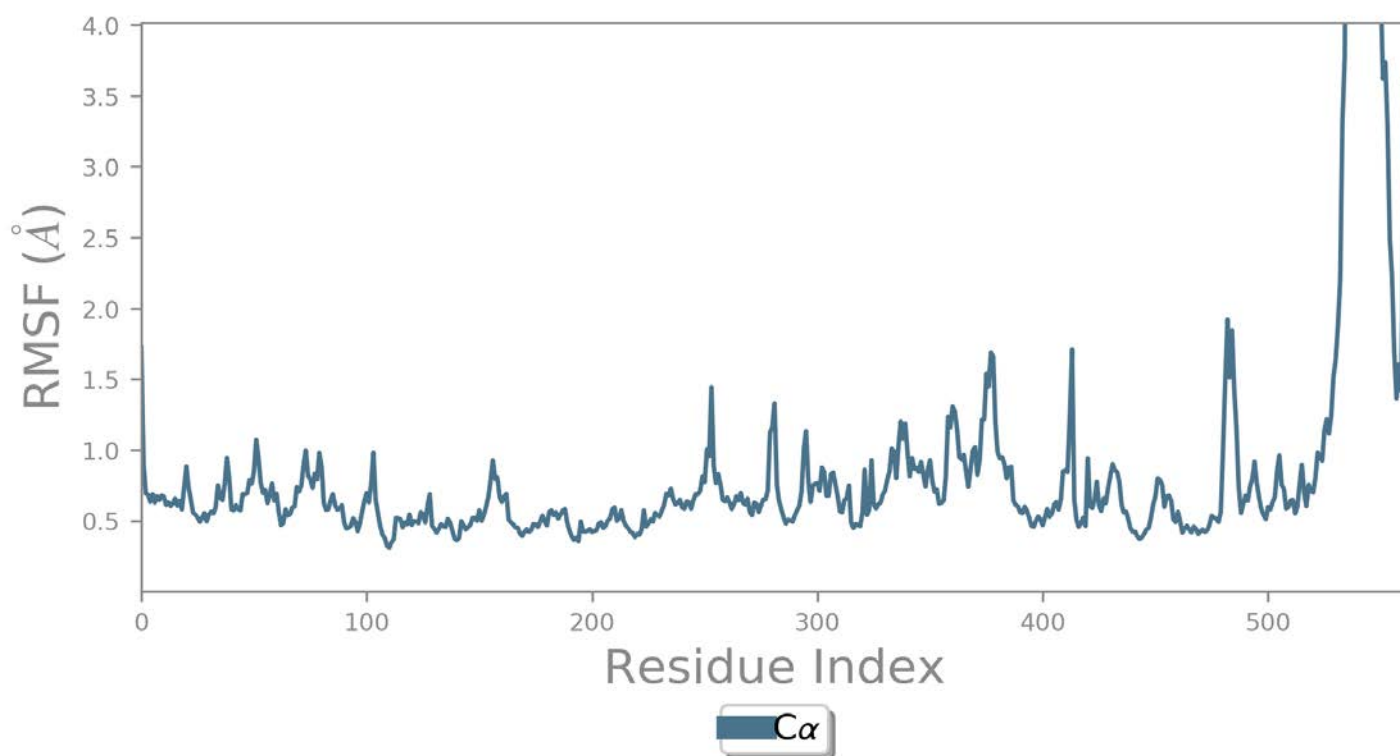

The Root Mean Square Fluctuation (RMSF) is useful for characterizing local changes along the protein chain. The RMSF for residue  $i$  is:

$$RMSF_i = \sqrt{\frac{1}{T} \sum_{t=1}^T \langle (r'_i(t)) - r_i(t_{ref})^2 \rangle}$$

where  $T$  is the trajectory time over which the RMSF is calculated,  $t_{ref}$  is the reference time,  $r_i$  is the position of residue  $i$ ;  $r'$  is the position of atoms in residue  $i$  after superposition on the reference, and the angle brackets indicate that the average of the square distance is taken over the selection of atoms in the residue.

On this plot, peaks indicate areas of the protein that fluctuate the most during the simulation. Typically you will observe that the tails ( $N$ - and  $C$ -terminal) fluctuate more than any other part of the protein. Secondary structure elements like alpha helices and beta strands are usually more rigid than the unstructured part of the protein, and thus fluctuate less than the loop regions.

## Protein Secondary Structure

% Helix  
28.80

% Strand  
13.08

% Total SSE  
41.88

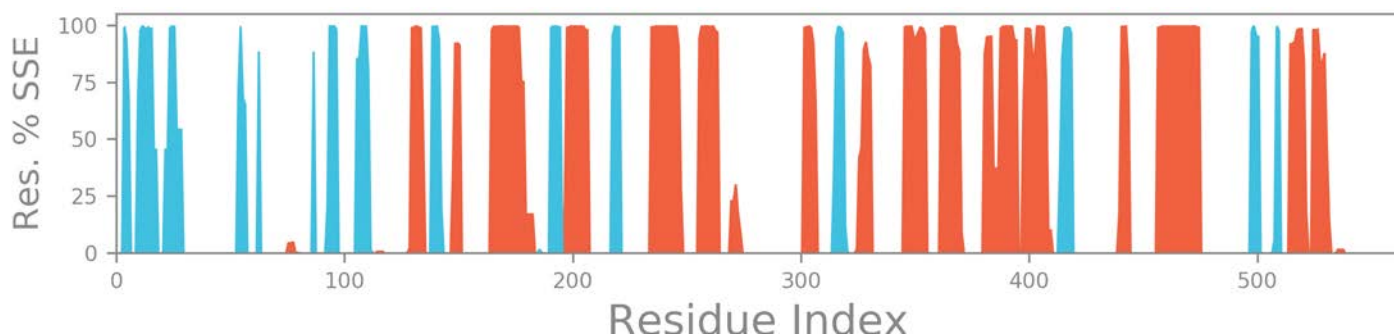

Protein secondary structure elements (SSE) like **alpha-helices** and **beta-strands** are monitored throughout the simulation. The plot above reports SSE distribution by residue index throughout the protein structure. The plot below summarizes the SSE composition for each trajectory frame over the course of the simulation, and the plot at the bottom monitors each residue and its SSE assignment over time.

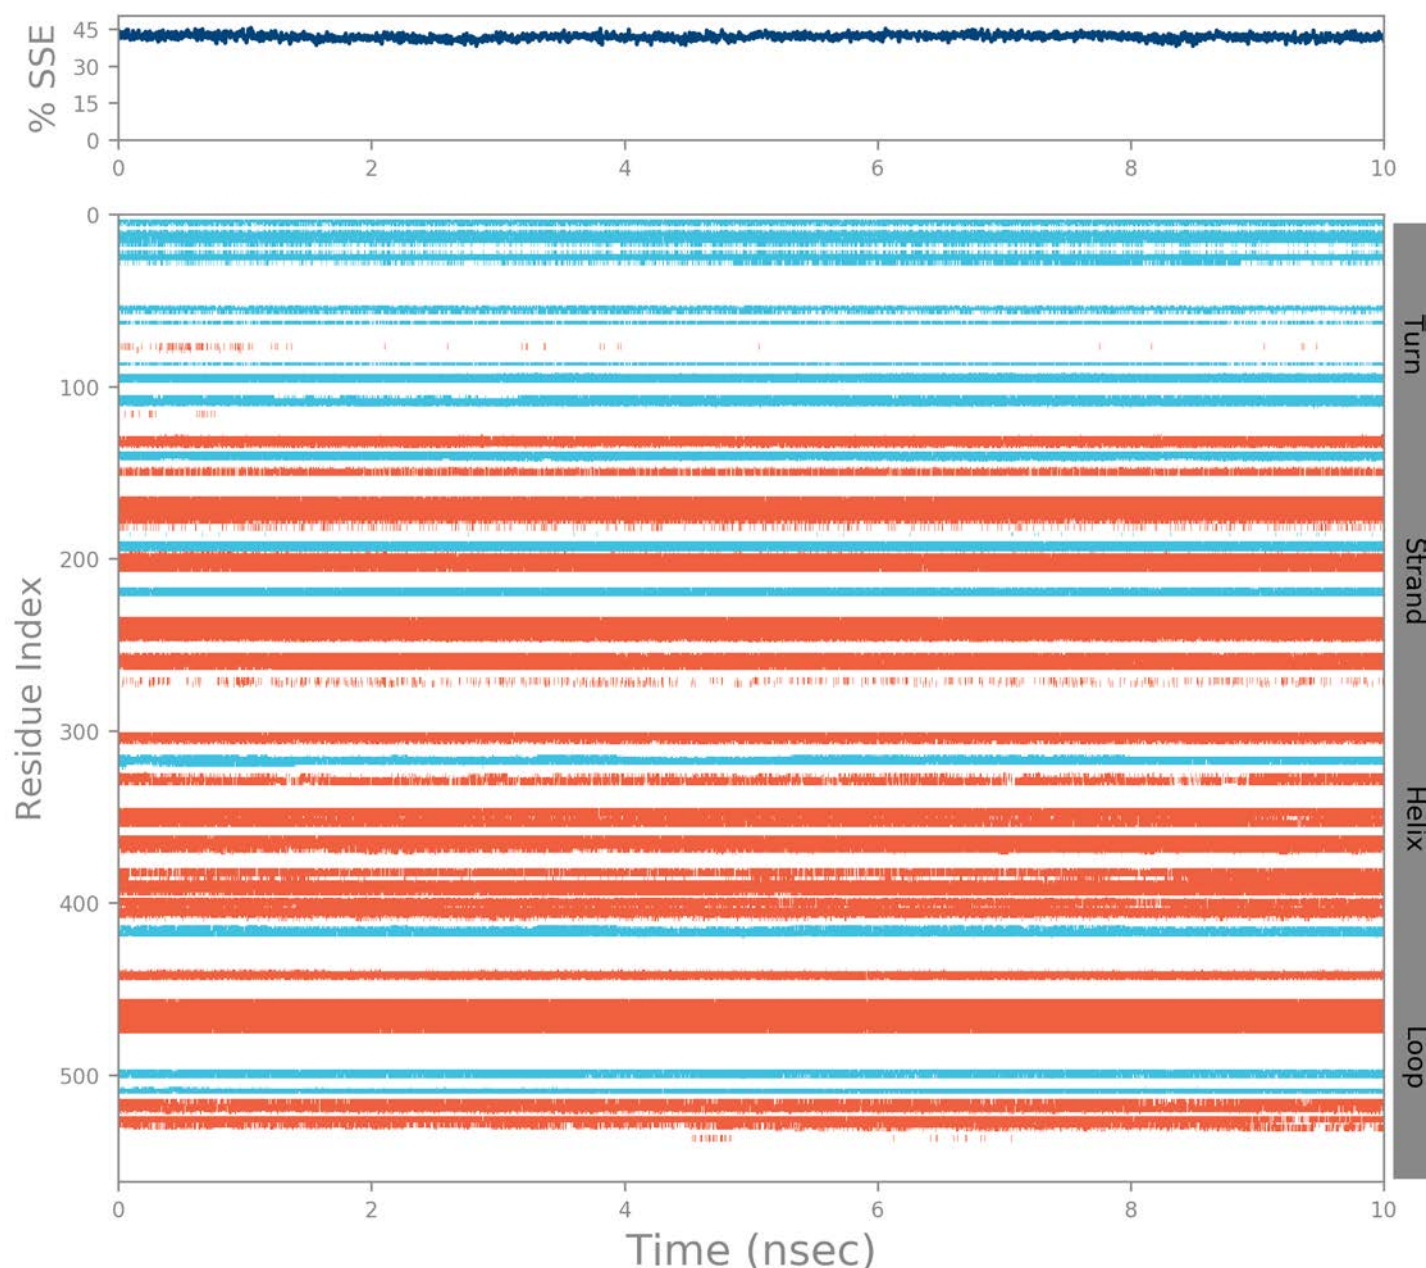



## Stepharine Ligand RMSF

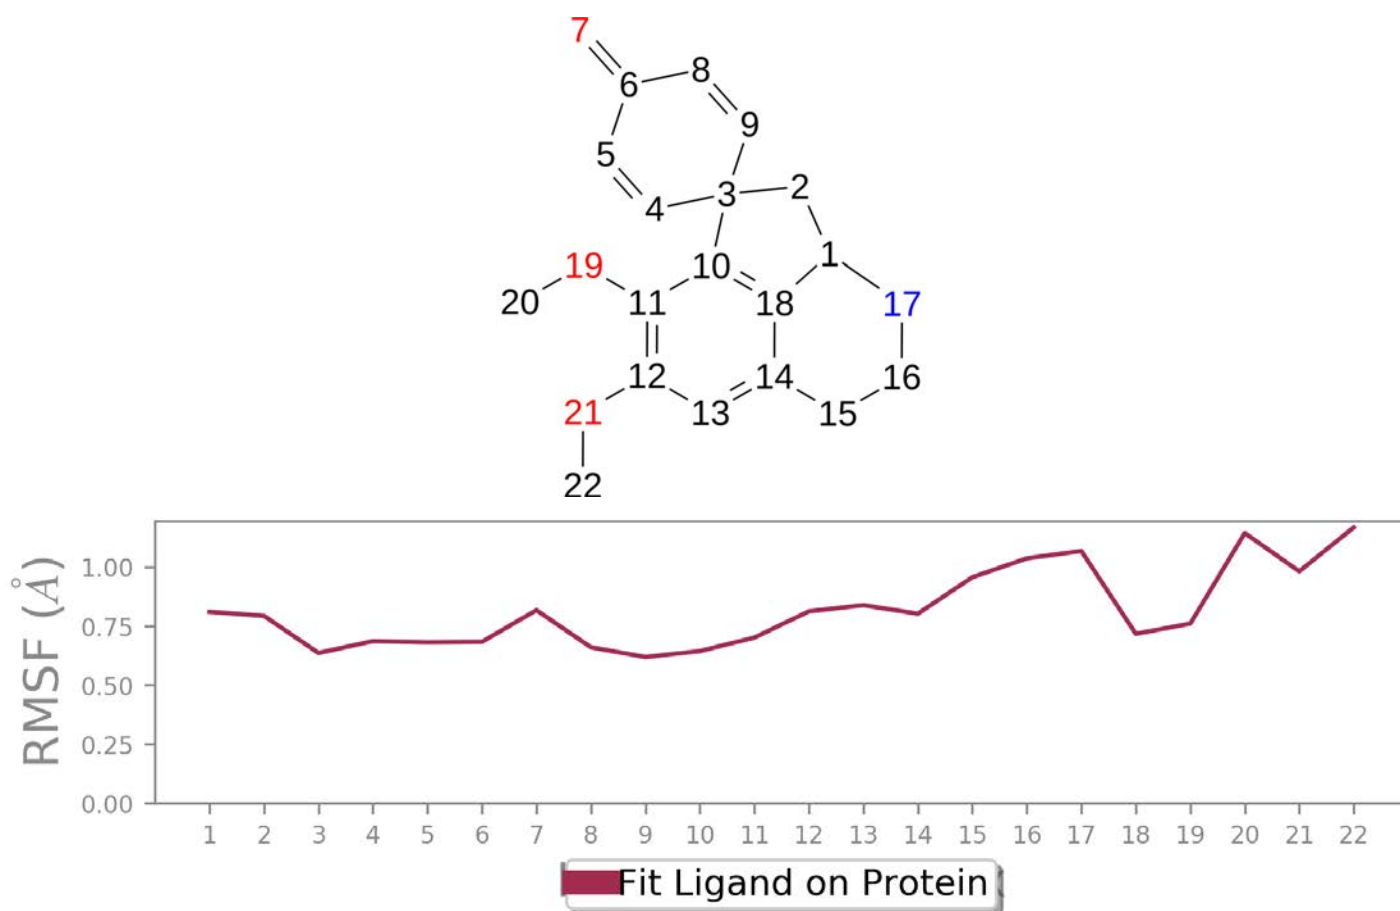

The Ligand Root Mean Square Fluctuation (L-RMSF) is useful for characterizing changes in the ligand atom positions. The RMSF for atom  $i$  is:

$$RMSF_i = \sqrt{\frac{1}{T} \sum_{t=1}^T (r'_i(t) - r_i(t_{ref}))^2}$$

where  $T$  is the trajectory time over which the RMSF is calculated,  $t_{ref}$  is the reference time (usually for the first frame, and is regarded as the zero of time);  $r$  is the position of atom  $i$  in the reference at time  $t_{ref}$  and  $r'$  is the position of atom  $i$  at time  $t$  after superposition on the reference frame.

Ligand RMSF shows the ligand's fluctuations broken down by atom, corresponding to the 2D structure in the top panel. The ligand RMSF may give you insights on how ligand fragments interact with the protein and their entropic role in the binding event. In the bottom panel, the 'Fit Ligand on Protein' line shows the ligand fluctuations, with respect to the protein. The protein-ligand complex is first aligned on the protein backbone and then the ligand RMSF is measured on the ligand heavy atoms.

## Protein-Ligand Contacts

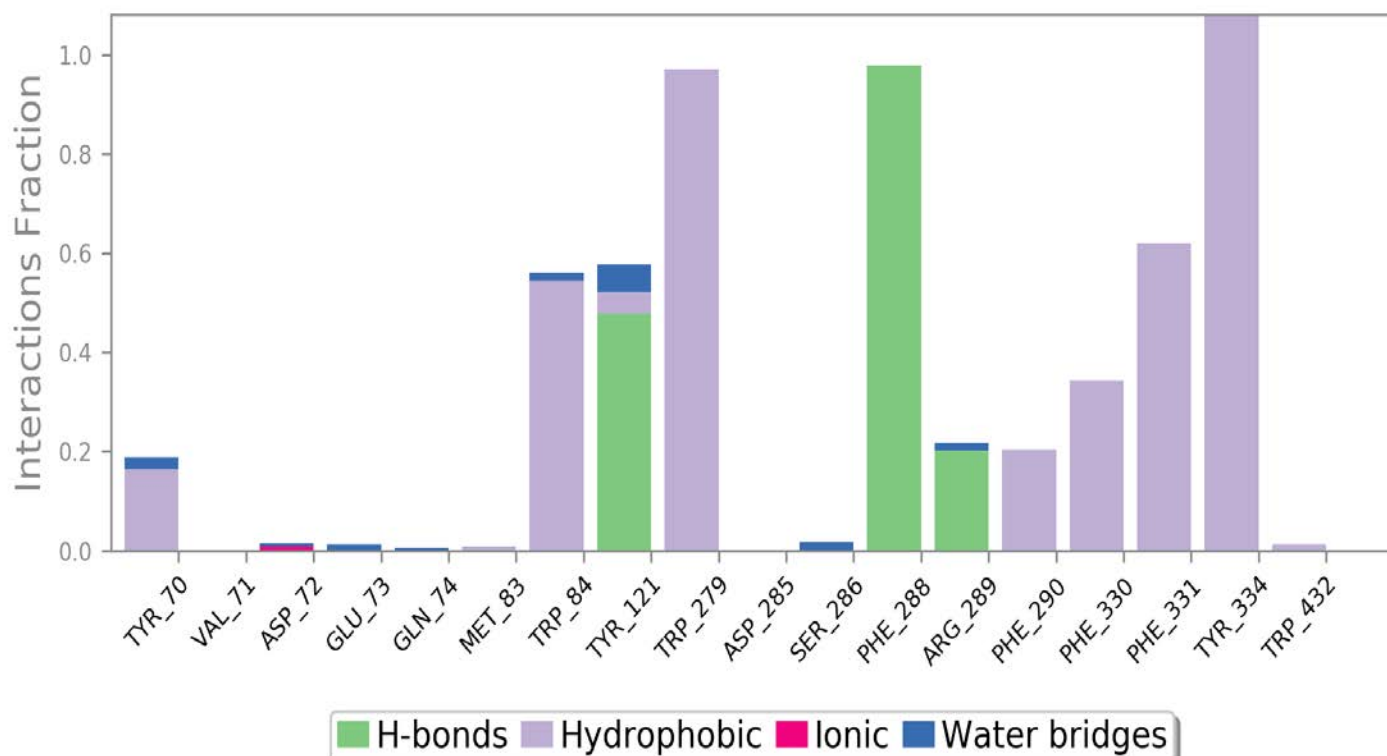

Protein interactions with the ligand can be monitored throughout the simulation. These interactions can be categorized by type and summarized, as shown in the plot above. Protein-ligand interactions (or 'contacts') are categorized into four types: Hydrogen Bonds, Hydrophobic, Ionic and Water Bridges. Each interaction type contains more specific subtypes, which can be explored through the 'Simulation Interactions Diagram' panel. The stacked bar charts are normalized over the course of the trajectory: for example, a value of 0.7 suggests that 70% of the simulation time the specific interaction is maintained. Values over 1.0 are possible as some protein residue may make multiple contacts of same subtype with the ligand.

**Hydrogen Bonds:** (H-bonds) play a significant role in ligand binding. Consideration of hydrogen-bonding properties in drug design is important because of their strong influence on drug specificity, metabolism and adsorption. Hydrogen bonds between a protein and a ligand can be further broken down into four subtypes: backbone acceptor; backbone donor; side-chain acceptor; side-chain donor.

The current geometric criteria for protein-ligand H-bond is: distance of 2.5 Å between the donor and acceptor atoms (D—H...A); a donor angle of  $\geq 120^\circ$  between the donor-hydrogen-acceptor atoms (D—H...A); and an acceptor angle of  $\geq 90^\circ$  between the hydrogen-acceptor-bonded\_atom atoms (H...A—X).

**Hydrophobic contacts:** fall into three subtypes:  $\pi$ -Cation;  $\pi$ - $\pi$ ; and Other, non-specific interactions. Generally these type of interactions involve a hydrophobic amino acid and an aromatic or aliphatic group on the ligand, but we have extended this category to also include  $\pi$ -Cation interactions.

The current geometric criteria for hydrophobic interactions is as follows:  $\pi$ -Cation — Aromatic and charged groups within 4.5 Å;  $\pi$ - $\pi$  — Two aromatic groups stacked face-to-face or face-to-edge; Other — A non-specific hydrophobic sidechain within 3.6 Å of a ligand's aromatic or aliphatic carbons.

**Ionic interactions:** or polar interactions, are between two oppositely charged atoms that are within 3.7 Å of each other and do not involve a hydrogen bond. We also monitor Protein-Metal-Ligand interactions, which are defined by a metal ion coordinated within 3.4 Å of protein's and ligand's heavy atoms (except carbon). All ionic interactions are broken down into two subtypes: those mediated by a protein backbone or side chains.

**Water Bridges:** are hydrogen-bonded protein-ligand interactions mediated by a water molecule. The hydrogen-bond geometry is slightly relaxed from the standard H-bond definition.

The current geometric criteria for a protein-water or water-ligand H-bond are: a distance of 2.8 Å between the donor and acceptor atoms (D—H...A); a donor angle of  $\geq 110^\circ$  between the donor-hydrogen-acceptor atoms (D—H...A); and an acceptor angle of  $\geq 90^\circ$  between the hydrogen-acceptor-bonded\_atom atoms (H...A—X).

## Protein-Ligand Contacts (cont.)

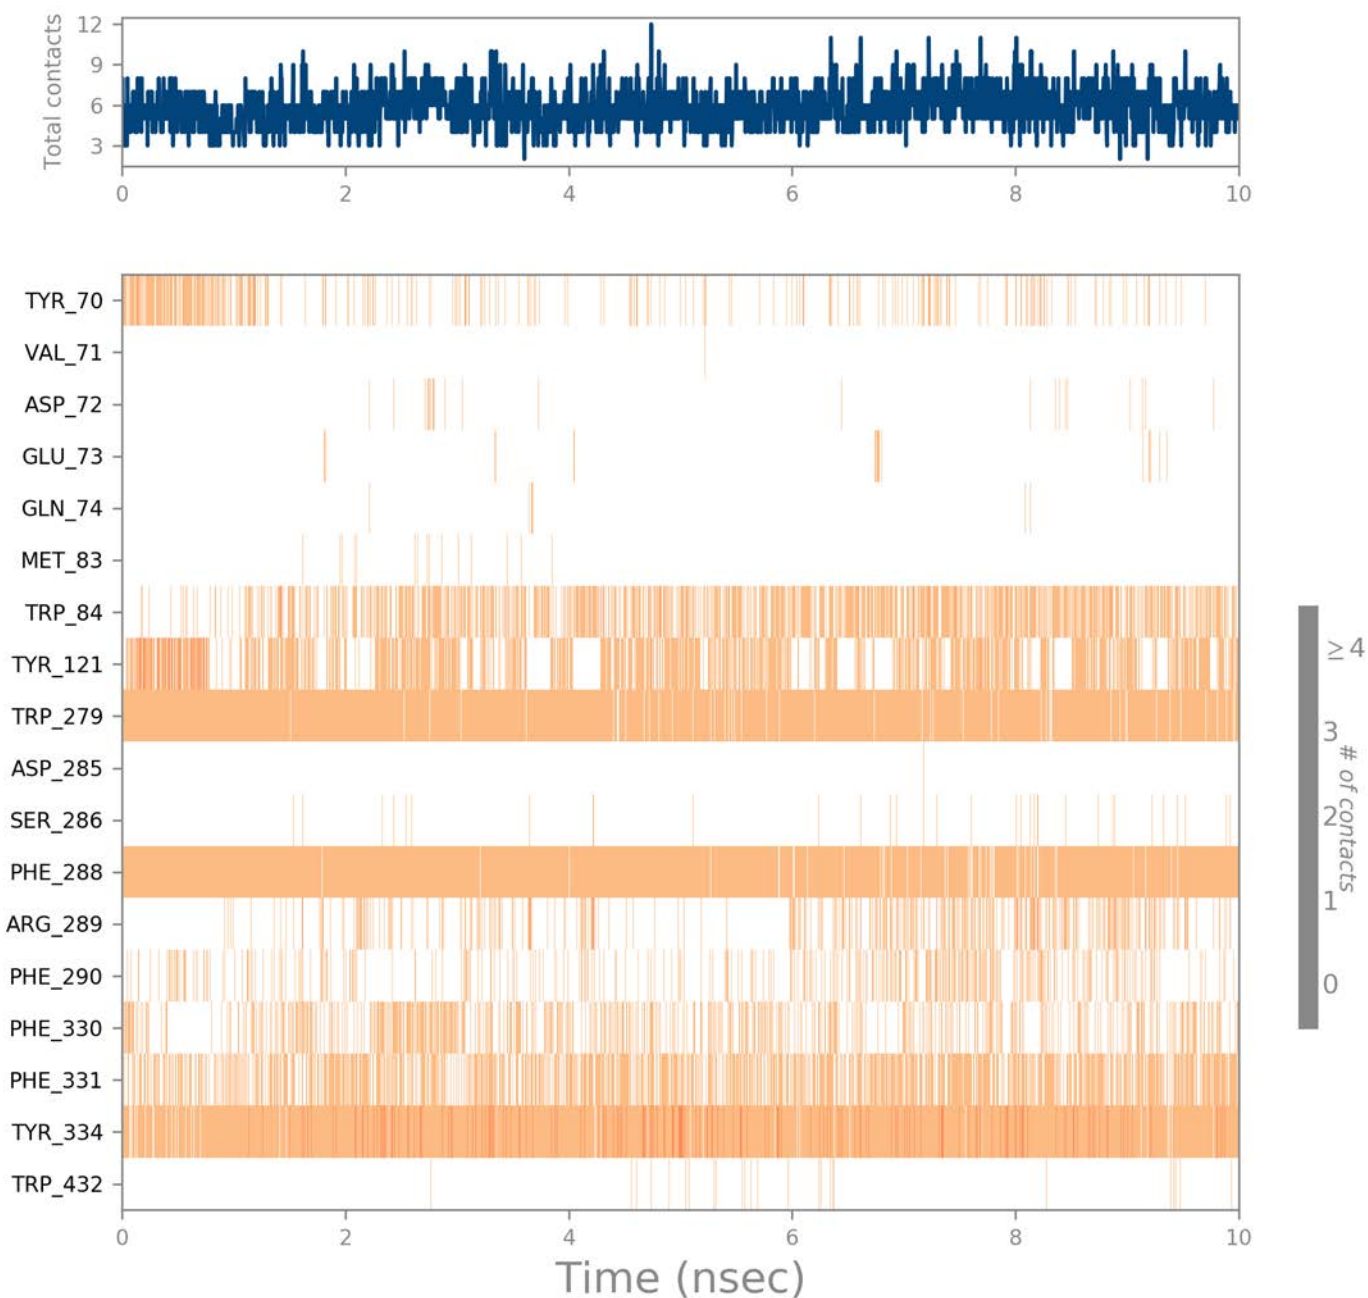

A timeline representation of the interactions and contacts (**H-bonds, Hydrophobic, Ionic, Water bridges**) summarized in the previous page. The top panel shows the total number of specific contacts the protein makes with the ligand over the course of the trajectory. The bottom panel shows which residues interact with the ligand in each trajectory frame. Some residues make more than one specific contact with the ligand, which is represented by a darker shade of orange, according to the scale to the right of the plot.

## Ligand-Protein Contacts

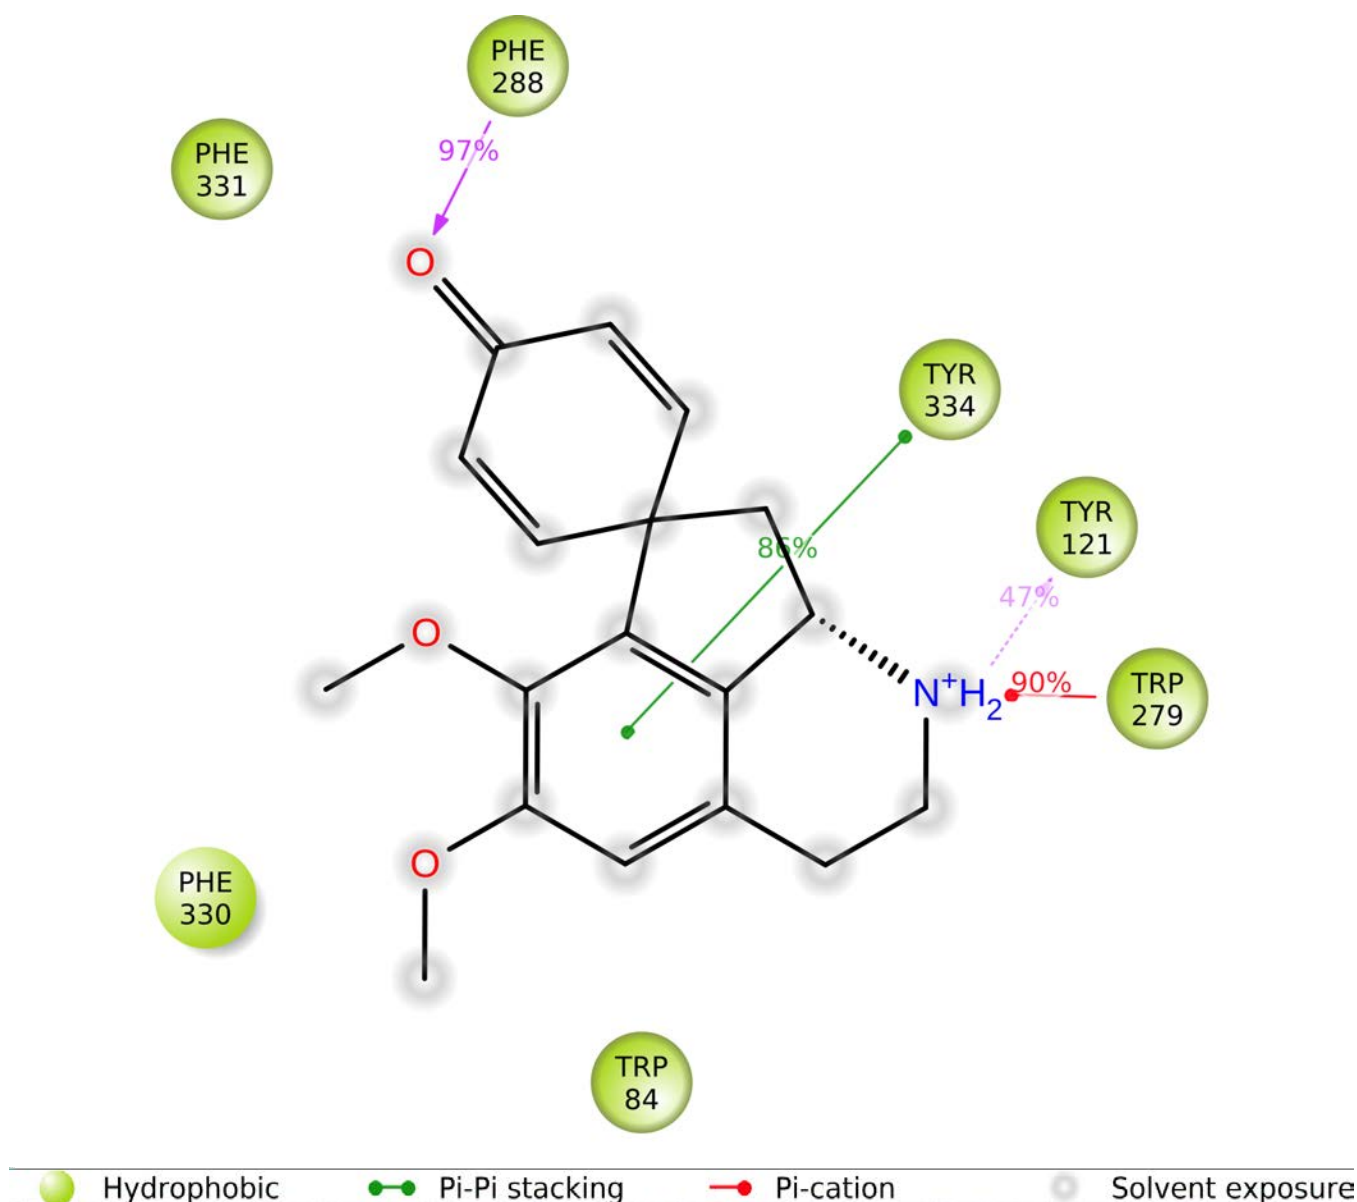

A schematic of detailed ligand atom interactions with the protein residues. Interactions that occur more than **30.0%** of the simulation time in the selected trajectory ( 0.00 through 10.00 nsec), are shown.

Note: it is possible to have interactions with >100% as some residues may have multiple interactions of a single type with the same ligand atom. For example, the ARG side chain has four H-bond donors that can all hydrogen-bond to a single H-bond acceptor.

## Ligand Torsion Profile

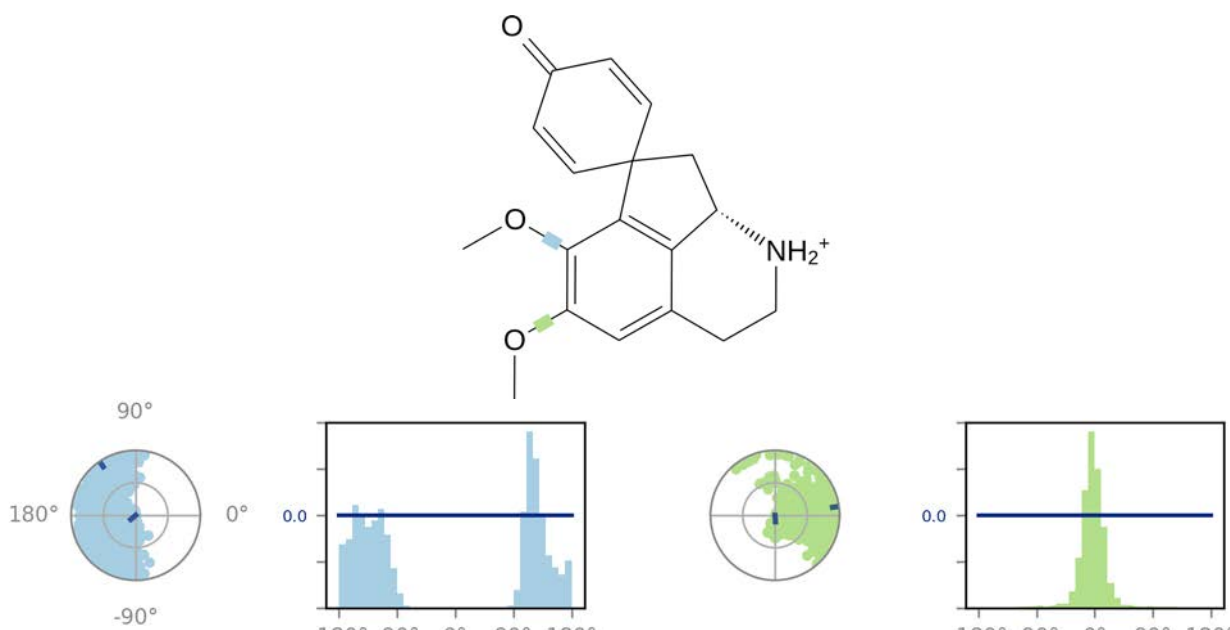

The ligand torsions plot summarizes the conformational evolution of every rotatable bond (RB) in the ligand throughout the simulation trajectory ( 0.00 through 10.00 nsec). The top panel shows the 2d schematic of a ligand with color-coded rotatable bonds. Each rotatable bond torsion is accompanied by a dial plot and bar plots of the same color.

Dial (or radial) plots describe the conformation of the torsion throughout the course of the simulation. The beginning of the simulation is in the center of the radial plot and the time evolution is plotted radially outwards.

The bar plots summarize the data on the dial plots, by showing the probability density of the torsion. If torsional potential information is available, the plot also shows the potential of the rotatable bond (by summing the potential of the related torsions). The values of the potential are on the left Y-axis of the chart, and are expressed in *kcal/mol*. Looking at the histogram and torsion potential relationships may give insights into the conformational strain the ligand undergoes to maintain a protein-bound conformation.

## Ligand Properties

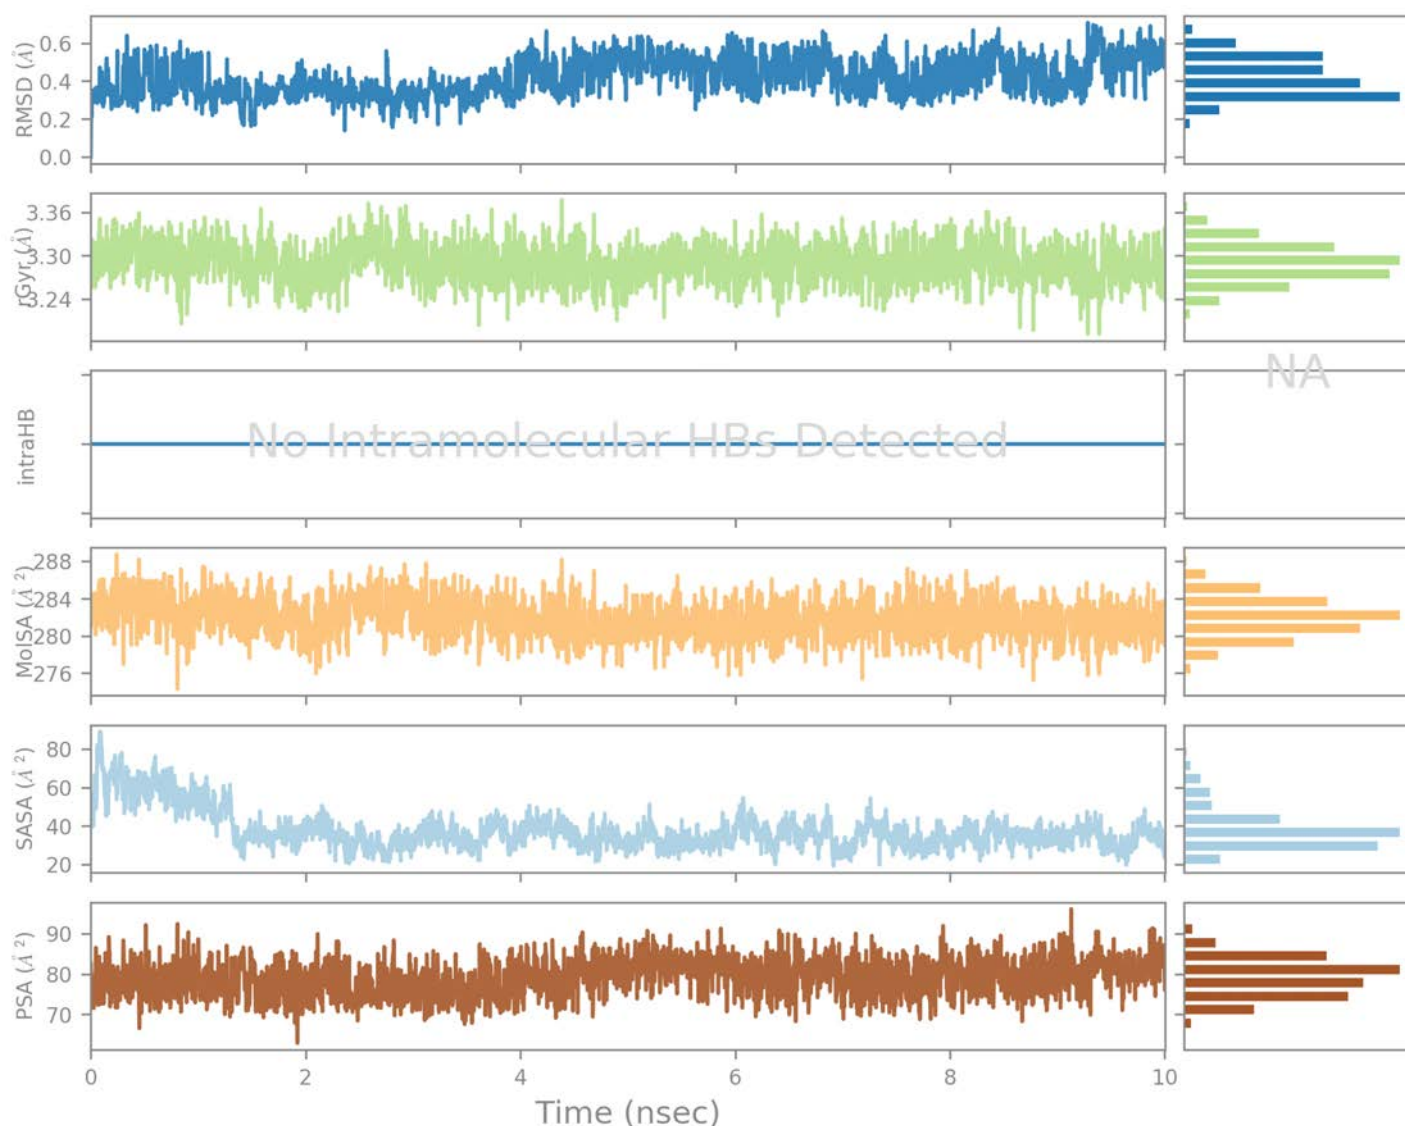

**Ligand RMSD:** Root mean square deviation of a ligand with respect to the reference conformation (typically the first frame is used as the reference and it is regarded as time  $t=0$ ).

**Radius of Gyration (rGyr):** Measures the 'extendedness' of a ligand, and is equivalent to its principal moment of inertia.

**Intramolecular Hydrogen Bonds (intraHB):** Number of internal hydrogen bonds (HB) within a ligand molecule.

**Molecular Surface Area (MolSA):** Molecular surface calculation with 1.4 Å probe radius. This value is equivalent to a van der Waals surface area.

**Solvent Accessible Surface Area (SASA):** Surface area of a molecule accessible by a water molecule.

**Polar Surface Area (PSA):** Solvent accessible surface area in a molecule contributed only by oxygen and nitrogen atoms.



## Report S4

# MD Simulation Report on AChE - Palmatine Interactions

### Simulation Details

Jobname: md\_job\_6H12\_3-dock-2  
Entry title: 3-dock-2

| CPU # | Job Type | Ensemble | Temp. [K] | Sim. Time [ns] | # Atoms | # Waters | Charge |
|-------|----------|----------|-----------|----------------|---------|----------|--------|
| 1     | mdsim    | NPT      | 300.0     | 10.005         | 62805   | 17950    | 0      |

### Protein Information

| Tot. Residues | Prot. Chain(s) | Res. in Chain(s)  | # Atoms | # Heavy Atoms | Charge |
|---------------|----------------|-------------------|---------|---------------|--------|
| 562           | 'NoChainId'    | ict_values([562]) | 8798    | 4471          | -10    |

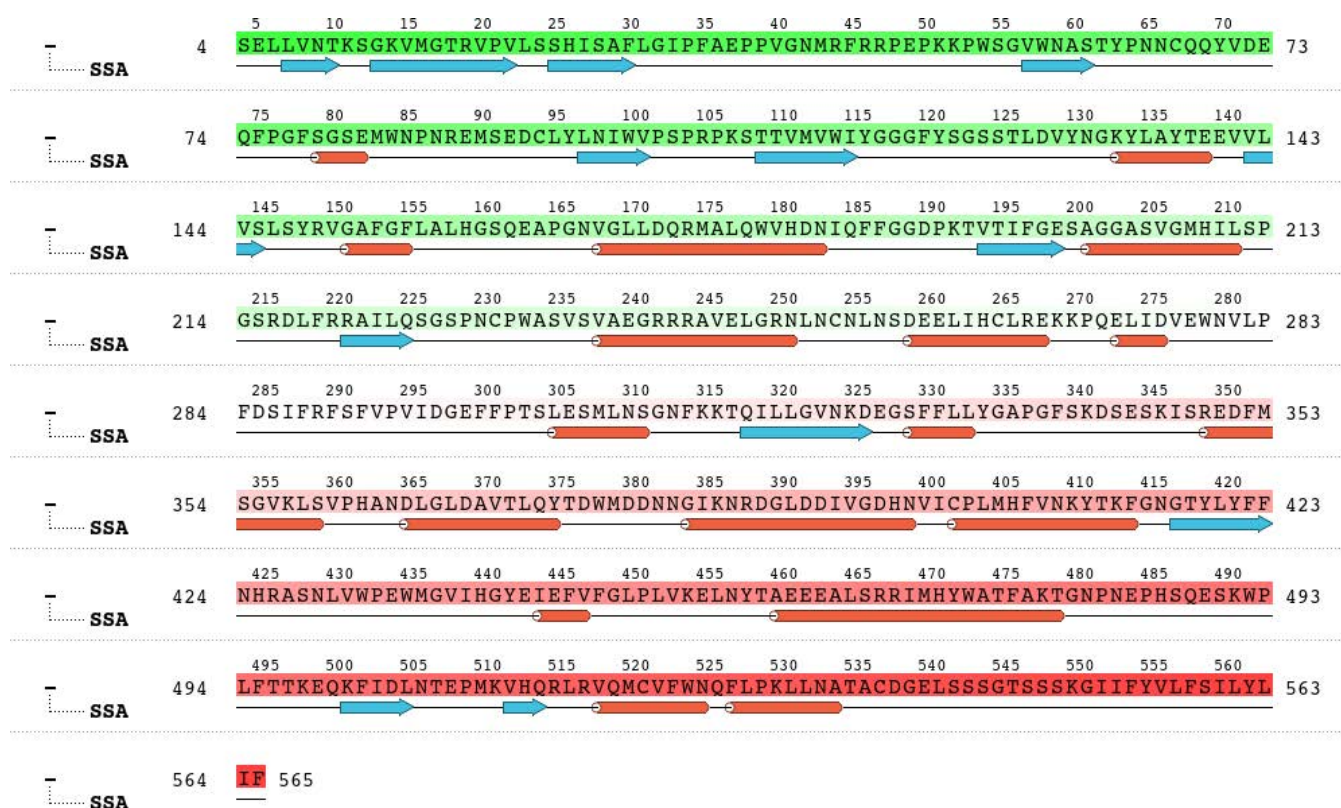

### Ligand Information

|                    |                                                 |
|--------------------|-------------------------------------------------|
| SMILES             | COc1c(OC)ccc(c12)cc3c4c(CC[n+](c2)cc(OC)c(c4)OC |
| PDB Name           | 'UNK'                                           |
| Num. of Atoms      | 48 (total) 26 (heavy)                           |
| Atomic Mass        | 352.414 au                                      |
| Charge             | +1                                              |
| Mol. Formula       | C21H22NO4                                       |
| Num. of Fragments  | 1                                               |
| Num. of Rot. Bonds | 4                                               |

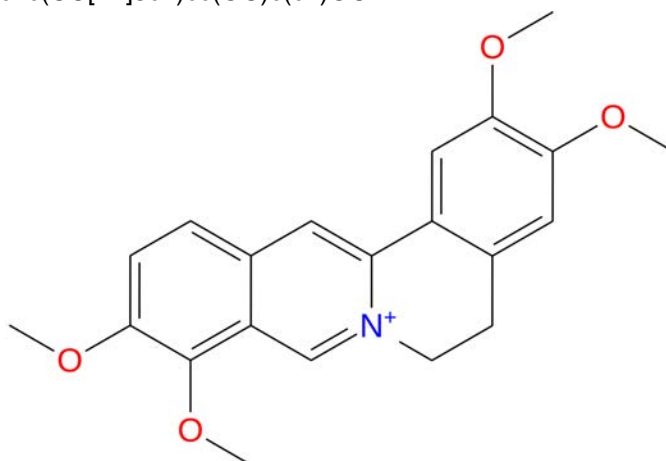

### Counter Ion/Salt Information

| Type | Num. | Concentration [mM] | Total Charge |
|------|------|--------------------|--------------|
| Na   | 59   | 59.762             | +59          |
| Cl   | 50   | 50.646             | -50          |



## Protein-Ligand RMSD

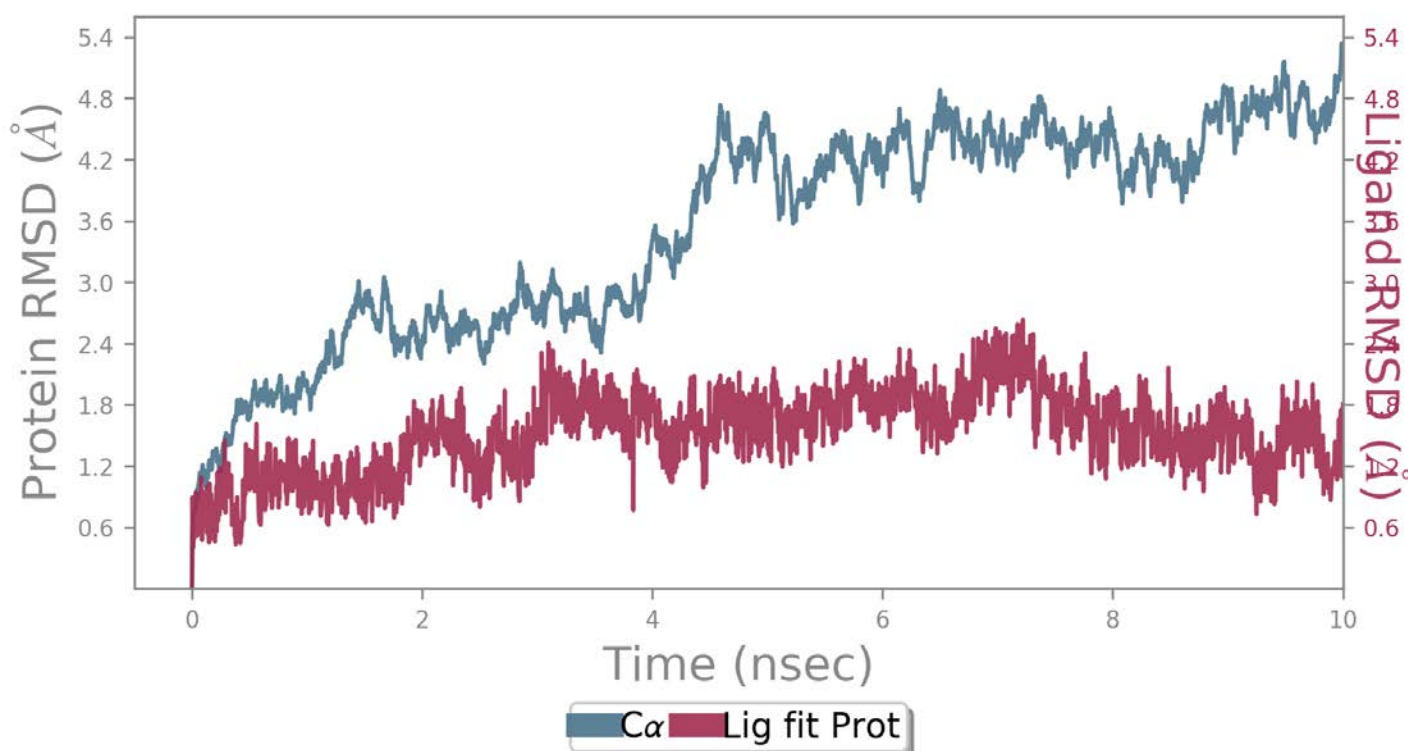

The Root Mean Square Deviation (RMSD) is used to measure the average change in displacement of a selection of atoms for a particular frame with respect to a reference frame. It is calculated for all frames in the trajectory. The RMSD for frame  $x$  is:

$$RMSD_x = \sqrt{\frac{1}{N} \sum_{i=1}^N (r'_i(t_x) - r_i(t_{ref}))^2}$$

where  $N$  is the number of atoms in the atom selection;  $t_{ref}$  is the reference time, (typically the first frame is used as the reference and it is regarded as time  $t=0$ ); and  $r'$  is the position of the selected atoms in frame  $x$  after superimposing on the reference frame, where frame  $x$  is recorded at time  $t_x$ . The procedure is repeated for every frame in the simulation trajectory.

**Protein RMSD:** The above plot shows the RMSD evolution of a protein (left Y-axis). All protein frames are first aligned on the reference frame backbone, and then the RMSD is calculated based on the atom selection. Monitoring the RMSD of the protein can give insights into its structural conformation throughout the simulation. RMSD analysis can indicate if the simulation has equilibrated — its fluctuations towards the end of the simulation are around some thermal average structure. Changes of the order of 1-3 Å are perfectly acceptable for small, globular proteins. Changes much larger than that, however, indicate that the protein is undergoing a large conformational change during the simulation. It is also important that your simulation converges — the RMSD values stabilize around a fixed value. If the RMSD of the protein is still increasing or decreasing on average at the end of the simulation, then your system has not equilibrated, and your simulation may not be long enough for rigorous analysis.

**Ligand RMSD:** Ligand RMSD (right Y-axis) indicates how stable the ligand is with respect to the protein and its binding pocket. In the above plot, 'Lig fit Prot' shows the RMSD of a ligand when the protein-ligand complex is first aligned on the protein backbone of the reference and then the RMSD of the ligand heavy atoms is measured. If the values observed are significantly larger than the RMSD of the protein, then it is likely that the ligand has diffused away from its initial binding site.

## Protein RMSF

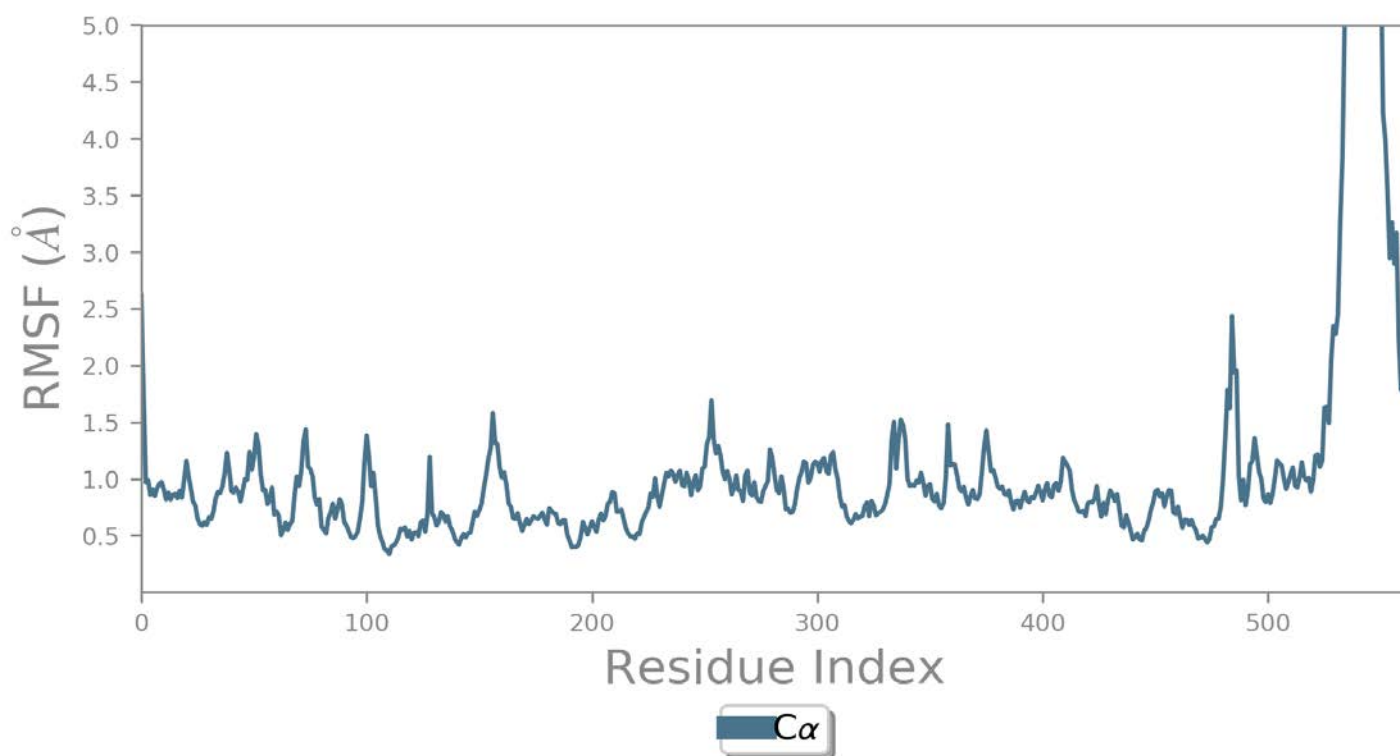

The Root Mean Square Fluctuation (RMSF) is useful for characterizing local changes along the protein chain. The RMSF for residue  $i$  is:

$$RMSF_i = \sqrt{\frac{1}{T} \sum_{t=1}^T \langle (r'_i(t)) - r_i(t_{ref})^2 \rangle}$$

where  $T$  is the trajectory time over which the RMSF is calculated,  $t_{ref}$  is the reference time,  $r_i$  is the position of residue  $i$ ;  $r'$  is the position of atoms in residue  $i$  after superposition on the reference, and the angle brackets indicate that the average of the square distance is taken over the selection of atoms in the residue.

On this plot, peaks indicate areas of the protein that fluctuate the most during the simulation. Typically you will observe that the tails ( $N$ - and  $C$ -terminal) fluctuate more than any other part of the protein. Secondary structure elements like alpha helices and beta strands are usually more rigid than the unstructured part of the protein, and thus fluctuate less than the loop regions.

## Protein Secondary Structure

% Helix  
29.83

% Strand  
12.65

% Total SSE  
42.48

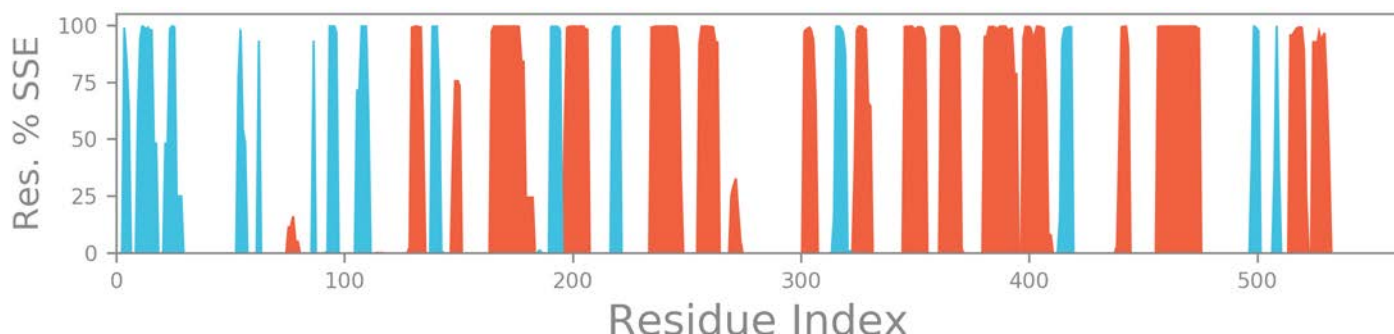

Protein secondary structure elements (SSE) like **alpha-helices** and **beta-strands** are monitored throughout the simulation. The plot above reports SSE distribution by residue index throughout the protein structure. The plot below summarizes the SSE composition for each trajectory frame over the course of the simulation, and the plot at the bottom monitors each residue and its SSE assignment over time.

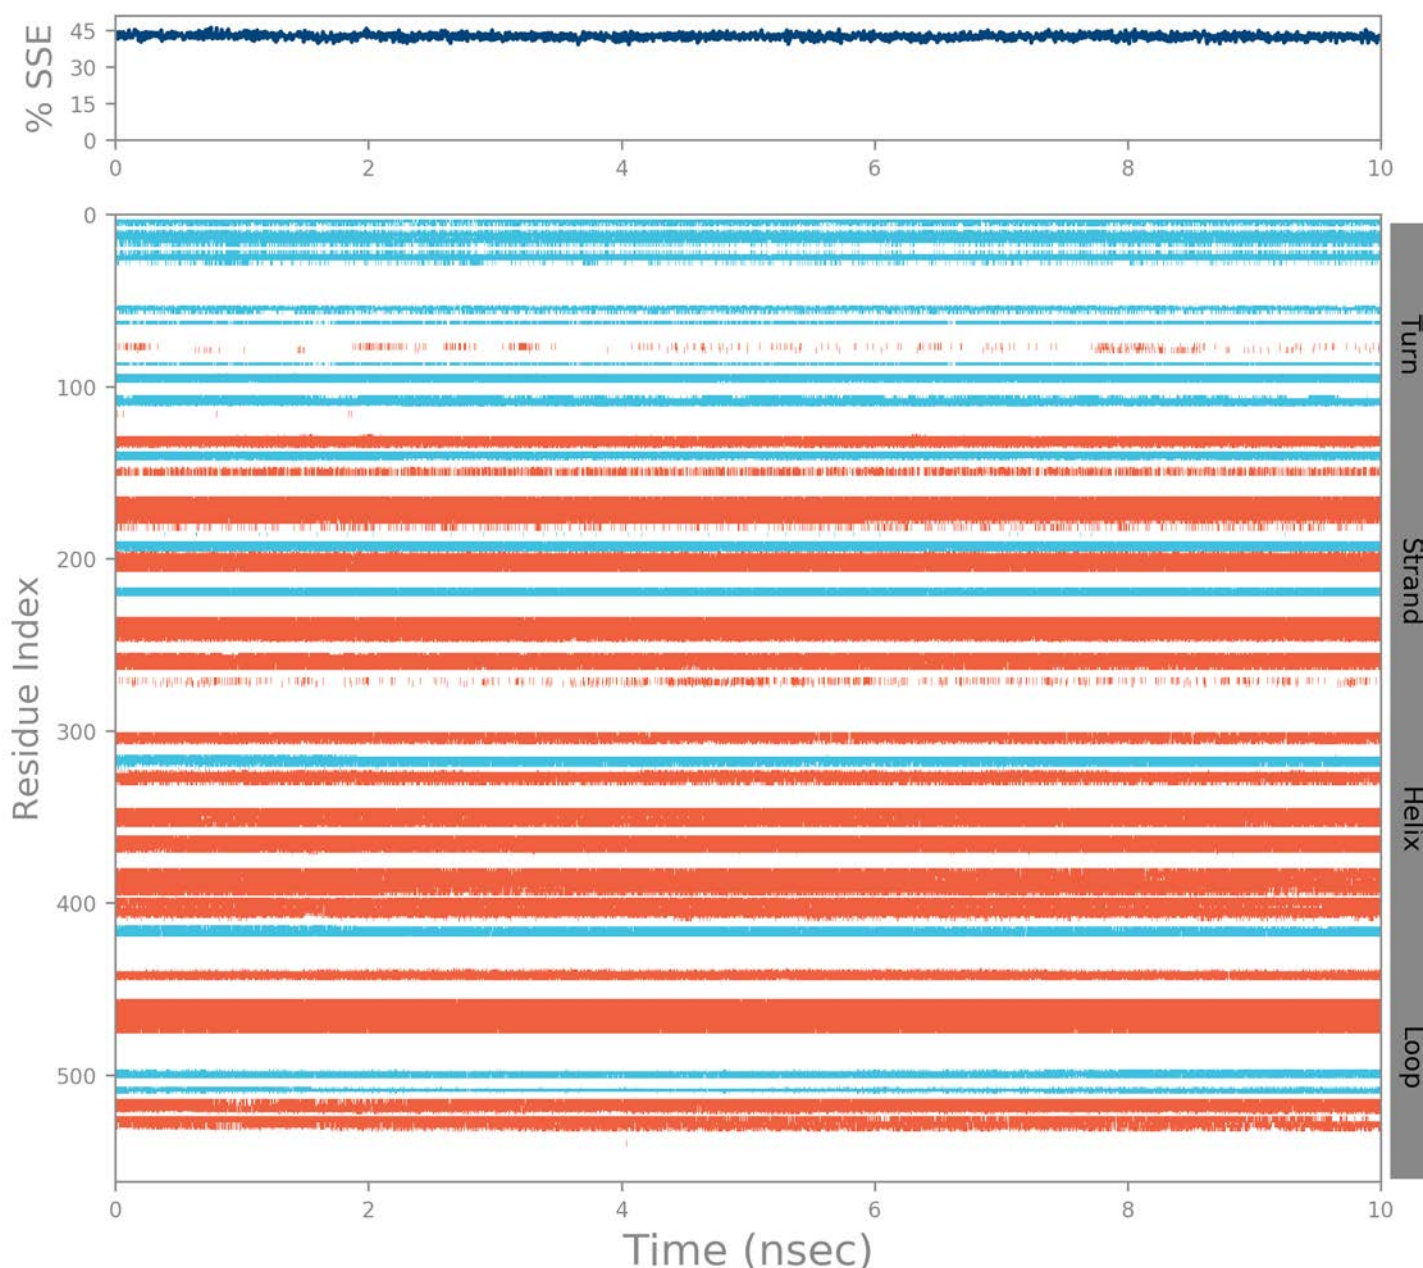

## Palmatine Ligand RMSF

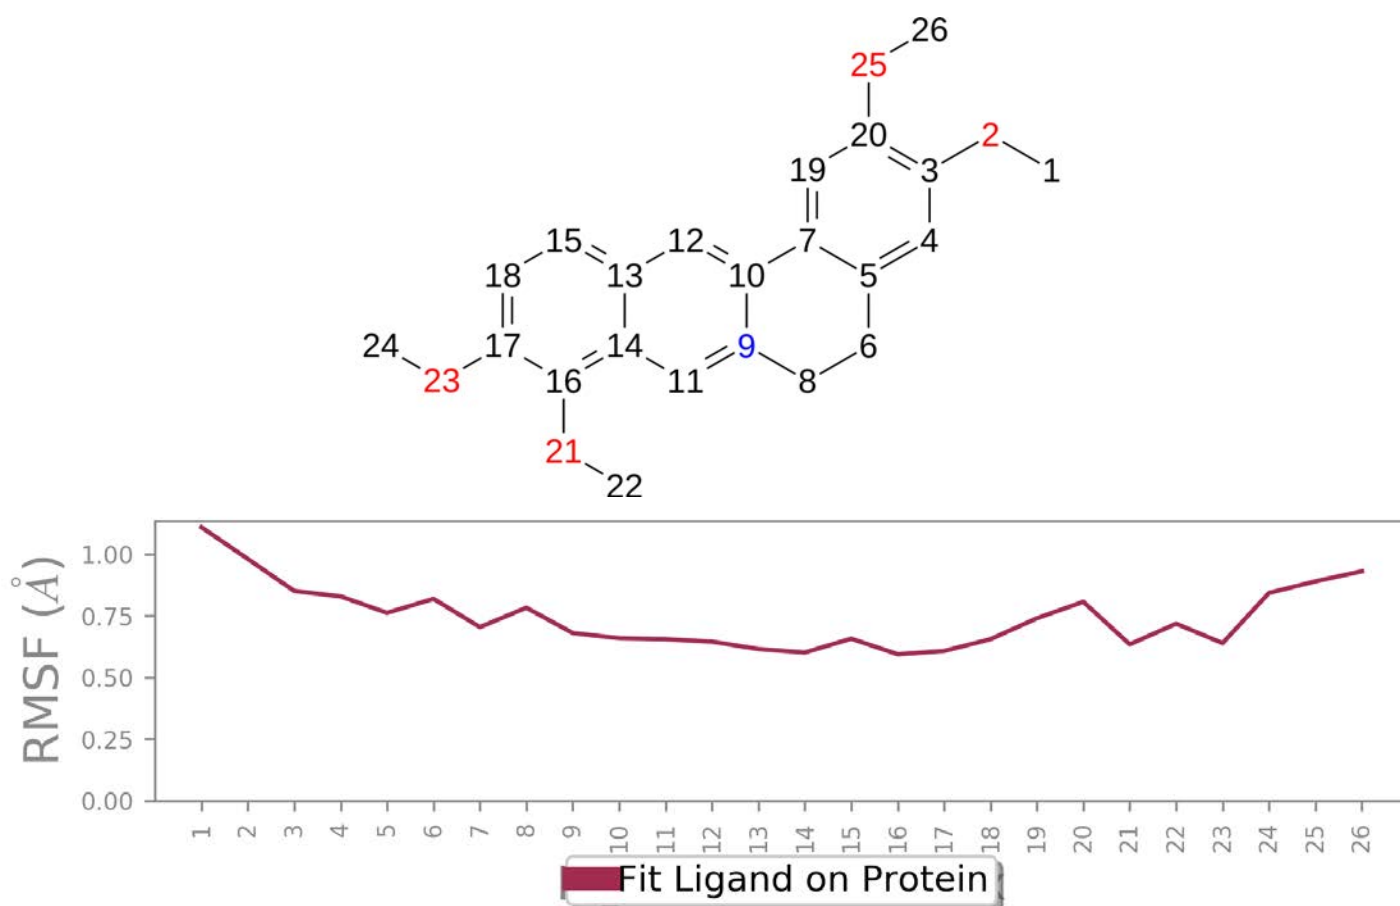

The Ligand Root Mean Square Fluctuation (L-RMSF) is useful for characterizing changes in the ligand atom positions. The RMSF for atom  $i$  is:

$$RMSF_i = \sqrt{\frac{1}{T} \sum_{t=1}^T (r'_i(t) - r_i(t_{ref}))^2}$$

where  $T$  is the trajectory time over which the RMSF is calculated,  $t_{ref}$  is the reference time (usually for the first frame, and is regarded as the zero of time);  $r$  is the position of atom  $i$  in the reference at time  $t_{ref}$  and  $r'$  is the position of atom  $i$  at time  $t$  after superposition on the reference frame.

Ligand RMSF shows the ligand's fluctuations broken down by atom, corresponding to the 2D structure in the top panel. The ligand RMSF may give you insights on how ligand fragments interact with the protein and their entropic role in the binding event. In the bottom panel, the 'Fit Ligand on Protein' line shows the ligand fluctuations, with respect to the protein. The protein-ligand complex is first aligned on the protein backbone and then the ligand RMSF is measured on the ligand heavy atoms.



## Protein-Ligand Contacts

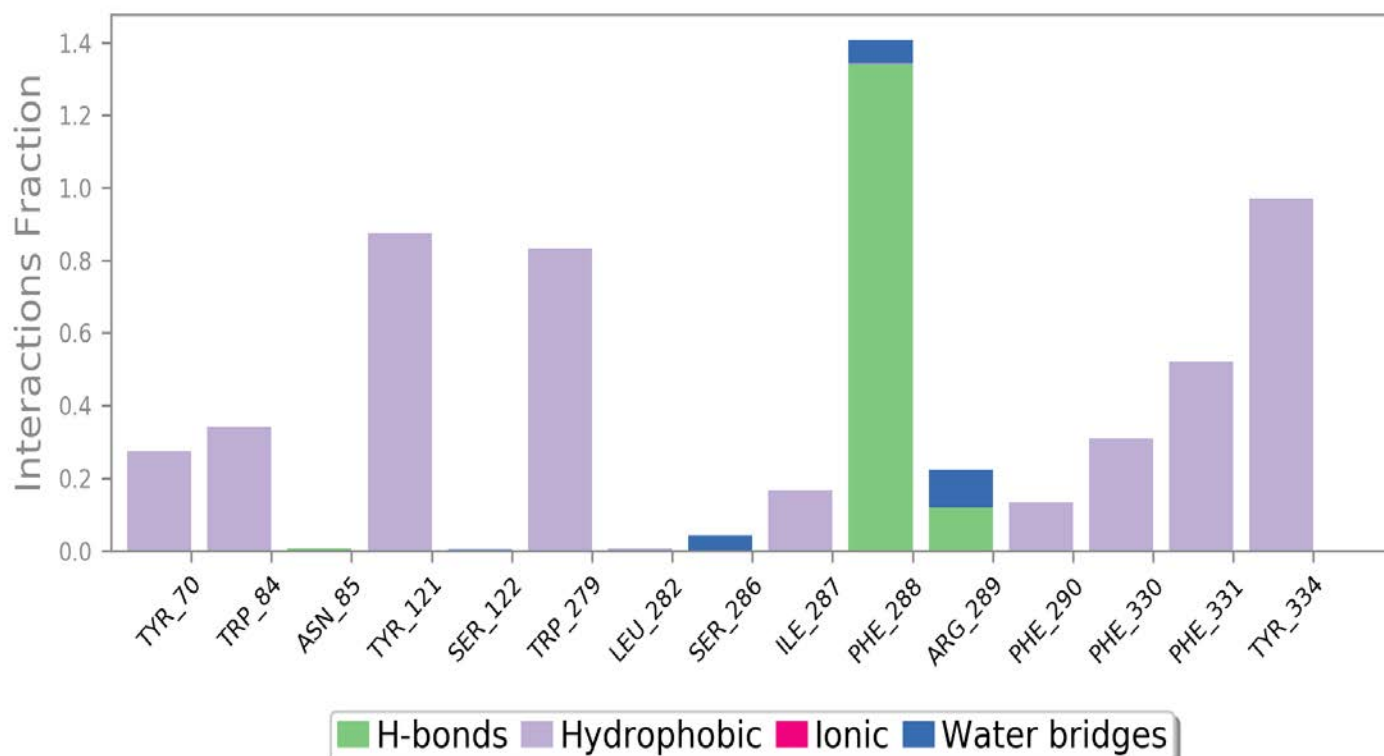

Protein interactions with the ligand can be monitored throughout the simulation. These interactions can be categorized by type and summarized, as shown in the plot above. Protein-ligand interactions (or 'contacts') are categorized into four types: Hydrogen Bonds, Hydrophobic, Ionic and Water Bridges. Each interaction type contains more specific subtypes, which can be explored through the 'Simulation Interactions Diagram' panel. The stacked bar charts are normalized over the course of the trajectory: for example, a value of 0.7 suggests that 70% of the simulation time the specific interaction is maintained. Values over 1.0 are possible as some protein residue may make multiple contacts of same subtype with the ligand.

**Hydrogen Bonds:** (H-bonds) play a significant role in ligand binding. Consideration of hydrogen-bonding properties in drug design is important because of their strong influence on drug specificity, metabolism and adsorption. Hydrogen bonds between a protein and a ligand can be further broken down into four subtypes: backbone acceptor; backbone donor; side-chain acceptor; side-chain donor.

The current geometric criteria for protein-ligand H-bond is: distance of 2.5 Å between the donor and acceptor atoms (D—H...A); a donor angle of  $\geq 120^\circ$  between the donor-hydrogen-acceptor atoms (D—H...A); and an acceptor angle of  $\geq 90^\circ$  between the hydrogen-acceptor-bonded\_atom atoms (H...A—X).

**Hydrophobic contacts:** fall into three subtypes:  $\pi$ -Cation;  $\pi$ - $\pi$ ; and Other, non-specific interactions. Generally these type of interactions involve a hydrophobic amino acid and an aromatic or aliphatic group on the ligand, but we have extended this category to also include  $\pi$ -Cation interactions.

The current geometric criteria for hydrophobic interactions is as follows:  $\pi$ -Cation — Aromatic and charged groups within 4.5 Å;  $\pi$ - $\pi$  — Two aromatic groups stacked face-to-face or face-to-edge; Other — A non-specific hydrophobic sidechain within 3.6 Å of a ligand's aromatic or aliphatic carbons.

**Ionic interactions:** or polar interactions, are between two oppositely charged atoms that are within 3.7 Å of each other and do not involve a hydrogen bond. We also monitor Protein-Metal-Ligand interactions, which are defined by a metal ion coordinated within 3.4 Å of protein's and ligand's heavy atoms (except carbon). All ionic interactions are broken down into two subtypes: those mediated by a protein backbone or side chains.

**Water Bridges:** are hydrogen-bonded protein-ligand interactions mediated by a water molecule. The hydrogen-bond geometry is slightly relaxed from the standard H-bond definition.

The current geometric criteria for a protein-water or water-ligand H-bond are: a distance of 2.8 Å between the donor and acceptor atoms (D—H...A); a donor angle of  $\geq 110^\circ$  between the donor-hydrogen-acceptor atoms (D—H...A); and an acceptor angle of  $\geq 90^\circ$  between the hydrogen-acceptor-bonded\_atom atoms (H...A—X).

## Protein-Ligand Contacts (cont.)

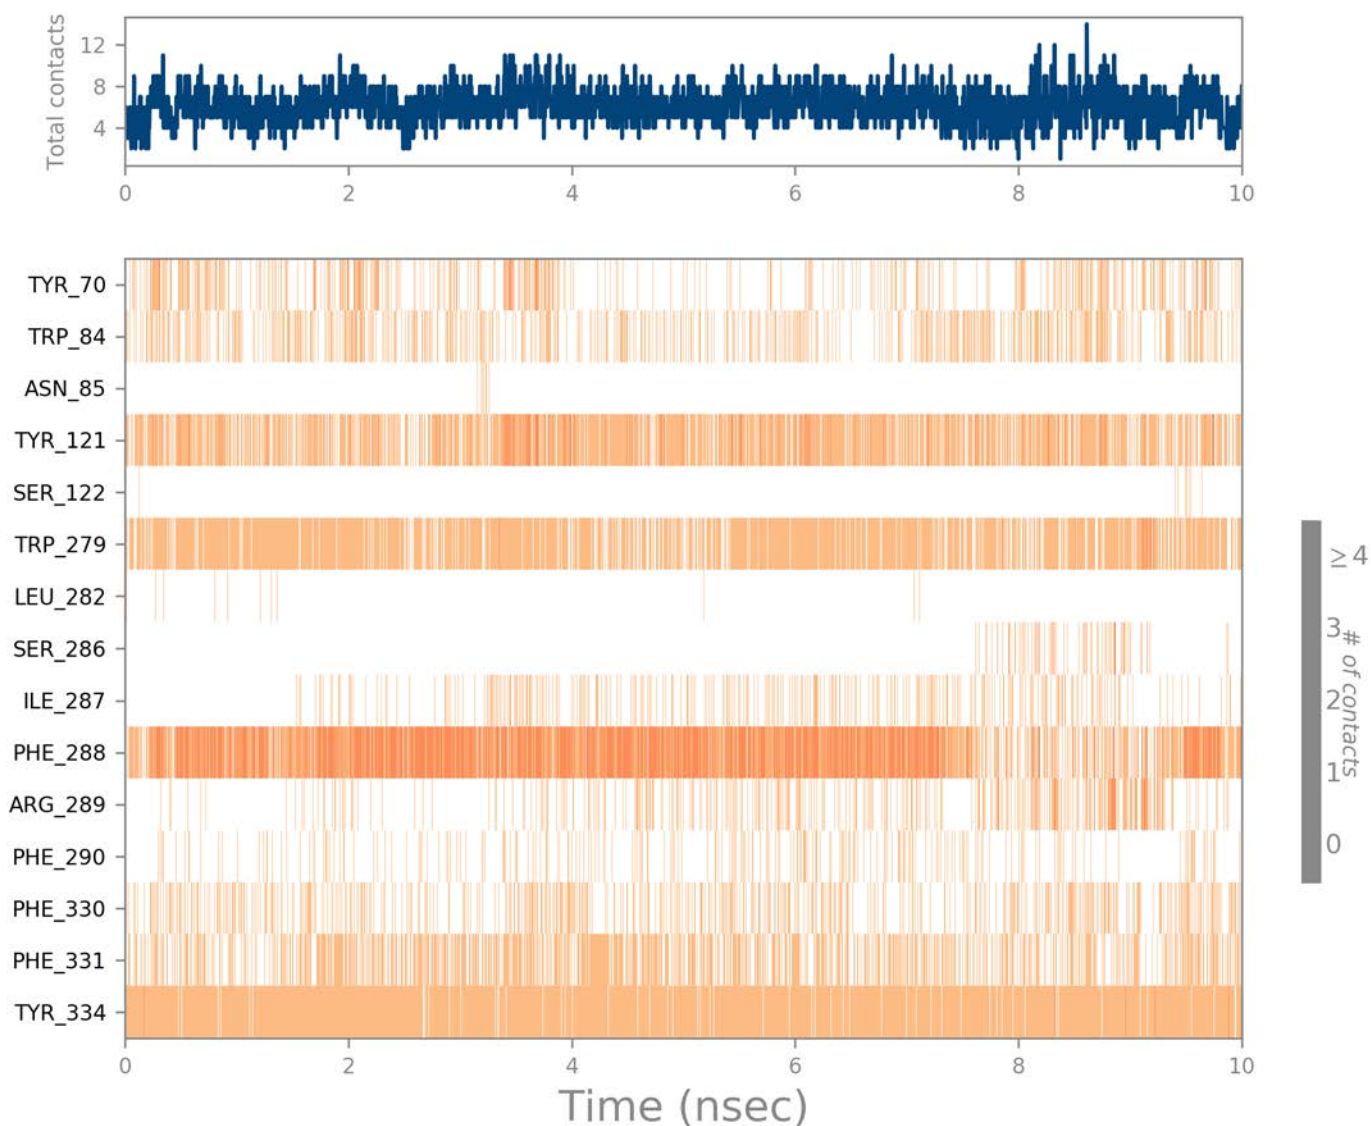

A timeline representation of the interactions and contacts (**H-bonds, Hydrophobic, Ionic, Water bridges**) summarized in the previous page. The top panel shows the total number of specific contacts the protein makes with the ligand over the course of the trajectory. The bottom panel shows which residues interact with the ligand in each trajectory frame. Some residues make more than one specific contact with the ligand, which is represented by a darker shade of orange, according to the scale to the right of the plot.

## Ligand-Protein Contacts

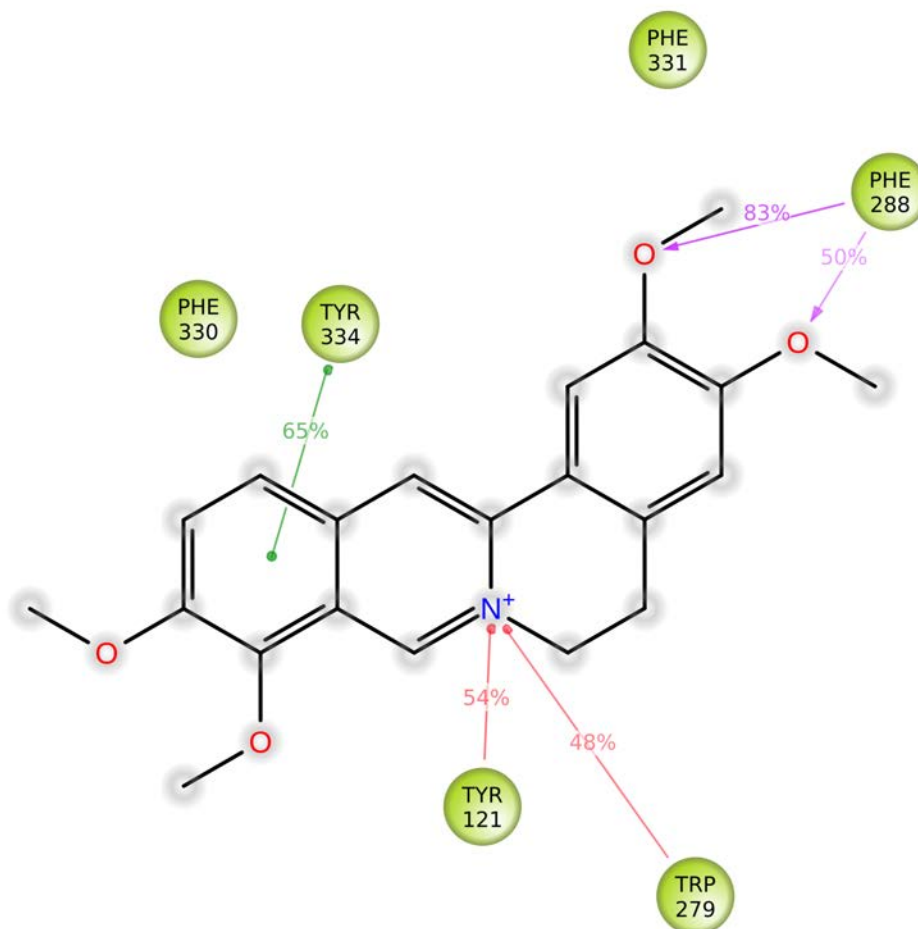

● Hydrophobic    
 —●—●— Pi-Pi stacking    
 —●— Pi-cation    
 ○ Solvent exposure

A schematic of detailed ligand atom interactions with the protein residues. Interactions that occur more than **30.0%** of the simulation time in the selected trajectory ( 0.00 through 10.00 nsec), are shown.

Note: it is possible to have interactions with >100% as some residues may have multiple interactions of a single type with the same ligand atom. For example, the ARG side chain has four H-bond donors that can all hydrogen-bond to a single H-bond acceptor.

## Ligand Torsion Profile

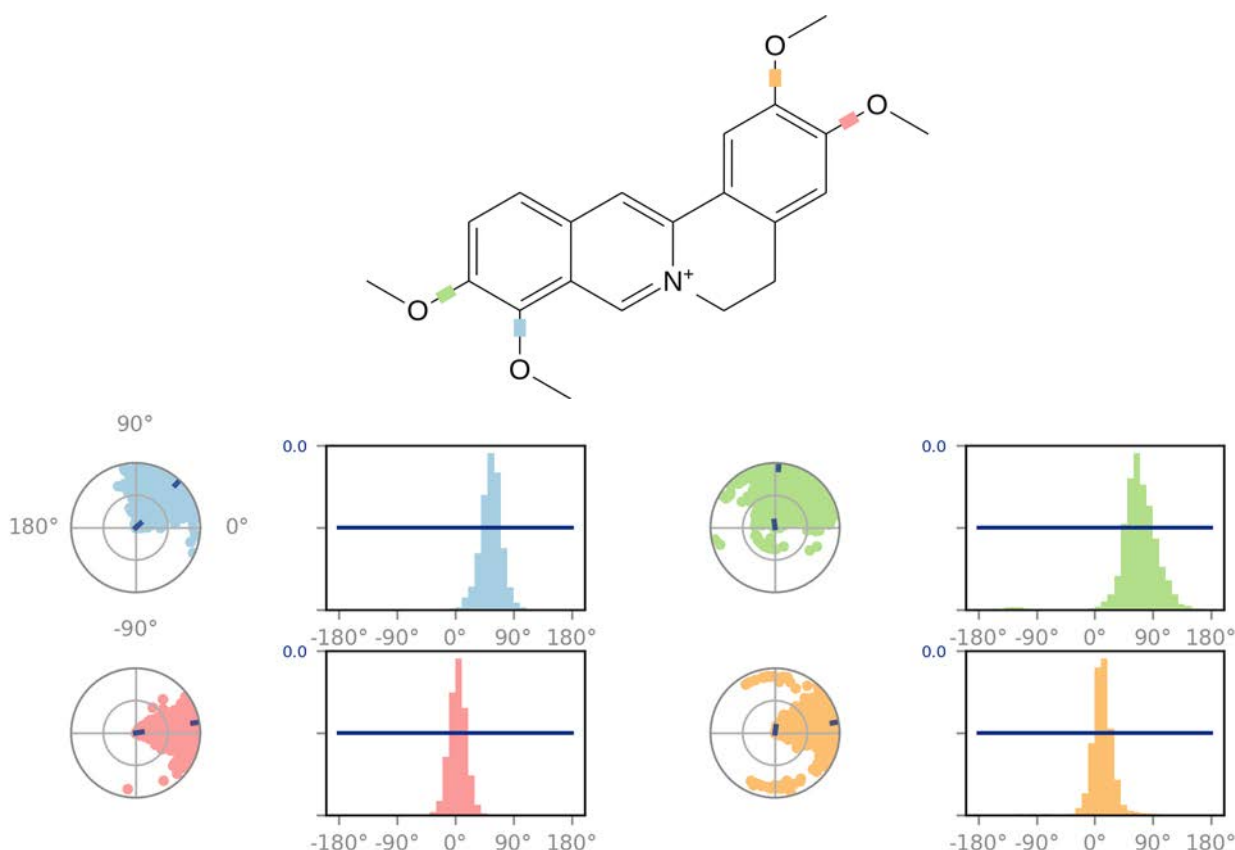

The ligand torsions plot summarizes the conformational evolution of every rotatable bond (RB) in the ligand throughout the simulation trajectory ( 0.00 through 10.00 nsec). The top panel shows the 2d schematic of a ligand with color-coded rotatable bonds. Each rotatable bond torsion is accompanied by a dial plot and bar plots of the same color.

Dial (or radial) plots describe the conformation of the torsion throughout the course of the simulation. The beginning of the simulation is in the center of the radial plot and the time evolution is plotted radially outwards.

The bar plots summarize the data on the dial plots, by showing the probability density of the torsion. If torsional potential information is available, the plot also shows the potential of the rotatable bond (by summing the potential of the related torsions). The values of the potential are on the left Y-axis of the chart, and are expressed in *kcal/mol*. Looking at the histogram and torsion potential relationships may give insights into the conformational strain the ligand undergoes to maintain a protein-bound conformation.



## Ligand Properties

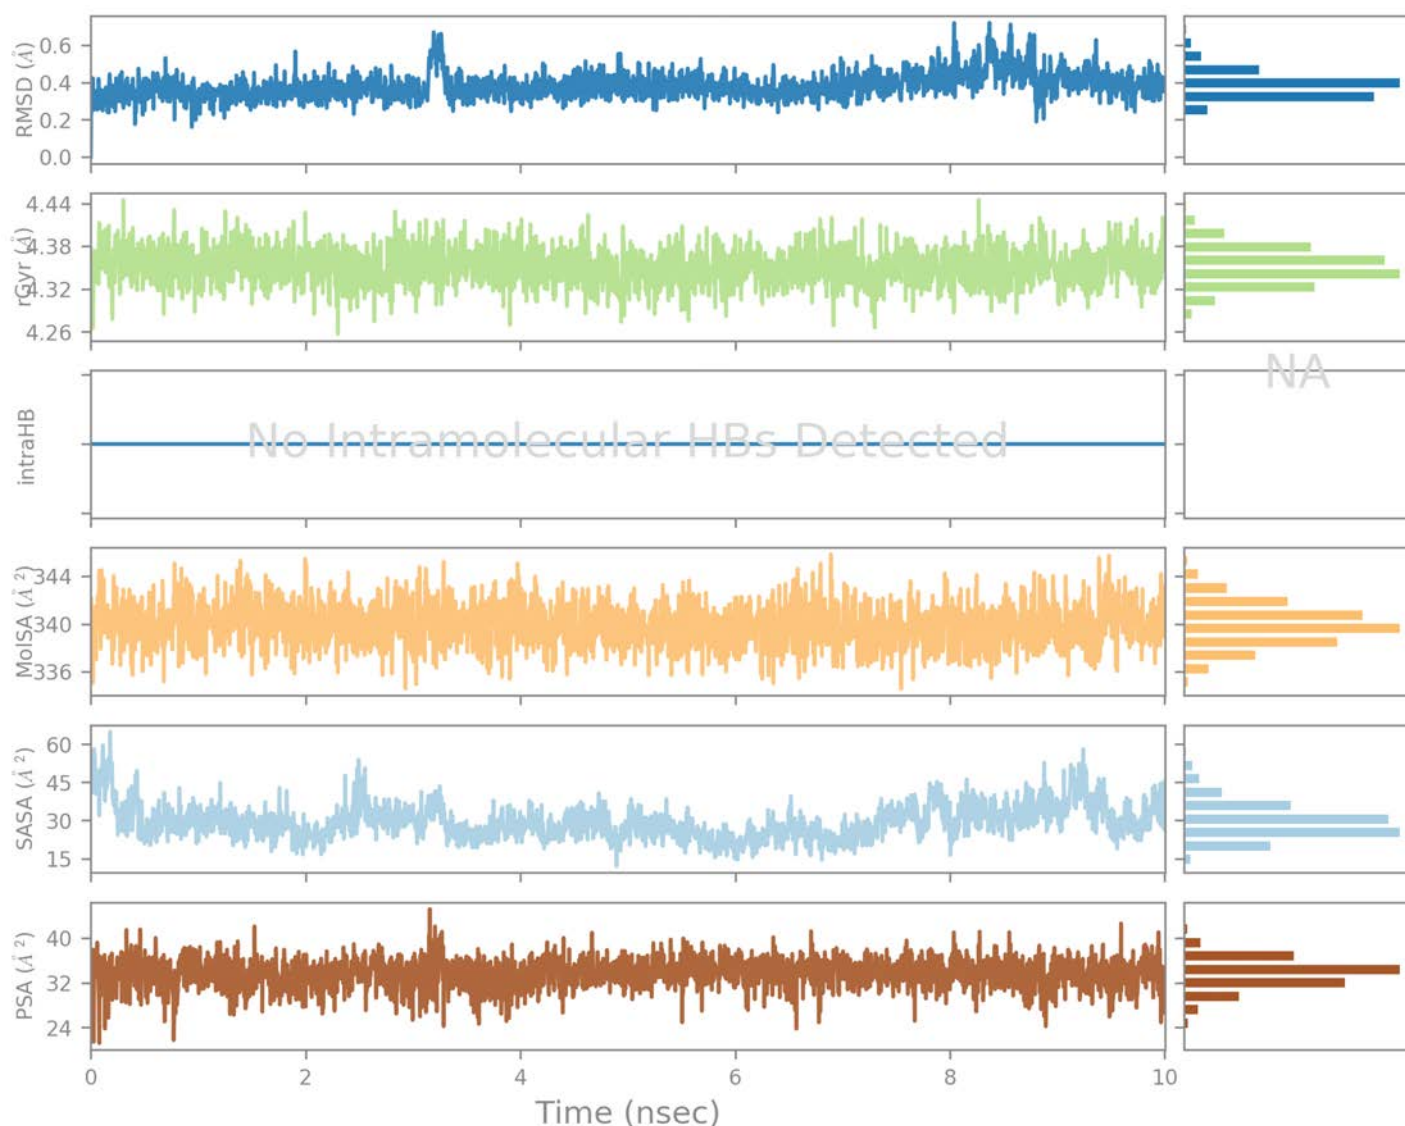

**Ligand RMSD:** Root mean square deviation of a ligand with respect to the reference conformation (typically the first frame is used as the reference and it is regarded as time  $t=0$ ).

**Radius of Gyration (rGyr):** Measures the 'extendedness' of a ligand, and is equivalent to its principal moment of inertia.

**Intramolecular Hydrogen Bonds (intraHB):** Number of internal hydrogen bonds (HB) within a ligand molecule.

**Molecular Surface Area (MolSA):** Molecular surface calculation with 1.4 Å probe radius. This value is equivalent to a van der Waals surface area.

**Solvent Accessible Surface Area (SASA):** Surface area of a molecule accessible by a water molecule.

**Polar Surface Area (PSA):** Solvent accessible surface area in a molecule contributed only by oxygen and nitrogen atoms.

## Report S5

# MD Simulation Report on AChE - 5-N-Methylmaytenine Interactions

### Simulation Details

Jobname: md\_job\_6H12\_4-dock-1  
Entry title: 4-dock-1

| CPU # | Job Type | Ensemble | Temp. [K] | Sim. Time [ns] | # Atoms | # Waters | Charge |
|-------|----------|----------|-----------|----------------|---------|----------|--------|
| 1     | mdsim    | NPT      | 300.0     | 10.005         | 62876   | 17968    | 0      |

### Protein Information

|     | Tot. Residues | Prot. Chain(s)                                          | Res. in Chain(s)  | # Atoms | # Heavy Atoms | Charge |
|-----|---------------|---------------------------------------------------------|-------------------|---------|---------------|--------|
|     | 562           | 'NoChainId'                                             | ict_values([562]) | 8798    | 4471          | -10    |
| SSA | 4             | 5 10 15 20 25 30 35 40 45 50 55 60 65 70                |                   |         |               | 73     |
| SSA | 74            | 75 80 85 90 95 100 105 110 115 120 125 130 135 140      |                   |         |               | 143    |
| SSA | 144           | 145 150 155 160 165 170 175 180 185 190 195 200 205 210 |                   |         |               | 213    |
| SSA | 214           | 215 220 225 230 235 240 245 250 255 260 265 270 275 280 |                   |         |               | 283    |
| SSA | 284           | 285 290 295 300 305 310 315 320 325 330 335 340 345 350 |                   |         |               | 353    |
| SSA | 354           | 355 360 365 370 375 380 385 390 395 400 405 410 415 420 |                   |         |               | 423    |
| SSA | 424           | 425 430 435 440 445 450 455 460 465 470 475 480 485 490 |                   |         |               | 493    |
| SSA | 494           | 495 500 505 510 515 520 525 530 535 540 545 550 555 560 |                   |         |               | 563    |
| SSA | 564           | IF                                                      | 565               |         |               |        |

### Ligand Information

|                    |                                                        |
|--------------------|--------------------------------------------------------|
| SMILES             | c1ccccc1\C=C\C(=O)NCCCC[N@H+](C)CCCNC(=O)/C=C/c2ccccc2 |
| PDB Name           | 'UNK'                                                  |
| Num. of Atoms      | 65 (total) 31 (heavy)                                  |
| Atomic Mass        | 420.580 au                                             |
| Charge             | +1                                                     |
| Mol. Formula       | C26H34N3O2                                             |
| Num. of Fragments  | 9                                                      |
| Num. of Rot. Bonds | 15                                                     |

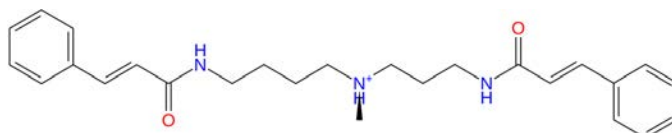

### Counter Ion/Salt Information

| Type | Num. | Concentration [mM] | Total Charge |
|------|------|--------------------|--------------|
| Na   | 59   | 59.702             | +59          |
| Cl   | 50   | 50.595             | -50          |

## Protein-Ligand RMSD

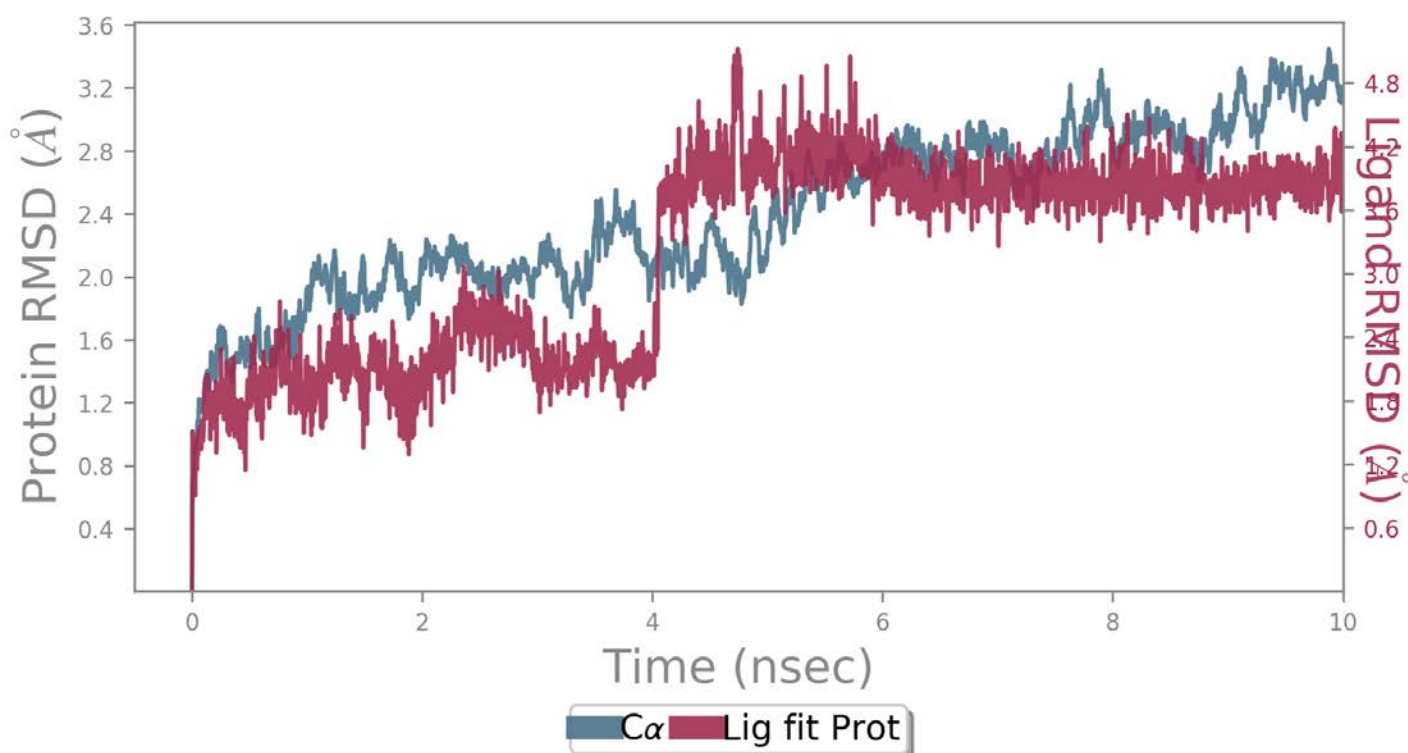

The Root Mean Square Deviation (RMSD) is used to measure the average change in displacement of a selection of atoms for a particular frame with respect to a reference frame. It is calculated for all frames in the trajectory. The RMSD for frame  $x$  is:

$$RMSD_x = \sqrt{\frac{1}{N} \sum_{i=1}^N (r'_i(t_x) - r_i(t_{ref}))^2}$$

where  $N$  is the number of atoms in the atom selection;  $t_{ref}$  is the reference time, (typically the first frame is used as the reference and it is regarded as time  $t=0$ ); and  $r'$  is the position of the selected atoms in frame  $x$  after superimposing on the reference frame, where frame  $x$  is recorded at time  $t_x$ . The procedure is repeated for every frame in the simulation trajectory.

**Protein RMSD:** The above plot shows the RMSD evolution of a protein (left Y-axis). All protein frames are first aligned on the reference frame backbone, and then the RMSD is calculated based on the atom selection. Monitoring the RMSD of the protein can give insights into its structural conformation throughout the simulation. RMSD analysis can indicate if the simulation has equilibrated — its fluctuations towards the end of the simulation are around some thermal average structure. Changes of the order of 1-3 Å are perfectly acceptable for small, globular proteins. Changes much larger than that, however, indicate that the protein is undergoing a large conformational change during the simulation. It is also important that your simulation converges — the RMSD values stabilize around a fixed value. If the RMSD of the protein is still increasing or decreasing on average at the end of the simulation, then your system has not equilibrated, and your simulation may not be long enough for rigorous analysis.

**Ligand RMSD:** Ligand RMSD (right Y-axis) indicates how stable the ligand is with respect to the protein and its binding pocket. In the above plot, 'Lig fit Prot' shows the RMSD of a ligand when the protein-ligand complex is first aligned on the protein backbone of the reference and then the RMSD of the ligand heavy atoms is measured. If the values observed are significantly larger than the RMSD of the protein, then it is likely that the ligand has diffused away from its initial binding site.

## Protein RMSF

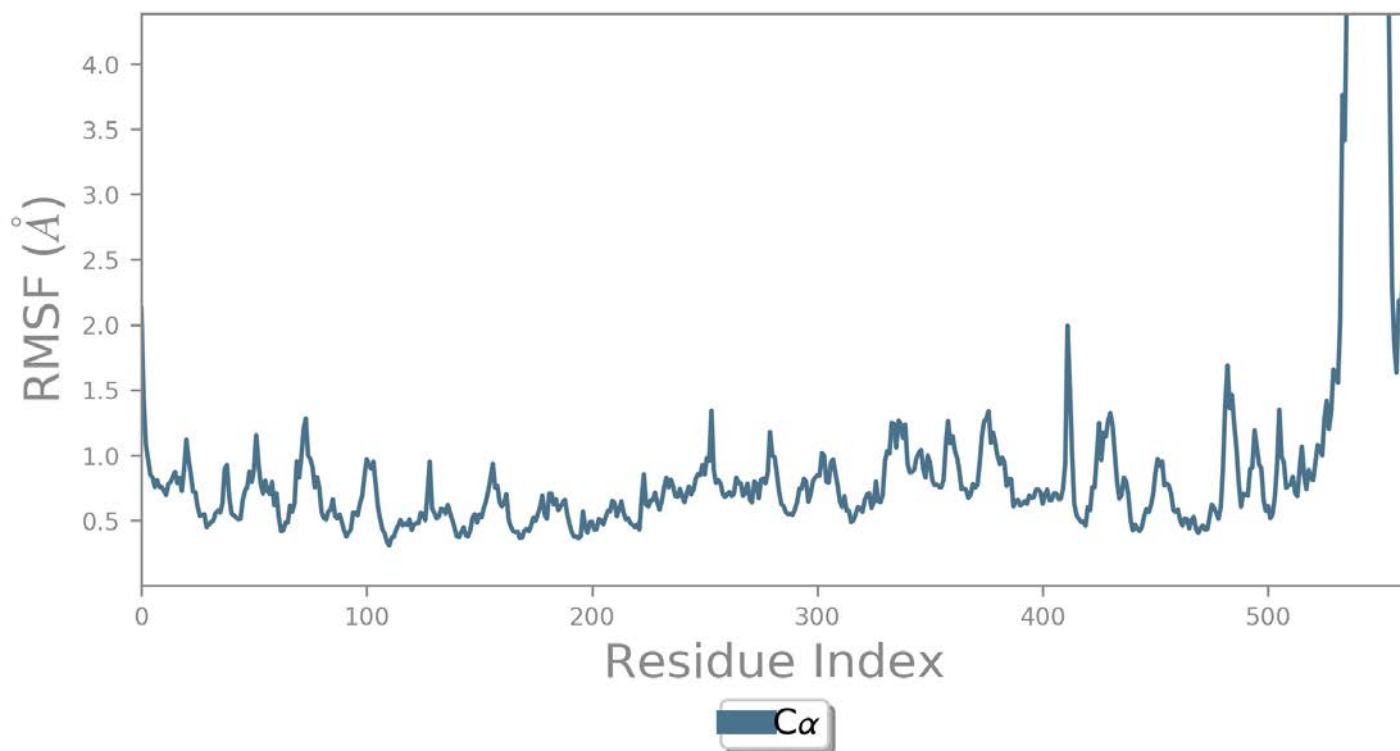

The Root Mean Square Fluctuation (RMSF) is useful for characterizing local changes along the protein chain. The RMSF for residue  $i$  is:

$$RMSF_i = \sqrt{\frac{1}{T} \sum_{t=1}^T \langle (r'_i(t)) - r_i(t_{ref})^2 \rangle}$$

where  $T$  is the trajectory time over which the RMSF is calculated,  $t_{ref}$  is the reference time,  $r_i$  is the position of residue  $i$ ;  $r'$  is the position of atoms in residue  $i$  after superposition on the reference, and the angle brackets indicate that the average of the square distance is taken over the selection of atoms in the residue.

On this plot, peaks indicate areas of the protein that fluctuate the most during the simulation. Typically you will observe that the tails ( $N$ - and  $C$ -terminal) fluctuate more than any other part of the protein. Secondary structure elements like alpha helices and beta strands are usually more rigid than the unstructured part of the protein, and thus fluctuate less than the loop regions.



## Protein Secondary Structure

% Helix 29.66      % Strand 12.92      % Total SSE 42.58

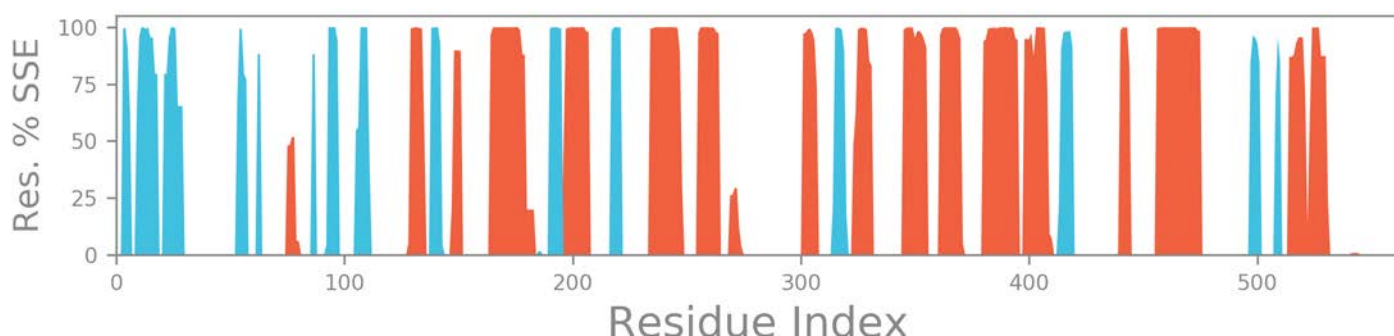

Protein secondary structure elements (SSE) like **alpha-helices** and **beta-strands** are monitored throughout the simulation. The plot above reports SSE distribution by residue index throughout the protein structure. The plot below summarizes the SSE composition for each trajectory frame over the course of the simulation, and the plot at the bottom monitors each residue and its SSE assignment over time.

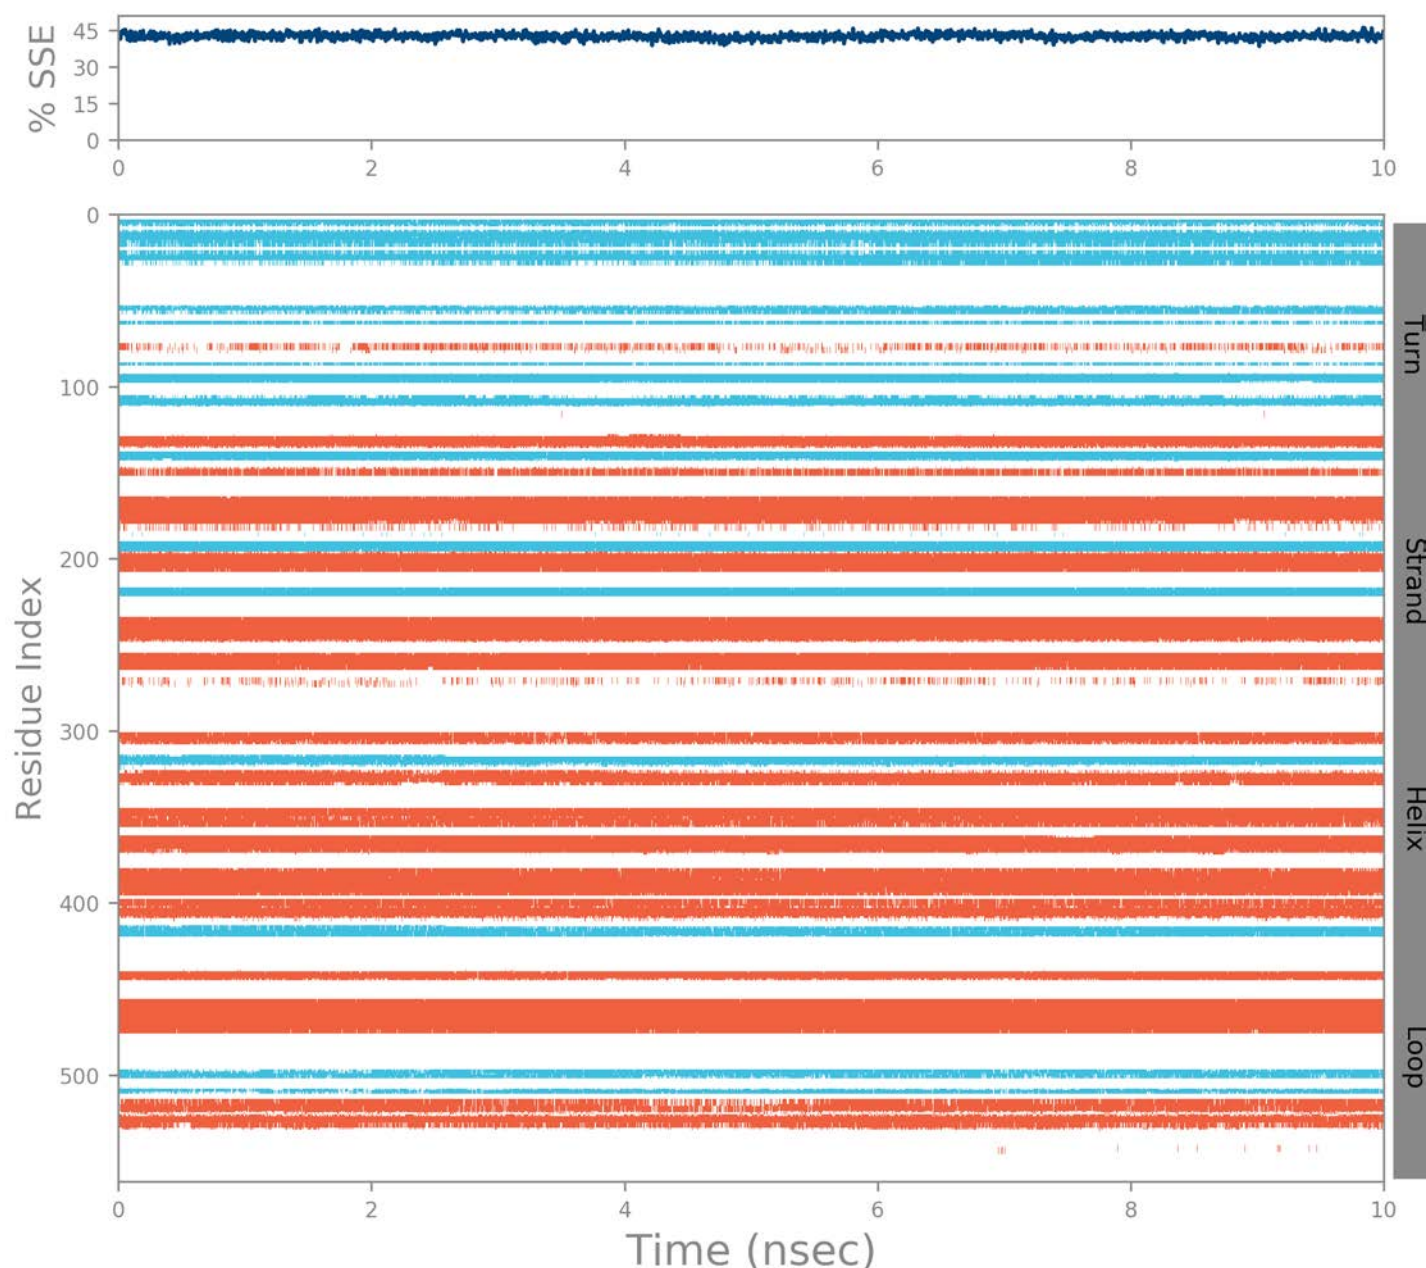

## 5-*N*-Methylmaitenine Ligand RMSF

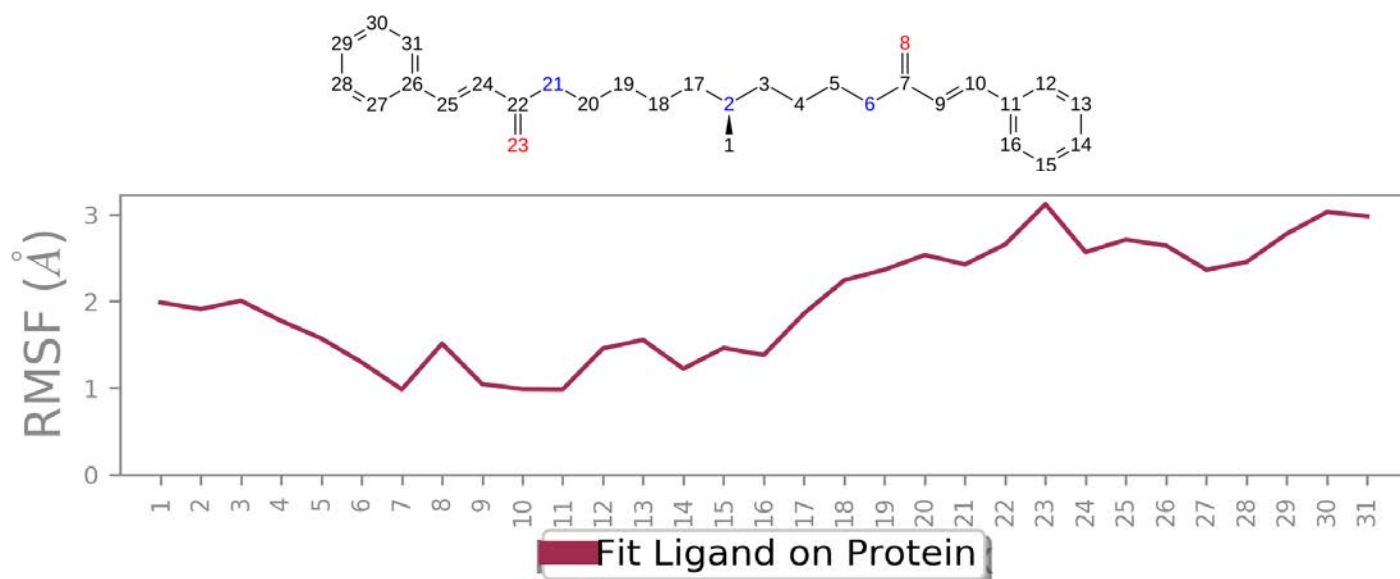

The Ligand Root Mean Square Fluctuation (L-RMSF) is useful for characterizing changes in the ligand atom positions. The RMSF for atom  $i$  is:

$$RMSF_i = \sqrt{\frac{1}{T} \sum_{t=1}^T (r'_i(t) - r_i(t_{ref}))^2}$$

where  $T$  is the trajectory time over which the RMSF is calculated,  $t_{ref}$  is the reference time (usually for the first frame, and is regarded as the zero of time);  $r$  is the position of atom  $i$  in the reference at time  $t_{ref}$  and  $r'$  is the position of atom  $i$  at time  $t$  after superposition on the reference frame.

Ligand RMSF shows the ligand's fluctuations broken down by atom, corresponding to the 2D structure in the top panel. The ligand RMSF may give you insights on how ligand fragments interact with the protein and their entropic role in the binding event. In the bottom panel, the 'Fit Ligand on Protein' line shows the ligand fluctuations, with respect to the protein. The protein-ligand complex is first aligned on the protein backbone and then the ligand RMSF is measured on the ligand heavy atoms.

## Protein-Ligand Contacts

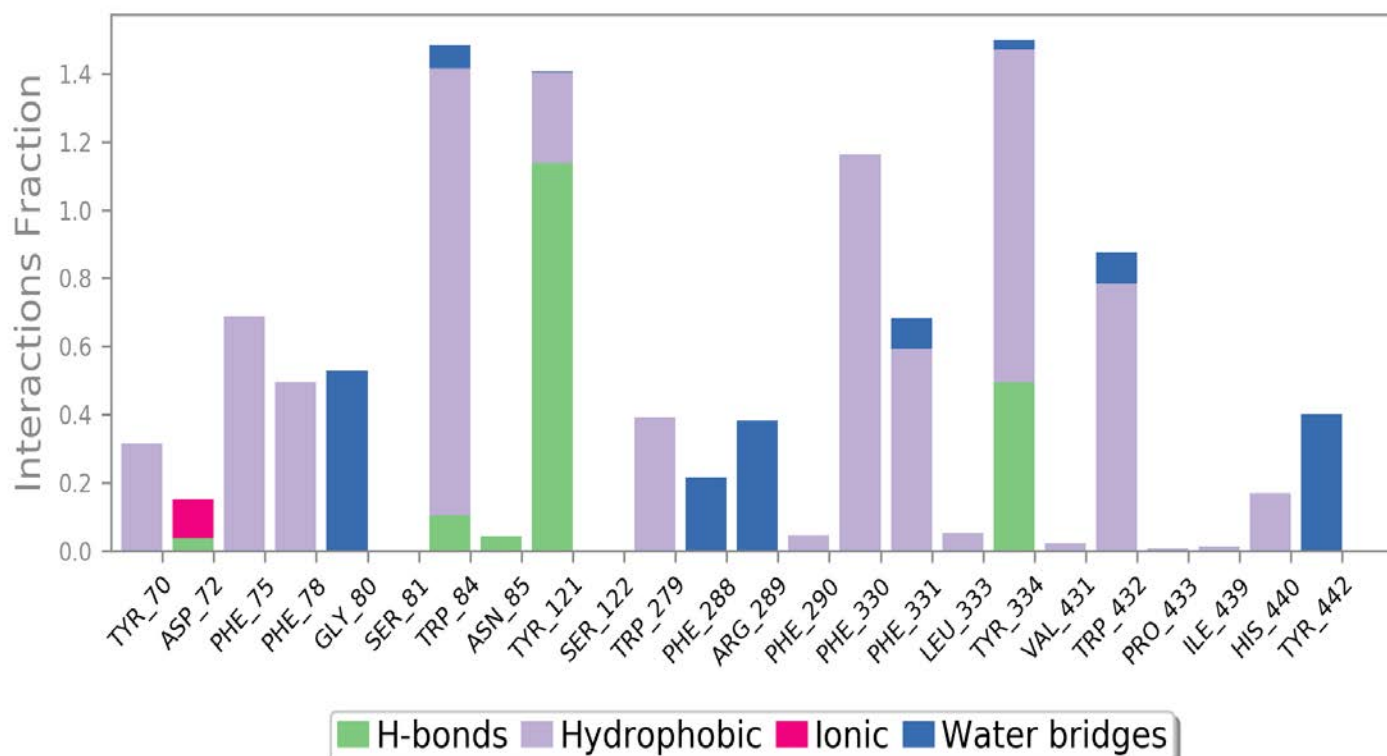

Protein interactions with the ligand can be monitored throughout the simulation. These interactions can be categorized by type and summarized, as shown in the plot above. Protein-ligand interactions (or 'contacts') are categorized into four types: Hydrogen Bonds, Hydrophobic, Ionic and Water Bridges. Each interaction type contains more specific subtypes, which can be explored through the 'Simulation Interactions Diagram' panel. The stacked bar charts are normalized over the course of the trajectory: for example, a value of 0.7 suggests that 70% of the simulation time the specific interaction is maintained. Values over 1.0 are possible as some protein residue may make multiple contacts of same subtype with the ligand.

**Hydrogen Bonds:** (H-bonds) play a significant role in ligand binding. Consideration of hydrogen-bonding properties in drug design is important because of their strong influence on drug specificity, metabolism and adsorption. Hydrogen bonds between a protein and a ligand can be further broken down into four subtypes: backbone acceptor; backbone donor; side-chain acceptor; side-chain donor.

The current geometric criteria for protein-ligand H-bond is: distance of 2.5 Å between the donor and acceptor atoms (D—H...A); a donor angle of  $\geq 120^\circ$  between the donor-hydrogen-acceptor atoms (D—H...A); and an acceptor angle of  $\geq 90^\circ$  between the hydrogen-acceptor-bonded\_atom atoms (H...A—X).

**Hydrophobic contacts:** fall into three subtypes:  $\pi$ -Cation;  $\pi$ - $\pi$ ; and Other, non-specific interactions. Generally these type of interactions involve a hydrophobic amino acid and an aromatic or aliphatic group on the ligand, but we have extended this category to also include  $\pi$ -Cation interactions.

The current geometric criteria for hydrophobic interactions is as follows:  $\pi$ -Cation — Aromatic and charged groups within 4.5 Å;  $\pi$ - $\pi$  — Two aromatic groups stacked face-to-face or face-to-edge; Other — A non-specific hydrophobic sidechain within 3.6 Å of a ligand's aromatic or aliphatic carbons.

**Ionic interactions:** or polar interactions, are between two oppositely charged atoms that are within 3.7 Å of each other and do not involve a hydrogen bond. We also monitor Protein-Metal-Ligand interactions, which are defined by a metal ion coordinated within 3.4 Å of protein's and ligand's heavy atoms (except carbon). All ionic interactions are broken down into two subtypes: those mediated by a protein backbone or side chains.

**Water Bridges:** are hydrogen-bonded protein-ligand interactions mediated by a water molecule. The hydrogen-bond geometry is slightly relaxed from the standard H-bond definition.

The current geometric criteria for a protein-water or water-ligand H-bond are: a distance of 2.8 Å between the donor and acceptor atoms (D—H...A); a donor angle of  $\geq 110^\circ$  between the donor-hydrogen-acceptor atoms (D—H...A); and an acceptor angle of  $\geq 90^\circ$  between the hydrogen-acceptor-bonded\_atom atoms (H...A—X).

## Protein-Ligand Contacts (cont.)

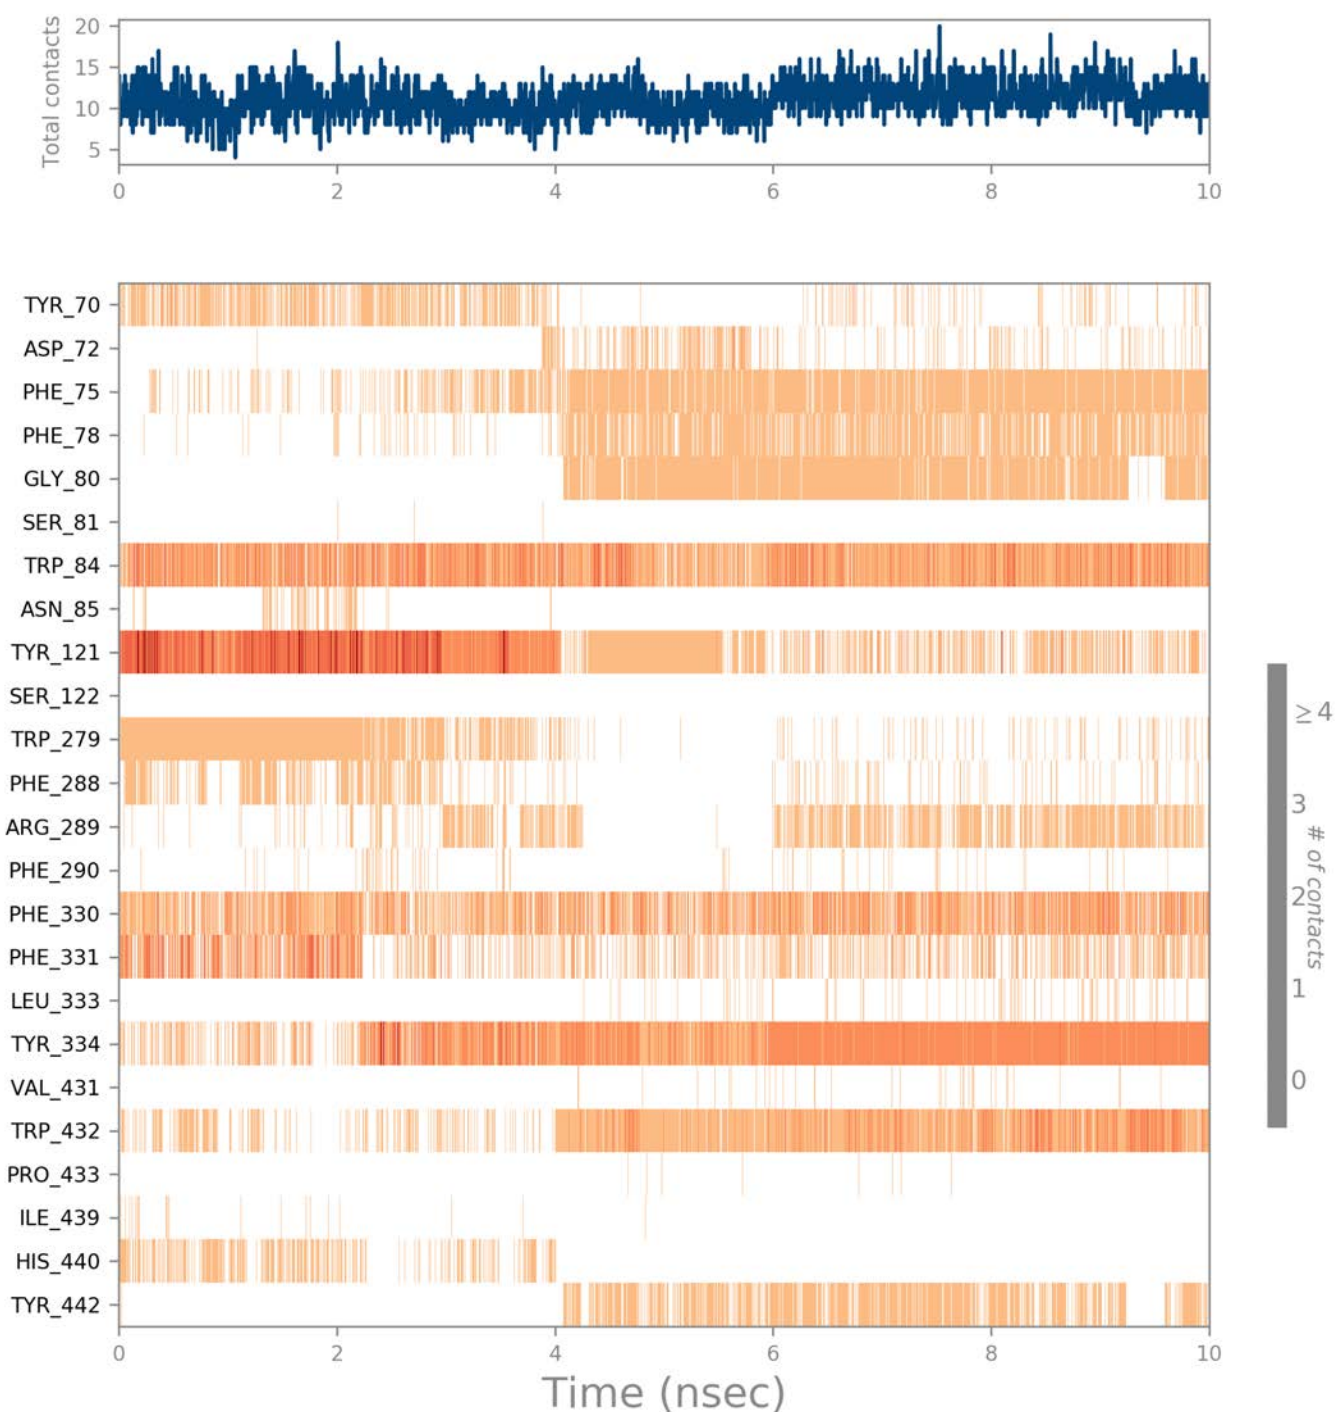

A timeline representation of the interactions and contacts (**H-bonds, Hydrophobic, Ionic, Water bridges**) summarized in the previous page. The top panel shows the total number of specific contacts the protein makes with the ligand over the course of the trajectory. The bottom panel shows which residues interact with the ligand in each trajectory frame. Some residues make more than one specific contact with the ligand, which is represented by a darker shade of orange, according to the scale to the right of the plot.



## Ligand-Protein Contacts

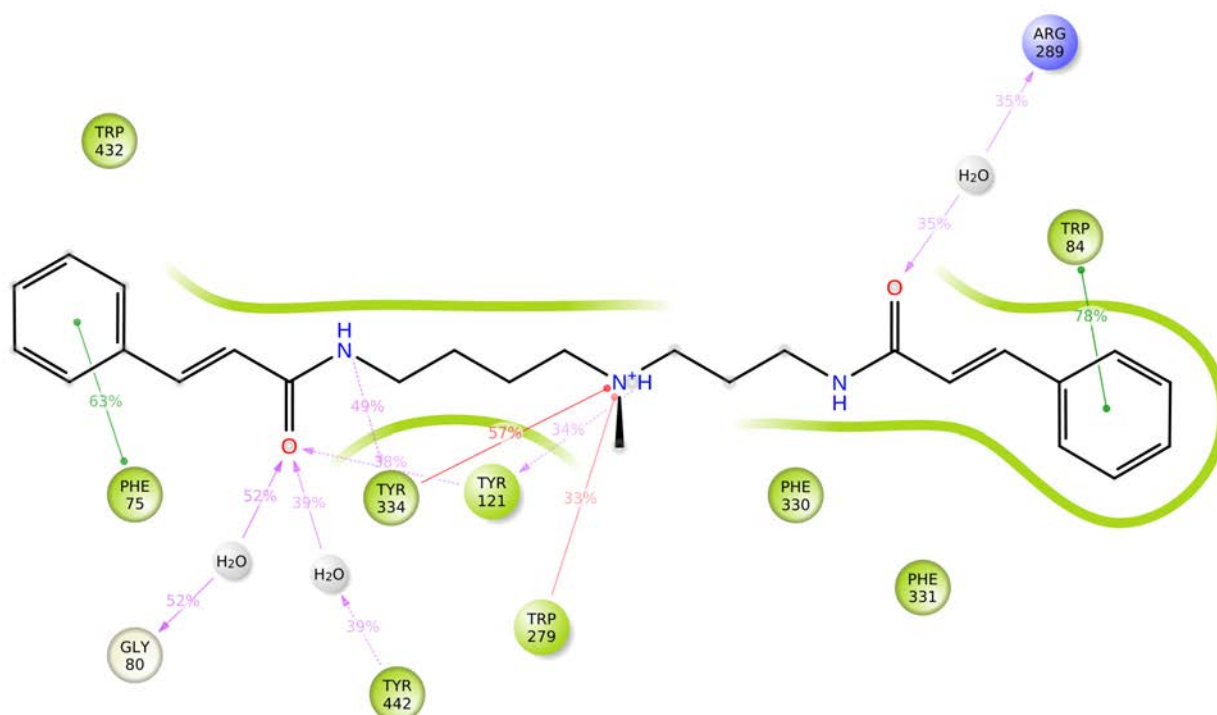

- Charged (positive)
- Hydrophobic
- Glycine
- Water
- Pi-Pi stacking
- Pi-cation
- Solvent exposure

A schematic of detailed ligand atom interactions with the protein residues. Interactions that occur more than **30.0%** of the simulation time in the selected trajectory ( 0.00 through 10.00 nsec), are shown.  
 Note: it is possible to have interactions with >100% as some residues may have multiple interactions of a single type with the same ligand atom. For example, the ARG side chain has four H-bond donors that can all hydrogen-bond to a single H-bond acceptor.

## Ligand Torsion Profile

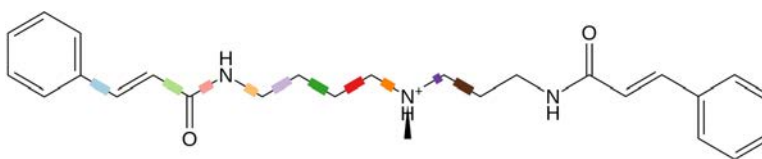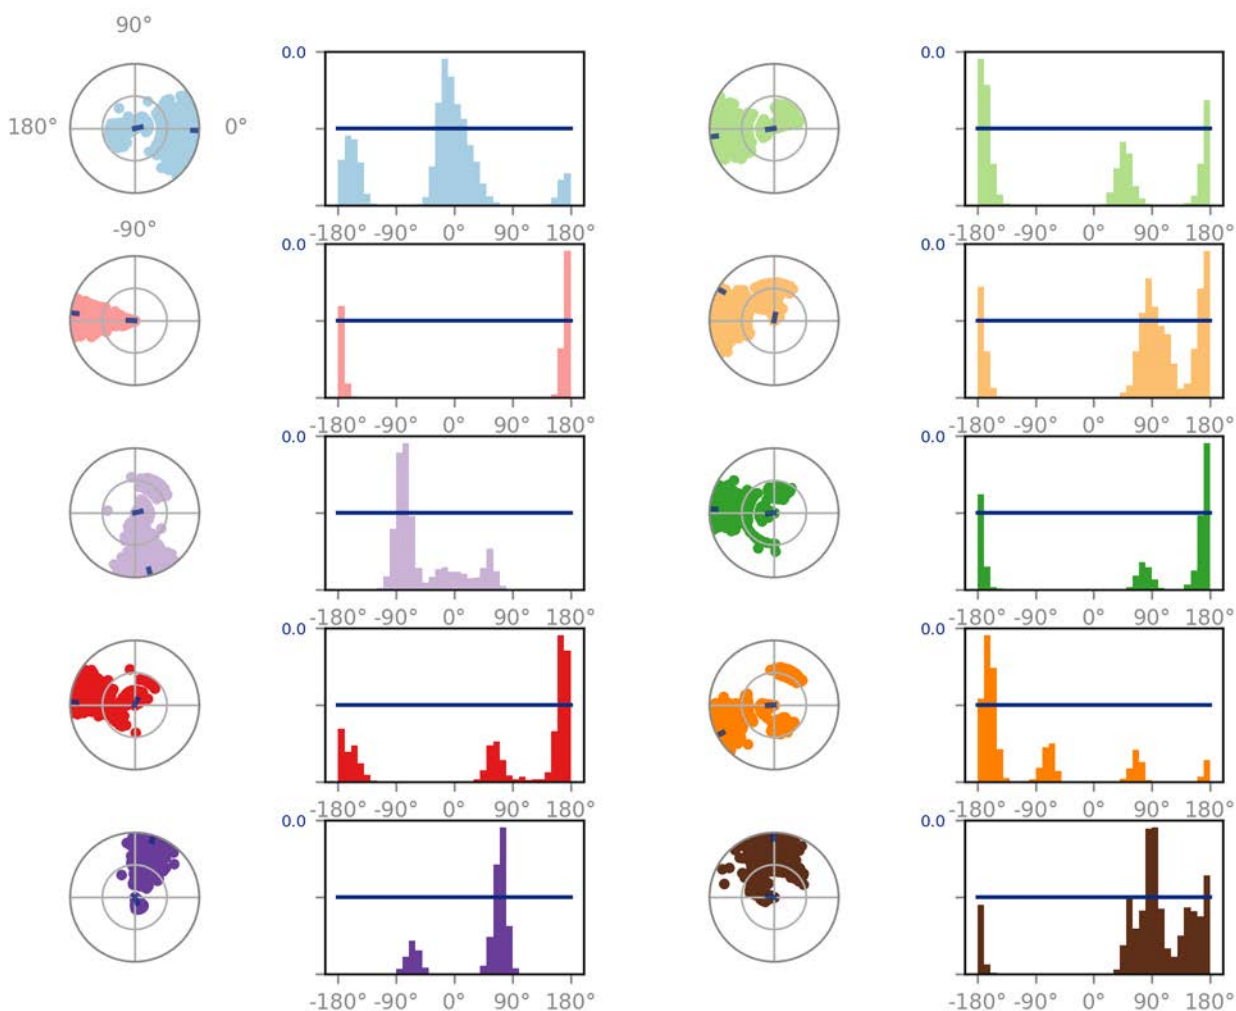

## Ligand Torsion Profile (cont.)

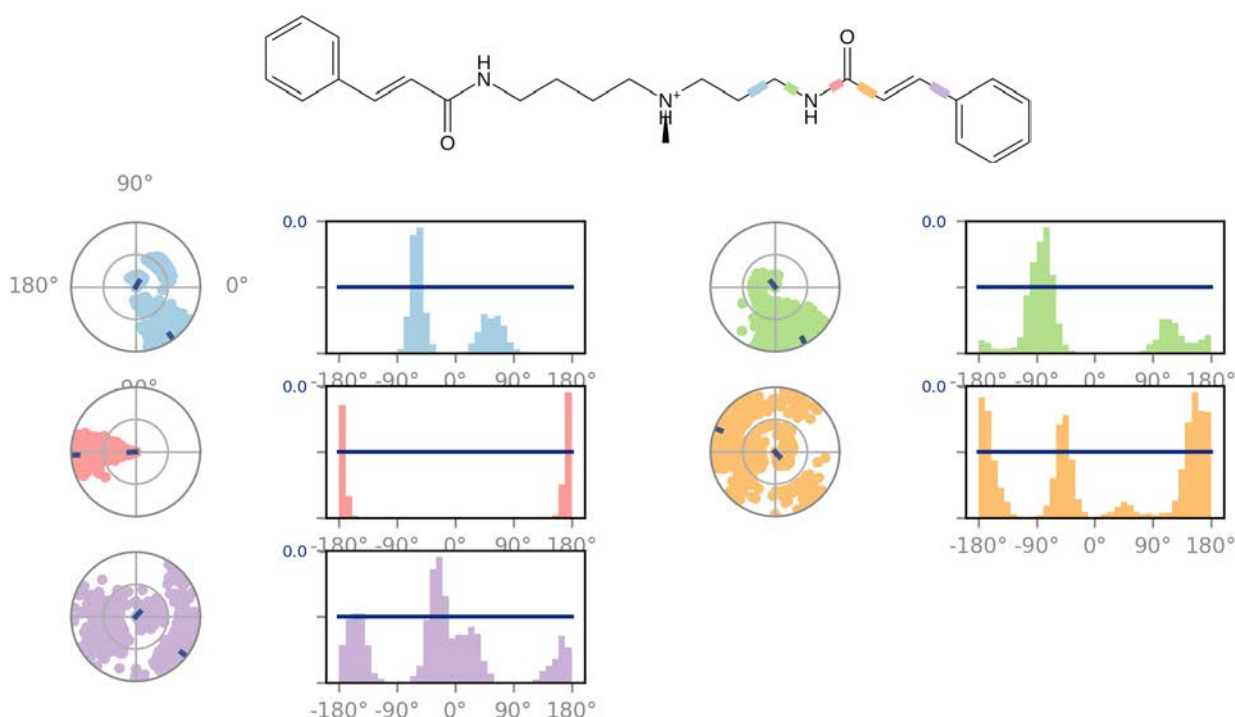

The ligand torsions plot summarizes the conformational evolution of every rotatable bond (RB) in the ligand throughout the simulation trajectory ( 0.00 through 10.00 nsec). The top panel shows the 2d schematic of a ligand with color-coded rotatable bonds. Each rotatable bond torsion is accompanied by a dial plot and bar plots of the same color.

Dial (or radial) plots describe the conformation of the torsion throughout the course of the simulation. The beginning of the simulation is in the center of the radial plot and the time evolution is plotted radially outwards.

The bar plots summarize the data on the dial plots, by showing the probability density of the torsion. If torsional potential information is available, the plot also shows the potential of the rotatable bond (by summing the potential of the related torsions). The values of the potential are on the left Y-axis of the chart, and are expressed in *kcal/mol*. Looking at the histogram and torsion potential relationships may give insights into the conformational strain the ligand undergoes to maintain a protein-bound conformation.

## Ligand Properties

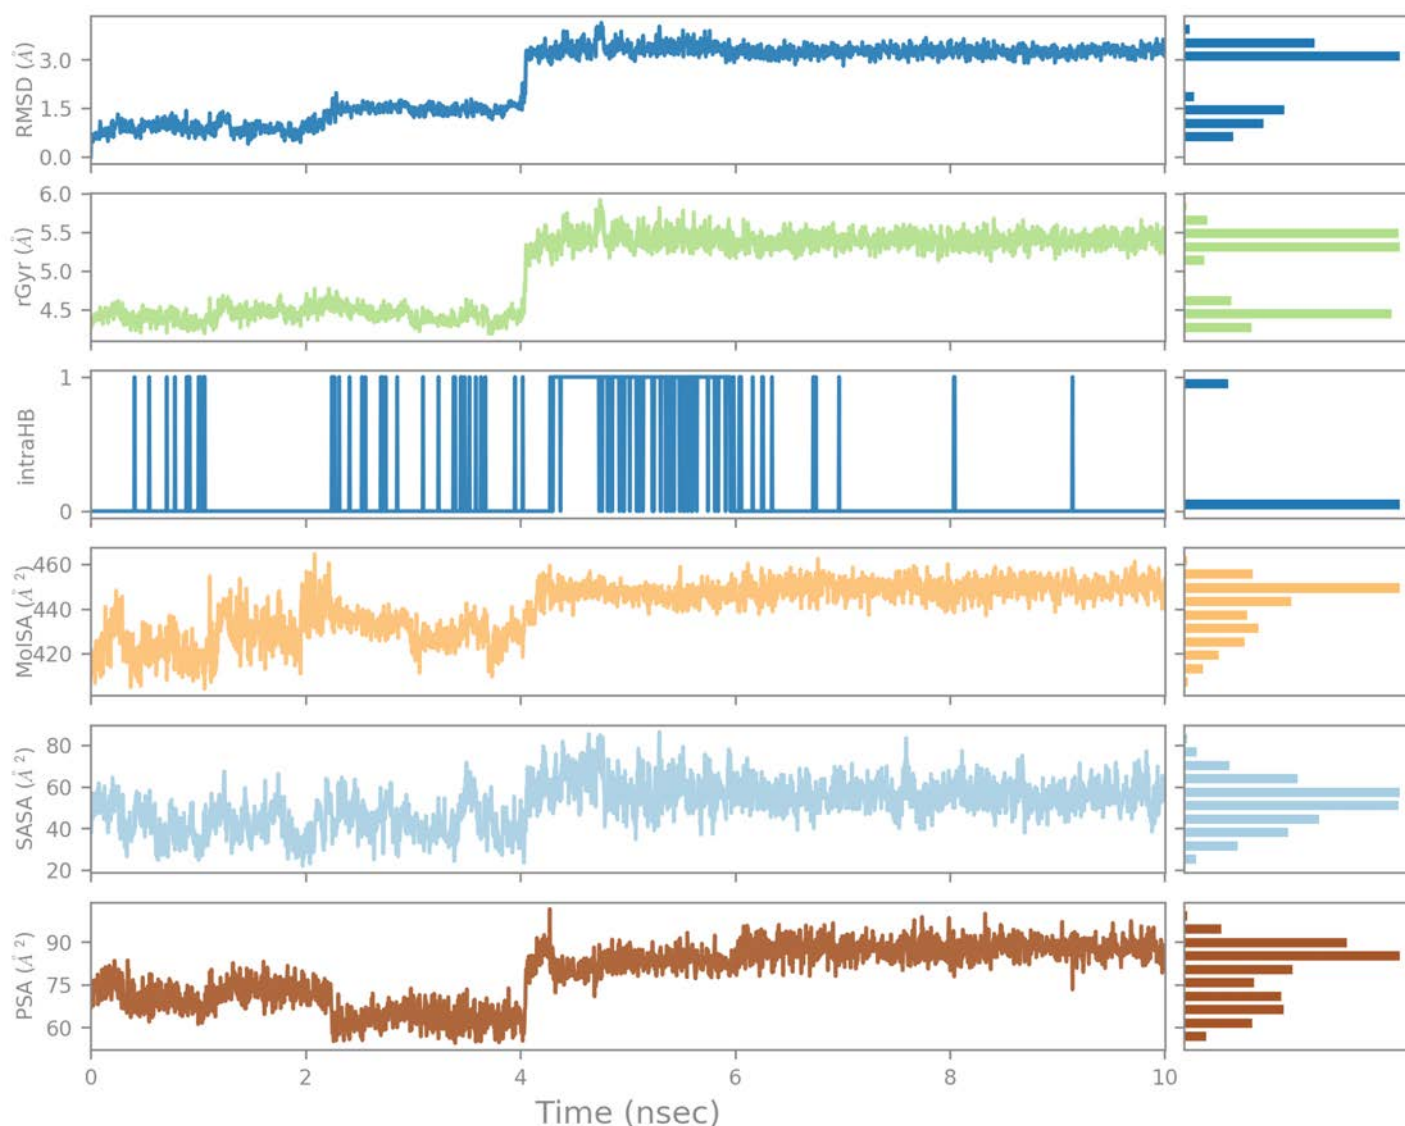

**Ligand RMSD:** Root mean square deviation of a ligand with respect to the reference conformation (typically the first frame is used as the reference and it is regarded as time  $t=0$ ).

**Radius of Gyration (rGyr):** Measures the 'extendedness' of a ligand, and is equivalent to its principal moment of inertia.

**Intramolecular Hydrogen Bonds (intraHB):** Number of internal hydrogen bonds (HB) within a ligand molecule.

**Molecular Surface Area (MolSA):** Molecular surface calculation with 1.4 Å probe radius. This value is equivalent to a van der Waals surface area.

**Solvent Accessible Surface Area (SASA):** Surface area of a molecule accessible by a water molecule.

**Polar Surface Area (PSA):** Solvent accessible surface area in a molecule contributed only by oxygen and nitrogen atoms.

## Report S6

# MD Simulation Report on AChE - *N-trans-Feruloyl*tyramine Interactions

### Simulation Details

Jobname: md\_job\_6H12\_5-vina\_1  
Entry title: 5-dock-1-rec

| CPU # | Job Type | Ensemble | Temp. [K] | Sim. Time [ns] | # Atoms | # Waters | Charge |
|-------|----------|----------|-----------|----------------|---------|----------|--------|
| 1     | mdsim    | NPT      | 300.0     | 10.005         | 62851   | 17967    | 0      |

### Protein Information

| Tot. Residues | Prot. Chain(s) | Res. in Chain(s)  | # Atoms | # Heavy Atoms | Charge |
|---------------|----------------|-------------------|---------|---------------|--------|
| 562           | 'NoChainId'    | ict_values([562]) | 8798    | 4471          | -10    |

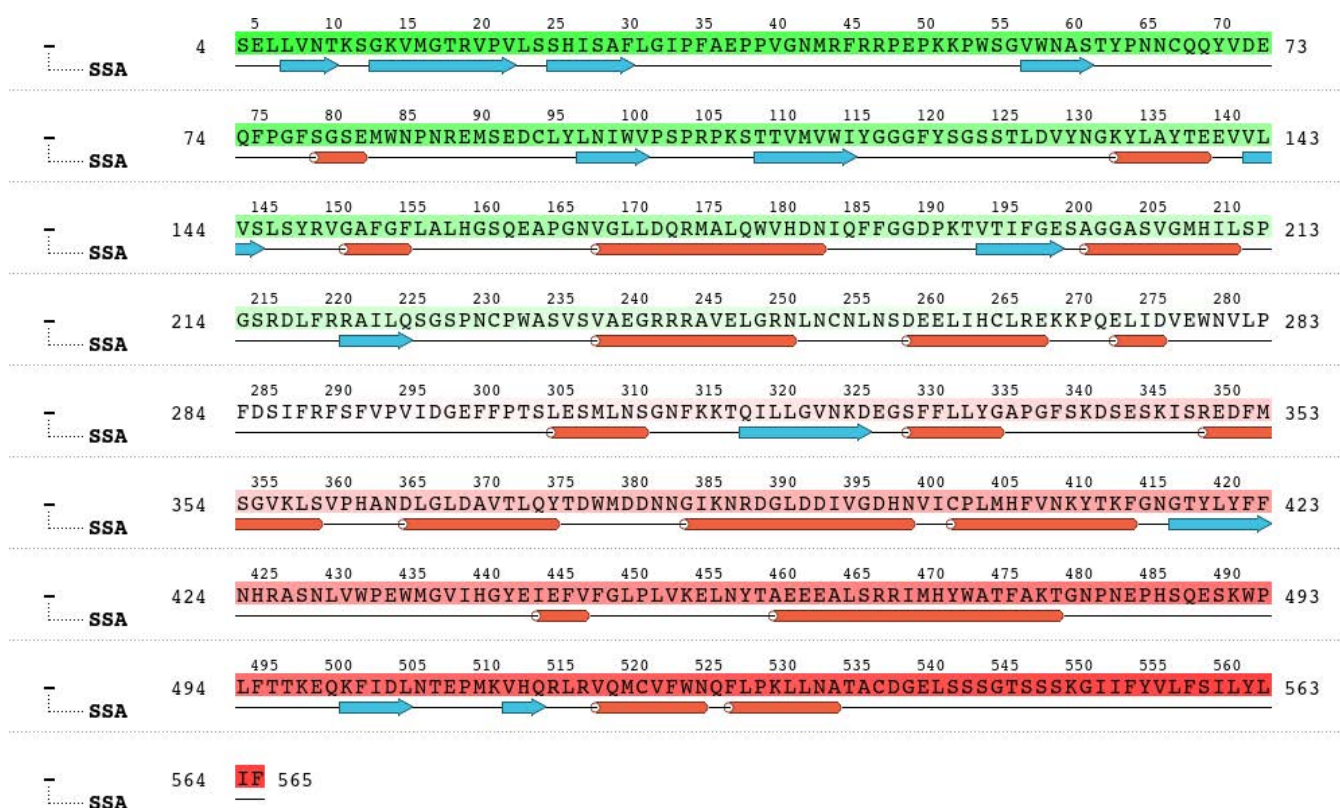

### Ligand Information

|                    |                                         |
|--------------------|-----------------------------------------|
| SMILES             | COc(cc1)c(O)cc1\C=C\C(=O)NCCc2ccc(O)cc2 |
| PDB Name           | 'UNK'                                   |
| Num. of Atoms      | 42 (total) 23 (heavy)                   |
| Atomic Mass        | 313.356 au                              |
| Charge             | 0                                       |
| Mol. Formula       | C18H19NO4                               |
| Num. of Fragments  | 4                                       |
| Num. of Rot. Bonds | 9                                       |

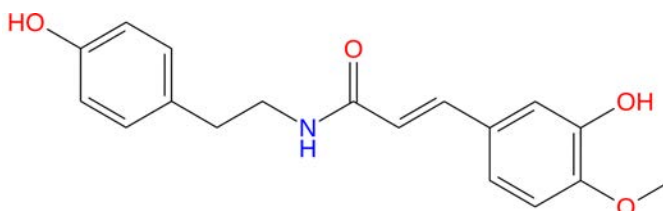

### Counter Ion/Salt Information

| Type | Num. | Concentration [mM] | Total Charge |
|------|------|--------------------|--------------|
| Na   | 60   | 60.717             | +60          |
| Cl   | 50   | 50.598             | -50          |



## Protein-Ligand RMSD

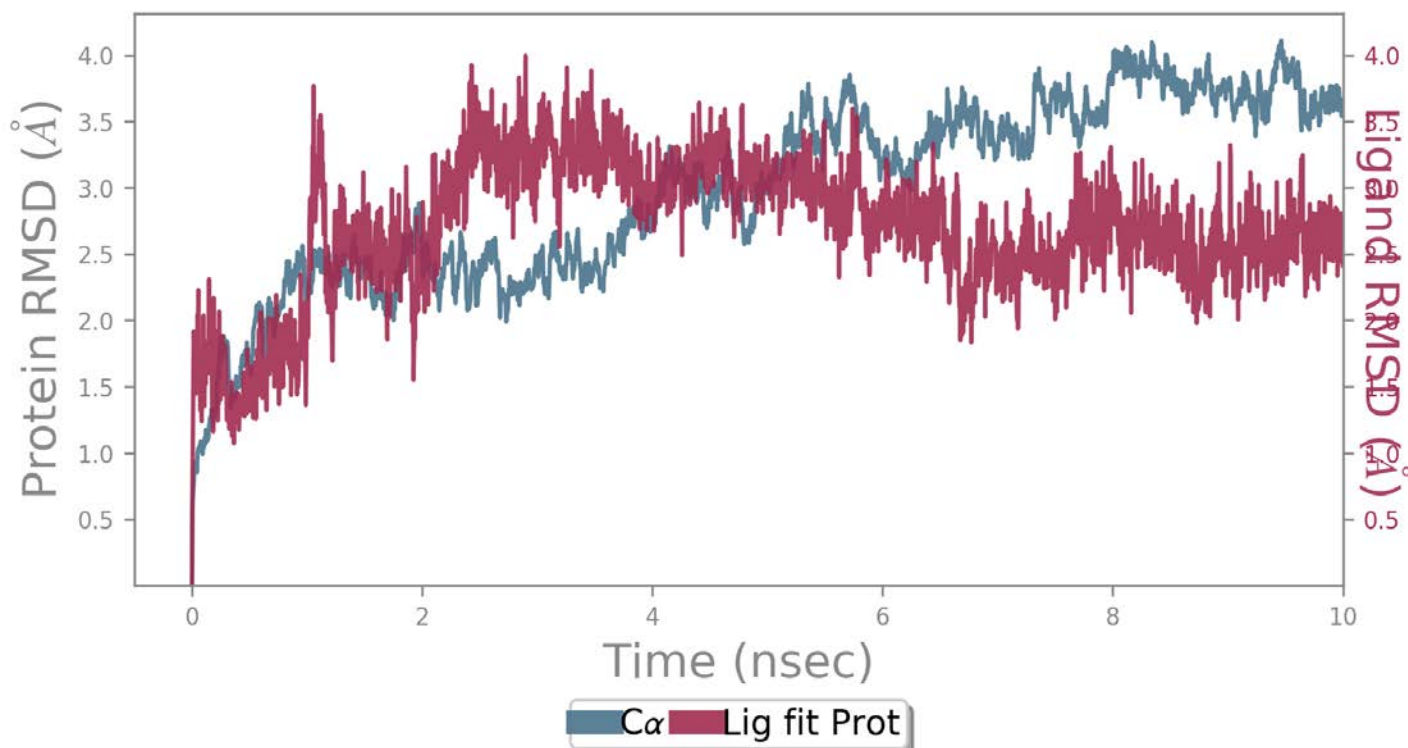

The Root Mean Square Deviation (RMSD) is used to measure the average change in displacement of a selection of atoms for a particular frame with respect to a reference frame. It is calculated for all frames in the trajectory. The RMSD for frame  $x$  is:

$$RMSD_x = \sqrt{\frac{1}{N} \sum_{i=1}^N (r'_i(t_x) - r_i(t_{ref}))^2}$$

where  $N$  is the number of atoms in the atom selection;  $t_{ref}$  is the reference time, (typically the first frame is used as the reference and it is regarded as time  $t=0$ ); and  $r'$  is the position of the selected atoms in frame  $x$  after superimposing on the reference frame, where frame  $x$  is recorded at time  $t_x$ . The procedure is repeated for every frame in the simulation trajectory.

**Protein RMSD:** The above plot shows the RMSD evolution of a protein (left Y-axis). All protein frames are first aligned on the reference frame backbone, and then the RMSD is calculated based on the atom selection. Monitoring the RMSD of the protein can give insights into its structural conformation throughout the simulation. RMSD analysis can indicate if the simulation has equilibrated — its fluctuations towards the end of the simulation are around some thermal average structure. Changes of the order of 1-3 Å are perfectly acceptable for small, globular proteins. Changes much larger than that, however, indicate that the protein is undergoing a large conformational change during the simulation. It is also important that your simulation converges — the RMSD values stabilize around a fixed value. If the RMSD of the protein is still increasing or decreasing on average at the end of the simulation, then your system has not equilibrated, and your simulation may not be long enough for rigorous analysis.

**Ligand RMSD:** Ligand RMSD (right Y-axis) indicates how stable the ligand is with respect to the protein and its binding pocket. In the above plot, 'Lig fit Prot' shows the RMSD of a ligand when the protein-ligand complex is first aligned on the protein backbone of the reference and then the RMSD of the ligand heavy atoms is measured. If the values observed are significantly larger than the RMSD of the protein, then it is likely that the ligand has diffused away from its initial binding site.

## Protein RMSF

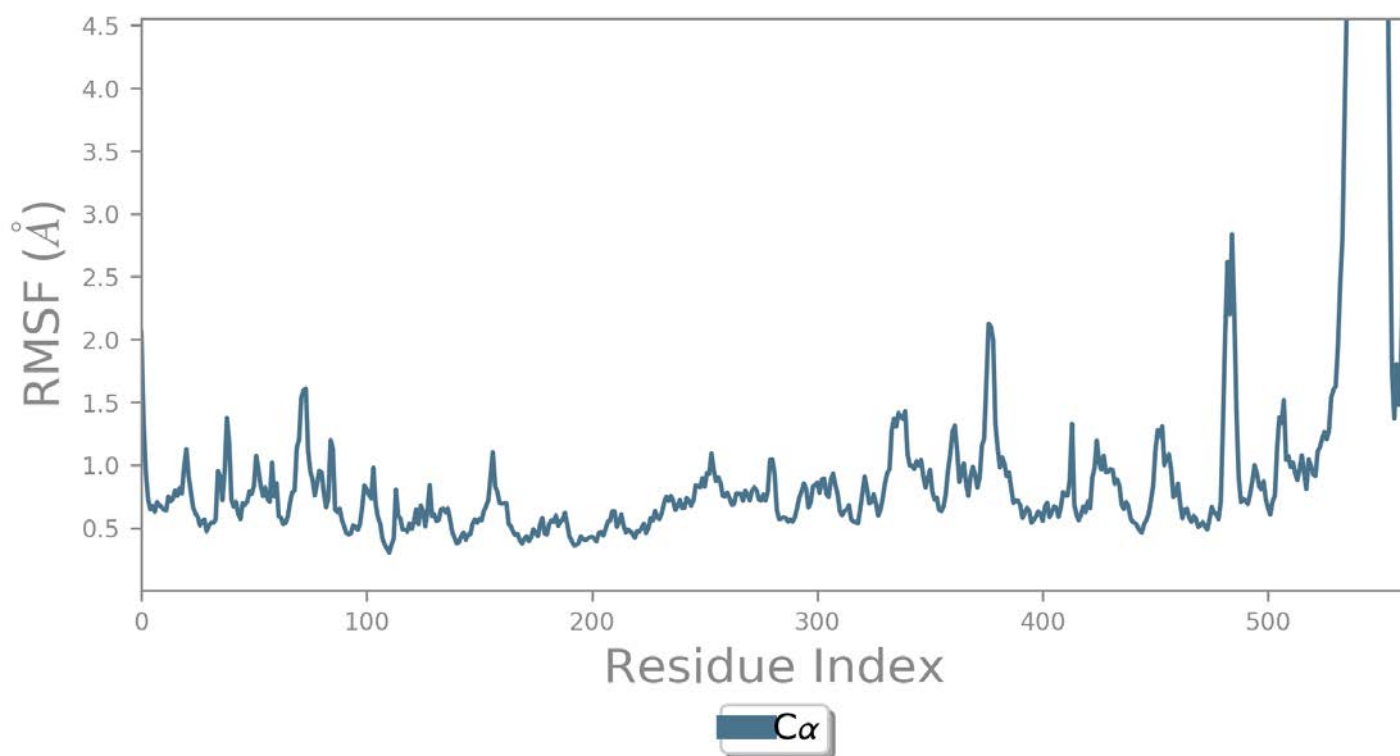

The Root Mean Square Fluctuation (RMSF) is useful for characterizing local changes along the protein chain. The RMSF for residue  $i$  is:

$$RMSF_i = \sqrt{\frac{1}{T} \sum_{t=1}^T \langle (r'_i(t)) - r_i(t_{ref})^2 \rangle}$$

where  $T$  is the trajectory time over which the RMSF is calculated,  $t_{ref}$  is the reference time,  $r_i$  is the position of residue  $i$ ;  $r'$  is the position of atoms in residue  $i$  after superposition on the reference, and the angle brackets indicate that the average of the square distance is taken over the selection of atoms in the residue.

On this plot, peaks indicate areas of the protein that fluctuate the most during the simulation. Typically you will observe that the tails ( $N$ - and  $C$ -terminal) fluctuate more than any other part of the protein. Secondary structure elements like alpha helices and beta strands are usually more rigid than the unstructured part of the protein, and thus fluctuate less than the loop regions.

## Protein Secondary Structure

% Helix  
28.93

% Strand  
13.26

% Total SSE  
42.19

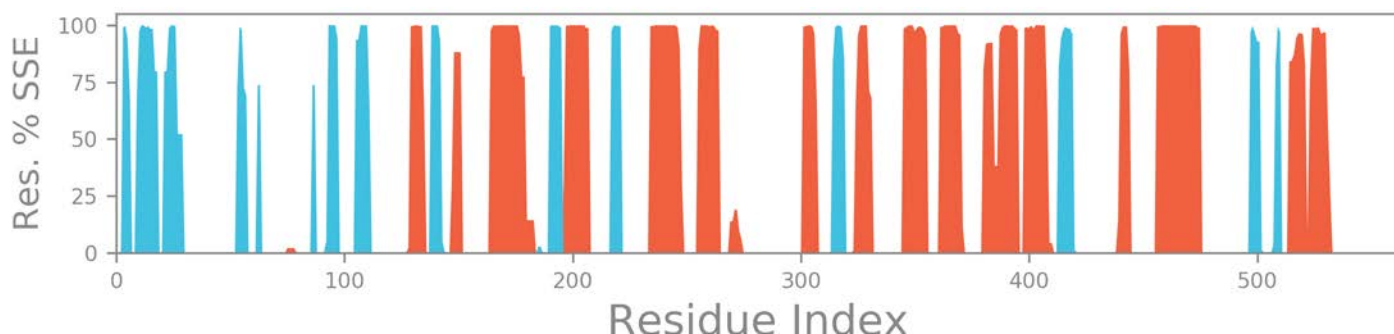

Protein secondary structure elements (SSE) like **alpha-helices** and **beta-strands** are monitored throughout the simulation. The plot above reports SSE distribution by residue index throughout the protein structure. The plot below summarizes the SSE composition for each trajectory frame over the course of the simulation, and the plot at the bottom monitors each residue and its SSE assignment over time.

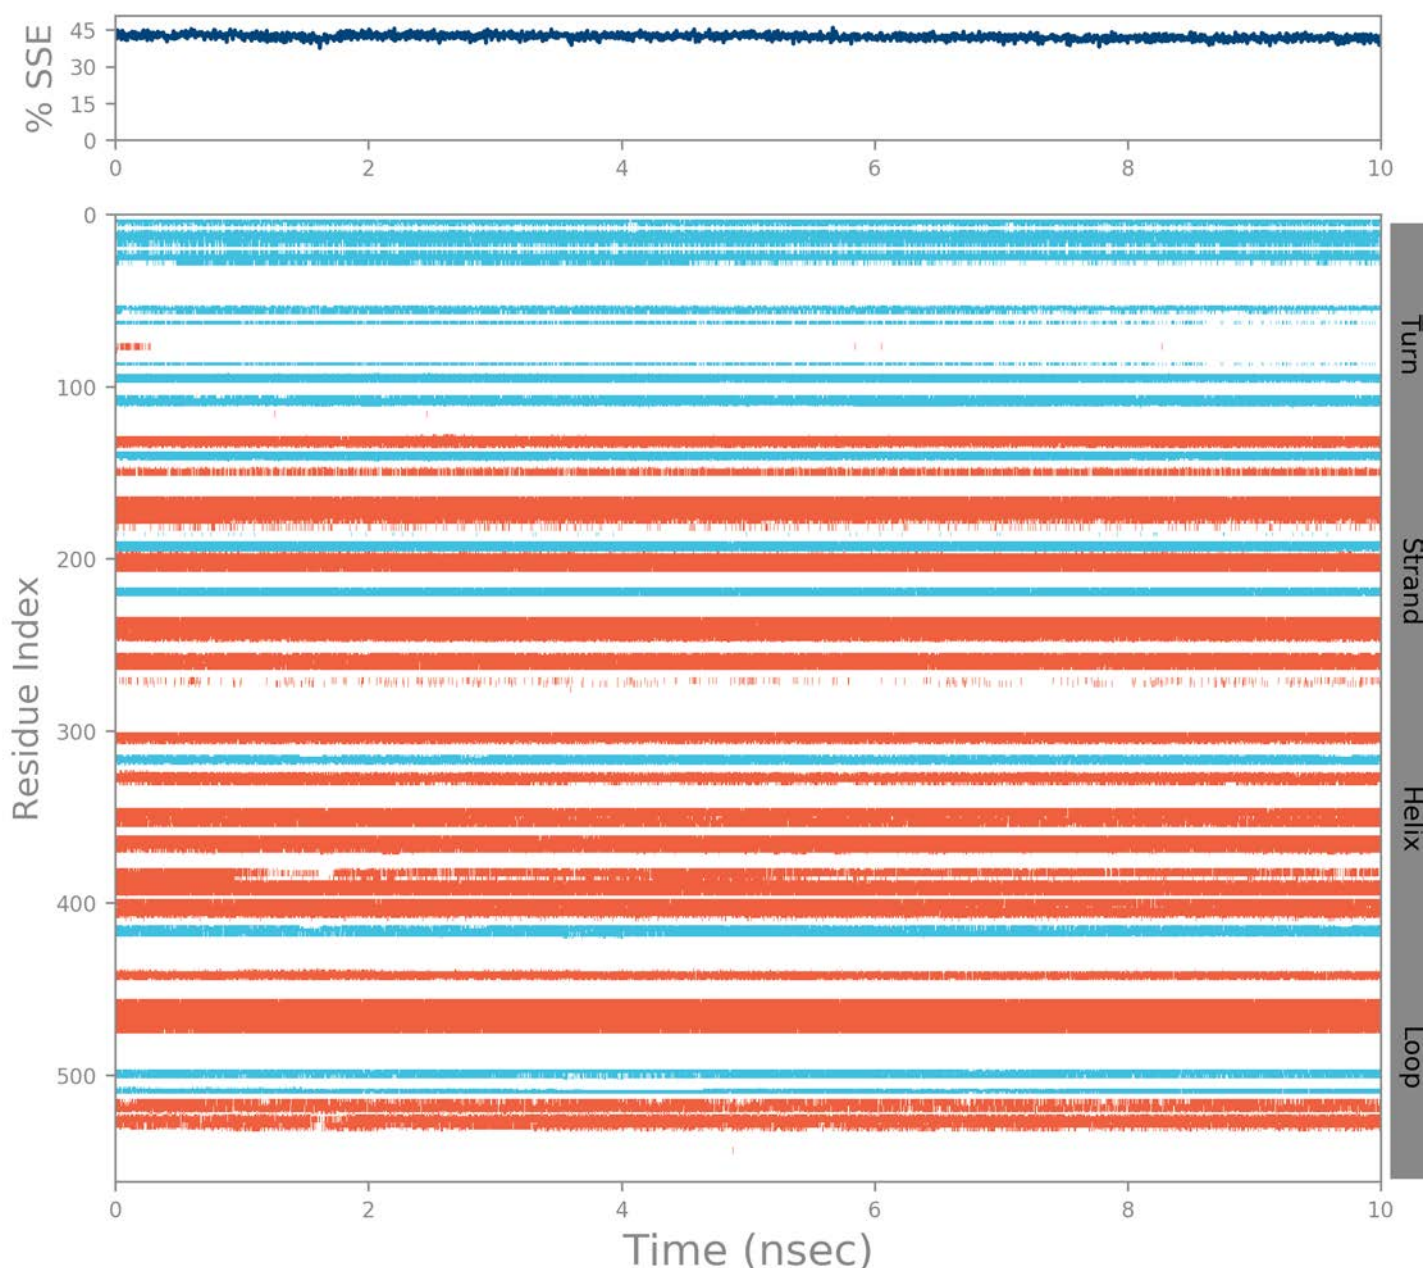



## RMSF of *N-trans*-Feruloyltyramine Ligand

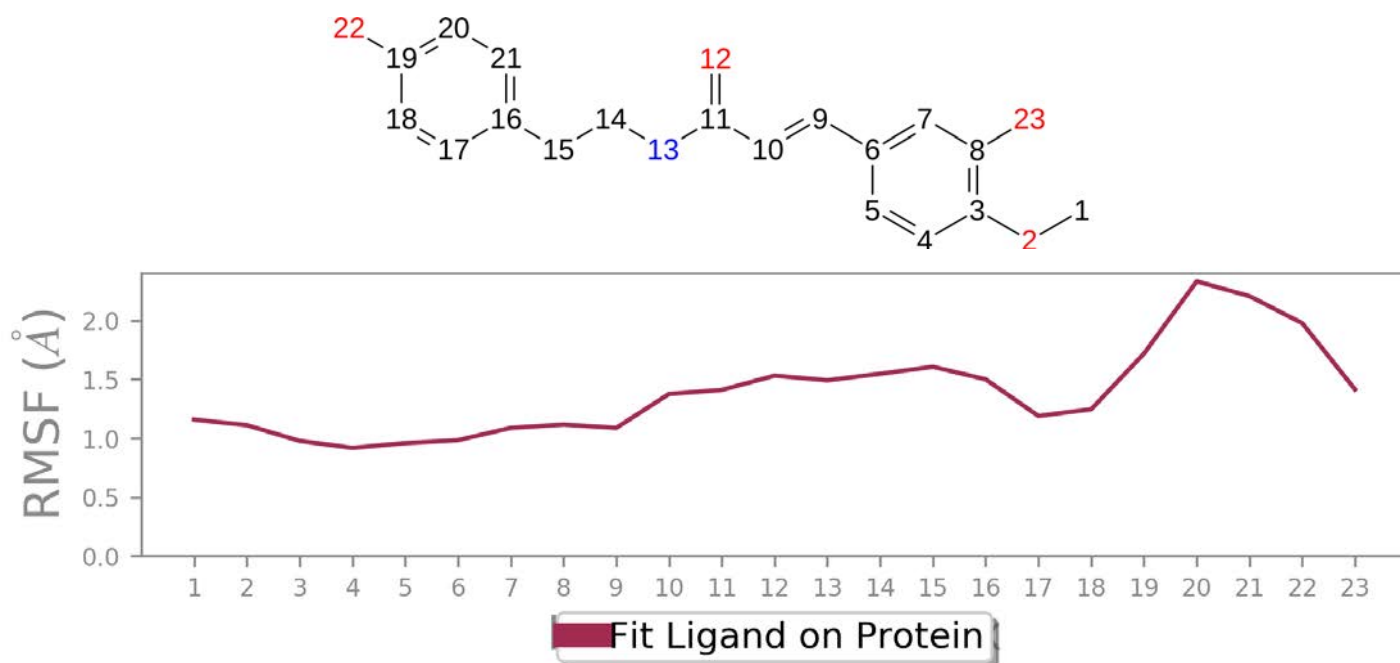

The Ligand Root Mean Square Fluctuation (L-RMSF) is useful for characterizing changes in the ligand atom positions. The RMSF for atom  $i$  is:

$$RMSF_i = \sqrt{\frac{1}{T} \sum_{t=1}^T (r'_i(t) - r_i(t_{ref}))^2}$$

where  $T$  is the trajectory time over which the RMSF is calculated,  $t_{ref}$  is the reference time (usually for the first frame, and is regarded as the zero of time);  $r$  is the position of atom  $i$  in the reference at time  $t_{ref}$  and  $r'$  is the position of atom  $i$  at time  $t$  after superposition on the reference frame.

Ligand RMSF shows the ligand's fluctuations broken down by atom, corresponding to the 2D structure in the top panel. The ligand RMSF may give you insights on how ligand fragments interact with the protein and their entropic role in the binding event. In the bottom panel, the 'Fit Ligand on Protein' line shows the ligand fluctuations, with respect to the protein. The protein-ligand complex is first aligned on the protein backbone and then the ligand RMSF is measured on the ligand heavy atoms.

## Protein-Ligand Contacts

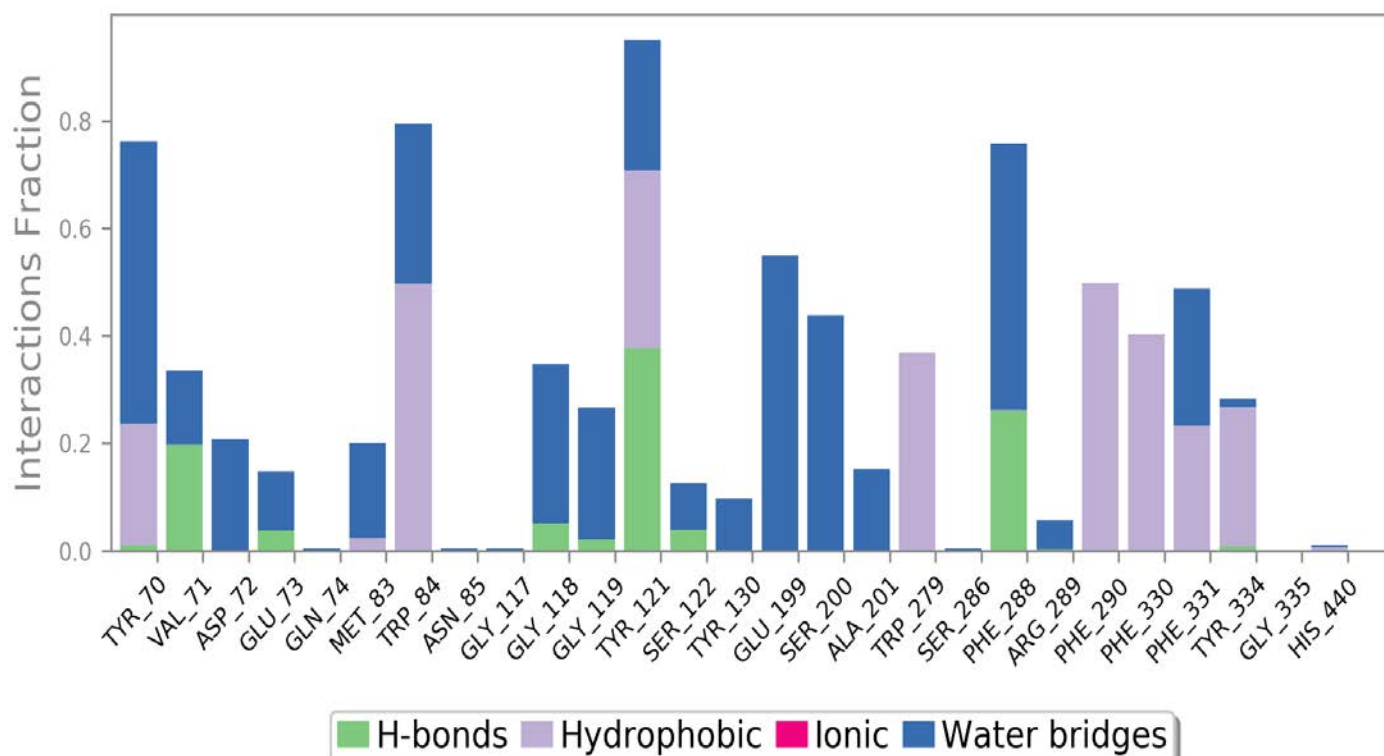

Protein interactions with the ligand can be monitored throughout the simulation. These interactions can be categorized by type and summarized, as shown in the plot above. Protein-ligand interactions (or 'contacts') are categorized into four types: Hydrogen Bonds, Hydrophobic, Ionic and Water Bridges. Each interaction type contains more specific subtypes, which can be explored through the 'Simulation Interactions Diagram' panel. The stacked bar charts are normalized over the course of the trajectory: for example, a value of 0.7 suggests that 70% of the simulation time the specific interaction is maintained. Values over 1.0 are possible as some protein residue may make multiple contacts of same subtype with the ligand.

**Hydrogen Bonds:** (H-bonds) play a significant role in ligand binding. Consideration of hydrogen-bonding properties in drug design is important because of their strong influence on drug specificity, metabolism and adsorption. Hydrogen bonds between a protein and a ligand can be further broken down into four subtypes: backbone acceptor; backbone donor; side-chain acceptor; side-chain donor.

The current geometric criteria for protein-ligand H-bond is: distance of 2.5 Å between the donor and acceptor atoms (D—H...A); a donor angle of  $\geq 120^\circ$  between the donor-hydrogen-acceptor atoms (D—H...A); and an acceptor angle of  $\geq 90^\circ$  between the hydrogen-acceptor-bonded\_atom atoms (H...A—X).

**Hydrophobic contacts:** fall into three subtypes:  $\pi$ -Cation;  $\pi$ - $\pi$ ; and Other, non-specific interactions. Generally these type of interactions involve a hydrophobic amino acid and an aromatic or aliphatic group on the ligand, but we have extended this category to also include  $\pi$ -Cation interactions.

The current geometric criteria for hydrophobic interactions is as follows:  $\pi$ -Cation — Aromatic and charged groups within 4.5 Å;  $\pi$ - $\pi$  — Two aromatic groups stacked face-to-face or face-to-edge; Other — A non-specific hydrophobic sidechain within 3.6 Å of a ligand's aromatic or aliphatic carbons.

**Ionic interactions:** or polar interactions, are between two oppositely charged atoms that are within 3.7 Å of each other and do not involve a hydrogen bond. We also monitor Protein-Metal-Ligand interactions, which are defined by a metal ion coordinated within 3.4 Å of protein's and ligand's heavy atoms (except carbon). All ionic interactions are broken down into two subtypes: those mediated by a protein backbone or side chains.

**Water Bridges:** are hydrogen-bonded protein-ligand interactions mediated by a water molecule. The hydrogen-bond geometry is slightly relaxed from the standard H-bond definition.

The current geometric criteria for a protein-water or water-ligand H-bond are: a distance of 2.8 Å between the donor and acceptor atoms (D—H...A); a donor angle of  $\geq 110^\circ$  between the donor-hydrogen-acceptor atoms (D—H...A); and an acceptor angle of  $\geq 90^\circ$  between the hydrogen-acceptor-bonded\_atom atoms (H...A—X).

## Protein-Ligand Contacts (cont.)

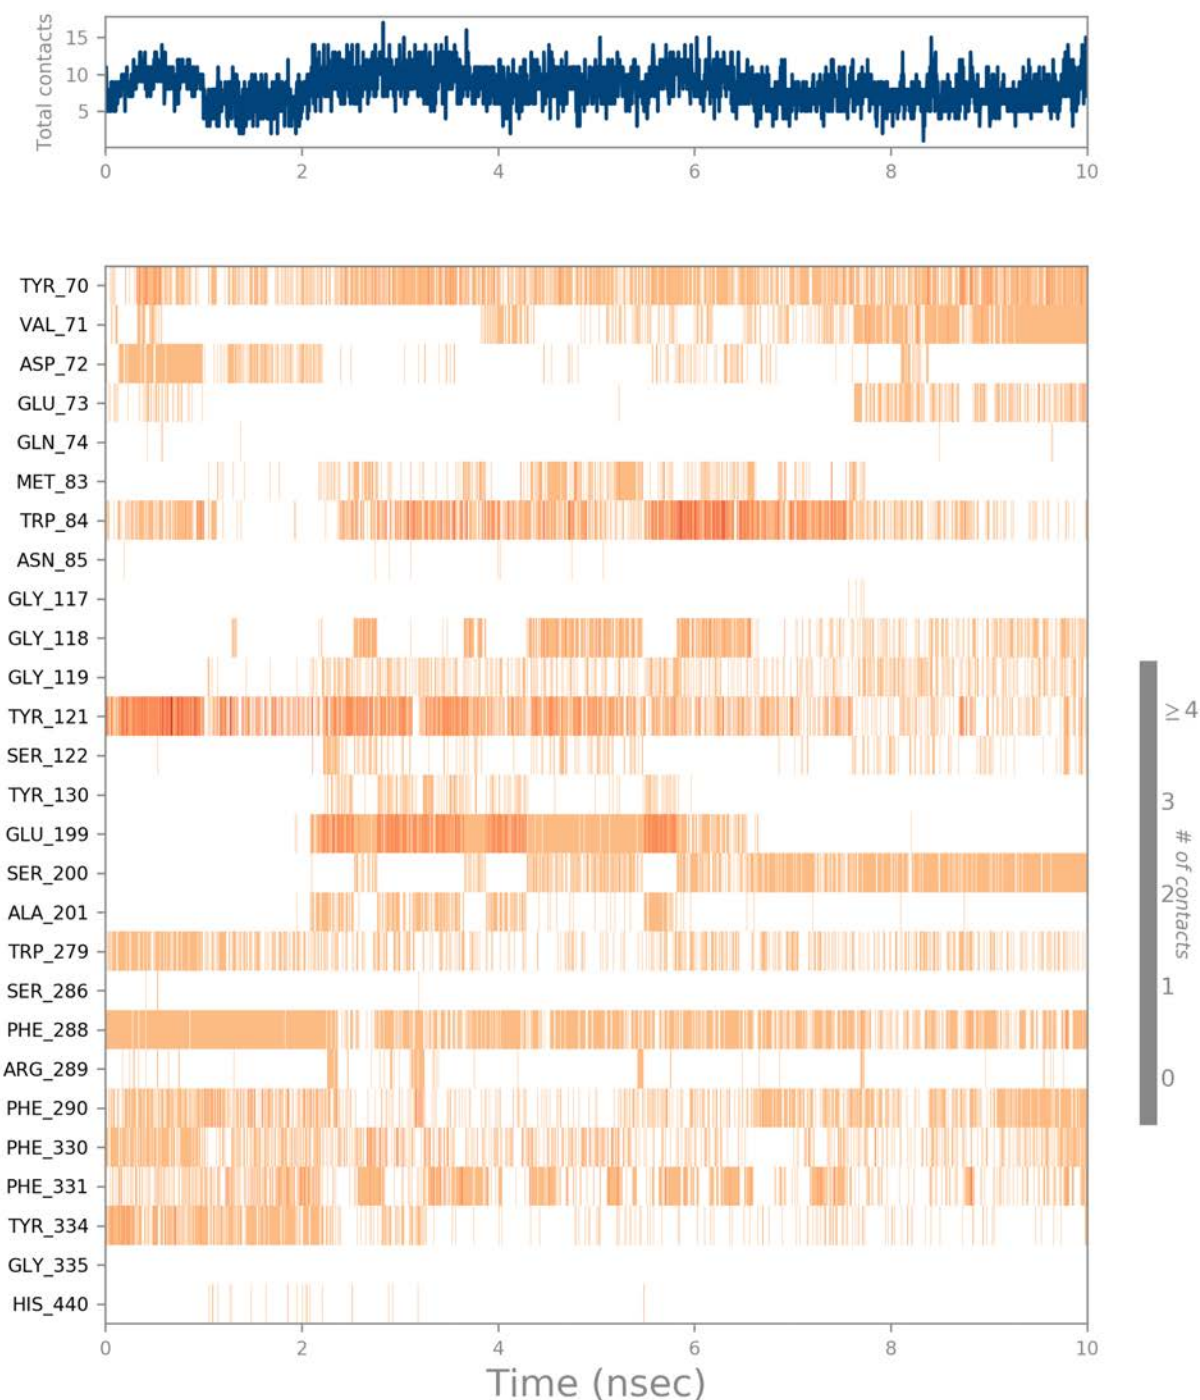

A timeline representation of the interactions and contacts (**H-bonds, Hydrophobic, Ionic, Water bridges**) summarized in the previous page. The top panel shows the total number of specific contacts the protein makes with the ligand over the course of the trajectory. The bottom panel shows which residues interact with the ligand in each trajectory frame. Some residues make more than one specific contact with the ligand, which is represented by a darker shade of orange, according to the scale to the right of the plot.

## Ligand-Protein Contacts

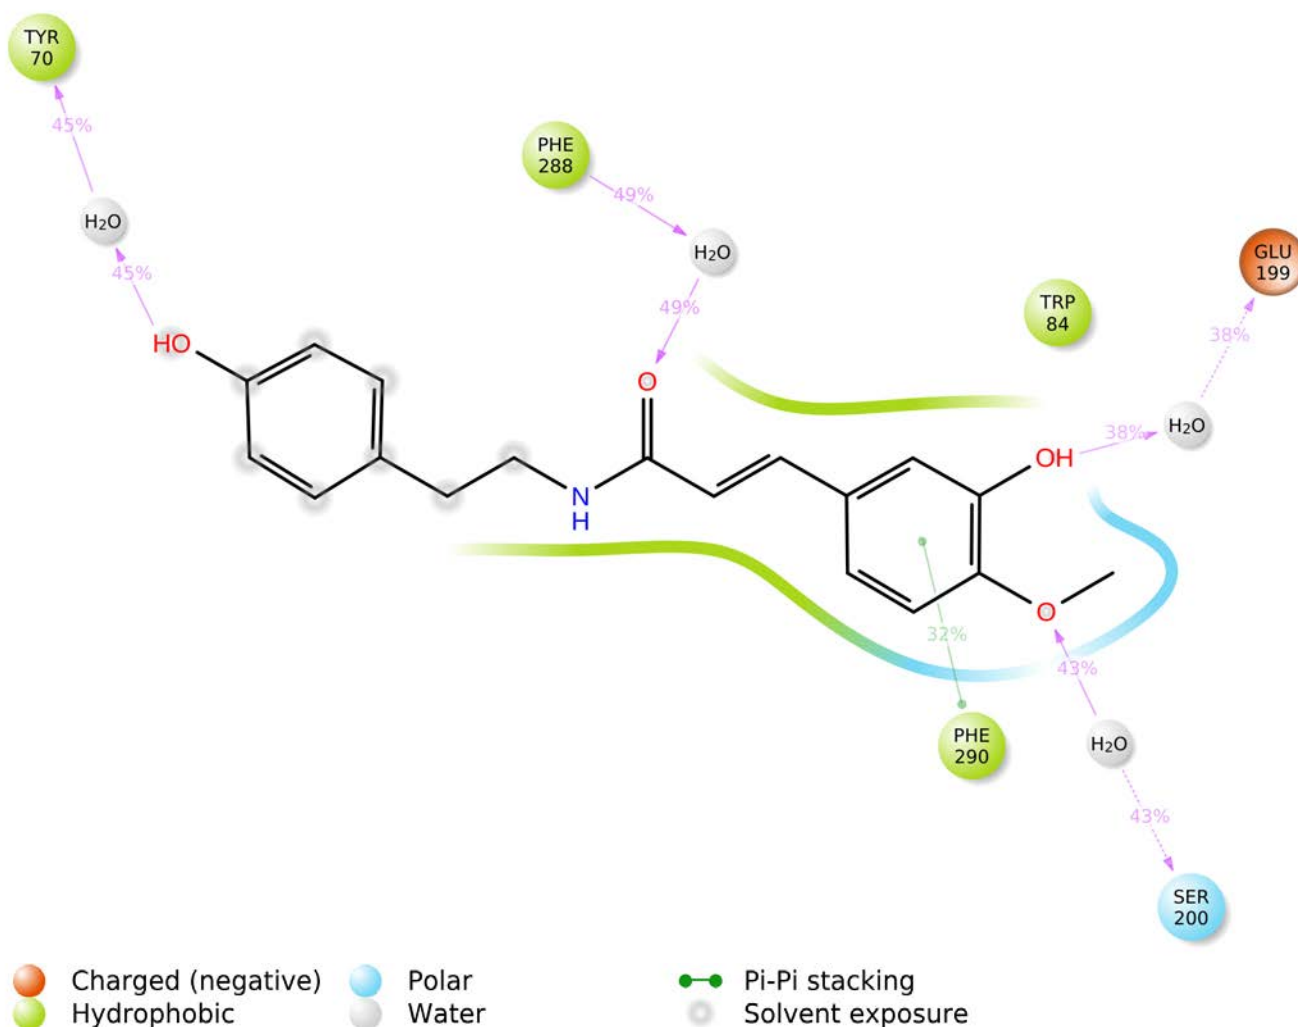

A schematic of detailed ligand atom interactions with the protein residues. Interactions that occur more than **30.0%** of the simulation time in the selected trajectory ( 0.00 through 10.00 nsec), are shown.

Note: it is possible to have interactions with >100% as some residues may have multiple interactions of a single type with the same ligand atom. For example, the ARG side chain has four H-bond donors that can all hydrogen-bond to a single H-bond acceptor.

## Ligand Torsion Profile

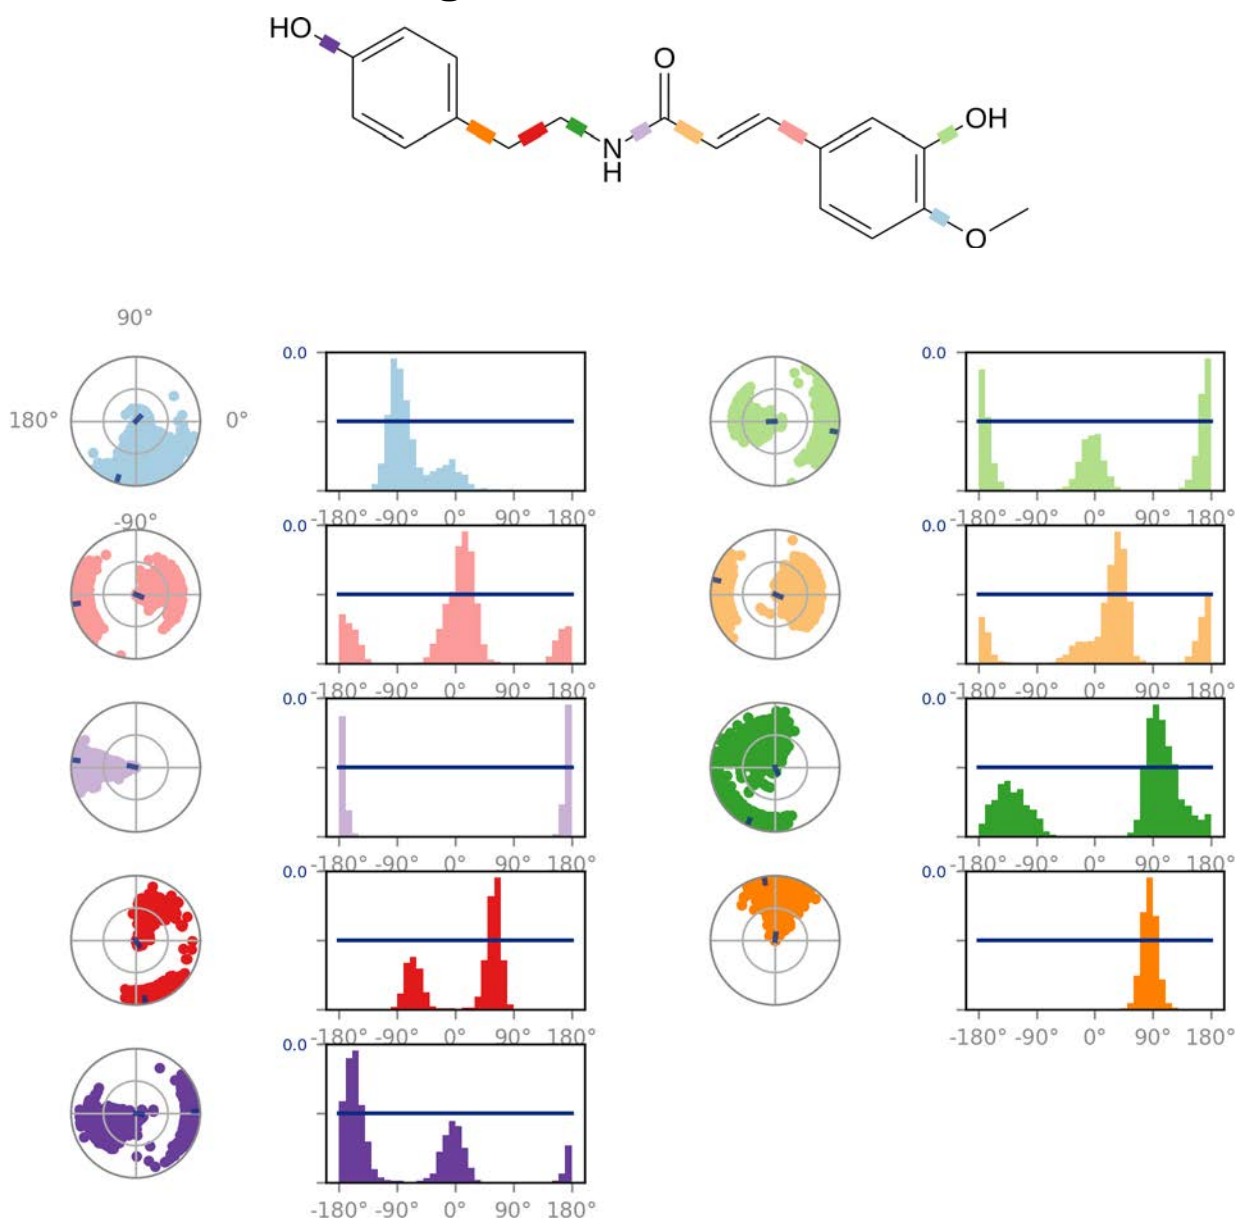

The ligand torsions plot summarizes the conformational evolution of every rotatable bond (RB) in the ligand throughout the simulation trajectory ( 0.00 through 10.00 nsec). The top panel shows the 2d schematic of a ligand with color-coded rotatable bonds. Each rotatable bond torsion is accompanied by a dial plot and bar plots of the same color.

Dial (or radial) plots describe the conformation of the torsion throughout the course of the simulation. The beginning of the simulation is in the center of the radial plot and the time evolution is plotted radially outwards.

The bar plots summarize the data on the dial plots, by showing the probability density of the torsion. If torsional potential information is available, the plot also shows the potential of the rotatable bond (by summing the potential of the related torsions). The values of the potential are on the left Y-axis of the chart, and are expressed in *kcal/mol*. Looking at the histogram and torsion potential relationships may give insights into the conformational strain the ligand undergoes to maintain a protein-bound conformation.



## Ligand Properties

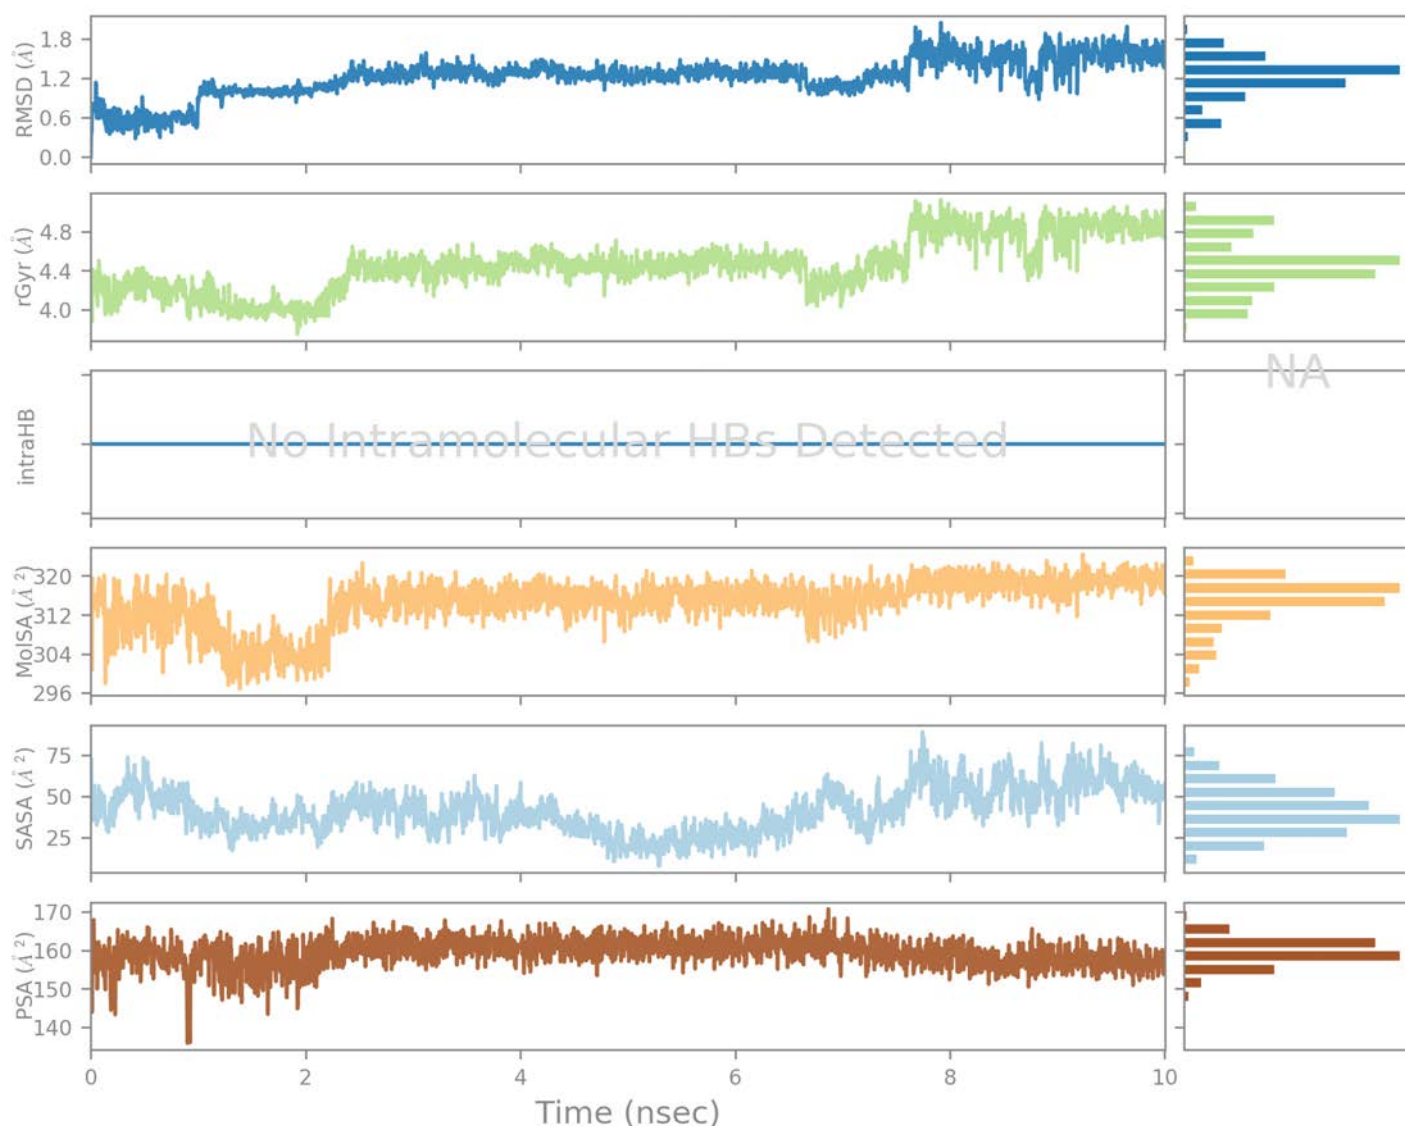

**Ligand RMSD:** Root mean square deviation of a ligand with respect to the reference conformation (typically the first frame is used as the reference and it is regarded as time  $t=0$ ).

**Radius of Gyration (rGyr):** Measures the 'extendedness' of a ligand, and is equivalent to its principal moment of inertia.

**Intramolecular Hydrogen Bonds (intraHB):** Number of internal hydrogen bonds (HB) within a ligand molecule.

**Molecular Surface Area (MolSA):** Molecular surface calculation with 1.4 Å probe radius. This value is equivalent to a van der Waals surface area.

**Solvent Accessible Surface Area (SASA):** Surface area of a molecule accessible by a water molecule.

**Polar Surface Area (PSA):** Solvent accessible surface area in a molecule contributed only by oxygen and nitrogen atoms.

## Report S7

# MD Simulation Report on BChE - Neostigmine Interactions

### Simulation Details

Jobname: md\_BChE\_NEO\_XXX

Entry title: 6EP4 - preprocessed NEO\_from\_MD - preprocessed NEO\_from\_LigPrep - preprocessed

| CPU # | Job Type | Ensemble | Temp. [K] | Sim. Time [ns] | # Atoms | # Waters | Charge |
|-------|----------|----------|-----------|----------------|---------|----------|--------|
| 1     | mdsim    | NPT      | 300.0     | 10.006         | 48097   | 13242    | 0      |

### Protein Information

|     | Tot. Residues | Prot. Chain(s) | Res. in Chain(s)  | # Atoms | # Heavy Atoms | Charge |     |     |     |     |     |     |     |     |     |    |
|-----|---------------|----------------|-------------------|---------|---------------|--------|-----|-----|-----|-----|-----|-----|-----|-----|-----|----|
|     | 523           | 'A'            | ict_values([523]) | 8258    | 4171          | +4     |     |     |     |     |     |     |     |     |     |    |
| - A | 3             | 5              | 10                | 15      | 20            | 25     | 30  | 35  | 40  | 45  | 50  | 55  | 60  | 65  | 70  | 72 |
| SSA |               |                |                   |         |               |        |     |     |     |     |     |     |     |     |     |    |
| - A | 73            | 75             | 80                | 85      | 90            | 95     | 100 | 105 | 110 | 115 | 120 | 125 | 130 | 135 | 142 |    |
| SSA |               |                |                   |         |               |        |     |     |     |     |     |     |     |     |     |    |
| - A | 143           | 145            | 150               | 155     | 160           | 165    | 170 | 175 | 180 | 185 | 190 | 195 | 200 | 205 | 212 |    |
| SSA |               |                |                   |         |               |        |     |     |     |     |     |     |     |     |     |    |
| - A | 213           | 215            | 220               | 225     | 230           | 235    | 240 | 245 | 250 | 255 | 260 | 265 | 270 | 275 | 282 |    |
| SSA |               |                |                   |         |               |        |     |     |     |     |     |     |     |     |     |    |
| - A | 283           | 285            | 290               | 295     | 300           | 305    | 310 | 315 | 320 | 325 | 330 | 335 | 340 | 345 | 352 |    |
| SSA |               |                |                   |         |               |        |     |     |     |     |     |     |     |     |     |    |
| - A | 353           | 355            | 360               | 365     | 370           | 375    | 385 | 390 | 395 | 400 | 405 | 410 | 415 | 420 | 426 |    |
| SSA |               |                |                   |         |               |        |     |     |     |     |     |     |     |     |     |    |
| - A | 427           | 430            | 435               | 440     | 445           | 450    | 455 | 460 | 465 | 470 | 475 | 480 | 485 | 490 | 496 |    |
| SSA |               |                |                   |         |               |        |     |     |     |     |     |     |     |     |     |    |
| - A | 497           | 500            | 505               | 510     | 515           | 520    | 525 | 529 |     |     |     |     |     |     |     |    |
| SSA |               |                |                   |         |               |        |     |     |     |     |     |     |     |     |     |    |

### Ligand Information

|                    |                               |
|--------------------|-------------------------------|
| SMILES             | CN(C)C(=O)Oc1cccc1[N+](C)(C)C |
| PDB Name           | 'UNK'                         |
| Num. of Atoms      | 34 (total) 16 (heavy)         |
| Atomic Mass        | 224.285 au                    |
| Charge             | +1                            |
| Mol. Formula       | C11H18N3O2                    |
| Num. of Fragments  | 5                             |
| Num. of Rot. Bonds | 4                             |

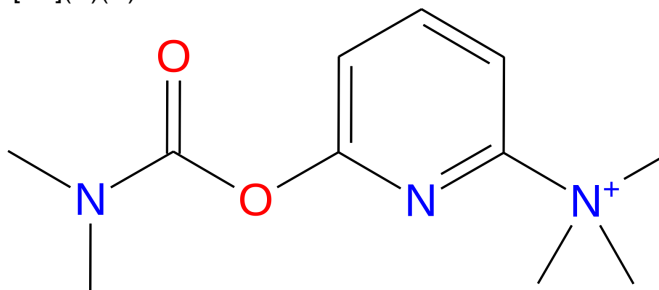

### Counter Ion/Salt Information

| Type | Num. | Concentration [mM] | Total Charge |
|------|------|--------------------|--------------|
| Cl   | 42   | 57.668             | -42          |
| Na   | 37   | 50.803             | +37          |

## Protein-Ligand RMSD

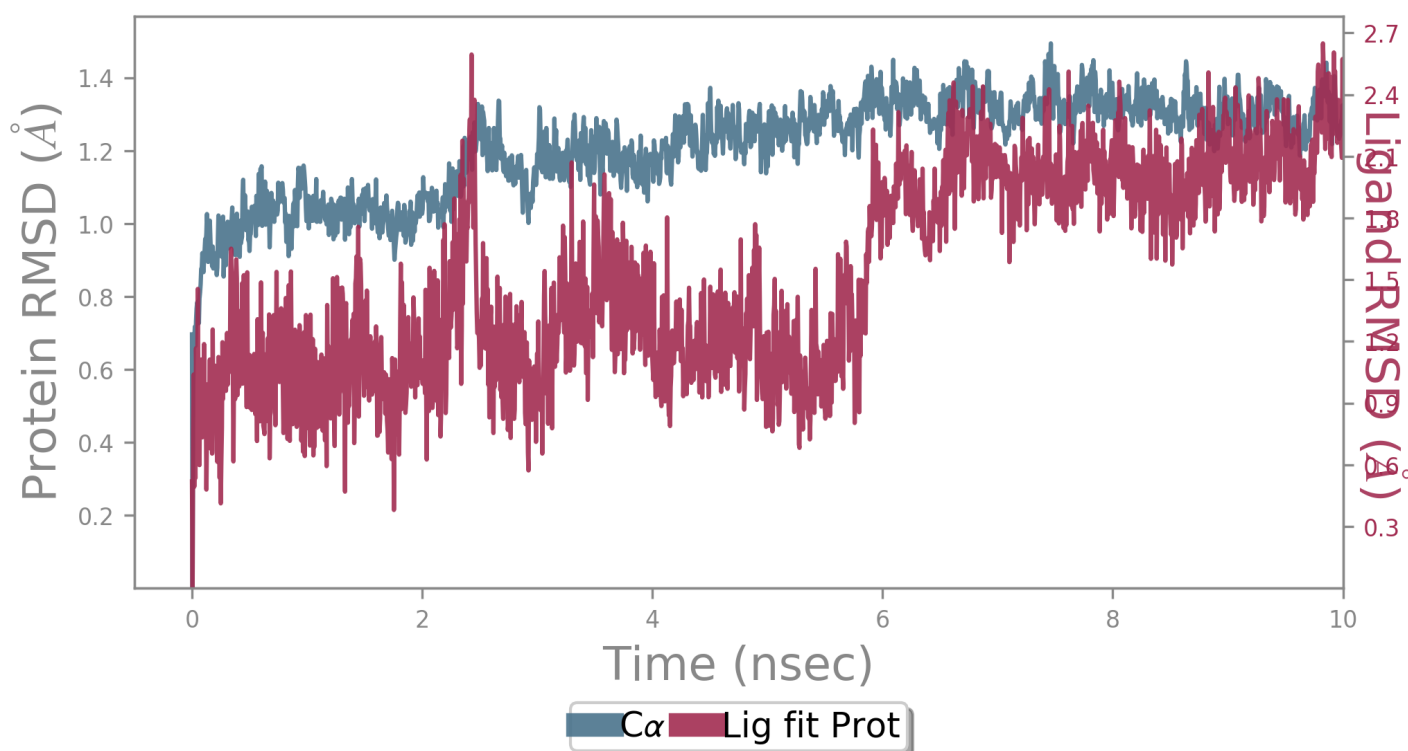

The Root Mean Square Deviation (RMSD) is used to measure the average change in displacement of a selection of atoms for a particular frame with respect to a reference frame. It is calculated for all frames in the trajectory. The RMSD for frame  $x$  is:

$$RMSD_x = \sqrt{\frac{1}{N} \sum_{i=1}^N (r'_i(t_x) - r_i(t_{ref}))^2}$$

where  $N$  is the number of atoms in the atom selection;  $t_{ref}$  is the reference time, (typically the first frame is used as the reference and it is regarded as time  $t=0$ ); and  $r'$  is the position of the selected atoms in frame  $x$  after superimposing on the reference frame, where frame  $x$  is recorded at time  $t_x$ . The procedure is repeated for every frame in the simulation trajectory.

**Protein RMSD:** The above plot shows the RMSD evolution of a protein (left Y-axis). All protein frames are first aligned on the reference frame backbone, and then the RMSD is calculated based on the atom selection. Monitoring the RMSD of the protein can give insights into its structural conformation throughout the simulation. RMSD analysis can indicate if the simulation has equilibrated — its fluctuations towards the end of the simulation are around some thermal average structure. Changes of the order of 1-3 Å are perfectly acceptable for small, globular proteins. Changes much larger than that, however, indicate that the protein is undergoing a large conformational change during the simulation. It is also important that your simulation converges — the RMSD values stabilize around a fixed value. If the RMSD of the protein is still increasing or decreasing on average at the end of the simulation, then your system has not equilibrated, and your simulation may not be long enough for rigorous analysis.

**Ligand RMSD:** Ligand RMSD (right Y-axis) indicates how stable the ligand is with respect to the protein and its binding pocket. In the above plot, 'Lig fit Prot' shows the RMSD of a ligand when the protein-ligand complex is first aligned on the protein backbone of the reference and then the RMSD of the ligand heavy atoms is measured. If the values observed are significantly larger than the RMSD of the protein, then it is likely that the ligand has diffused away from its initial binding site.



## Protein RMSF

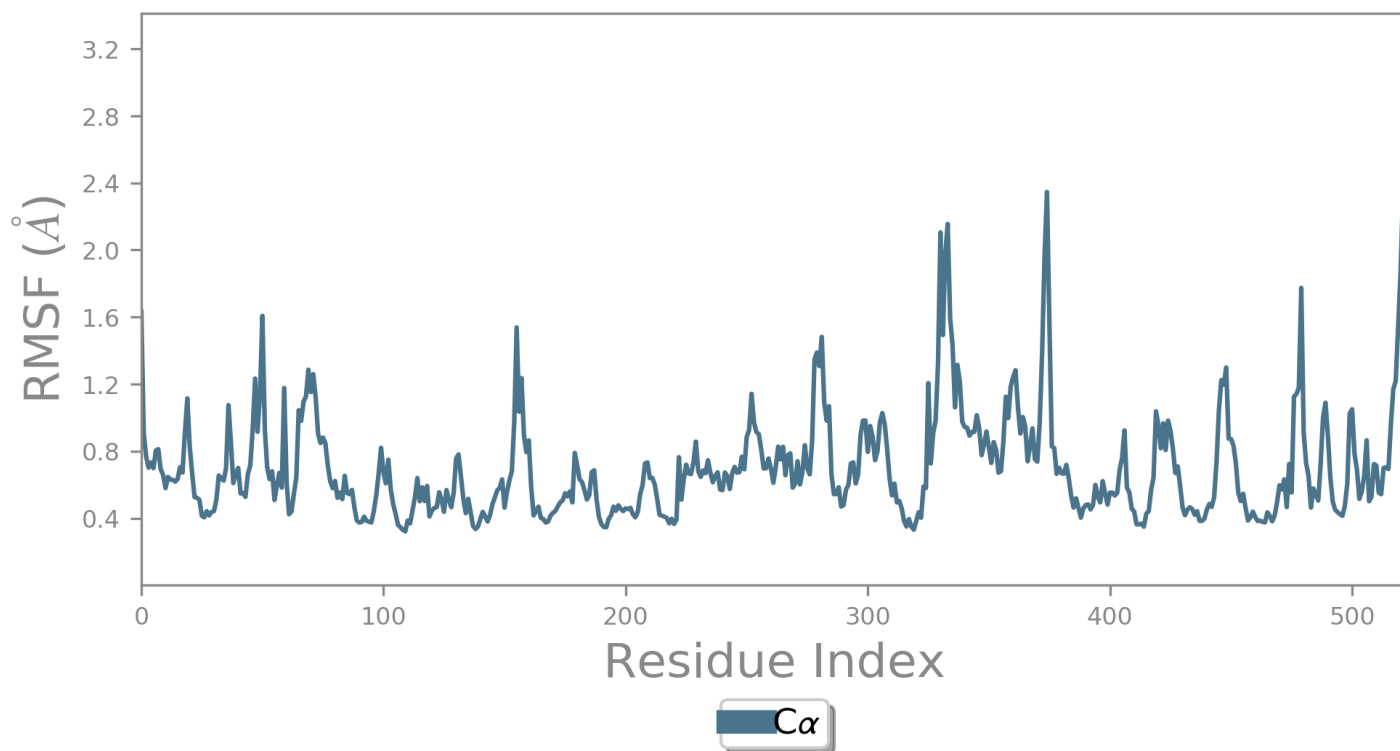

The Root Mean Square Fluctuation (RMSF) is useful for characterizing local changes along the protein chain. The RMSF for residue  $i$  is:

$$RMSF_i = \sqrt{\frac{1}{T} \sum_{t=1}^T \langle (r'_i(t)) - r_i(t_{ref})^2 \rangle}$$

where  $T$  is the trajectory time over which the RMSF is calculated,  $t_{ref}$  is the reference time,  $r_i$  is the position of residue  $i$ ;  $r'$  is the position of atoms in residue  $i$  after superposition on the reference, and the angle brackets indicate that the average of the square distance is taken over the selection of atoms in the residue.

On this plot, peaks indicate areas of the protein that fluctuate the most during the simulation. Typically you will observe that the tails ( $N$ - and  $C$ -terminal) fluctuate more than any other part of the protein. Secondary structure elements like alpha helices and beta strands are usually more rigid than the unstructured part of the protein, and thus fluctuate less than the loop regions.

## Protein Secondary Structure

% Helix  
29.32

% Strand  
12.71

% Total SSE  
42.04

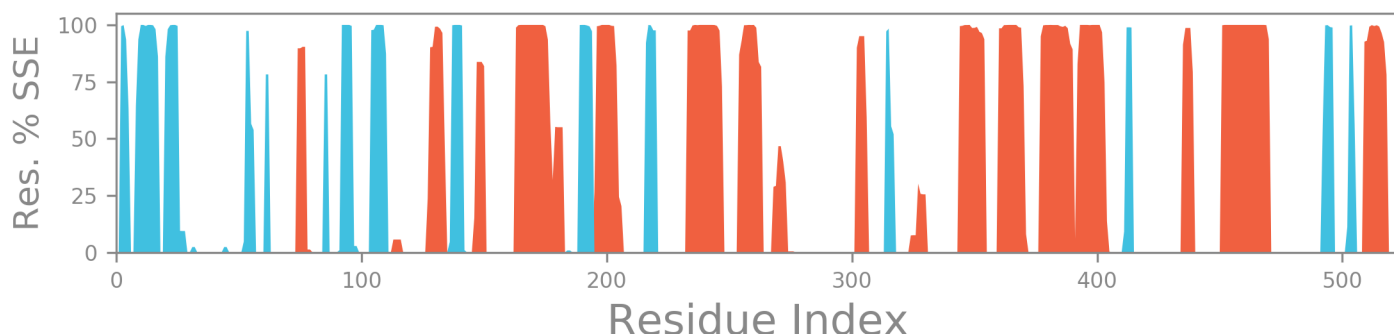

Protein secondary structure elements (SSE) like **alpha-helices** and **beta-strands** are monitored throughout the simulation. The plot above reports SSE distribution by residue index throughout the protein structure. The plot below summarizes the SSE composition for each trajectory frame over the course of the simulation, and the plot at the bottom monitors each residue and its SSE assignment over time.

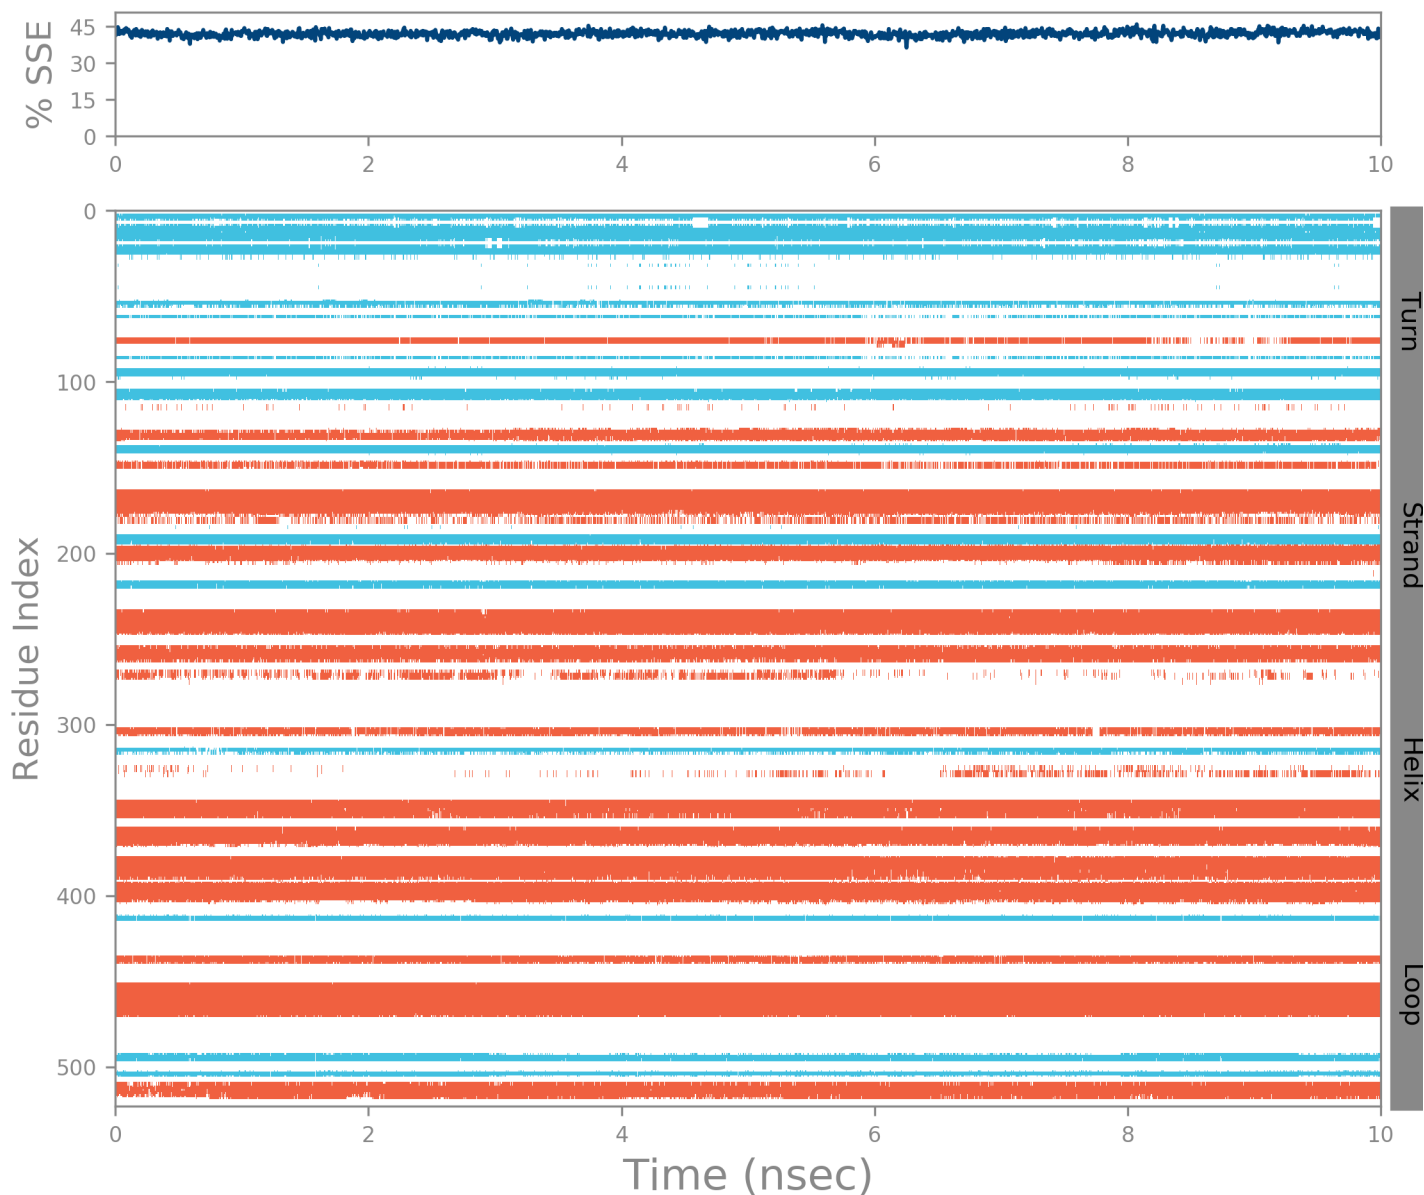

## Neostigmine Ligand RMSF

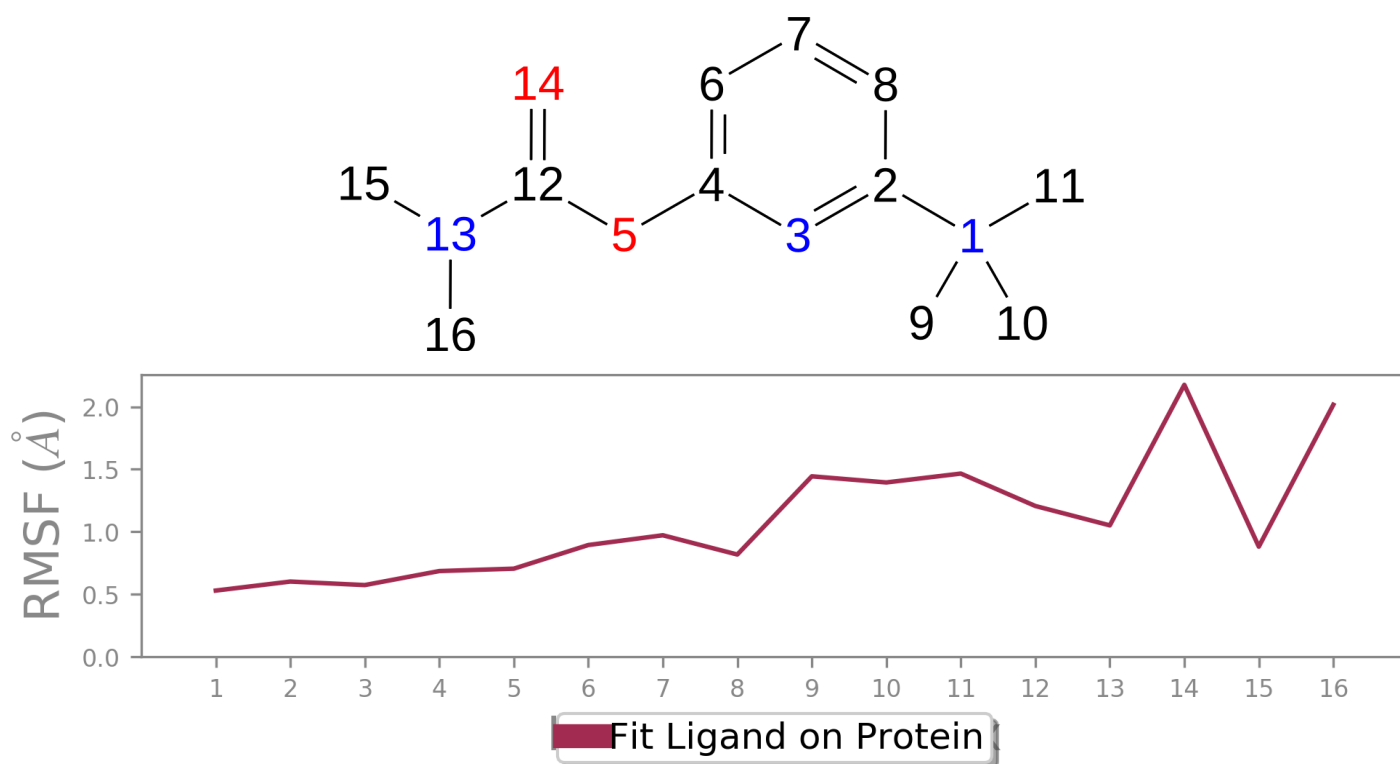

The Ligand Root Mean Square Fluctuation (L-RMSF) is useful for characterizing changes in the ligand atom positions. The RMSF for atom  $i$  is:

$$RMSF_i = \sqrt{\frac{1}{T} \sum_{t=1}^T (r'_i(t) - r_i(t_{ref}))^2}$$

where  $T$  is the trajectory time over which the RMSF is calculated,  $t_{ref}$  is the reference time (usually for the first frame, and is regarded as the zero of time);  $r$  is the position of atom  $i$  in the reference at time  $t_{ref}$  and  $r'$  is the position of atom  $i$  at time  $t$  after superposition on the reference frame.

Ligand RMSF shows the ligand's fluctuations broken down by atom, corresponding to the 2D structure in the top panel. The ligand RMSF may give you insights on how ligand fragments interact with the protein and their entropic role in the binding event. In the bottom panel, the 'Fit Ligand on Protein' line shows the ligand fluctuations, with respect to the protein. The protein-ligand complex is first aligned on the protein backbone and then the ligand RMSF is measured on the ligand heavy atoms.

## Protein-Ligand Contacts

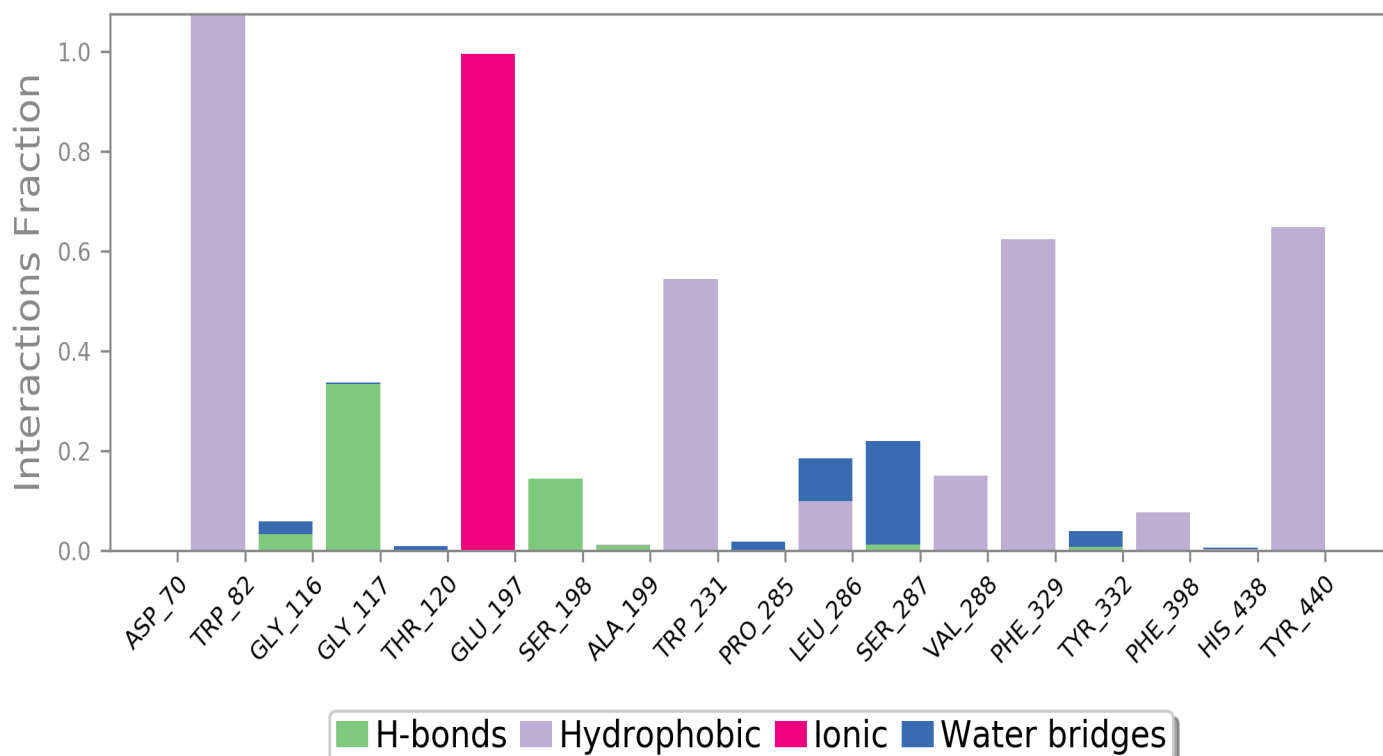

Protein interactions with the ligand can be monitored throughout the simulation. These interactions can be categorized by type and summarized, as shown in the plot above. Protein-ligand interactions (or 'contacts') are categorized into four types: Hydrogen Bonds, Hydrophobic, Ionic and Water Bridges. Each interaction type contains more specific subtypes, which can be explored through the 'Simulation Interactions Diagram' panel. The stacked bar charts are normalized over the course of the trajectory: for example, a value of 0.7 suggests that 70% of the simulation time the specific interaction is maintained. Values over 1.0 are possible as some protein residue may make multiple contacts of same subtype with the ligand.

**Hydrogen Bonds:** (H-bonds) play a significant role in ligand binding. Consideration of hydrogen-bonding properties in drug design is important because of their strong influence on drug specificity, metabolism and adsorption. Hydrogen bonds between a protein and a ligand can be further broken down into four subtypes: backbone acceptor; backbone donor; side-chain acceptor; side-chain donor.

The current geometric criteria for protein-ligand H-bond is: distance of 2.5 Å between the donor and acceptor atoms (D—H...A); a donor angle of  $\geq 120^\circ$  between the donor-hydrogen-acceptor atoms (D—H...A); and an acceptor angle of  $\geq 90^\circ$  between the hydrogen-acceptor-bonded\_atom atoms (H...A—X).

**Hydrophobic contacts:** fall into three subtypes:  $\pi$ -Cation;  $\pi$ - $\pi$ ; and Other, non-specific interactions. Generally these type of interactions involve a hydrophobic amino acid and an aromatic or aliphatic group on the ligand, but we have extended this category to also include  $\pi$ -Cation interactions.

The current geometric criteria for hydrophobic interactions is as follows:  $\pi$ -Cation — Aromatic and charged groups within 4.5 Å;  $\pi$ - $\pi$  — Two aromatic groups stacked face-to-face or face-to-edge; Other — A non-specific hydrophobic sidechain within 3.6 Å of a ligand's aromatic or aliphatic carbons.

**Ionic interactions:** or polar interactions, are between two oppositely charged atoms that are within 3.7 Å of each other and do not involve a hydrogen bond. We also monitor Protein-Metal-Ligand interactions, which are defined by a metal ion coordinated within 3.4 Å of protein's and ligand's heavy atoms (except carbon). All ionic interactions are broken down into two subtypes: those mediated by a protein backbone or side chains.

**Water Bridges:** are hydrogen-bonded protein-ligand interactions mediated by a water molecule. The hydrogen-bond geometry is slightly relaxed from the standard H-bond definition.

The current geometric criteria for a protein-water or water-ligand H-bond are: a distance of 2.8 Å between the donor and acceptor atoms (D—H...A); a donor angle of  $\geq 110^\circ$  between the donor-hydrogen-acceptor atoms (D—H...A); and an acceptor angle of  $\geq 90^\circ$  between the hydrogen-acceptor-bonded\_atom atoms (H...A—X).

## Protein-Ligand Contacts (cont.)

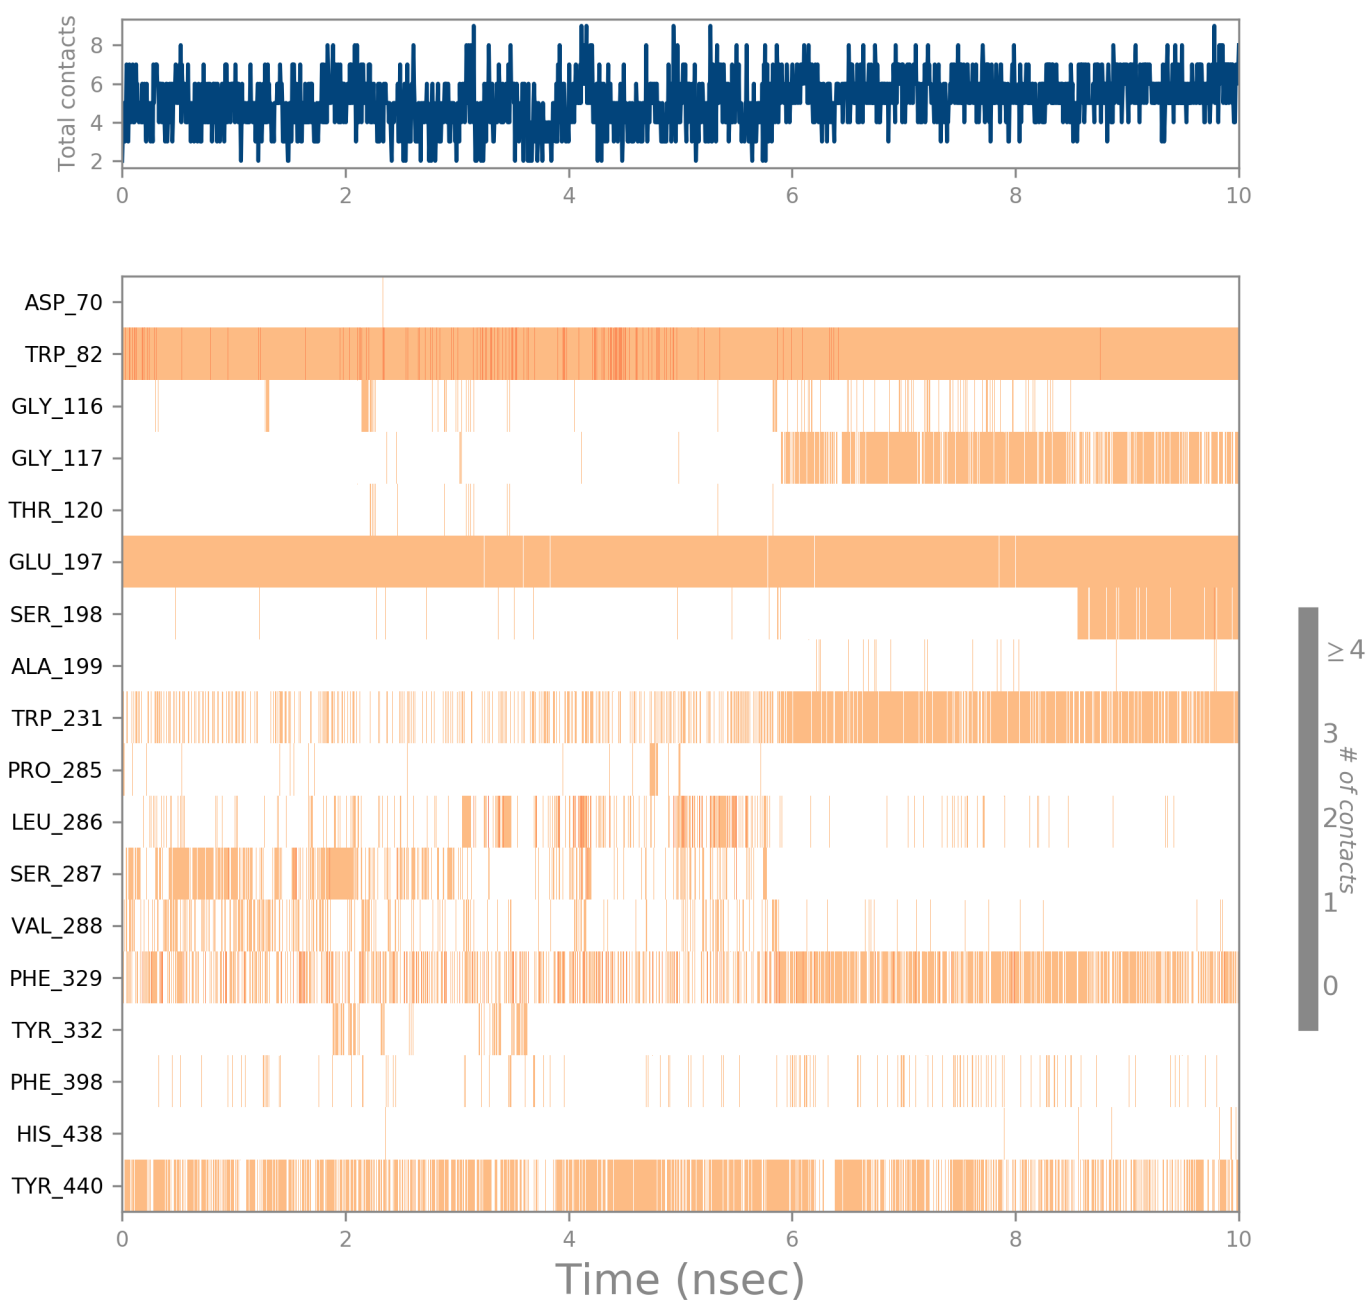

A timeline representation of the interactions and contacts (**H-bonds, Hydrophobic, Ionic, Water bridges**) summarized in the previous page. The top panel shows the total number of specific contacts the protein makes with the ligand over the course of the trajectory. The bottom panel shows which residues interact with the ligand in each trajectory frame. Some residues make more than one specific contact with the ligand, which is represented by a darker shade of orange, according to the scale to the right of the plot.

## Ligand-Protein Contacts

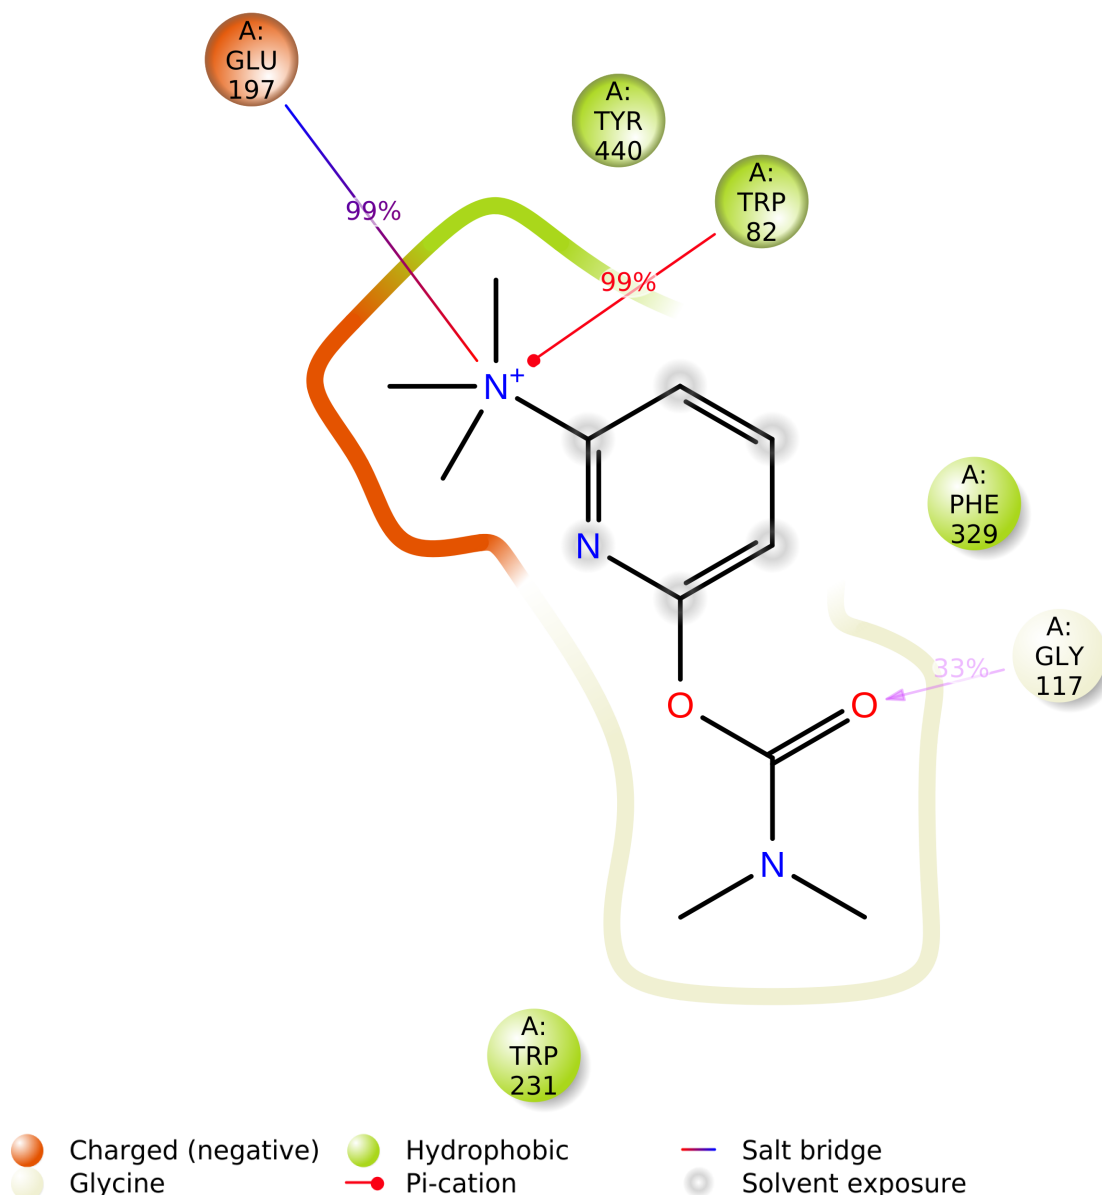

A schematic of detailed ligand atom interactions with the protein residues. Interactions that occur more than **30.0%** of the simulation time in the selected trajectory ( 0.00 through 10.00 nsec), are shown.

Note: it is possible to have interactions with >100% as some residues may have multiple interactions of a single type with the same ligand atom. For example, the ARG side chain has four H-bond donors that can all hydrogen-bond to a single H-bond acceptor.

## Ligand Torsion Profile

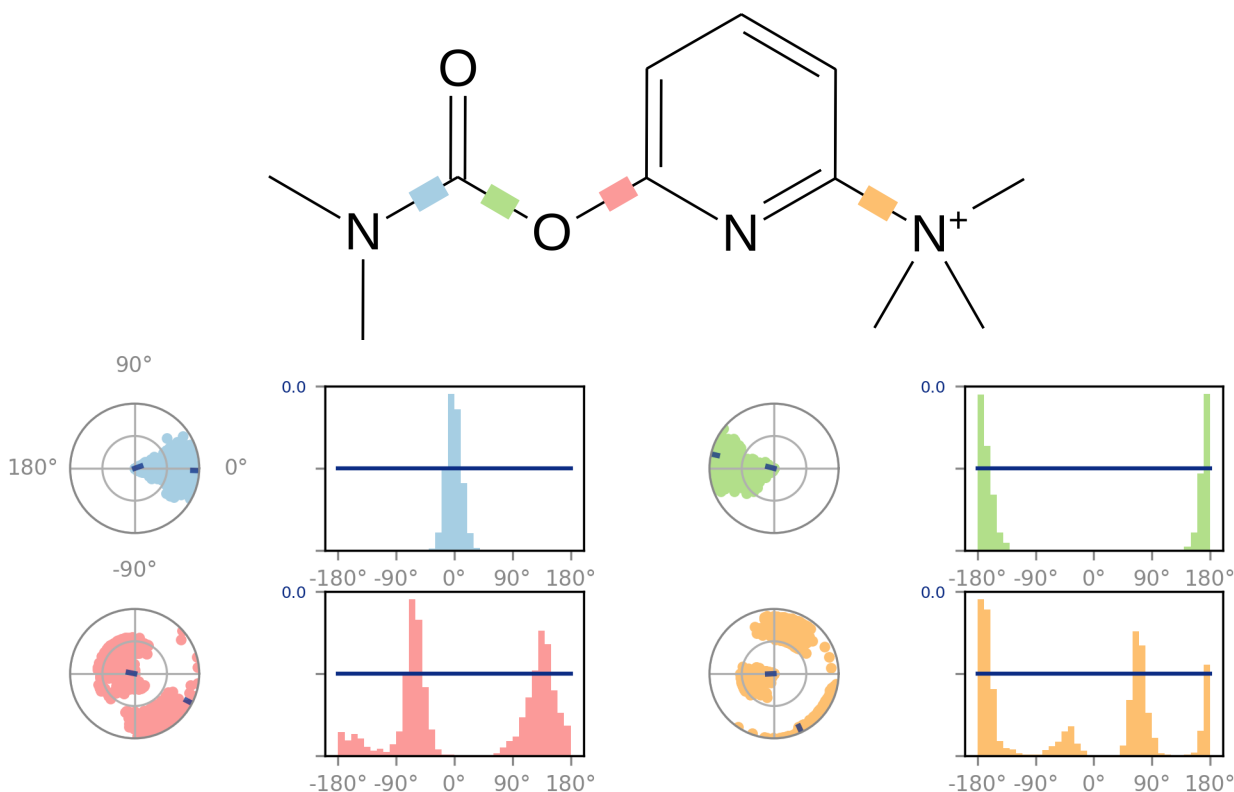

The ligand torsions plot summarizes the conformational evolution of every rotatable bond (RB) in the ligand throughout the simulation trajectory ( 0.00 through 10.00 nsec). The top panel shows the 2d schematic of a ligand with color-coded rotatable bonds. Each rotatable bond torsion is accompanied by a dial plot and bar plots of the same color.

Dial (or radial) plots describe the conformation of the torsion throughout the course of the simulation. The beginning of the simulation is in the center of the radial plot and the time evolution is plotted radially outwards.

The bar plots summarize the data on the dial plots, by showing the probability density of the torsion. If torsional potential information is available, the plot also shows the potential of the rotatable bond (by summing the potential of the related torsions). The values of the potential are on the left Y-axis of the chart, and are expressed in *kcal/mol*. Looking at the histogram and torsion potential relationships may give insights into the conformational strain the ligand undergoes to maintain a protein-bound conformation.

## Ligand Properties

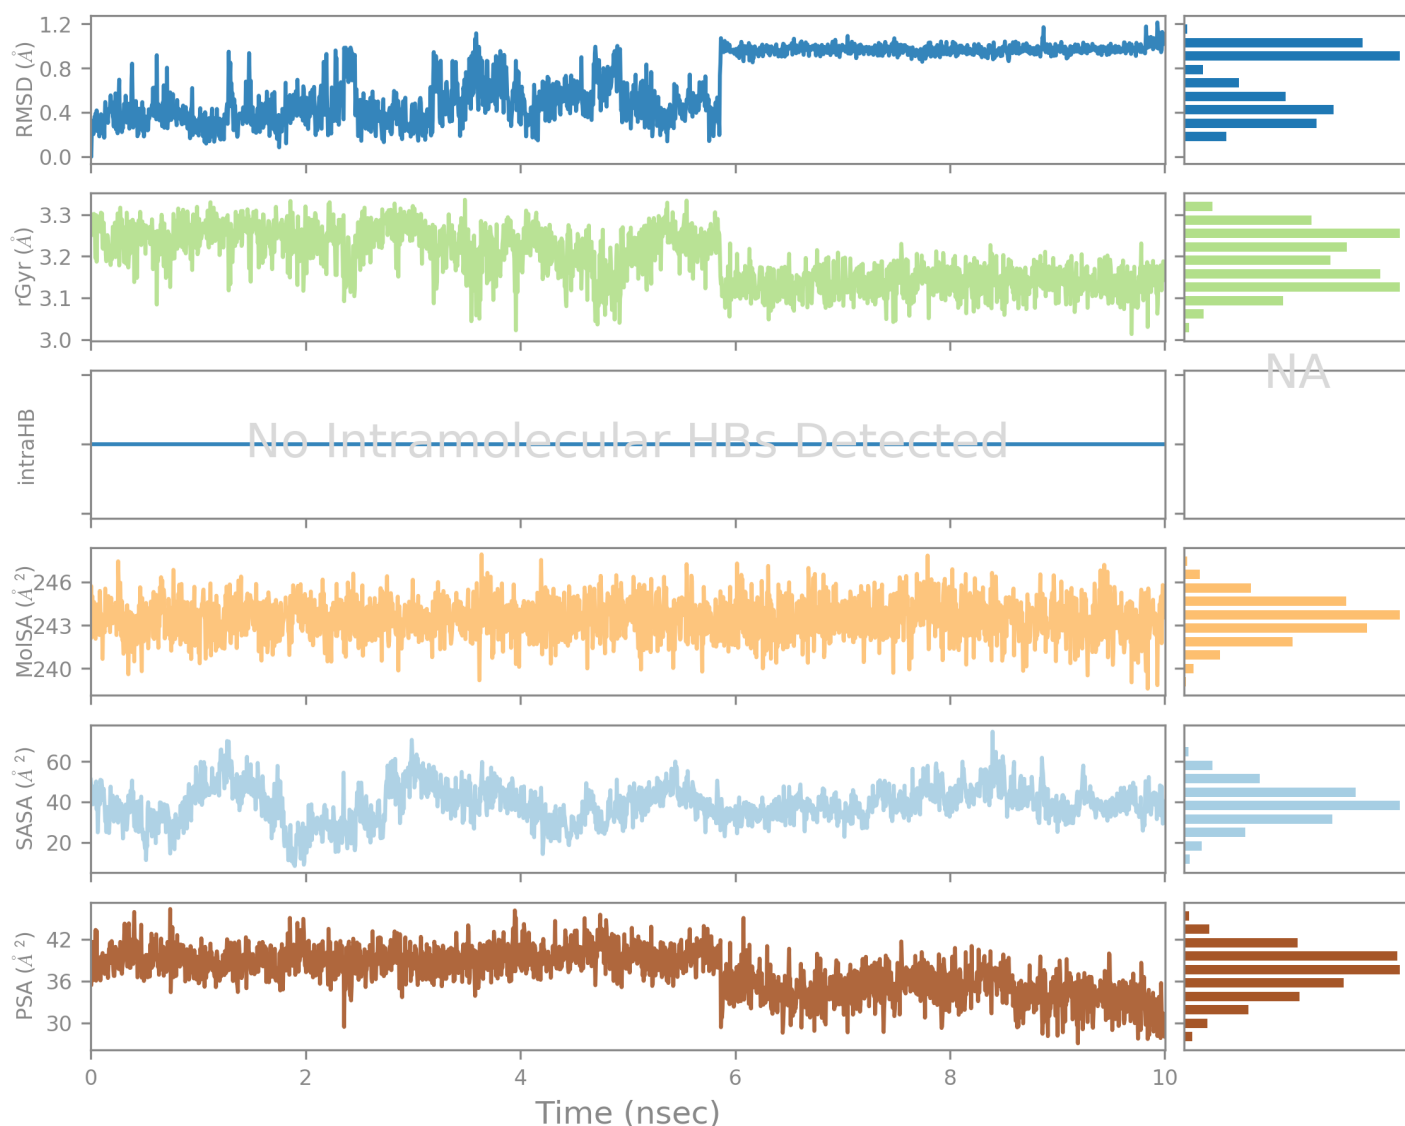

**Ligand RMSD:** Root mean square deviation of a ligand with respect to the reference conformation (typically the first frame is used as the reference and it is regarded as time  $t=0$ ).

**Radius of Gyration (rGyr):** Measures the 'extendedness' of a ligand, and is equivalent to its principal moment of inertia.

**Intramolecular Hydrogen Bonds (intraHB):** Number of internal hydrogen bonds (HB) within a ligand molecule.

**Molecular Surface Area (MolSA):** Molecular surface calculation with 1.4 Å probe radius. This value is equivalent to a van der Waals surface area.

**Solvent Accessible Surface Area (SASA):** Surface area of a molecule accessible by a water molecule.

**Polar Surface Area (PSA):** Solvent accessible surface area in a molecule contributed only by oxygen and nitrogen atoms.



## Report S8

# MD Simulation Report on BChE - Lindoldhamine Isomer Interactions

### Simulation Details

Jobname: md\_job\_6EP4\_1\_dock-1  
Entry title: 6EP4\_1\_dock\_1

| CPU # | Job Type | Ensemble | Temp. [K] | Sim. Time [ns] | # Atoms | # Waters | Charge |
|-------|----------|----------|-----------|----------------|---------|----------|--------|
| 1     | mdsim    | NPT      | 300.0     | 10.005         | 50973   | 14166    | 0      |

### Protein Information

| Tot. Residues | Prot. Chain(s) | Res. in Chain(s)  | # Atoms | # Heavy Atoms | Charge |
|---------------|----------------|-------------------|---------|---------------|--------|
| 527           | 'NoChainId'    | ict_values([527]) | 8313    | 4203          | +2     |

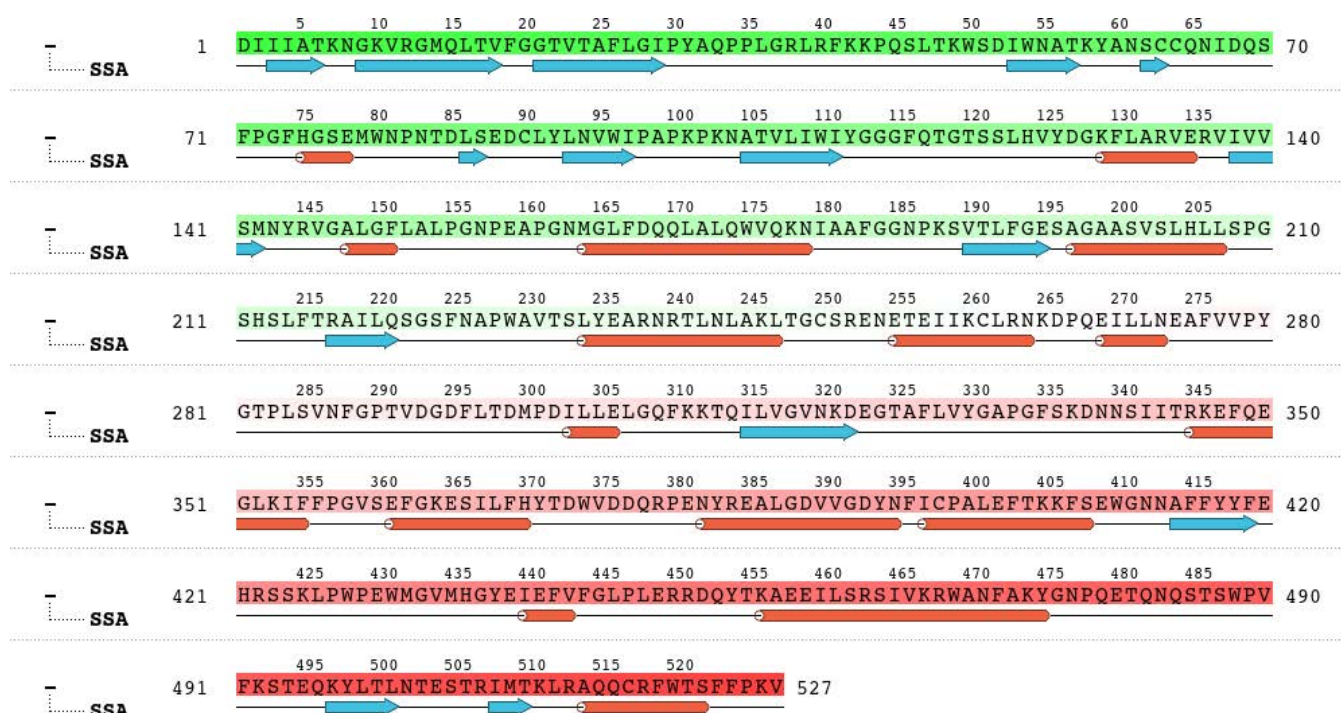

### Ligand Information

|                    |                                                                                            |
|--------------------|--------------------------------------------------------------------------------------------|
| SMILES             | COc(c(c1)O)cc(c12)CC[NH2+][C@H]2Cc3cc(c(O)cc3)Oc(c4)c(OC)cc(c45)CC[NH2+][C@H]5Cc6ccc(O)cc6 |
| PDB Name           | 'UNK'                                                                                      |
| Num. of Atoms      | 80 (total) 42 (heavy)                                                                      |
| Atomic Mass        | 570.692 au                                                                                 |
| Charge             | +2                                                                                         |
| Mol. Formula       | C34H38N2O6                                                                                 |
| Num. of Fragments  | 3                                                                                          |
| Num. of Rot. Bonds | 11                                                                                         |

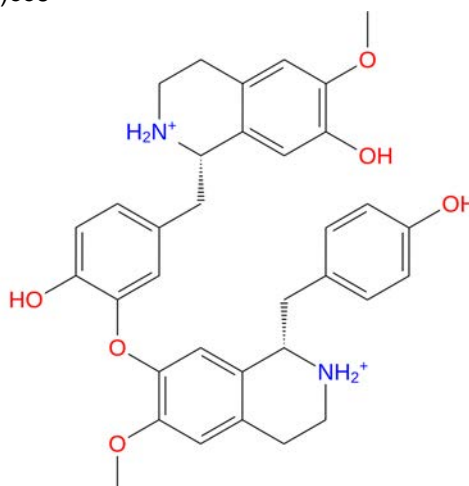

### Counter Ion/Salt Information

| Type | Num. | Concentration [mM] | Total Charge |
|------|------|--------------------|--------------|
| Cl   | 43   | 55.190             | -43          |
| Na   | 39   | 50.056             | +39          |

## Protein-Ligand RMSD

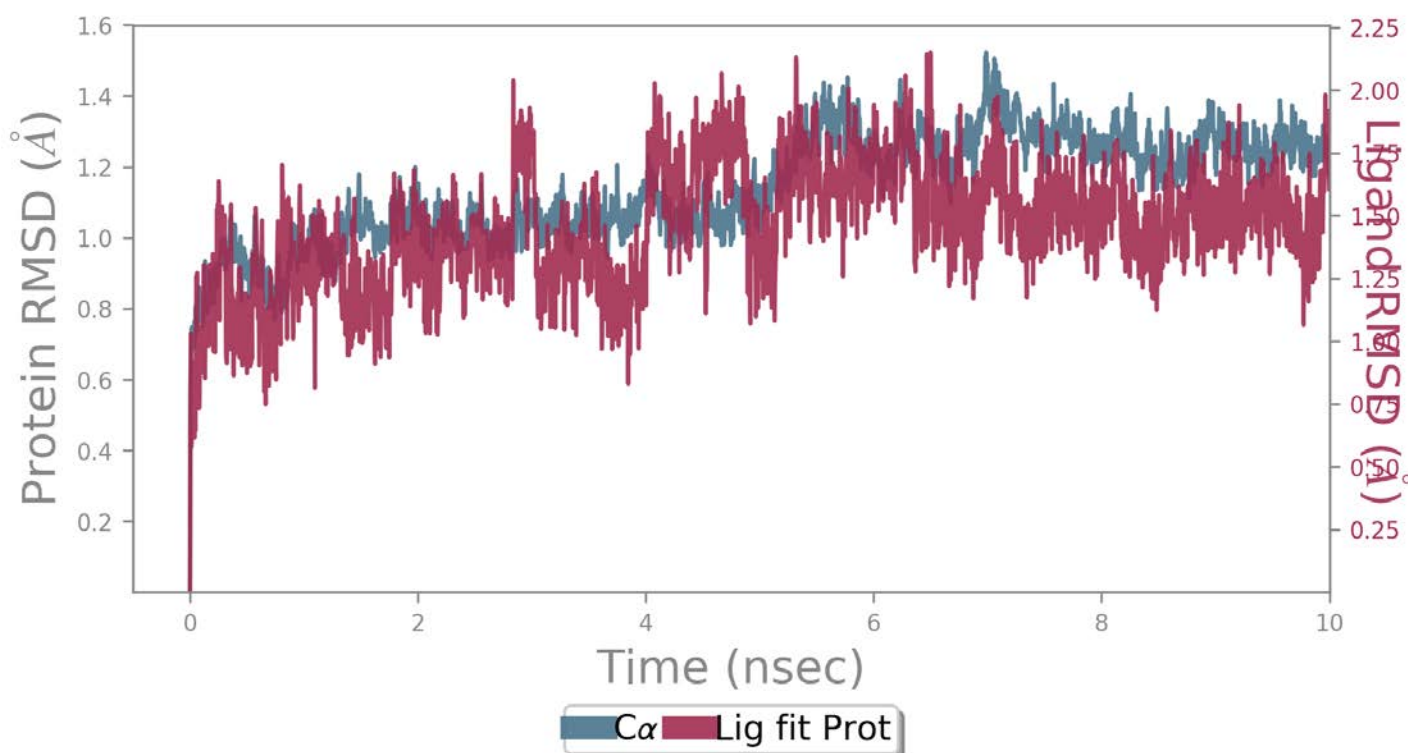

The Root Mean Square Deviation (RMSD) is used to measure the average change in displacement of a selection of atoms for a particular frame with respect to a reference frame. It is calculated for all frames in the trajectory. The RMSD for frame  $x$  is:

$$RMSD_x = \sqrt{\frac{1}{N} \sum_{i=1}^N (r'_i(t_x) - r_i(t_{ref}))^2}$$

where  $N$  is the number of atoms in the atom selection;  $t_{ref}$  is the reference time, (typically the first frame is used as the reference and it is regarded as time  $t=0$ ); and  $r'$  is the position of the selected atoms in frame  $x$  after superimposing on the reference frame, where frame  $x$  is recorded at time  $t_x$ . The procedure is repeated for every frame in the simulation trajectory.

**Protein RMSD:** The above plot shows the RMSD evolution of a protein (left Y-axis). All protein frames are first aligned on the reference frame backbone, and then the RMSD is calculated based on the atom selection. Monitoring the RMSD of the protein can give insights into its structural conformation throughout the simulation. RMSD analysis can indicate if the simulation has equilibrated — its fluctuations towards the end of the simulation are around some thermal average structure. Changes of the order of 1-3 Å are perfectly acceptable for small, globular proteins. Changes much larger than that, however, indicate that the protein is undergoing a large conformational change during the simulation. It is also important that your simulation converges — the RMSD values stabilize around a fixed value. If the RMSD of the protein is still increasing or decreasing on average at the end of the simulation, then your system has not equilibrated, and your simulation may not be long enough for rigorous analysis.

**Ligand RMSD:** Ligand RMSD (right Y-axis) indicates how stable the ligand is with respect to the protein and its binding pocket. In the above plot, 'Lig fit Prot' shows the RMSD of a ligand when the protein-ligand complex is first aligned on the protein backbone of the reference and then the RMSD of the ligand heavy atoms is measured. If the values observed are significantly larger than the RMSD of the protein, then it is likely that the ligand has diffused away from its initial binding site.

## Protein RMSF

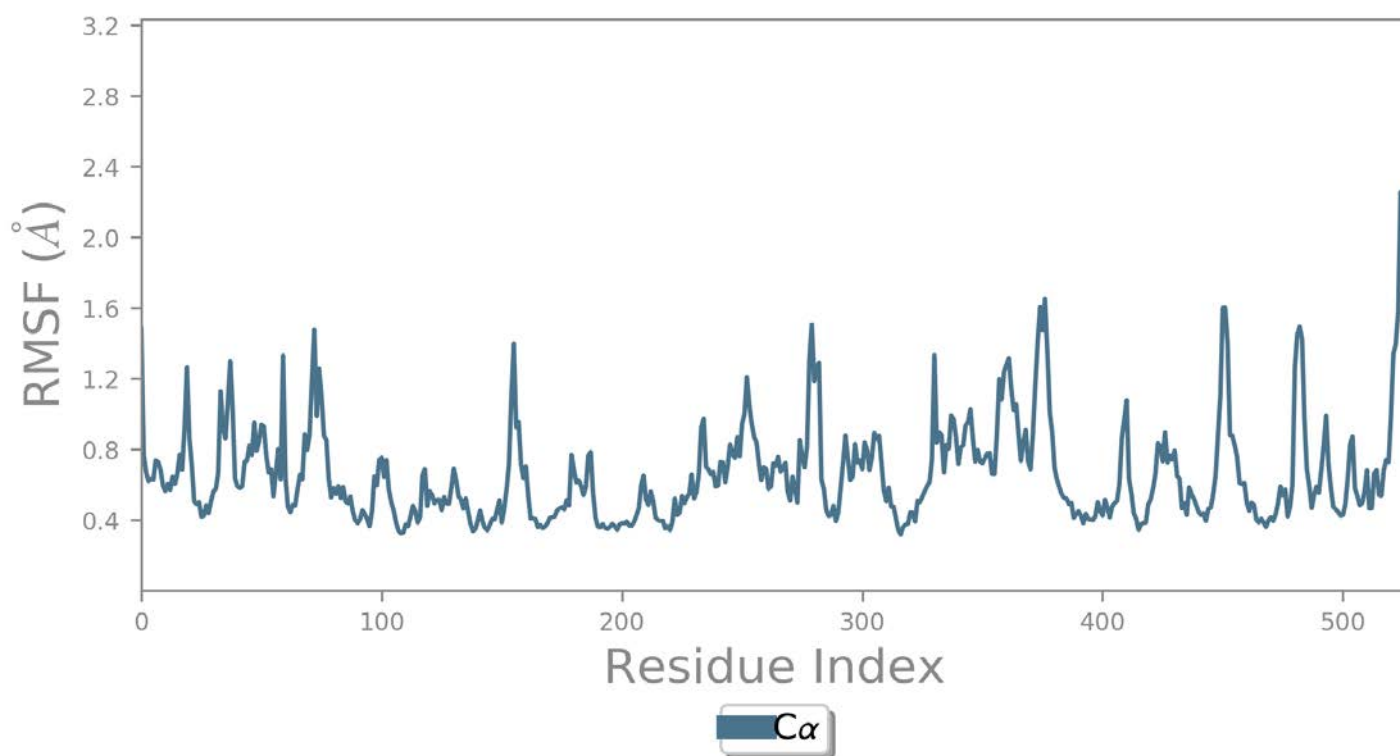

The Root Mean Square Fluctuation (RMSF) is useful for characterizing local changes along the protein chain. The RMSF for residue  $i$  is:

$$RMSF_i = \sqrt{\frac{1}{T} \sum_{t=1}^T \langle (r'_i(t)) - r_i(t_{ref})^2 \rangle}$$

where  $T$  is the trajectory time over which the RMSF is calculated,  $t_{ref}$  is the reference time,  $r_i$  is the position of residue  $i$ ;  $r'$  is the position of atoms in residue  $i$  after superposition on the reference, and the angle brackets indicate that the average of the square distance is taken over the selection of atoms in the residue.

On this plot, peaks indicate areas of the protein that fluctuate the most during the simulation. Typically you will observe that the tails ( $N$ - and  $C$ -terminal) fluctuate more than any other part of the protein. Secondary structure elements like alpha helices and beta strands are usually more rigid than the unstructured part of the protein, and thus fluctuate less than the loop regions.



## Protein Secondary Structure

% Helix  
28.64

% Strand  
13.79

% Total SSE  
42.43

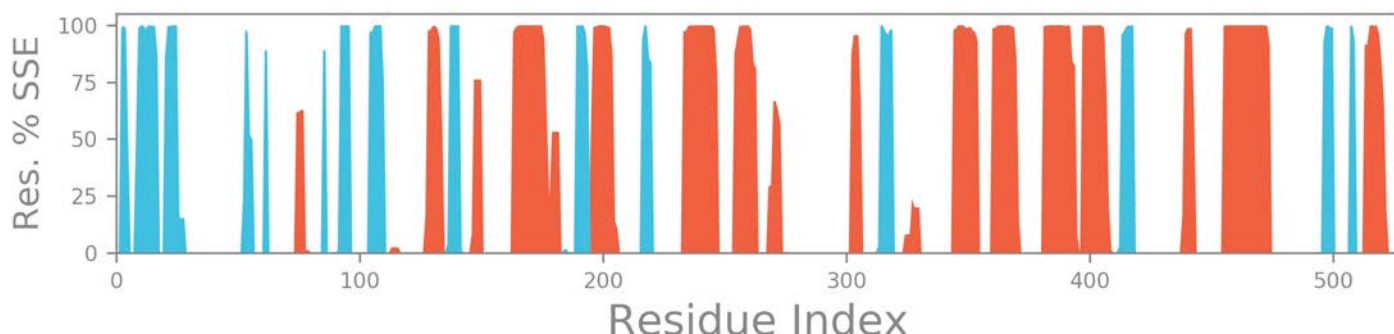

Protein secondary structure elements (SSE) like **alpha-helices** and **beta-strands** are monitored throughout the simulation. The plot above reports SSE distribution by residue index throughout the protein structure. The plot below summarizes the SSE composition for each trajectory frame over the course of the simulation, and the plot at the bottom monitors each residue and its SSE assignment over time.

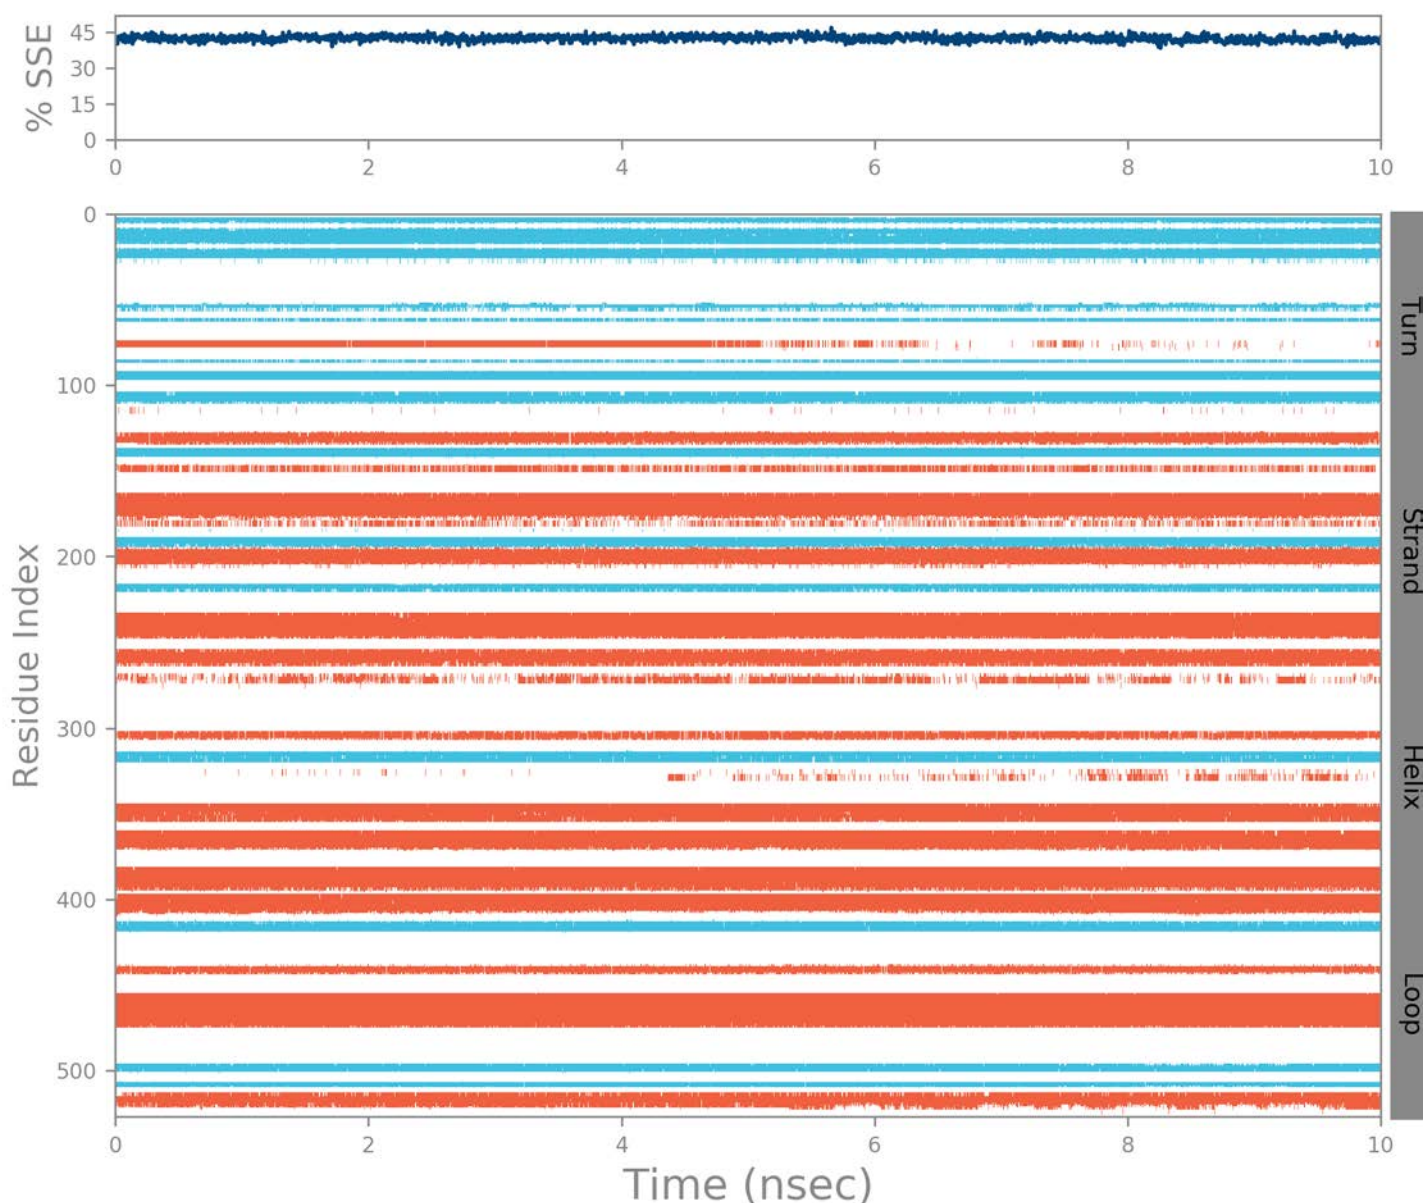

## RMSF of Lindholdamine Isomer Ligand

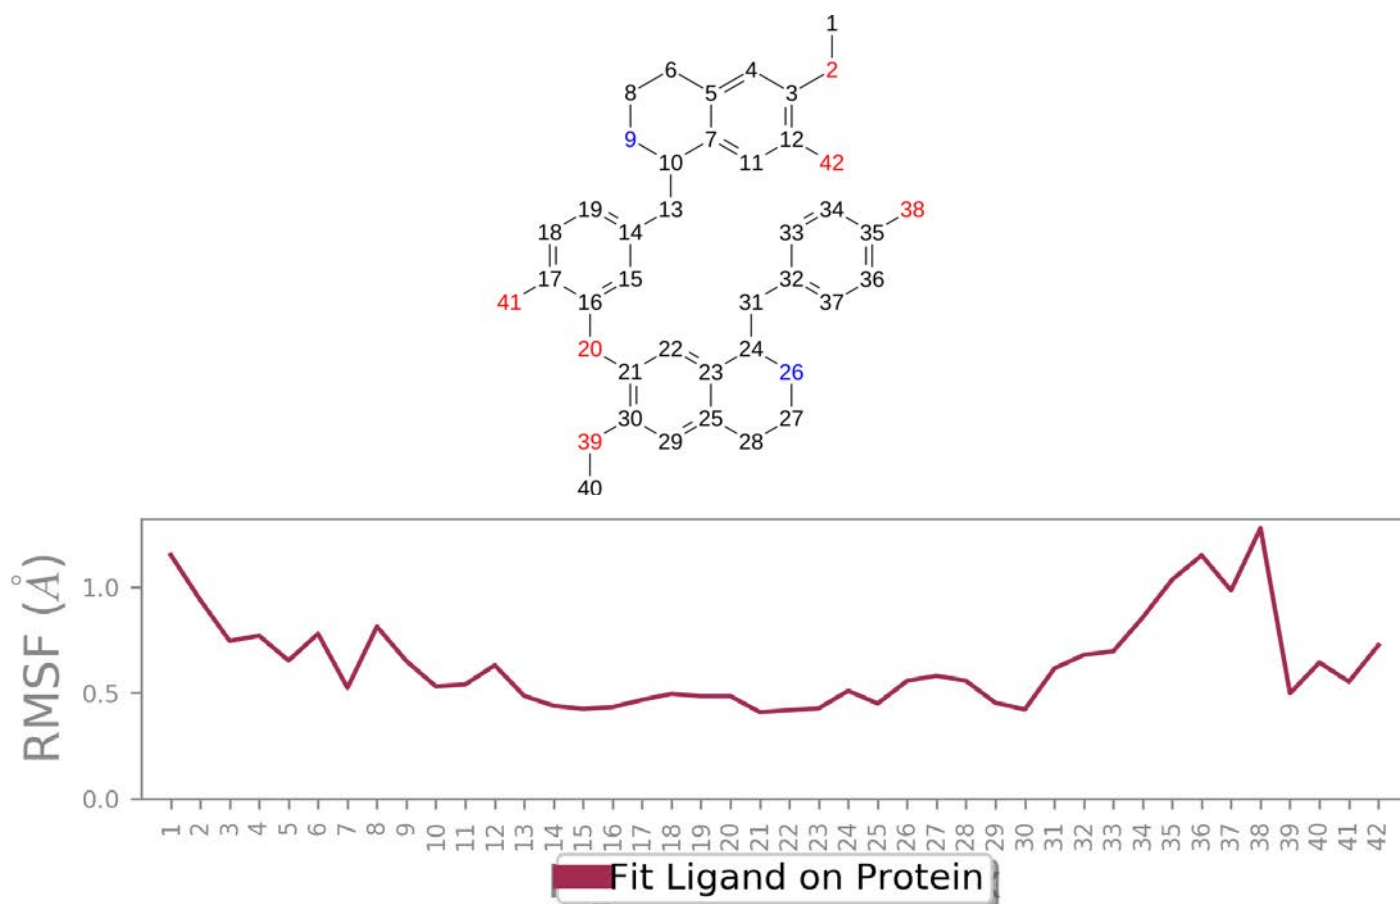

The Ligand Root Mean Square Fluctuation (L-RMSF) is useful for characterizing changes in the ligand atom positions. The RMSF for atom  $i$  is:

$$RMSF_i = \sqrt{\frac{1}{T} \sum_{t=1}^T (r'_i(t) - r_i(t_{ref}))^2}$$

where  $T$  is the trajectory time over which the RMSF is calculated,  $t_{ref}$  is the reference time (usually for the first frame, and is regarded as the zero of time);  $r$  is the position of atom  $i$  in the reference at time  $t_{ref}$  and  $r'$  is the position of atom  $i$  at time  $t$  after superposition on the reference frame.

Ligand RMSF shows the ligand's fluctuations broken down by atom, corresponding to the 2D structure in the top panel. The ligand RMSF may give you insights on how ligand fragments interact with the protein and their entropic role in the binding event. In the bottom panel, the 'Fit Ligand on Protein' line shows the ligand fluctuations, with respect to the protein. The protein-ligand complex is first aligned on the protein backbone and then the ligand RMSF is measured on the ligand heavy atoms.

## Protein-Ligand Contacts

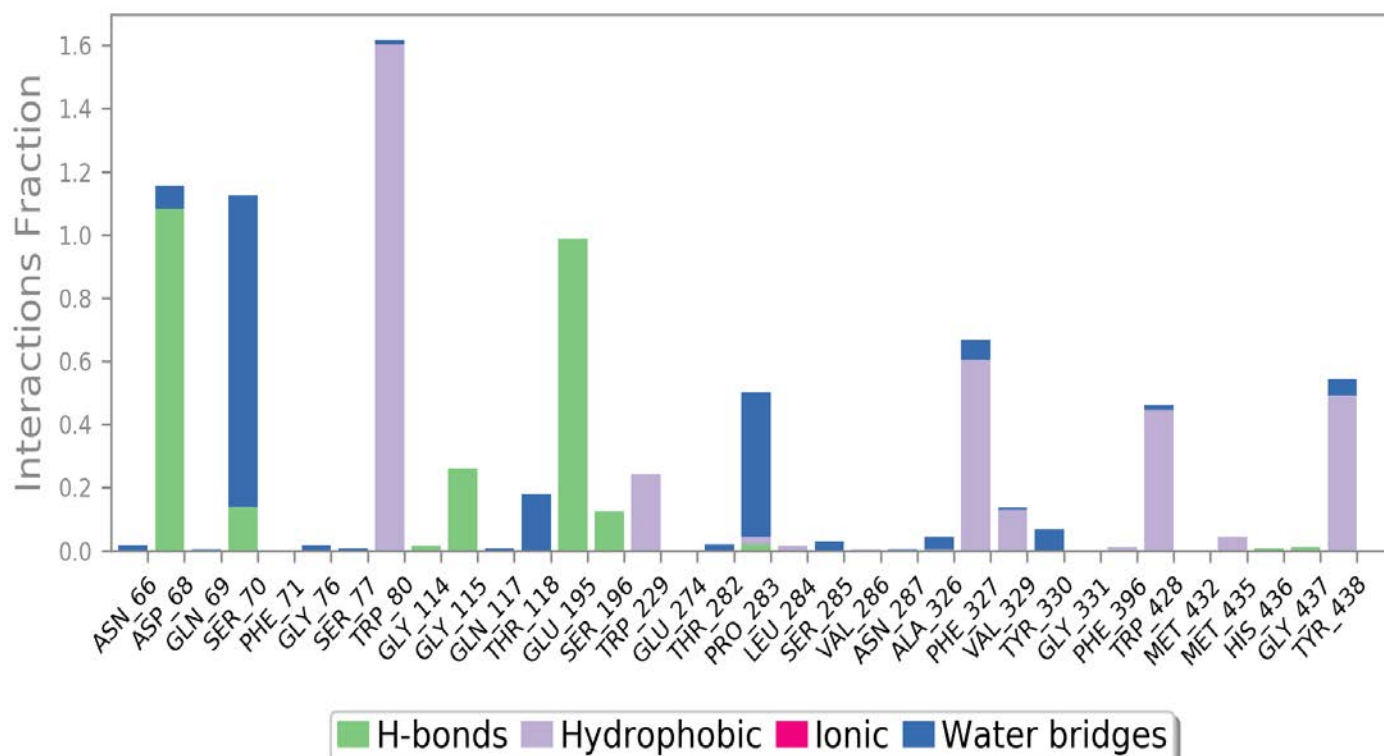

Protein interactions with the ligand can be monitored throughout the simulation. These interactions can be categorized by type and summarized, as shown in the plot above. Protein-ligand interactions (or 'contacts') are categorized into four types: Hydrogen Bonds, Hydrophobic, Ionic and Water Bridges. Each interaction type contains more specific subtypes, which can be explored through the 'Simulation Interactions Diagram' panel. The stacked bar charts are normalized over the course of the trajectory: for example, a value of 0.7 suggests that 70% of the simulation time the specific interaction is maintained. Values over 1.0 are possible as some protein residue may make multiple contacts of same subtype with the ligand.

**Hydrogen Bonds:** (H-bonds) play a significant role in ligand binding. Consideration of hydrogen-bonding properties in drug design is important because of their strong influence on drug specificity, metabolism and adsorption. Hydrogen bonds between a protein and a ligand can be further broken down into four subtypes: backbone acceptor; backbone donor; side-chain acceptor; side-chain donor.

The current geometric criteria for protein-ligand H-bond is: distance of 2.5 Å between the donor and acceptor atoms (D—H...A); a donor angle of  $\geq 120^\circ$  between the donor-hydrogen-acceptor atoms (D—H...A); and an acceptor angle of  $\geq 90^\circ$  between the hydrogen-acceptor-bonded\_atom atoms (H...A—X).

**Hydrophobic contacts:** fall into three subtypes:  $\pi$ -Cation;  $\pi$ - $\pi$ ; and Other, non-specific interactions. Generally these type of interactions involve a hydrophobic amino acid and an aromatic or aliphatic group on the ligand, but we have extended this category to also include  $\pi$ -Cation interactions.

The current geometric criteria for hydrophobic interactions is as follows:  $\pi$ -Cation — Aromatic and charged groups within 4.5 Å;  $\pi$ - $\pi$  — Two aromatic groups stacked face-to-face or face-to-edge; Other — A non-specific hydrophobic sidechain within 3.6 Å of a ligand's aromatic or aliphatic carbons.

**Ionic interactions:** or polar interactions, are between two oppositely charged atoms that are within 3.7 Å of each other and do not involve a hydrogen bond. We also monitor Protein-Metal-Ligand interactions, which are defined by a metal ion coordinated within 3.4 Å of protein's and ligand's heavy atoms (except carbon). All ionic interactions are broken down into two subtypes: those mediated by a protein backbone or side chains.

**Water Bridges:** are hydrogen-bonded protein-ligand interactions mediated by a water molecule. The hydrogen-bond geometry is slightly relaxed from the standard H-bond definition.

The current geometric criteria for a protein-water or water-ligand H-bond are: a distance of 2.8 Å between the donor and acceptor atoms (D—H...A); a donor angle of  $\geq 110^\circ$  between the donor-hydrogen-acceptor atoms (D—H...A); and an acceptor angle of  $\geq 90^\circ$  between the hydrogen-acceptor-bonded\_atom atoms (H...A—X).



## Protein-Ligand Contacts (cont.)

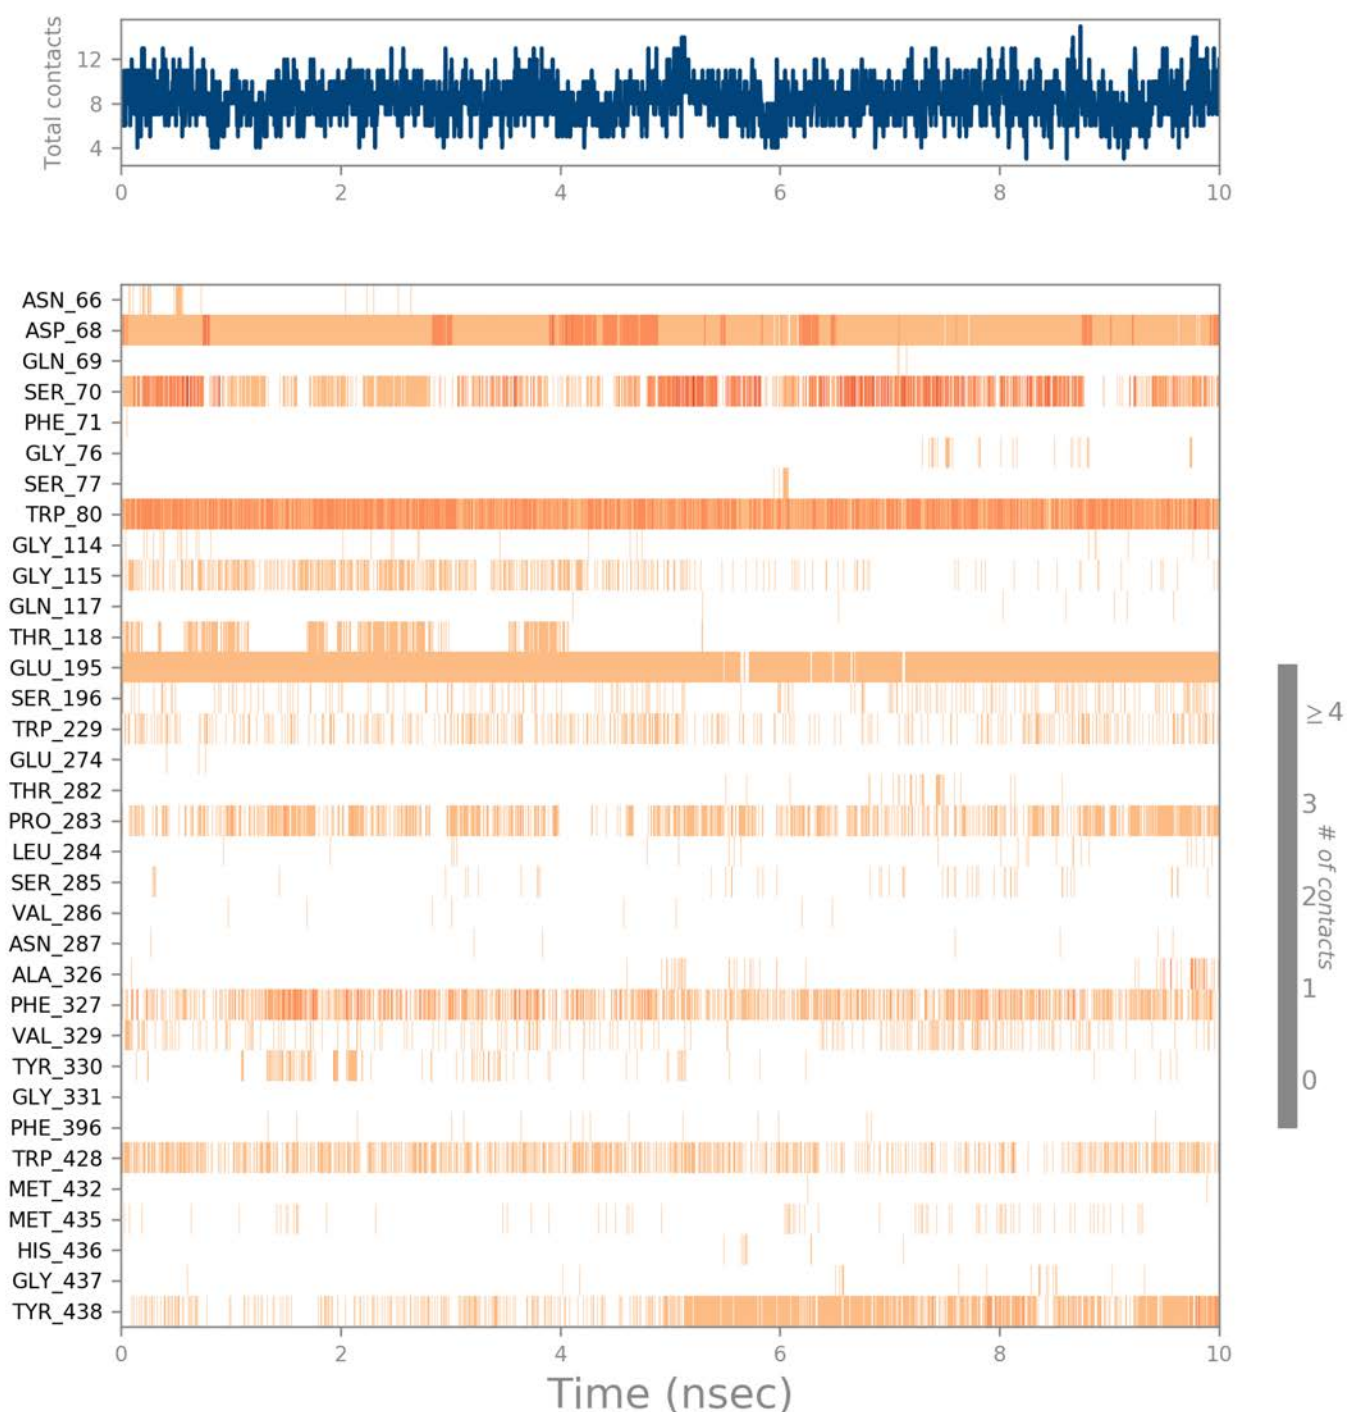

A timeline representation of the interactions and contacts (**H-bonds, Hydrophobic, Ionic, Water bridges**) summarized in the previous page. The top panel shows the total number of specific contacts the protein makes with the ligand over the course of the trajectory. The bottom panel shows which residues interact with the ligand in each trajectory frame. Some residues make more than one specific contact with the ligand, which is represented by a darker shade of orange, according to the scale to the right of the plot.

## Ligand-Protein Contacts

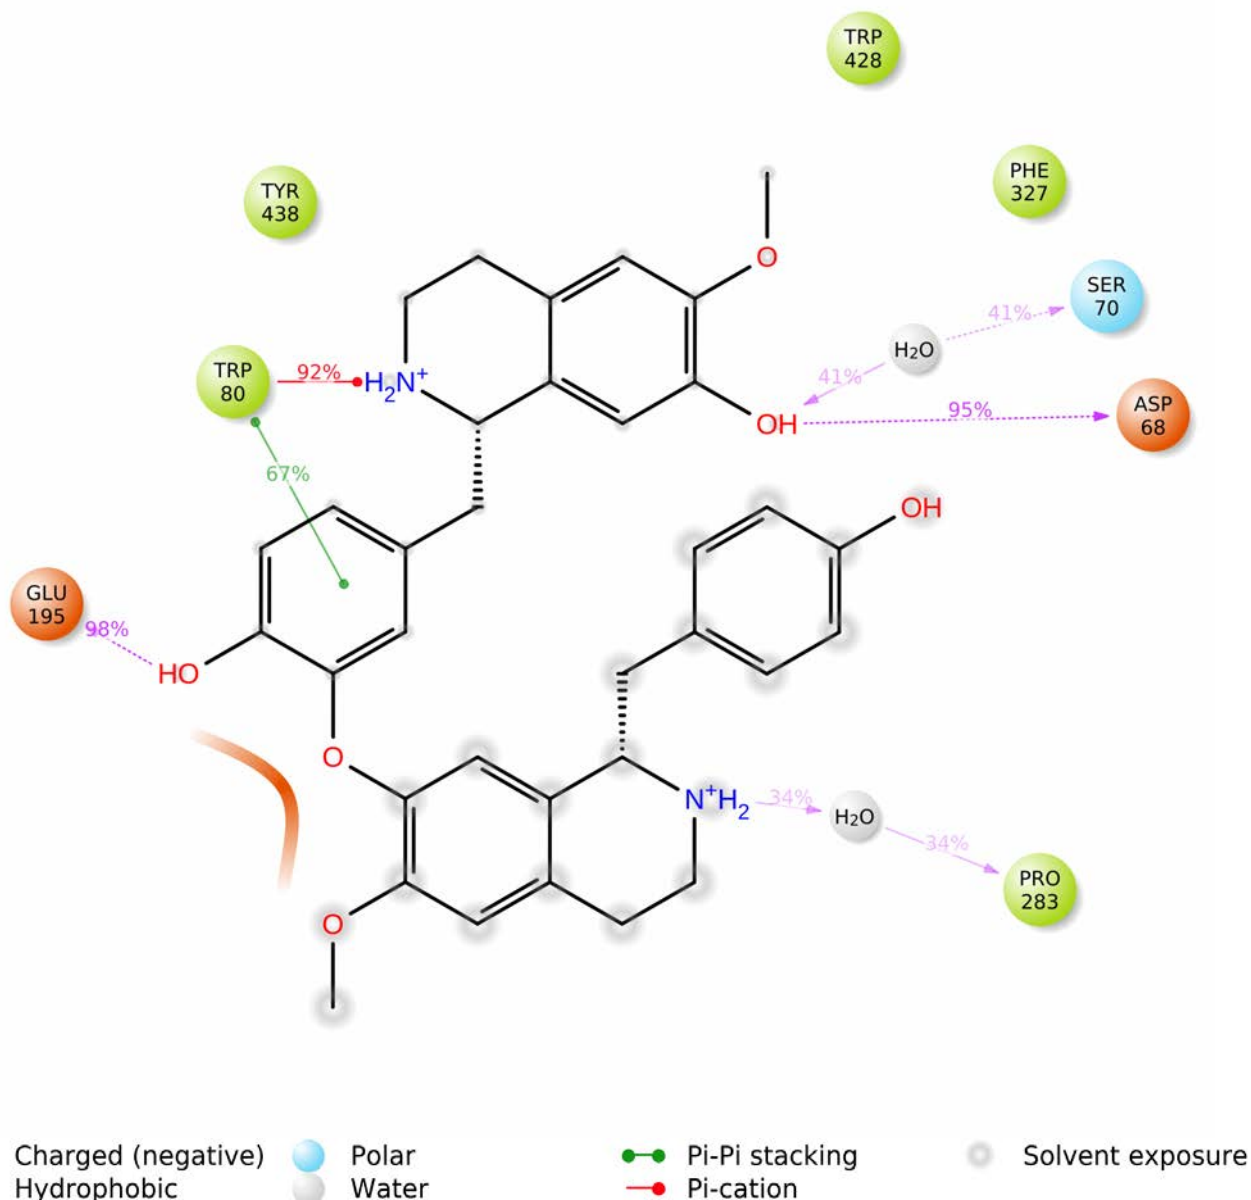

A schematic of detailed ligand atom interactions with the protein residues. Interactions that occur more than **30.0%** of the simulation time in the selected trajectory ( 0.00 through 10.00 nsec), are shown.

Note: it is possible to have interactions with >100% as some residues may have multiple interactions of a single type with the same ligand atom. For example, the ARG side chain has four H-bond donors that can all hydrogen-bond to a single H-bond acceptor.

## Ligand Torsion Profile

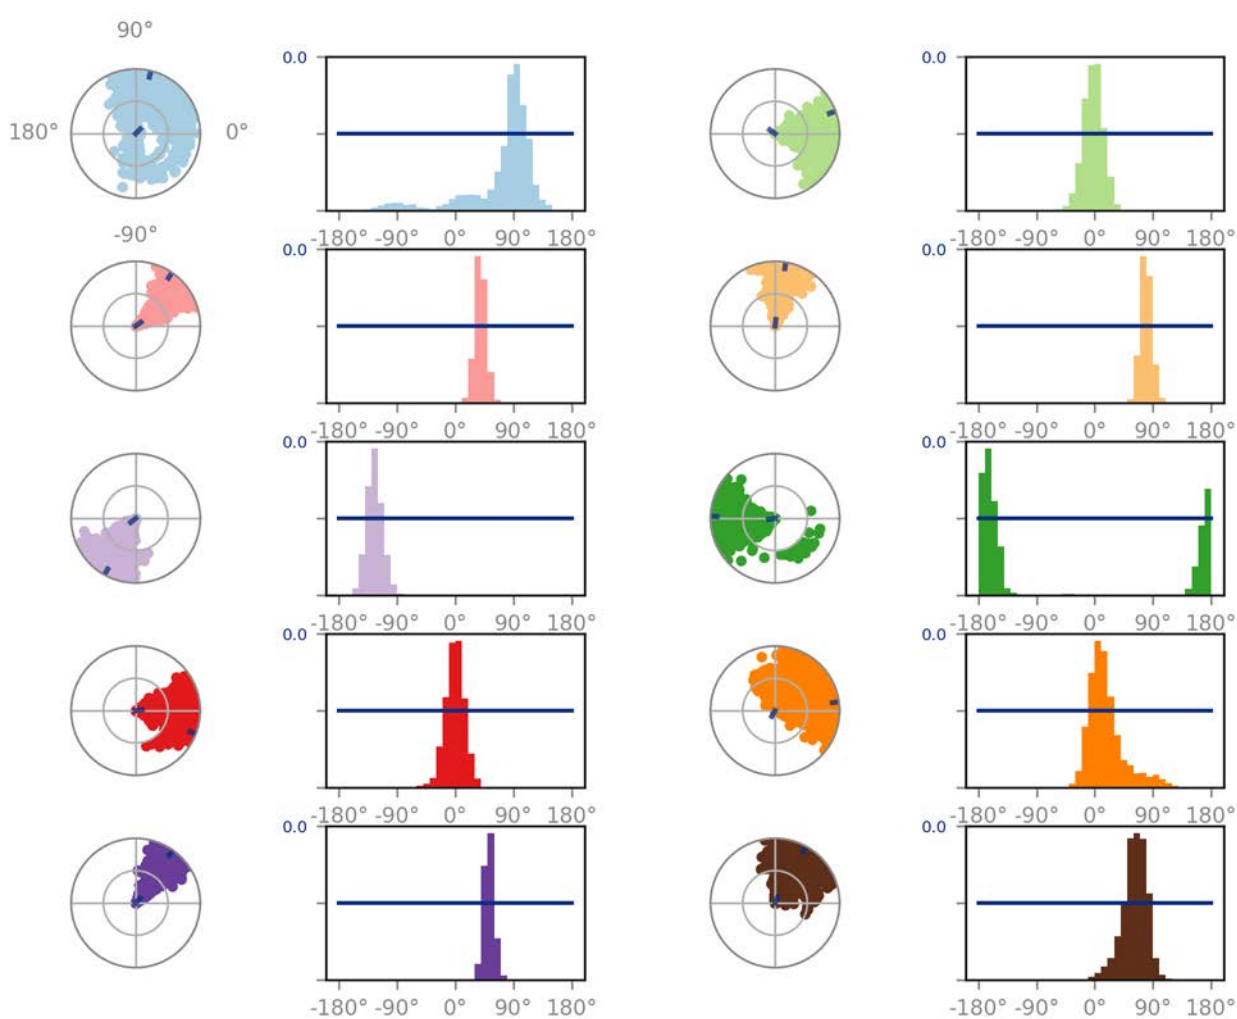

## Ligand Torsion Profile (cont.)

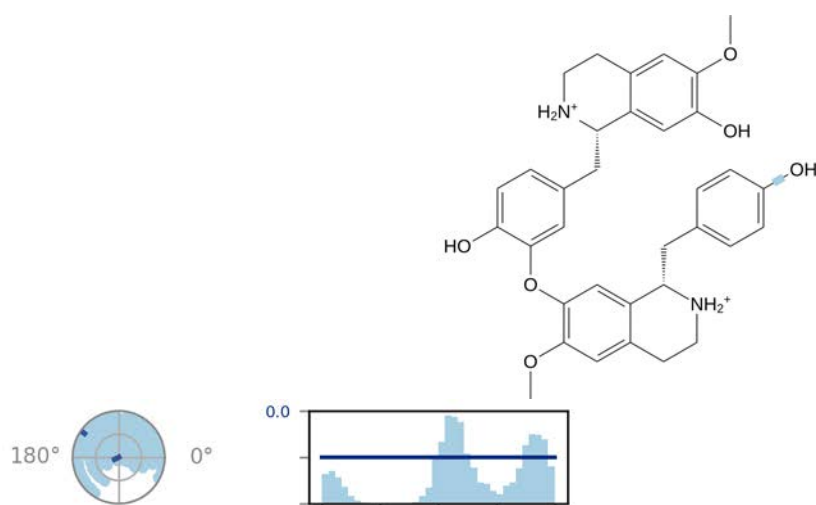

The ligand torsions plot summarizes the conformational evolution of every rotatable bond (RB) in the ligand throughout the simulation trajectory ( 0.00 through 10.00 nsec). The top panel shows the 2d schematic of a ligand with color-coded rotatable bonds. Each rotatable bond torsion is accompanied by a dial plot and bar plots of the same color.

Dial (or radial) plots describe the conformation of the torsion throughout the course of the simulation. The beginning of the simulation is in the center of the radial plot and the time evolution is plotted radially outwards.

The bar plots summarize the data on the dial plots, by showing the probability density of the torsion. If torsional potential information is available, the plot also shows the potential of the rotatable bond (by summing the potential of the related torsions). The values of the potential are on the left Y-axis of the chart, and are expressed in *kcal/mol*. Looking at the histogram and torsion potential relationships may give insights into the conformational strain the ligand undergoes to maintain a protein-bound conformation.

## Ligand Properties

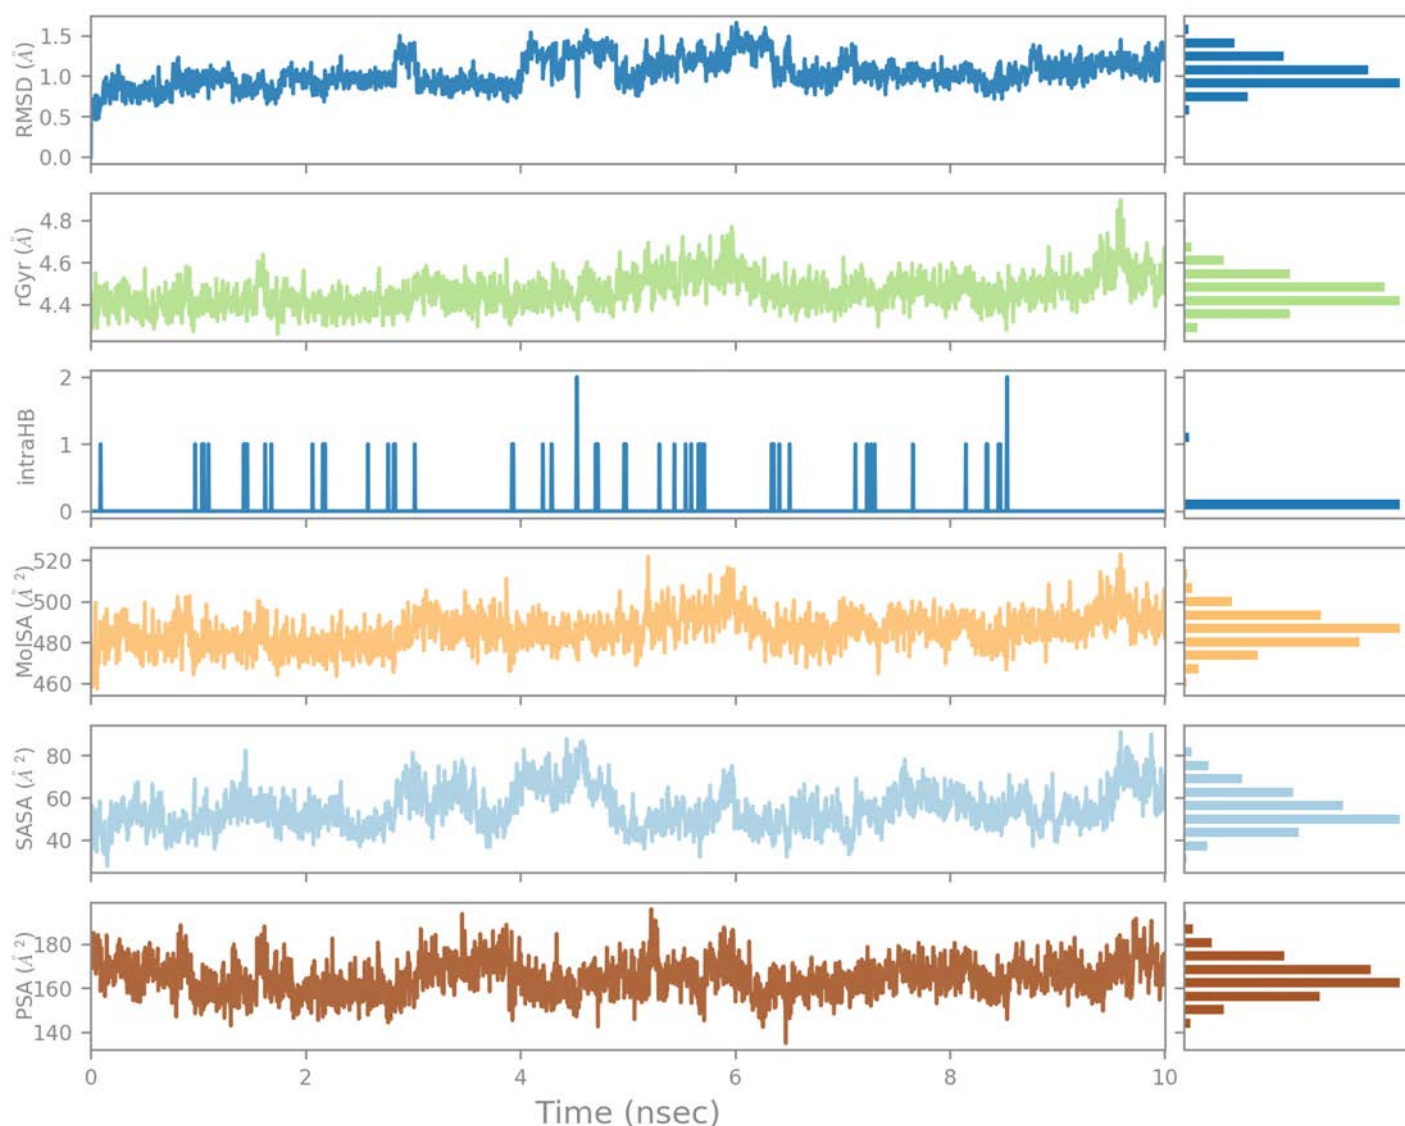

**Ligand RMSD:** Root mean square deviation of a ligand with respect to the reference conformation (typically the first frame is used as the reference and it is regarded as time  $t=0$ ).

**Radius of Gyration (rGyr):** Measures the 'extendedness' of a ligand, and is equivalent to its principal moment of inertia.

**Intramolecular Hydrogen Bonds (intraHB):** Number of internal hydrogen bonds (HB) within a ligand molecule.

**Molecular Surface Area (MolSA):** Molecular surface calculation with 1.4 Å probe radius. This value is equivalent to a van der Waals surface area.

**Solvent Accessible Surface Area (SASA):** Surface area of a molecule accessible by a water molecule.

**Polar Surface Area (PSA):** Solvent accessible surface area in a molecule contributed only by oxygen and nitrogen atoms.



## Report S9

# MD Simulation Report on BChE - Stepharine Interactions

### Simulation Details

Jobname: md\_job\_6EP4\_2\_dock-1  
Entry title: 6EP4\_2\_dock\_1

| CPU # | Job Type | Ensemble | Temp. [K] | Sim. Time [ns] | # Atoms | # Waters | Charge |
|-------|----------|----------|-----------|----------------|---------|----------|--------|
| 1     | mdsim    | NPT      | 300.0     | 10.005         | 50997   | 14187    | 0      |

### Protein Information

| Tot. Residues | Prot. Chain(s) | Res. in Chain(s)  | # Atoms | # Heavy Atoms | Charge |
|---------------|----------------|-------------------|---------|---------------|--------|
| 527           | 'NoChainId'    | ict_values([527]) | 8313    | 4203          | +2     |

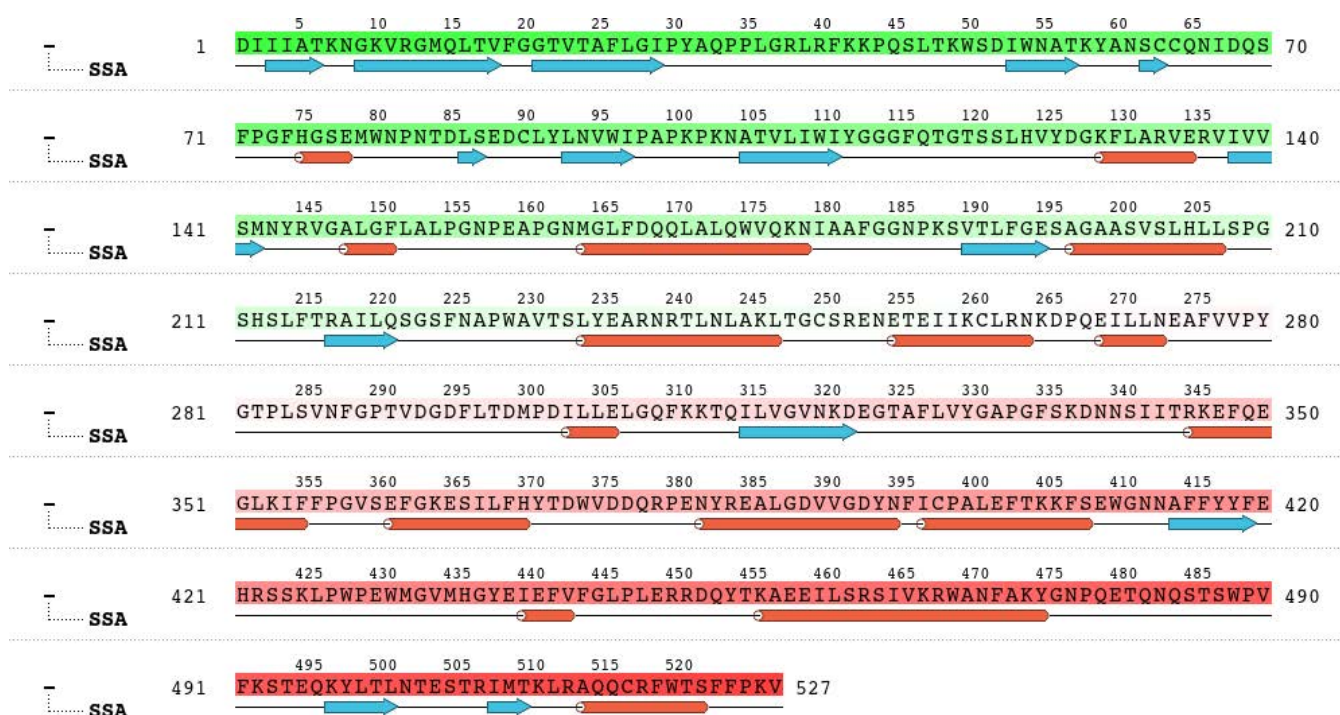

### Ligand Information

|                    |                                                  |
|--------------------|--------------------------------------------------|
| SMILES             | COc1c(OC)cc(CC[NH2+][C@H]2C3)c2c1C34C=CC(=O)C=C4 |
| PDB Name           | 'UNK'                                            |
| Num. of Atoms      | 42 (total) 22 (heavy)                            |
| Atomic Mass        | 298.365 au                                       |
| Charge             | +1                                               |
| Mol. Formula       | C18H20NO3                                        |
| Num. of Fragments  | 1                                                |
| Num. of Rot. Bonds | 2                                                |

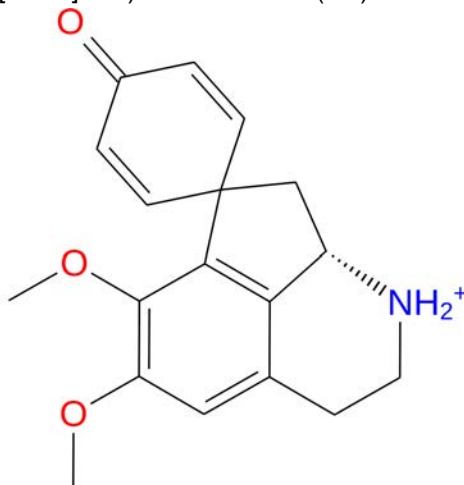

### Counter Ion/Salt Information

|    |    |        |     |
|----|----|--------|-----|
| Cl | 42 | 53.826 | -42 |
| Na | 39 | 49.982 | +39 |



## Protein-Ligand RMSD

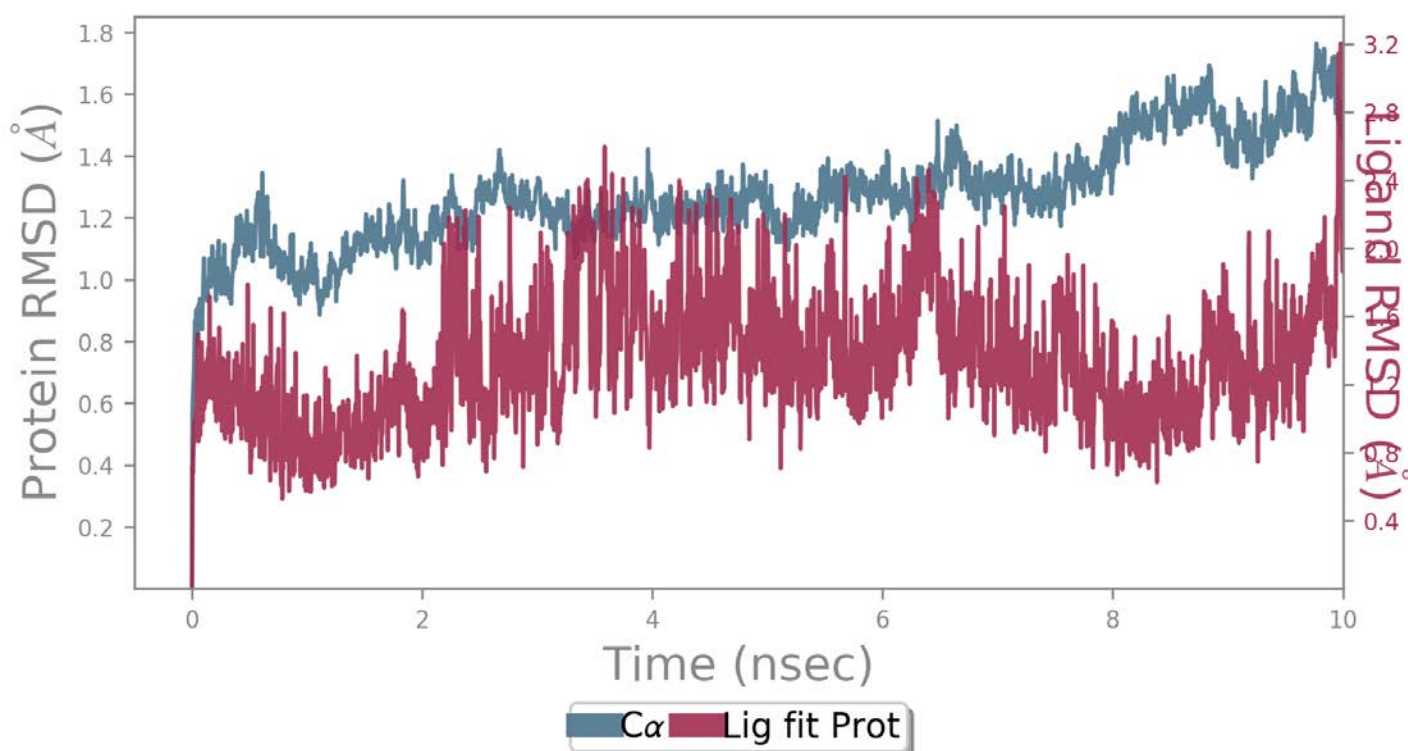

The Root Mean Square Deviation (RMSD) is used to measure the average change in displacement of a selection of atoms for a particular frame with respect to a reference frame. It is calculated for all frames in the trajectory. The RMSD for frame  $x$  is:

$$RMSD_x = \sqrt{\frac{1}{N} \sum_{i=1}^N (r'_i(t_x) - r_i(t_{ref}))^2}$$

where  $N$  is the number of atoms in the atom selection;  $t_{ref}$  is the reference time, (typically the first frame is used as the reference and it is regarded as time  $t=0$ ); and  $r'$  is the position of the selected atoms in frame  $x$  after superimposing on the reference frame, where frame  $x$  is recorded at time  $t_x$ . The procedure is repeated for every frame in the simulation trajectory.

**Protein RMSD:** The above plot shows the RMSD evolution of a protein (left Y-axis). All protein frames are first aligned on the reference frame backbone, and then the RMSD is calculated based on the atom selection. Monitoring the RMSD of the protein can give insights into its structural conformation throughout the simulation. RMSD analysis can indicate if the simulation has equilibrated — its fluctuations towards the end of the simulation are around some thermal average structure. Changes of the order of 1-3 Å are perfectly acceptable for small, globular proteins. Changes much larger than that, however, indicate that the protein is undergoing a large conformational change during the simulation. It is also important that your simulation converges — the RMSD values stabilize around a fixed value. If the RMSD of the protein is still increasing or decreasing on average at the end of the simulation, then your system has not equilibrated, and your simulation may not be long enough for rigorous analysis.

**Ligand RMSD:** Ligand RMSD (right Y-axis) indicates how stable the ligand is with respect to the protein and its binding pocket. In the above plot, 'Lig fit Prot' shows the RMSD of a ligand when the protein-ligand complex is first aligned on the protein backbone of the reference and then the RMSD of the ligand heavy atoms is measured. If the values observed are significantly larger than the RMSD of the protein, then it is likely that the ligand has diffused away from its initial binding site.

## Protein RMSF

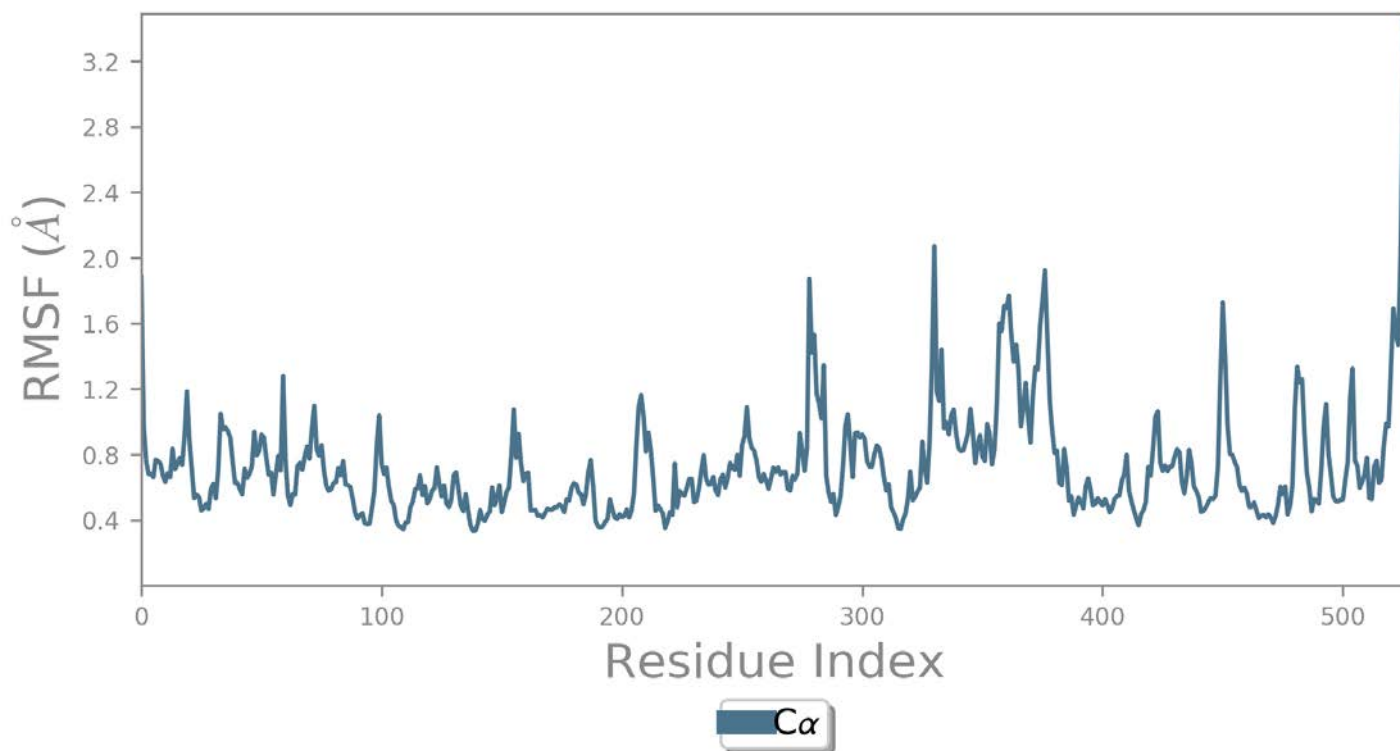

The Root Mean Square Fluctuation (RMSF) is useful for characterizing local changes along the protein chain. The RMSF for residue  $i$  is:

$$RMSF_i = \sqrt{\frac{1}{T} \sum_{t=1}^T \langle (r'_i(t)) - r_i(t_{ref})^2 \rangle}$$

where  $T$  is the trajectory time over which the RMSF is calculated,  $t_{ref}$  is the reference time,  $r_i$  is the position of residue  $i$ ;  $r'$  is the position of atoms in residue  $i$  after superposition on the reference, and the angle brackets indicate that the average of the square distance is taken over the selection of atoms in the residue.

On this plot, peaks indicate areas of the protein that fluctuate the most during the simulation. Typically you will observe that the tails ( $N$ - and  $C$ -terminal) fluctuate more than any other part of the protein. Secondary structure elements like alpha helices and beta strands are usually more rigid than the unstructured part of the protein, and thus fluctuate less than the loop regions.

## Protein Secondary Structure

% Helix  
28.54

% Strand  
13.60

% Total SSE  
42.13

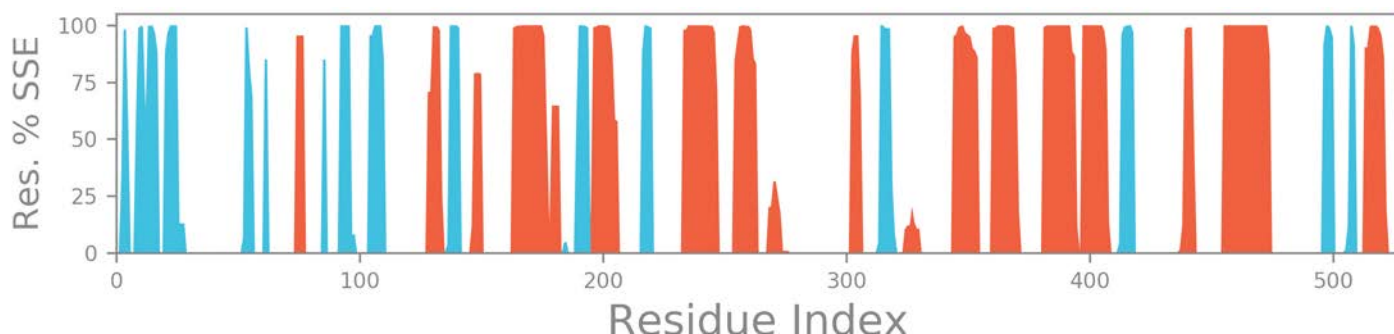

Protein secondary structure elements (SSE) like **alpha-helices** and **beta-strands** are monitored throughout the simulation. The plot above reports SSE distribution by residue index throughout the protein structure. The plot below summarizes the SSE composition for each trajectory frame over the course of the simulation, and the plot at the bottom monitors each residue and its SSE assignment over time.

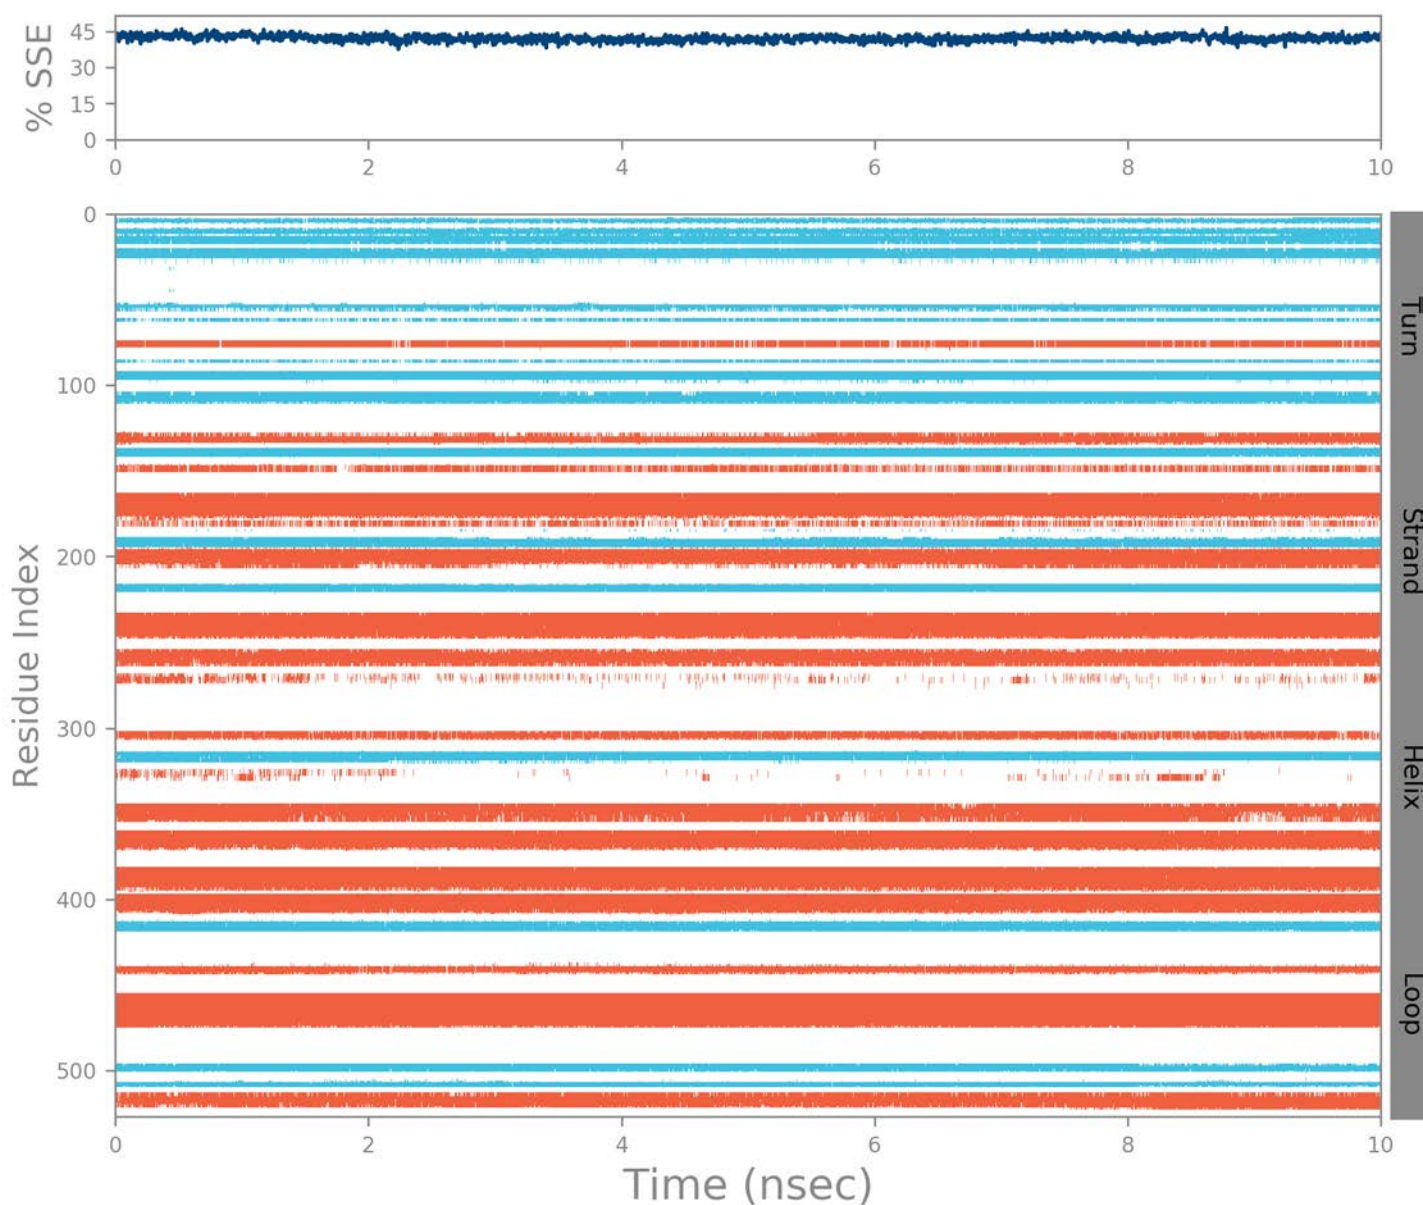

## Stepharine Ligand RMSF

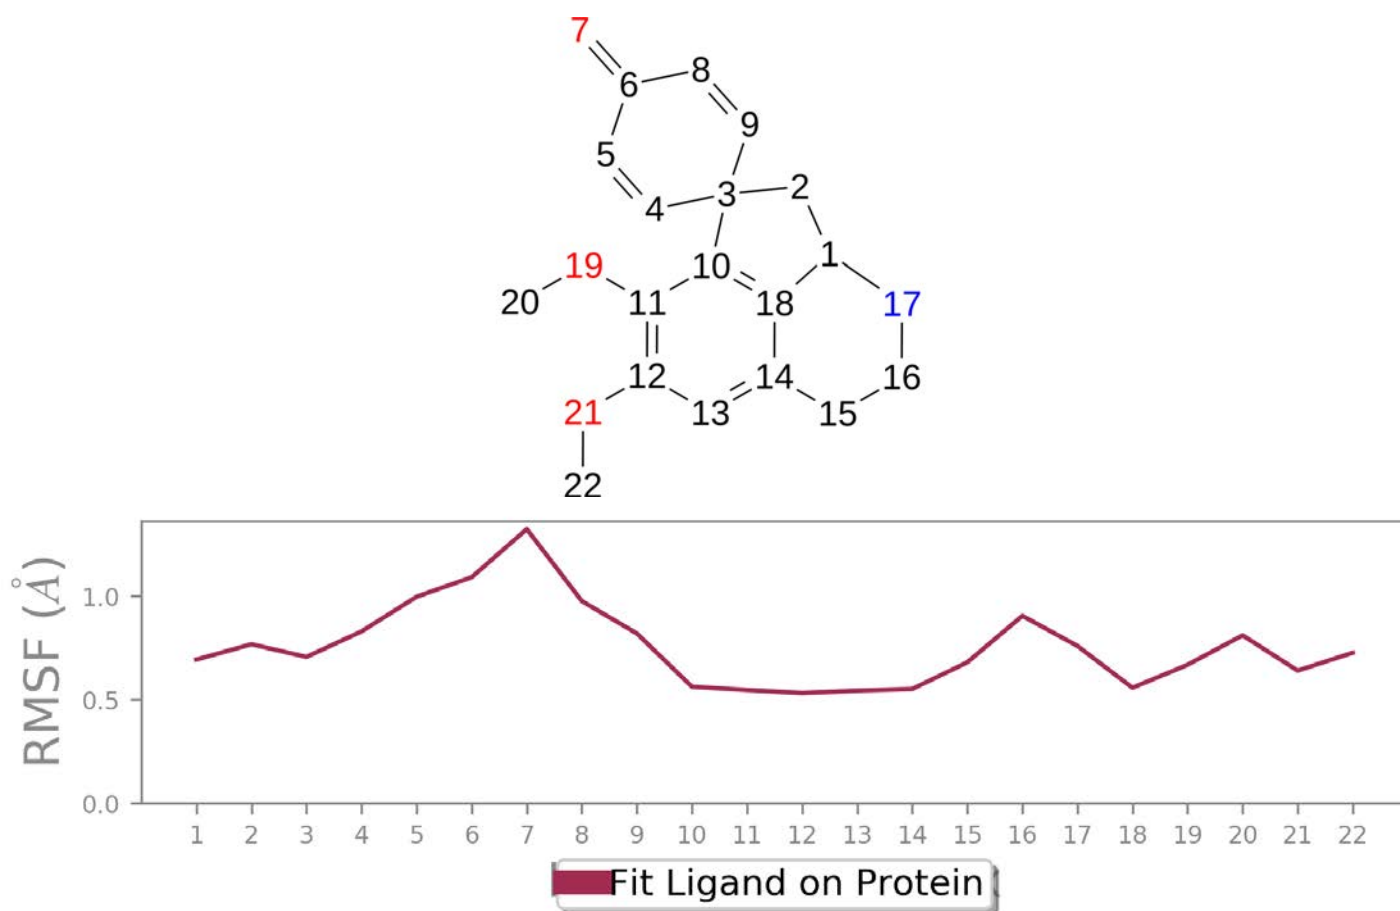

The Ligand Root Mean Square Fluctuation (L-RMSF) is useful for characterizing changes in the ligand atom positions. The RMSF for atom  $i$  is:

$$RMSF_i = \sqrt{\frac{1}{T} \sum_{t=1}^T (r'_i(t) - r_i(t_{ref}))^2}$$

where  $T$  is the trajectory time over which the RMSF is calculated,  $t_{ref}$  is the reference time (usually for the first frame, and is regarded as the zero of time);  $r$  is the position of atom  $i$  in the reference at time  $t_{ref}$  and  $r'$  is the position of atom  $i$  at time  $t$  after superposition on the reference frame.

Ligand RMSF shows the ligand's fluctuations broken down by atom, corresponding to the 2D structure in the top panel. The ligand RMSF may give you insights on how ligand fragments interact with the protein and their entropic role in the binding event. In the bottom panel, the 'Fit Ligand on Protein' line shows the ligand fluctuations, with respect to the protein. The protein-ligand complex is first aligned on the protein backbone and then the ligand RMSF is measured on the ligand heavy atoms.



## Protein-Ligand Contacts

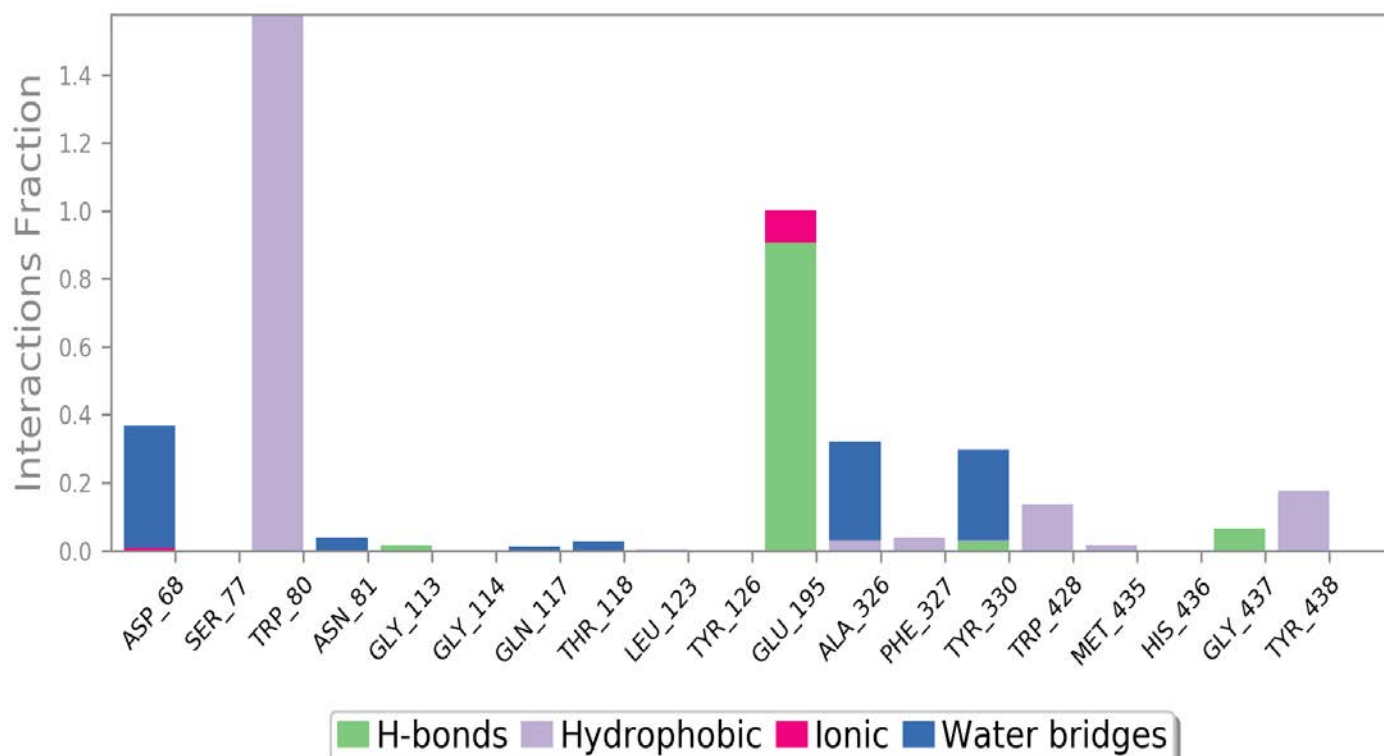

Protein interactions with the ligand can be monitored throughout the simulation. These interactions can be categorized by type and summarized, as shown in the plot above. Protein-ligand interactions (or 'contacts') are categorized into four types: Hydrogen Bonds, Hydrophobic, Ionic and Water Bridges. Each interaction type contains more specific subtypes, which can be explored through the 'Simulation Interactions Diagram' panel. The stacked bar charts are normalized over the course of the trajectory: for example, a value of 0.7 suggests that 70% of the simulation time the specific interaction is maintained. Values over 1.0 are possible as some protein residue may make multiple contacts of same subtype with the ligand.

**Hydrogen Bonds:** (H-bonds) play a significant role in ligand binding. Consideration of hydrogen-bonding properties in drug design is important because of their strong influence on drug specificity, metabolism and adsorption. Hydrogen bonds between a protein and a ligand can be further broken down into four subtypes: backbone acceptor; backbone donor; side-chain acceptor; side-chain donor.

The current geometric criteria for protein-ligand H-bond is: distance of 2.5 Å between the donor and acceptor atoms (D—H...A); a donor angle of  $\geq 120^\circ$  between the donor-hydrogen-acceptor atoms (D—H...A); and an acceptor angle of  $\geq 90^\circ$  between the hydrogen-acceptor-bonded\_atom atoms (H...A—X).

**Hydrophobic contacts:** fall into three subtypes:  $\pi$ -Cation;  $\pi$ - $\pi$ ; and Other, non-specific interactions. Generally these type of interactions involve a hydrophobic amino acid and an aromatic or aliphatic group on the ligand, but we have extended this category to also include  $\pi$ -Cation interactions.

The current geometric criteria for hydrophobic interactions is as follows:  $\pi$ -Cation — Aromatic and charged groups within 4.5 Å;  $\pi$ - $\pi$  — Two aromatic groups stacked face-to-face or face-to-edge; Other — A non-specific hydrophobic sidechain within 3.6 Å of a ligand's aromatic or aliphatic carbons.

**Ionic interactions:** or polar interactions, are between two oppositely charged atoms that are within 3.7 Å of each other and do not involve a hydrogen bond. We also monitor Protein-Metal-Ligand interactions, which are defined by a metal ion coordinated within 3.4 Å of protein's and ligand's heavy atoms (except carbon). All ionic interactions are broken down into two subtypes: those mediated by a protein backbone or side chains.

**Water Bridges:** are hydrogen-bonded protein-ligand interactions mediated by a water molecule. The hydrogen-bond geometry is slightly relaxed from the standard H-bond definition.

The current geometric criteria for a protein-water or water-ligand H-bond are: a distance of 2.8 Å between the donor and acceptor atoms (D—H...A); a donor angle of  $\geq 110^\circ$  between the donor-hydrogen-acceptor atoms (D—H...A); and an acceptor angle of  $\geq 90^\circ$  between the hydrogen-acceptor-bonded\_atom atoms (H...A—X).

## Protein-Ligand Contacts (cont.)

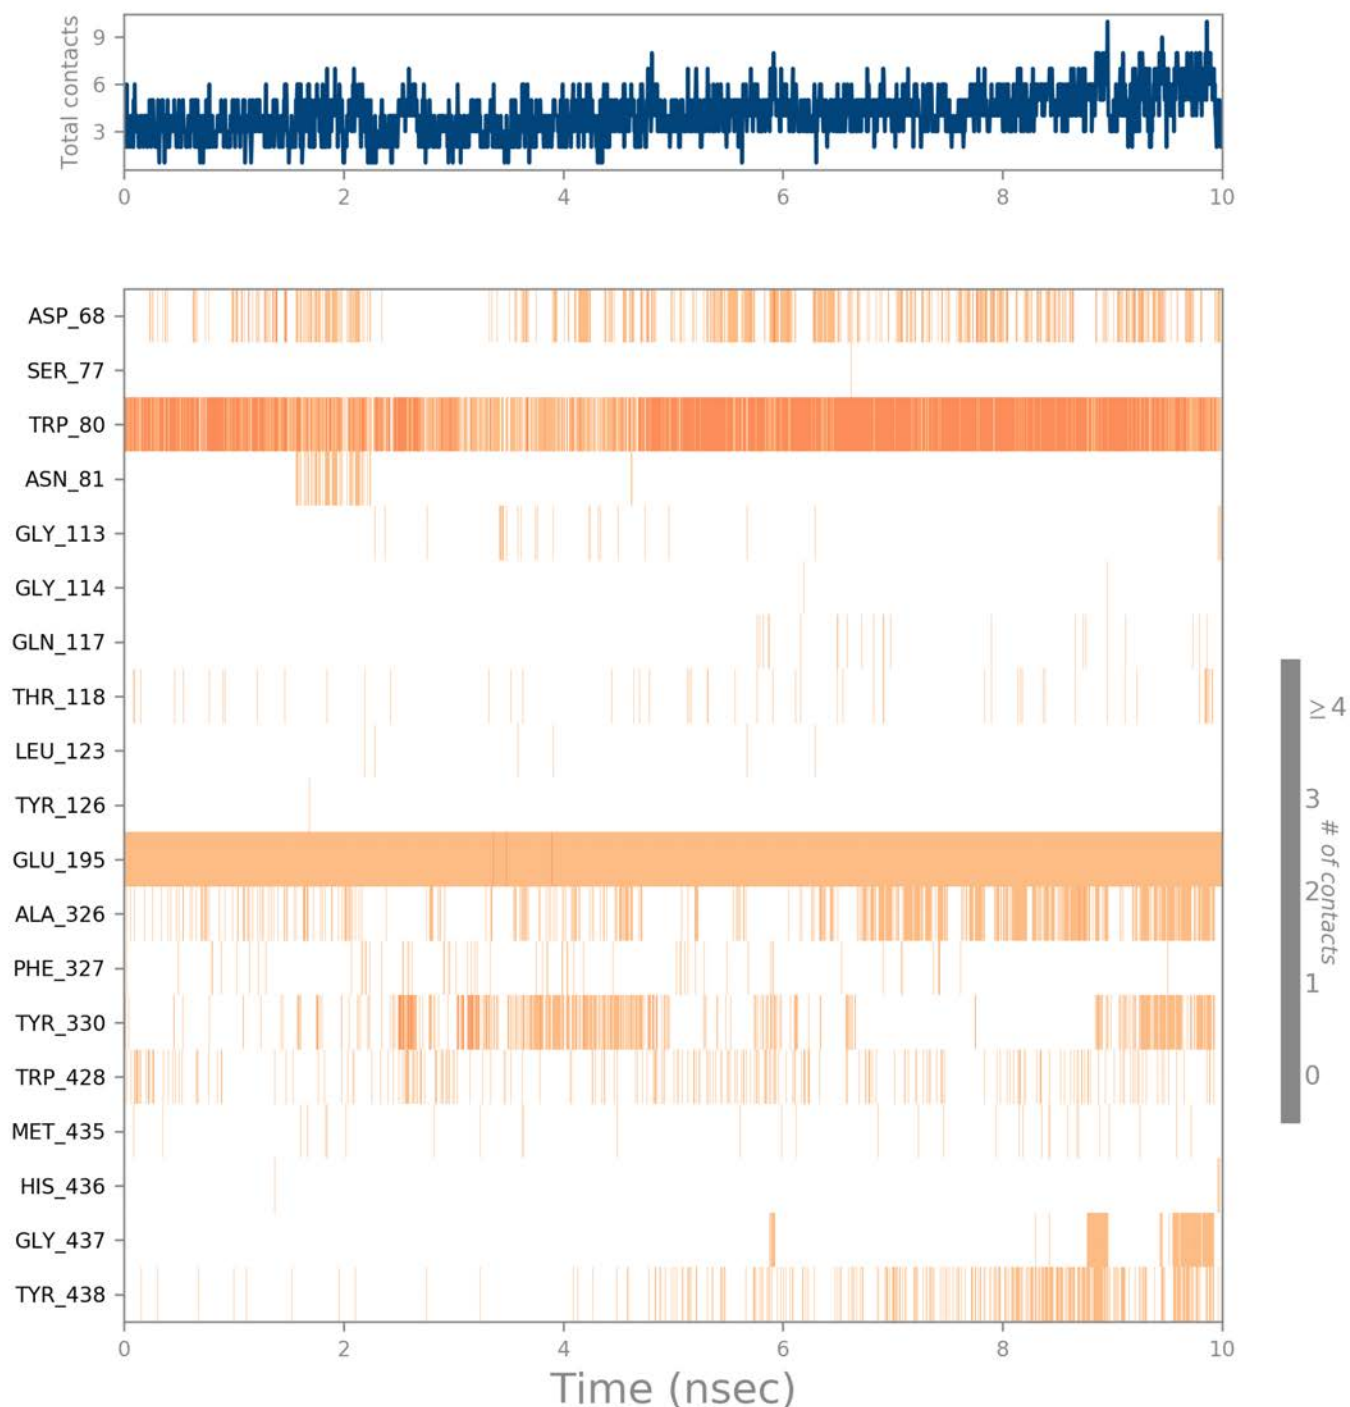

A timeline representation of the interactions and contacts (**H-bonds, Hydrophobic, Ionic, Water bridges**) summarized in the previous page. The top panel shows the total number of specific contacts the protein makes with the ligand over the course of the trajectory. The bottom panel shows which residues interact with the ligand in each trajectory frame. Some residues make more than one specific contact with the ligand, which is represented by a darker shade of orange, according to the scale to the right of the plot.

## Ligand-Protein Contacts

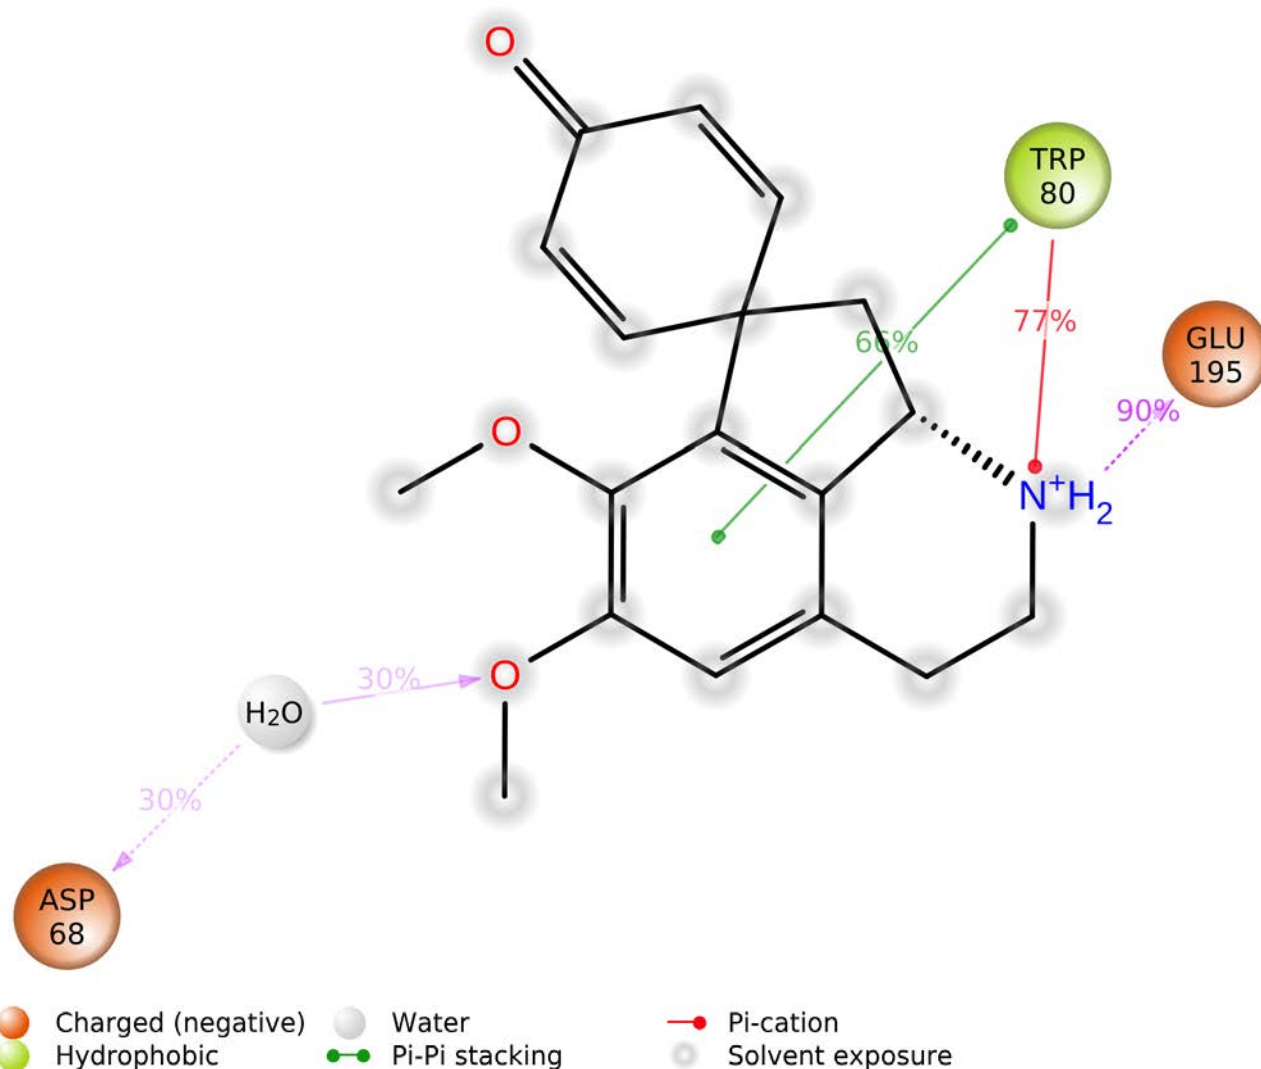

A schematic of detailed ligand atom interactions with the protein residues. Interactions that occur more than **30.0%** of the simulation time in the selected trajectory ( 0.00 through 10.00 nsec), are shown.

Note: it is possible to have interactions with >100% as some residues may have multiple interactions of a single type with the same ligand atom. For example, the ARG side chain has four H-bond donors that can all hydrogen-bond to a single H-bond acceptor.



## Ligand Torsion Profile

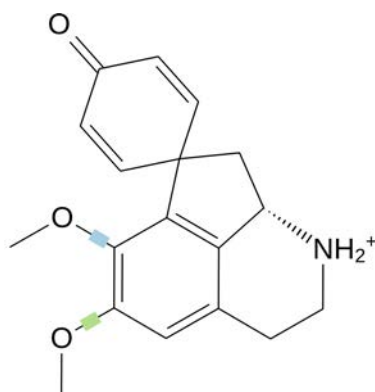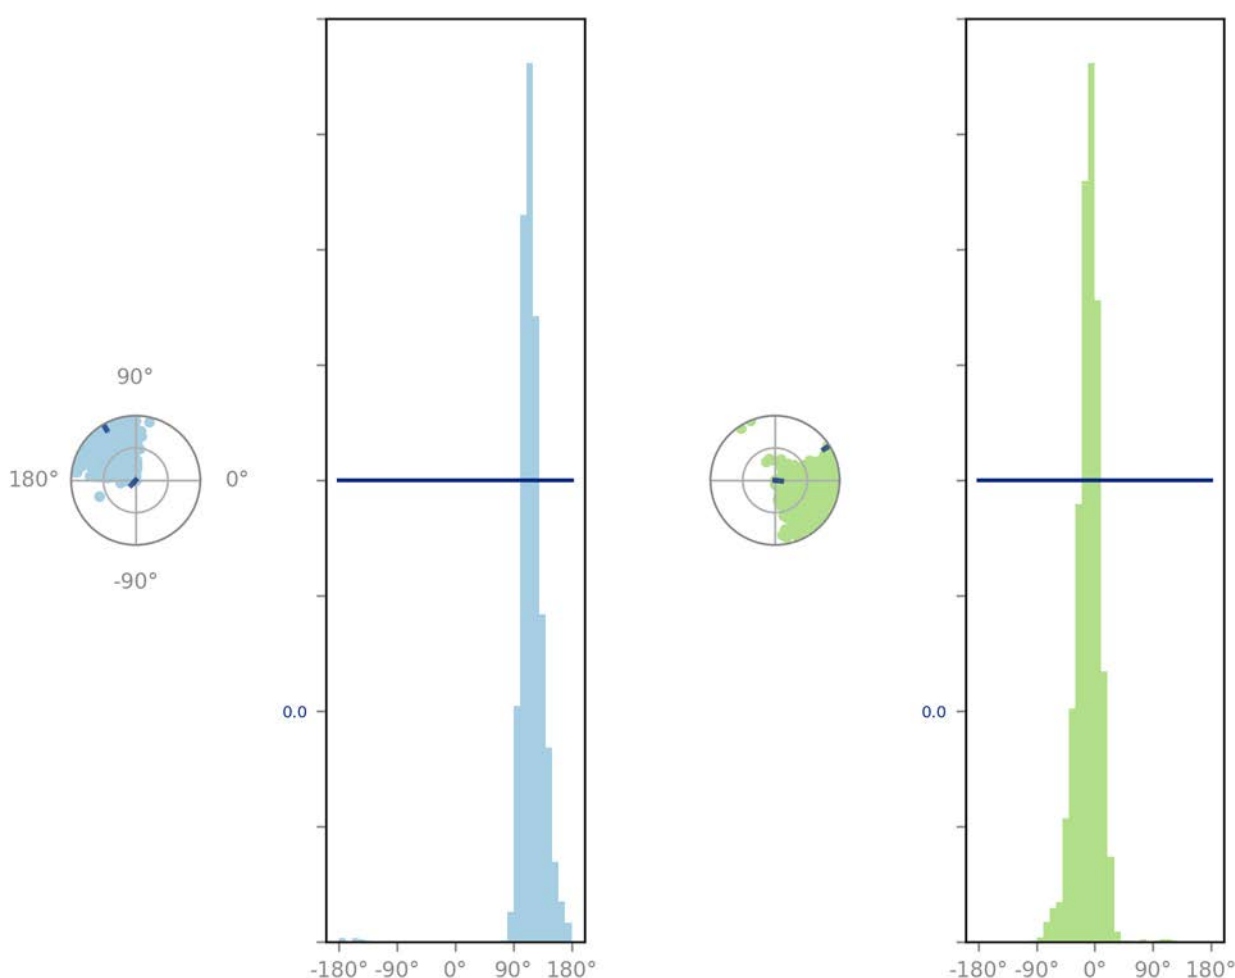

The ligand torsions plot summarizes the conformational evolution of every rotatable bond (RB) in the ligand throughout the simulation trajectory ( 0.00 through 10.00 nsec). The top panel shows the 2d schematic of a ligand with color-coded rotatable bonds. Each rotatable bond torsion is accompanied by a dial plot and bar plots of the same color.

Dial (or radial) plots describe the conformation of the torsion throughout the course of the simulation. The beginning of the simulation is in the center of the radial plot and the time evolution is plotted radially outwards.

The bar plots summarize the data on the dial plots, by showing the probability density of the torsion. If torsional potential information is available, the plot also shows the potential of the rotatable bond (by summing the potential of the related torsions). The values of the potential are on the left Y-axis of the chart, and are expressed in *kcal/mol*. Looking at the histogram and torsion potential relationships may give insights into the

conformational strain the ligand undergoes to maintain a protein-bound conformation.

## Ligand Properties

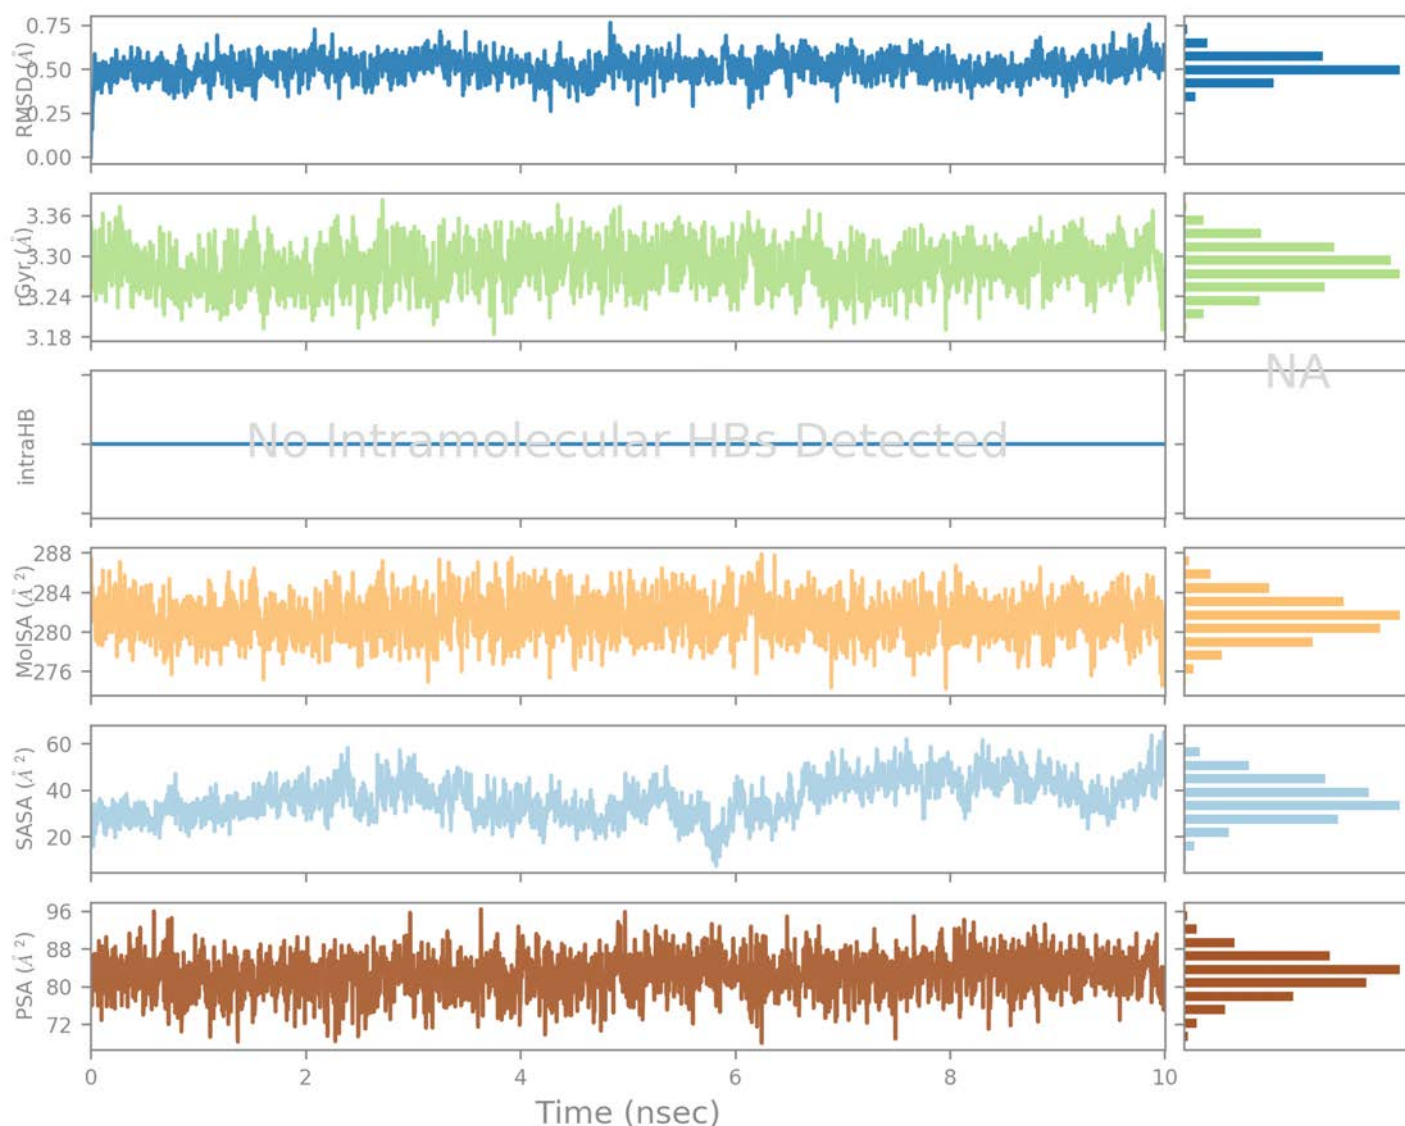

**Ligand RMSD:** Root mean square deviation of a ligand with respect to the reference conformation (typically the first frame is used as the reference and it is regarded as time  $t=0$ ).

**Radius of Gyration (rGyr):** Measures the 'extendedness' of a ligand, and is equivalent to its principal moment of inertia.

**Intramolecular Hydrogen Bonds (intraHB):** Number of internal hydrogen bonds (HB) within a ligand molecule.

**Molecular Surface Area (MolSA):** Molecular surface calculation with 1.4 Å probe radius. This value is equivalent to a van der Waals surface area.

**Solvent Accessible Surface Area (SASA):** Surface area of a molecule accessible by a water molecule.

**Polar Surface Area (PSA):** Solvent accessible surface area in a molecule contributed only by oxygen and nitrogen atoms.

## Report S10

# MD Simulation Report on BChE - Palmatine Interactions

### Simulation Details

Jobname: md\_job\_6EP4\_3-dock-2  
Entry title: 6EP4\_3-dock-2

| CPU # | Job Type | Ensemble | Temp. [K] | Sim. Time [ns] | # Atoms | # Waters | Charge |
|-------|----------|----------|-----------|----------------|---------|----------|--------|
| 1     | mdsim    | NPT      | 300.0     | 10.005         | 51012   | 14190    | 0      |

### Protein Information

| Tot. Residues | Prot. Chain(s) | Res. in Chain(s)  | # Atoms | # Heavy Atoms | Charge |
|---------------|----------------|-------------------|---------|---------------|--------|
| 527           | 'NoChainId'    | ict_values([527]) | 8313    | 4203          | +2     |

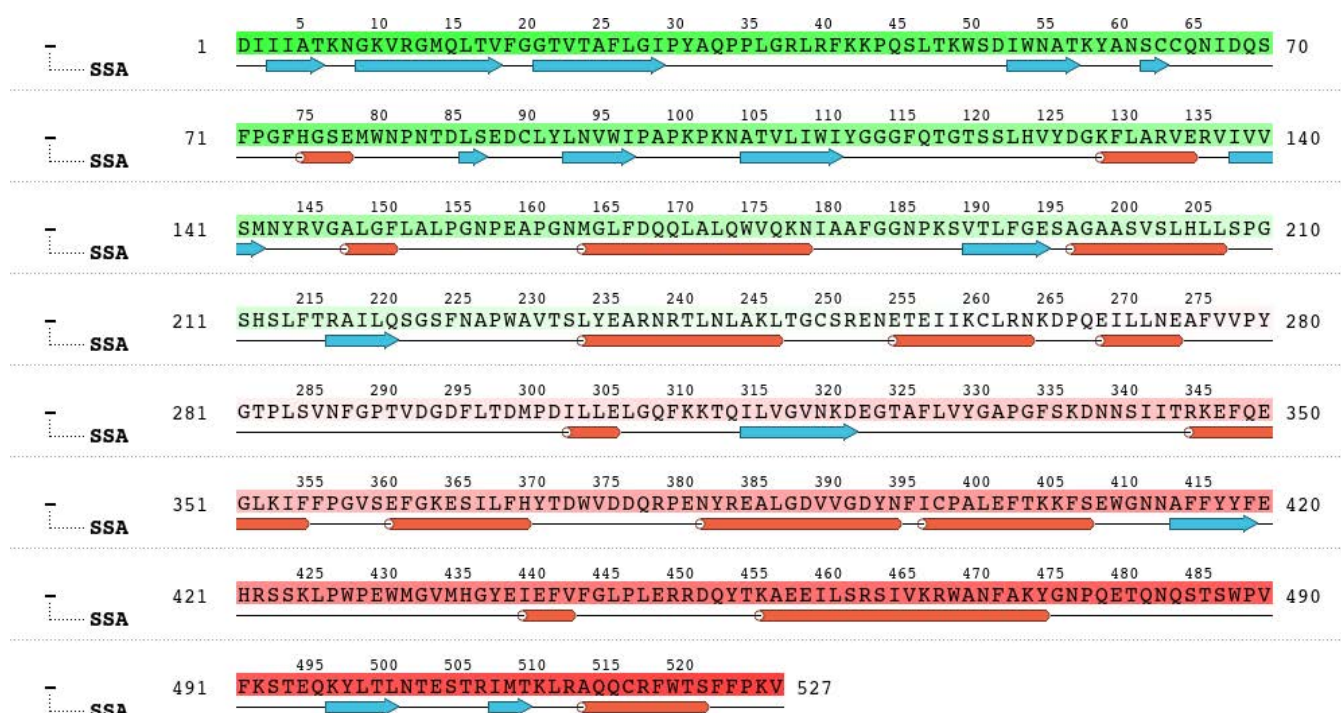

### Ligand Information

|                    |                                                |
|--------------------|------------------------------------------------|
| SMILES             | COc1c(OC)ccc(c12)cc3c4c(CC[n+](c2)c(OC)c(c4)OC |
| PDB Name           | 'UNK'                                          |
| Num. of Atoms      | 48 (total) 26 (heavy)                          |
| Atomic Mass        | 352.414 au                                     |
| Charge             | +1                                             |
| Mol. Formula       | C21H22NO4                                      |
| Num. of Fragments  | 1                                              |
| Num. of Rot. Bonds | 4                                              |

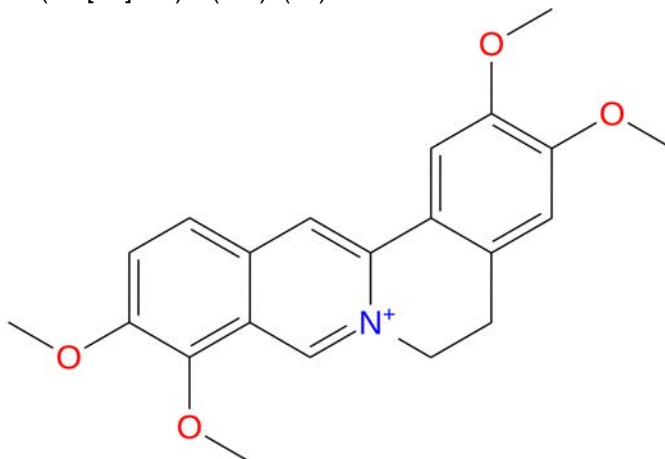

### Counter Ion/Salt Information

| Type            | Num. | Concentration [mM] | Total Charge |
|-----------------|------|--------------------|--------------|
| Cl <sup>-</sup> | 42   | 53.815             | -42          |

|    |    |        |     |
|----|----|--------|-----|
| Na | 39 | 49.971 | +39 |
|----|----|--------|-----|

## Protein-Ligand RMSD

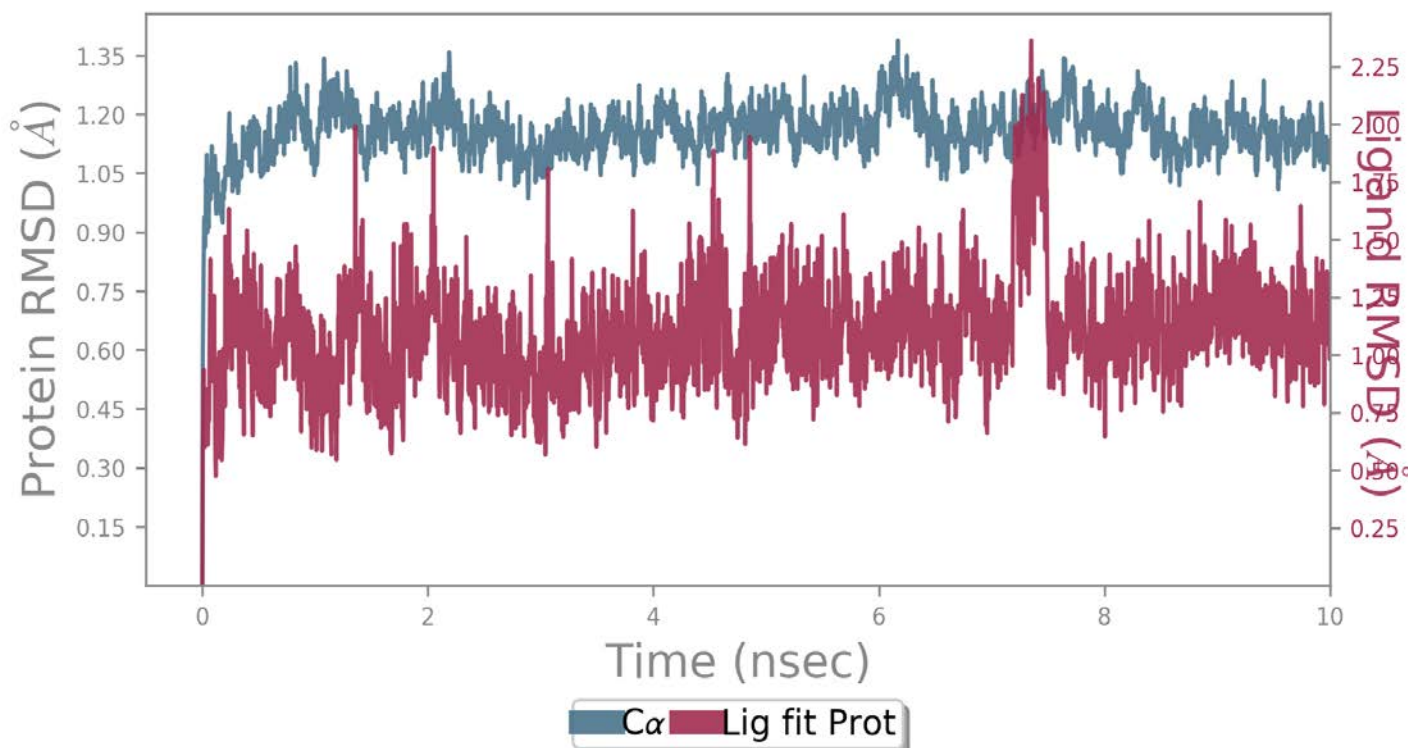

The Root Mean Square Deviation (RMSD) is used to measure the average change in displacement of a selection of atoms for a particular frame with respect to a reference frame. It is calculated for all frames in the trajectory. The RMSD for frame  $x$  is:

$$RMSD_x = \sqrt{\frac{1}{N} \sum_{i=1}^N (r'_i(t_x) - r_i(t_{ref}))^2}$$

where  $N$  is the number of atoms in the atom selection;  $t_{ref}$  is the reference time, (typically the first frame is used as the reference and it is regarded as time  $t=0$ ); and  $r'$  is the position of the selected atoms in frame  $x$  after superimposing on the reference frame, where frame  $x$  is recorded at time  $t_x$ . The procedure is repeated for every frame in the simulation trajectory.

**Protein RMSD:** The above plot shows the RMSD evolution of a protein (left Y-axis). All protein frames are first aligned on the reference frame backbone, and then the RMSD is calculated based on the atom selection. Monitoring the RMSD of the protein can give insights into its structural conformation throughout the simulation. RMSD analysis can indicate if the simulation has equilibrated — its fluctuations towards the end of the simulation are around some thermal average structure. Changes of the order of 1-3 Å are perfectly acceptable for small, globular proteins. Changes much larger than that, however, indicate that the protein is undergoing a large conformational change during the simulation. It is also important that your simulation converges — the RMSD values stabilize around a fixed value. If the RMSD of the protein is still increasing or decreasing on average at the end of the simulation, then your system has not equilibrated, and your simulation may not be long enough for rigorous analysis.

**Ligand RMSD:** Ligand RMSD (right Y-axis) indicates how stable the ligand is with respect to the protein and its binding pocket. In the above plot, 'Lig fit Prot' shows the RMSD of a ligand when the protein-ligand complex is first aligned on the protein backbone of the reference and then the RMSD of the ligand heavy atoms is measured. If the values observed are significantly larger than the RMSD of the protein, then it is likely that the ligand has diffused away from its initial binding site.

## Protein RMSF

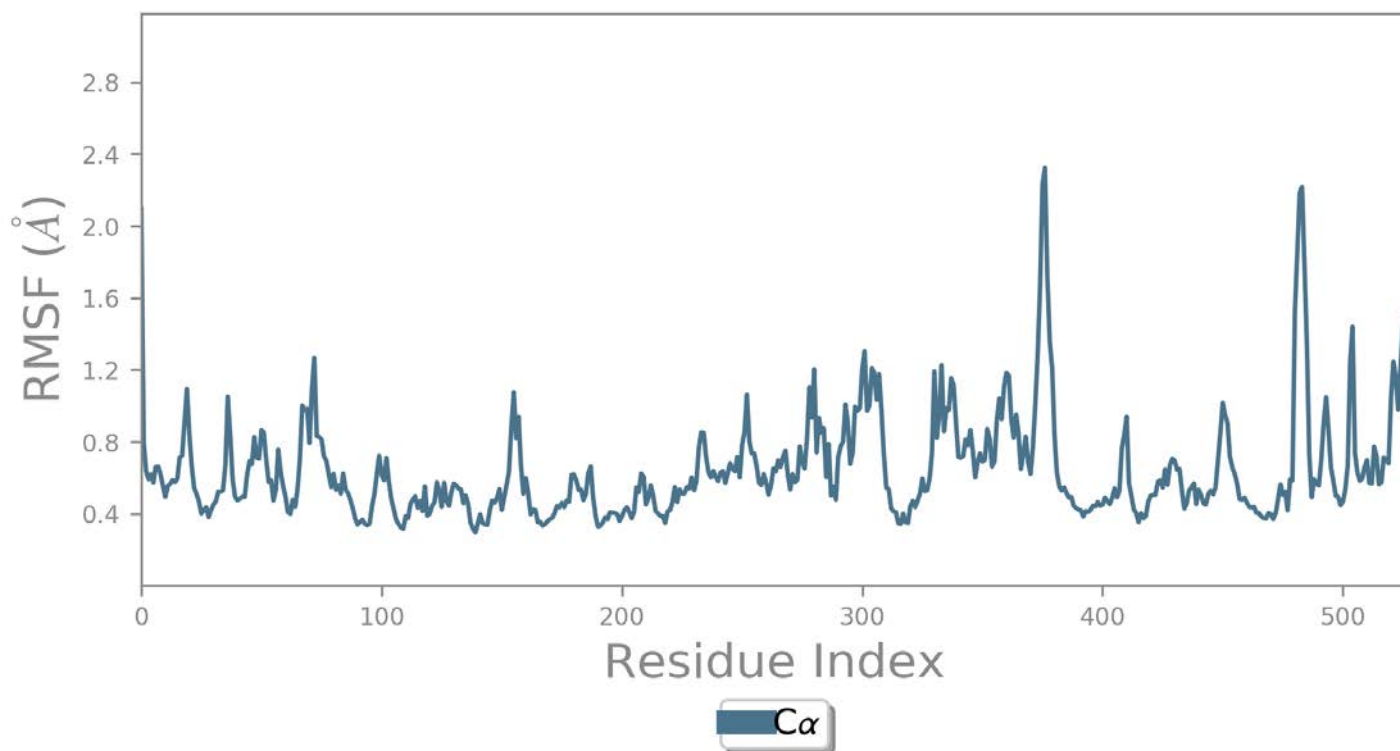

The Root Mean Square Fluctuation (RMSF) is useful for characterizing local changes along the protein chain. The RMSF for residue  $i$  is:

$$RMSF_i = \sqrt{\frac{1}{T} \sum_{t=1}^T \langle (r'_i(t)) - r_i(t_{ref})^2 \rangle}$$

where  $T$  is the trajectory time over which the RMSF is calculated,  $t_{ref}$  is the reference time,  $r_i$  is the position of residue  $i$ ;  $r'$  is the position of atoms in residue  $i$  after superposition on the reference, and the angle brackets indicate that the average of the square distance is taken over the selection of atoms in the residue.

On this plot, peaks indicate areas of the protein that fluctuate the most during the simulation. Typically you will observe that the tails ( $N$ - and  $C$ -terminal) fluctuate more than any other part of the protein. Secondary structure elements like alpha helices and beta strands are usually more rigid than the unstructured part of the protein, and thus fluctuate less than the loop regions.



## Protein Secondary Structure

% Helix  
28.19

% Strand  
13.62

% Total SSE  
41.82

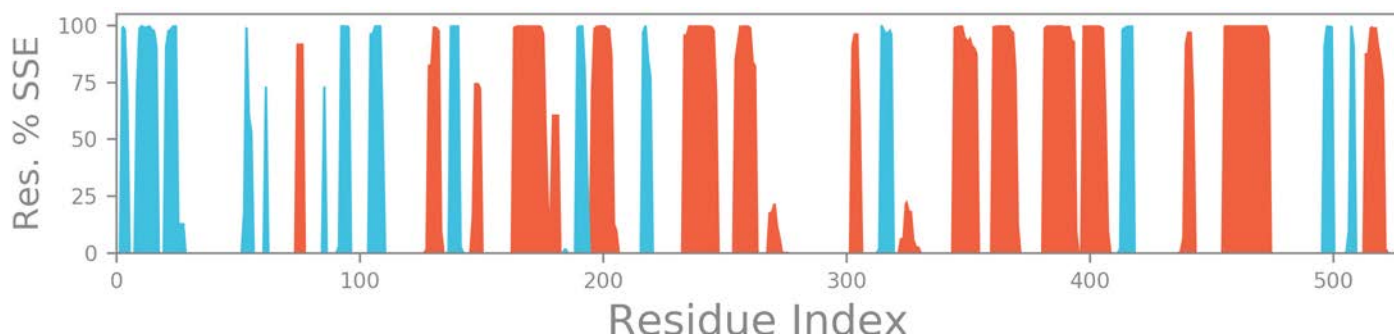

Protein secondary structure elements (SSE) like **alpha-helices** and **beta-strands** are monitored throughout the simulation. The plot above reports SSE distribution by residue index throughout the protein structure. The plot below summarizes the SSE composition for each trajectory frame over the course of the simulation, and the plot at the bottom monitors each residue and its SSE assignment over time.

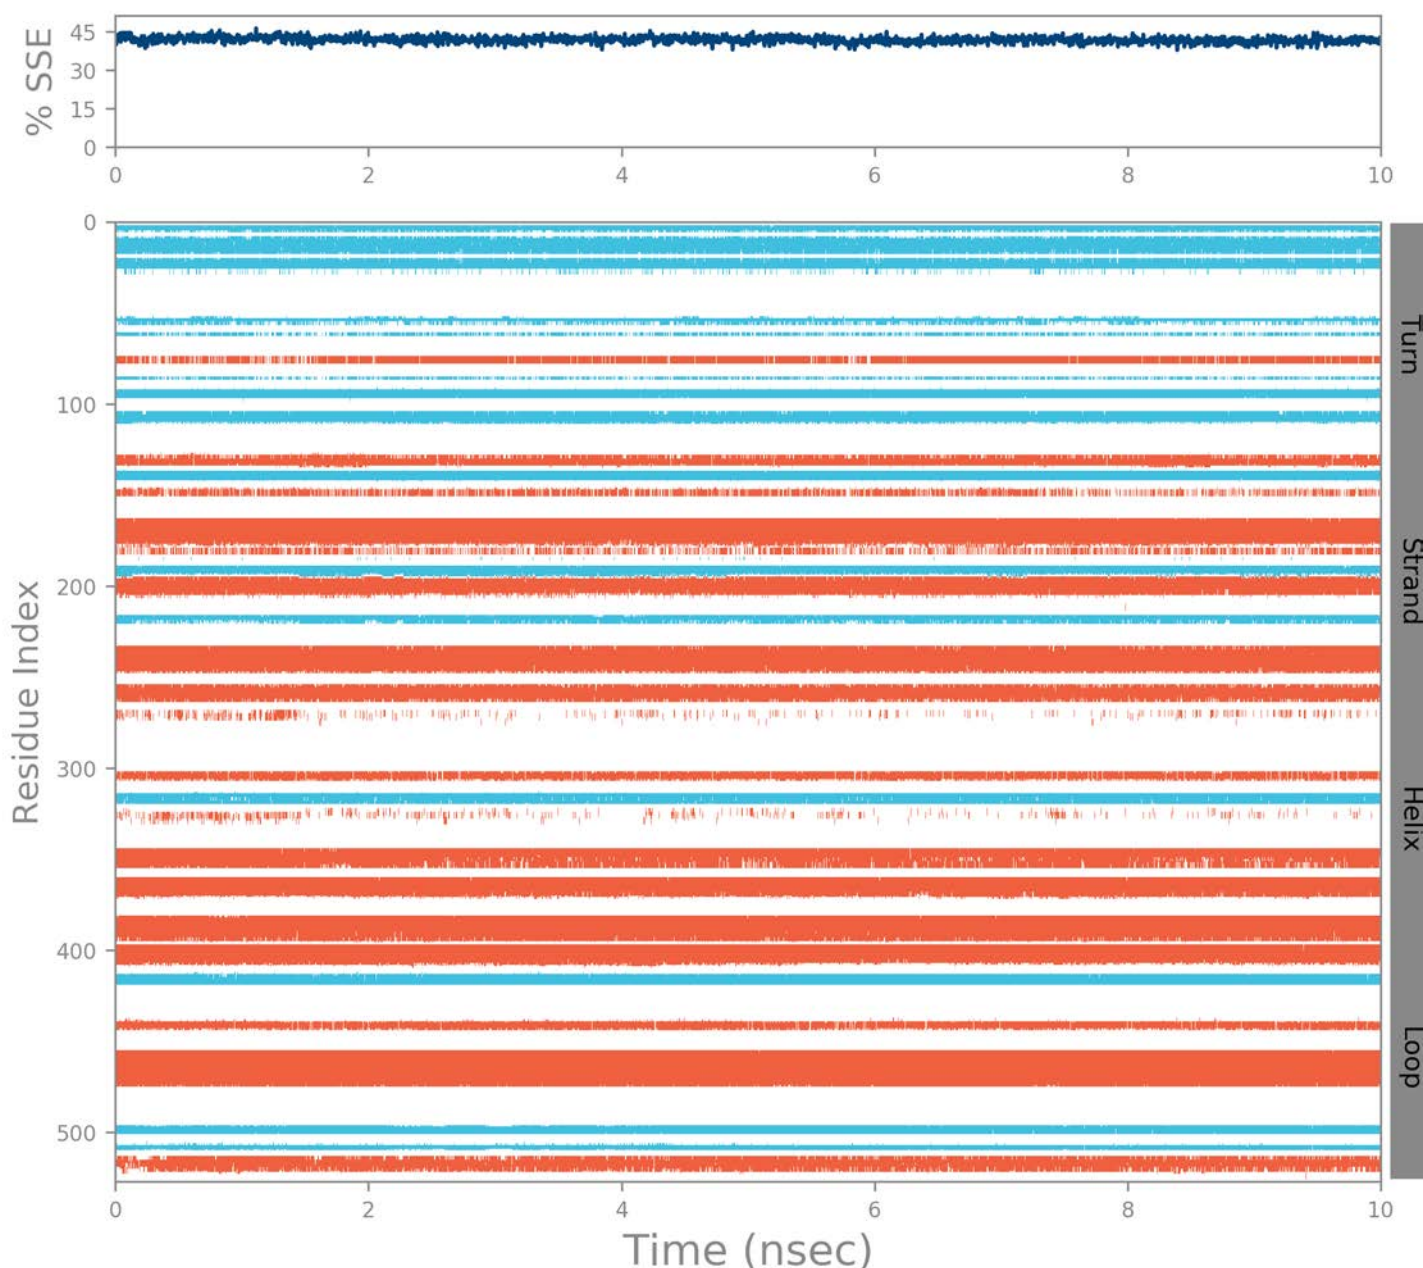

## Palmatine Ligand RMSF

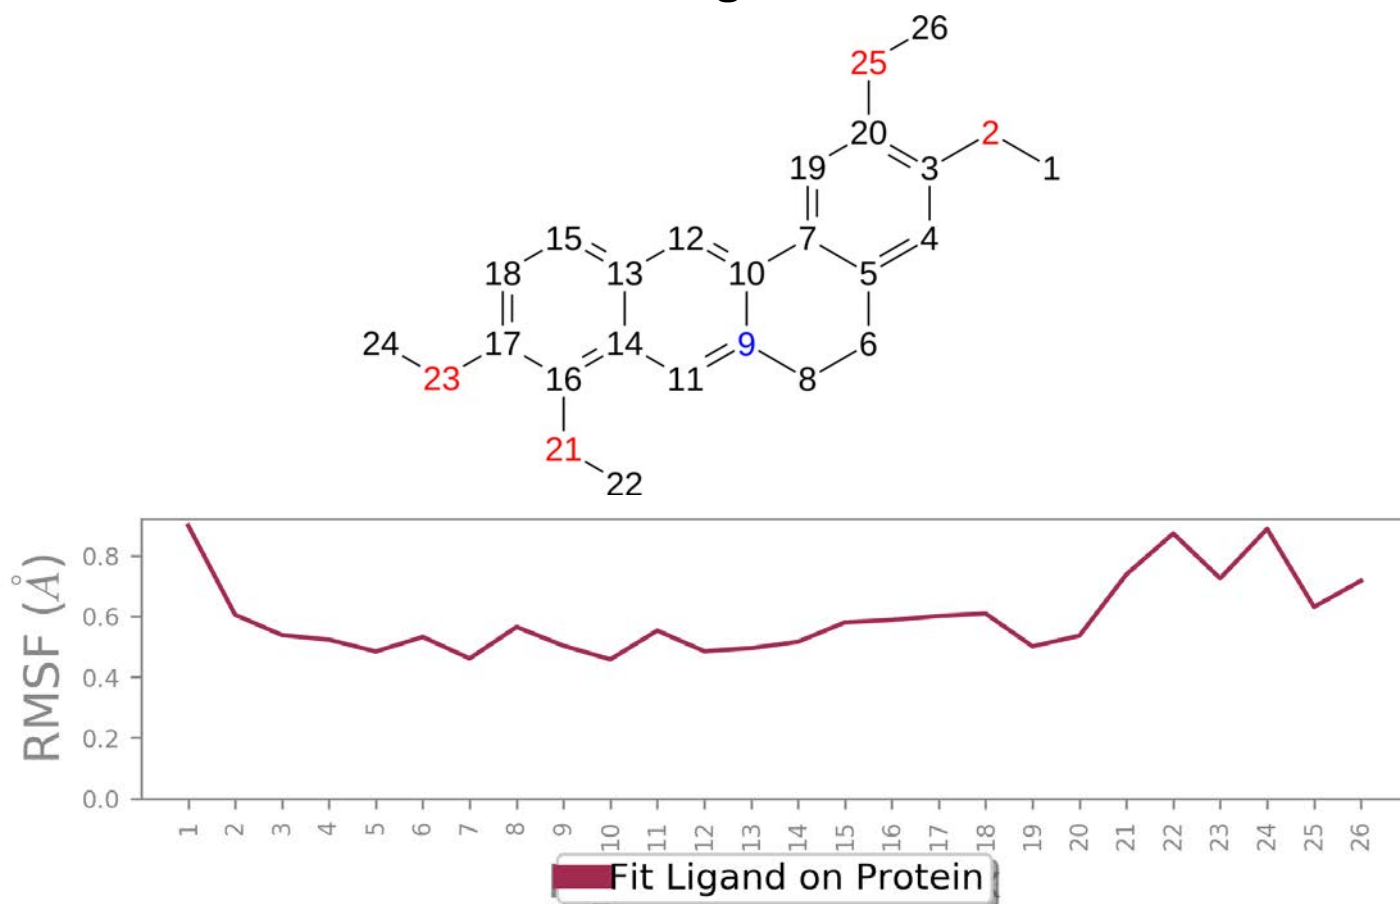

The Ligand Root Mean Square Fluctuation (L-RMSF) is useful for characterizing changes in the ligand atom positions. The RMSF for atom  $i$  is:

$$RMSF_i = \sqrt{\frac{1}{T} \sum_{t=1}^T (r'_i(t) - r_i(t_{ref}))^2}$$

where  $T$  is the trajectory time over which the RMSF is calculated,  $t_{ref}$  is the reference time (usually for the first frame, and is regarded as the zero of time);  $r$  is the position of atom  $i$  in the reference at time  $t_{ref}$  and  $r'$  is the position of atom  $i$  at time  $t$  after superposition on the reference frame.

Ligand RMSF shows the ligand's fluctuations broken down by atom, corresponding to the 2D structure in the top panel. The ligand RMSF may give you insights on how ligand fragments interact with the protein and their entropic role in the binding event. In the bottom panel, the 'Fit Ligand on Protein' line shows the ligand fluctuations, with respect to the protein. The protein-ligand complex is first aligned on the protein backbone and then the ligand RMSF is measured on the ligand heavy atoms.

## Protein-Ligand Contacts

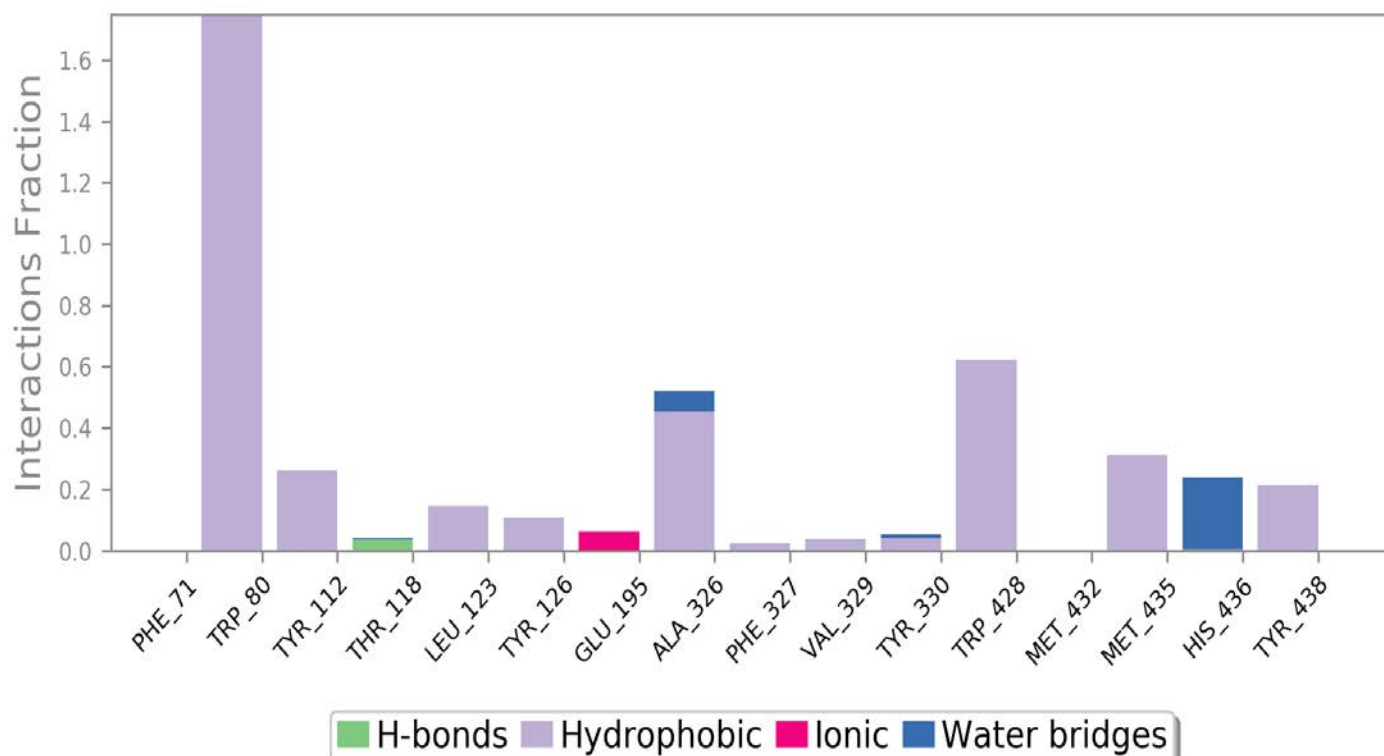

Protein interactions with the ligand can be monitored throughout the simulation. These interactions can be categorized by type and summarized, as shown in the plot above. Protein-ligand interactions (or 'contacts') are categorized into four types: Hydrogen Bonds, Hydrophobic, Ionic and Water Bridges. Each interaction type contains more specific subtypes, which can be explored through the 'Simulation Interactions Diagram' panel. The stacked bar charts are normalized over the course of the trajectory: for example, a value of 0.7 suggests that 70% of the simulation time the specific interaction is maintained. Values over 1.0 are possible as some protein residue may make multiple contacts of same subtype with the ligand.

**Hydrogen Bonds:** (H-bonds) play a significant role in ligand binding. Consideration of hydrogen-bonding properties in drug design is important because of their strong influence on drug specificity, metabolism and adsorption. Hydrogen bonds between a protein and a ligand can be further broken down into four subtypes: backbone acceptor; backbone donor; side-chain acceptor; side-chain donor.

The current geometric criteria for protein-ligand H-bond is: distance of 2.5 Å between the donor and acceptor atoms (D—H...A); a donor angle of  $\geq 120^\circ$  between the donor-hydrogen-acceptor atoms (D—H...A); and an acceptor angle of  $\geq 90^\circ$  between the hydrogen-acceptor-bonded\_atom atoms (H...A—X).

**Hydrophobic contacts:** fall into three subtypes:  $\pi$ -Cation;  $\pi$ - $\pi$ ; and Other, non-specific interactions. Generally these type of interactions involve a hydrophobic amino acid and an aromatic or aliphatic group on the ligand, but we have extended this category to also include  $\pi$ -Cation interactions.

The current geometric criteria for hydrophobic interactions is as follows:  $\pi$ -Cation — Aromatic and charged groups within 4.5 Å;  $\pi$ - $\pi$  — Two aromatic groups stacked face-to-face or face-to-edge; Other — A non-specific hydrophobic sidechain within 3.6 Å of a ligand's aromatic or aliphatic carbons.

**Ionic interactions:** or polar interactions, are between two oppositely charged atoms that are within 3.7 Å of each other and do not involve a hydrogen bond. We also monitor Protein-Metal-Ligand interactions, which are defined by a metal ion coordinated within 3.4 Å of protein's and ligand's heavy atoms (except carbon). All ionic interactions are broken down into two subtypes: those mediated by a protein backbone or side chains.

**Water Bridges:** are hydrogen-bonded protein-ligand interactions mediated by a water molecule. The hydrogen-bond geometry is slightly relaxed from the standard H-bond definition.

The current geometric criteria for a protein-water or water-ligand H-bond are: a distance of 2.8 Å between the donor and acceptor atoms (D—H...A); a donor angle of  $\geq 110^\circ$  between the donor-hydrogen-acceptor atoms (D—H...A); and an acceptor angle of  $\geq 90^\circ$  between the hydrogen-acceptor-bonded\_atom atoms (H...A—X).

## Protein-Ligand Contacts (cont.)

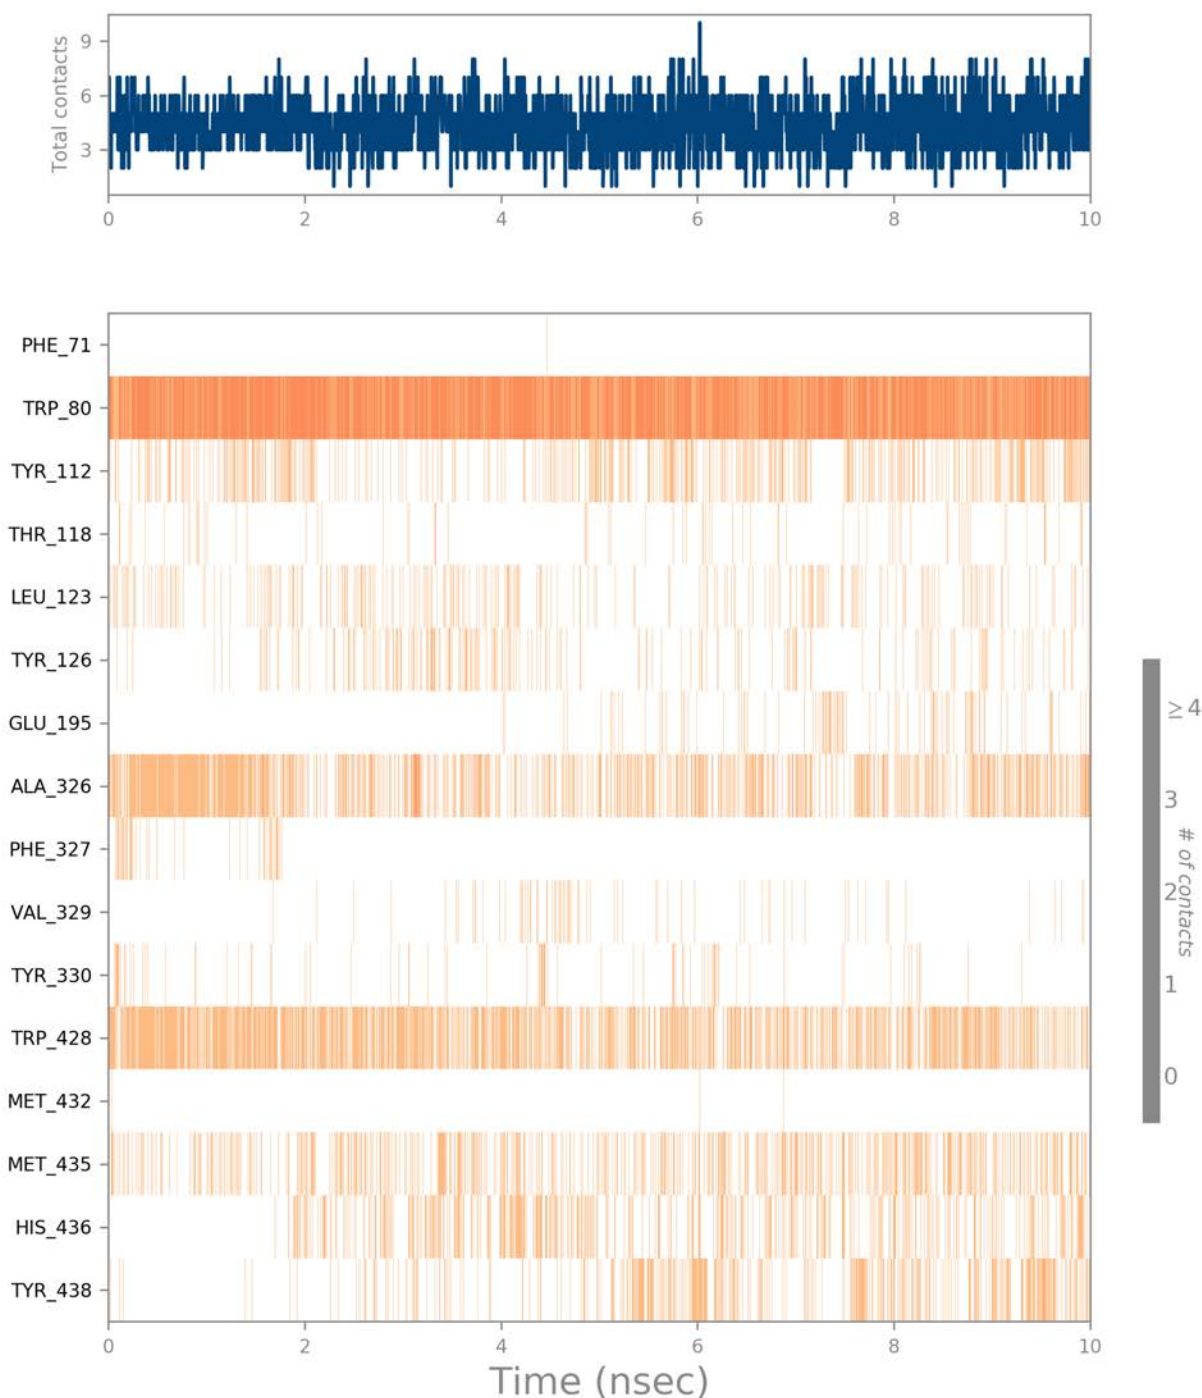

A timeline representation of the interactions and contacts (**H-bonds, Hydrophobic, Ionic, Water bridges**) summarized in the previous page. The top panel shows the total number of specific contacts the protein makes with the ligand over the course of the trajectory. The bottom panel shows which residues interact with the ligand in each trajectory frame. Some residues make more than one specific contact with the ligand, which is represented by a darker shade of orange, according to the scale to the right of the plot.



## Ligand-Protein Contacts

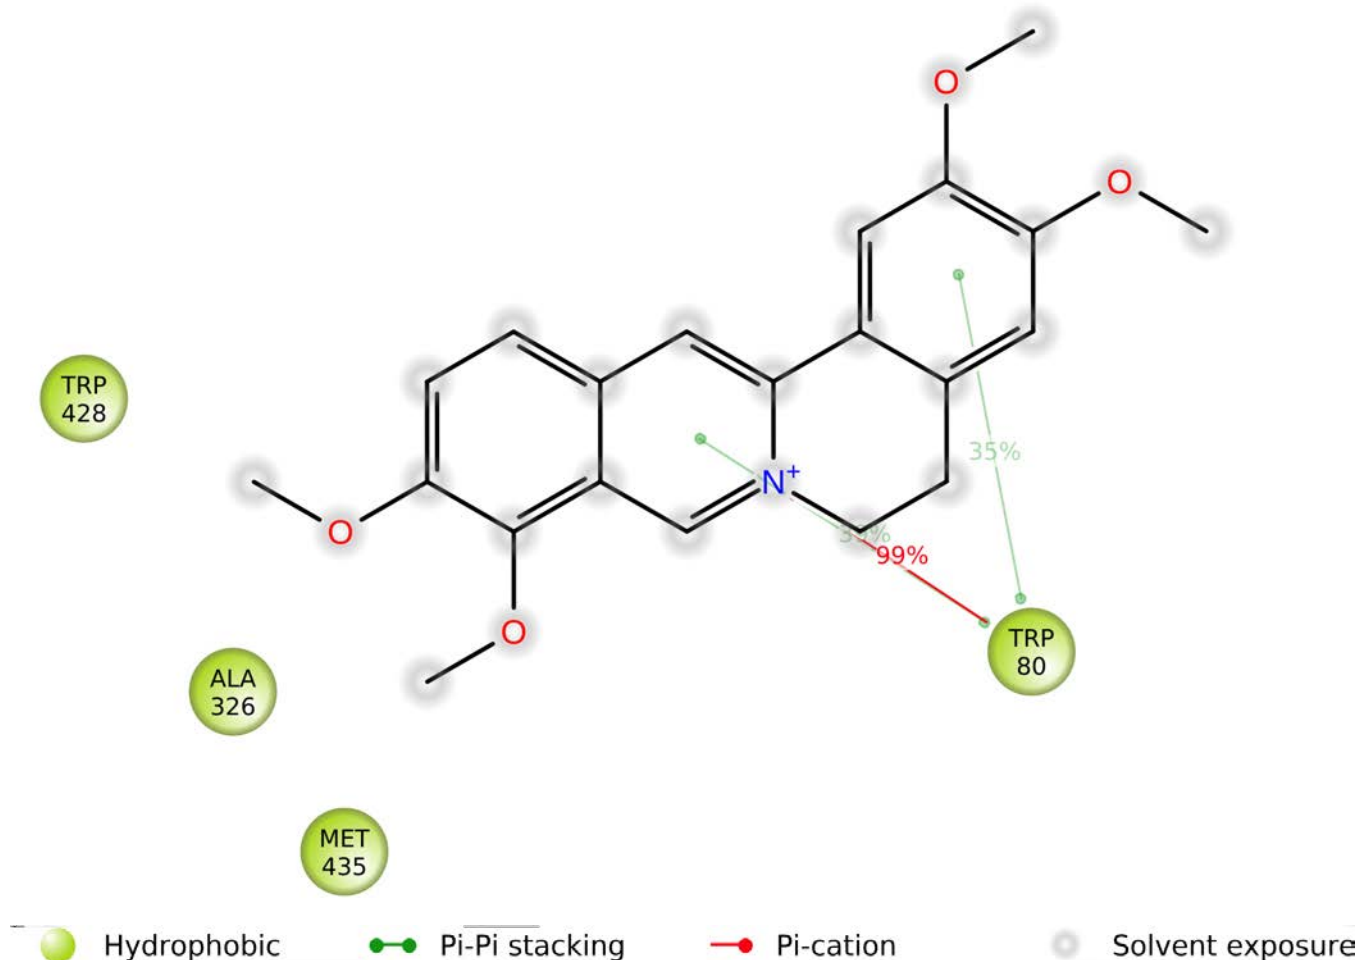

A schematic of detailed ligand atom interactions with the protein residues. Interactions that occur more than **30.0%** of the simulation time in the selected trajectory ( 0.00 through 10.00 nsec), are shown.

Note: it is possible to have interactions with >100% as some residues may have multiple interactions of a single type with the same ligand atom. For example, the ARG side chain has four H-bond donors that can all hydrogen-bond to a single H-bond acceptor.

## Ligand Torsion Profile

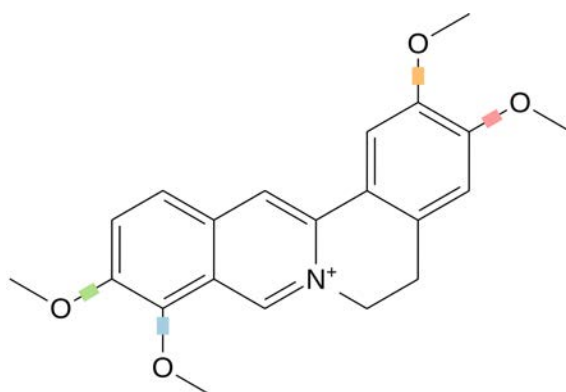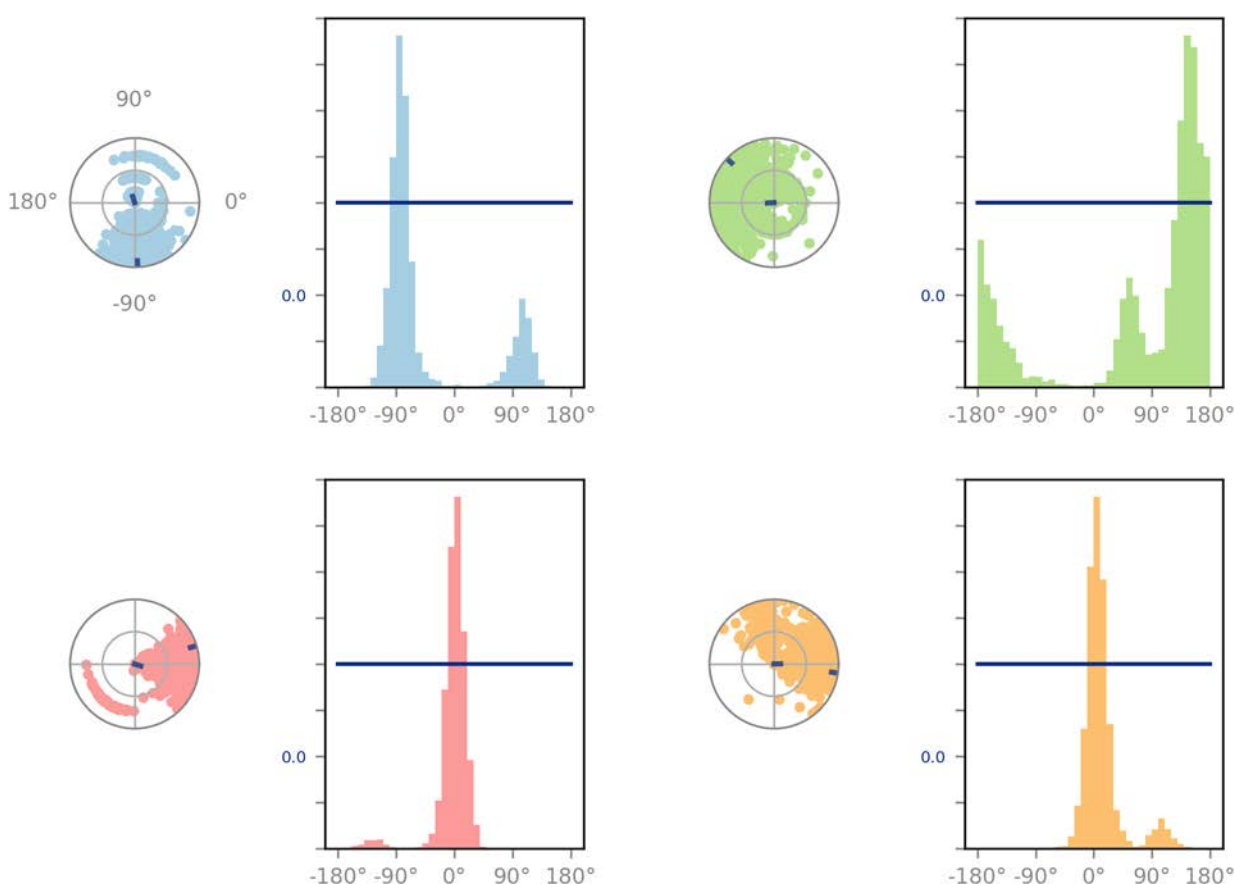

The ligand torsions plot summarizes the conformational evolution of every rotatable bond (RB) in the ligand throughout the simulation trajectory ( 0.00 through 10.00 nsec). The top panel shows the 2d schematic of a ligand with color-coded rotatable bonds. Each rotatable bond torsion is accompanied by a dial plot and bar plots of the same color.

Dial (or radial) plots describe the conformation of the torsion throughout the course of the simulation. The beginning of the simulation is in the center of the radial plot and the time evolution is plotted radially outwards.

The bar plots summarize the data on the dial plots, by showing the probability density of the torsion. If torsional potential information is available, the plot also shows the potential of the rotatable bond (by summing the potential of the related torsions). The values of the potential are on the left Y-axis of the chart, and are expressed in *kcal/mol*. Looking at the histogram and torsion potential relationships may give insights into the conformational strain the ligand undergoes to maintain a protein-bound conformation.

## Ligand Properties

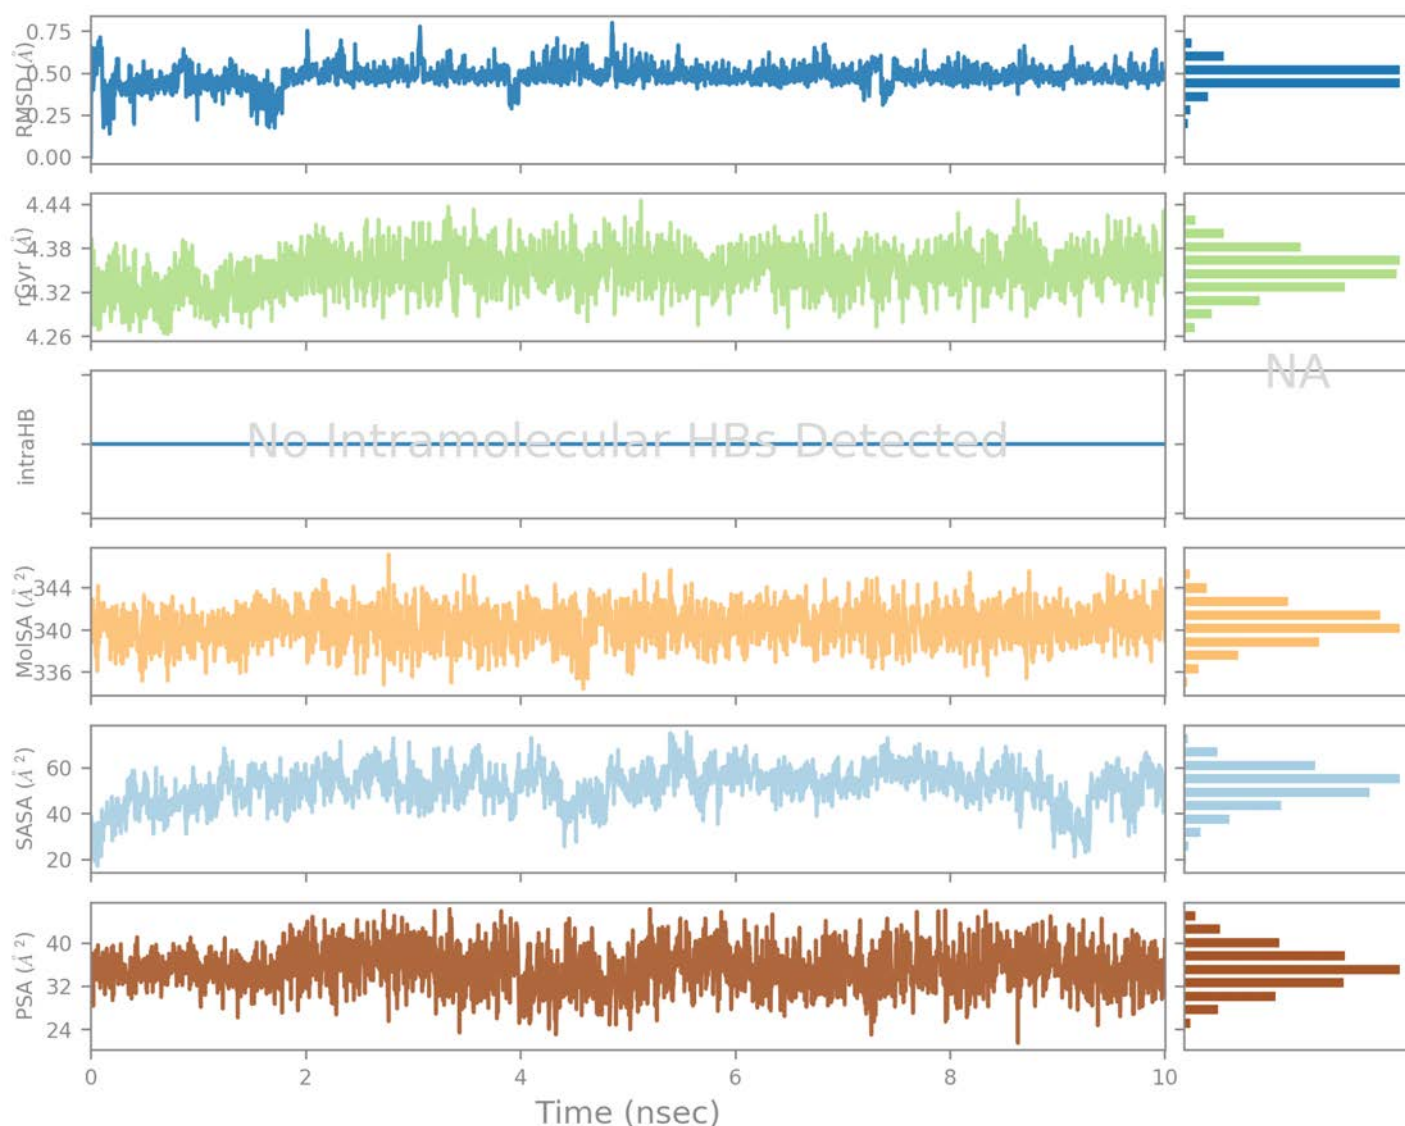

**Ligand RMSD:** Root mean square deviation of a ligand with respect to the reference conformation (typically the first frame is used as the reference and it is regarded as time  $t=0$ ).

**Radius of Gyration (rGyr):** Measures the 'extendedness' of a ligand, and is equivalent to its principal moment of inertia.

**Intramolecular Hydrogen Bonds (intraHB):** Number of internal hydrogen bonds (HB) within a ligand molecule.

**Molecular Surface Area (MolSA):** Molecular surface calculation with 1.4 Å probe radius. This value is equivalent to a van der Waals surface area.

**Solvent Accessible Surface Area (SASA):** Surface area of a molecule accessible by a water molecule.

**Polar Surface Area (PSA):** Solvent accessible surface area in a molecule contributed only by oxygen and nitrogen atoms.



# Report S11

## MD Simulation Report on BChE - 5-N-Methylmaytenine Interactions

### Simulation Details

Jobname: md\_job\_6EP4\_4-dock-1  
Entry title: 6EP4\_4-dock-1

| CPU # | Job Type | Ensemble | Temp. [K] | Sim. Time [ns] | # Atoms | # Waters | Charge |
|-------|----------|----------|-----------|----------------|---------|----------|--------|
| 1     | mdsim    | NPT      | 300.0     | 10.005         | 51011   | 14184    | 0      |

### Protein Information

| Tot. Residues | Prot. Chain(s) | Res. in Chain(s)  | # Atoms | # Heavy Atoms | Charge |
|---------------|----------------|-------------------|---------|---------------|--------|
| 527           | 'NoChainId'    | ict_values([527]) | 8313    | 4203          | +2     |

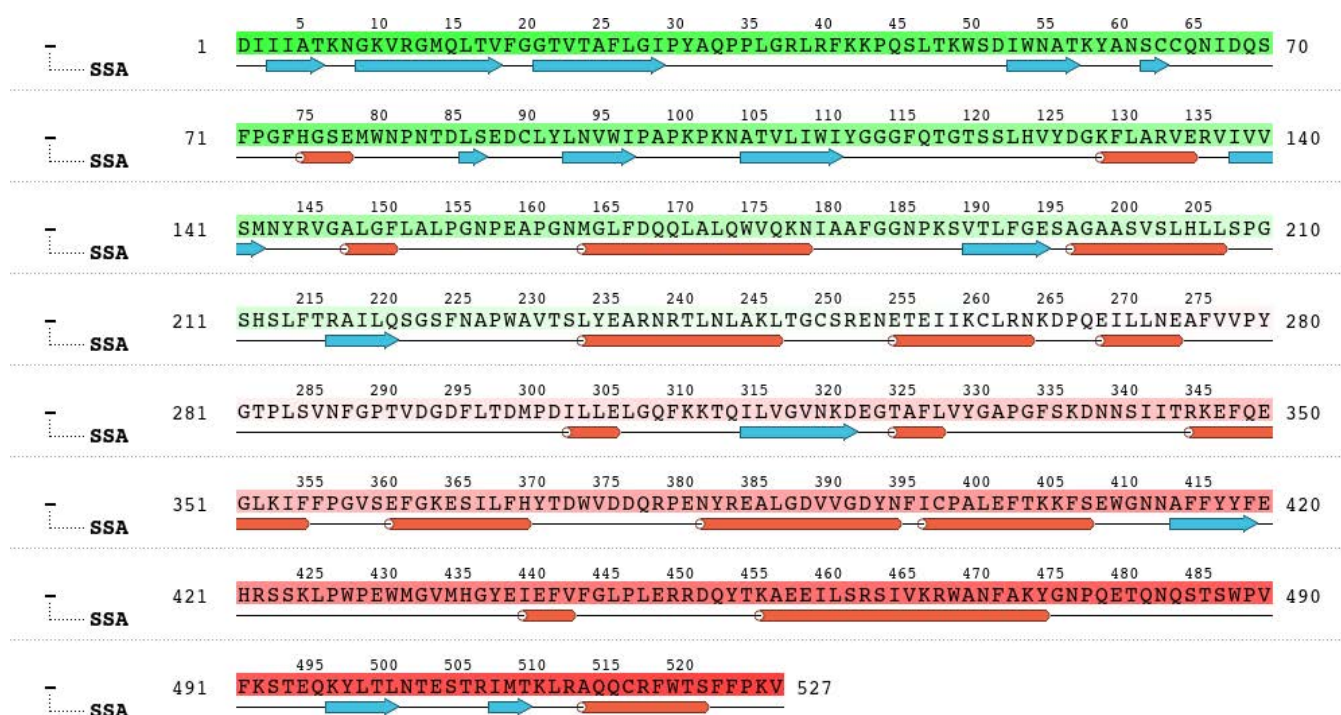

### Ligand Information

|                    |                                                      |
|--------------------|------------------------------------------------------|
| SMILES             | c1cccc1\C=C\C(=O)NCCCC[N@H+](C)CCCNC(=O)/C=C/c2cccc2 |
| PDB Name           | 'UNK'                                                |
| Num. of Atoms      | 65 (total) 31 (heavy)                                |
| Atomic Mass        | 420.580 au                                           |
| Charge             | +1                                                   |
| Mol. Formula       | C26H34N3O2                                           |
| Num. of Fragments  | 9                                                    |
| Num. of Rot. Bonds | 15                                                   |

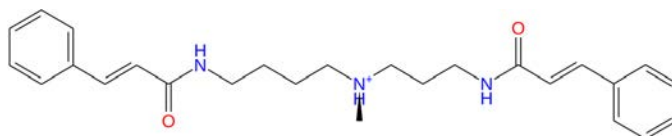

### Counter Ion/Salt Information

| Type | Num. | Concentration [mM] | Total Charge |
|------|------|--------------------|--------------|
| Cl   | 42   | 53.838             | -42          |
| Na   | 39   | 49.992             | +39          |

## Protein-Ligand RMSD

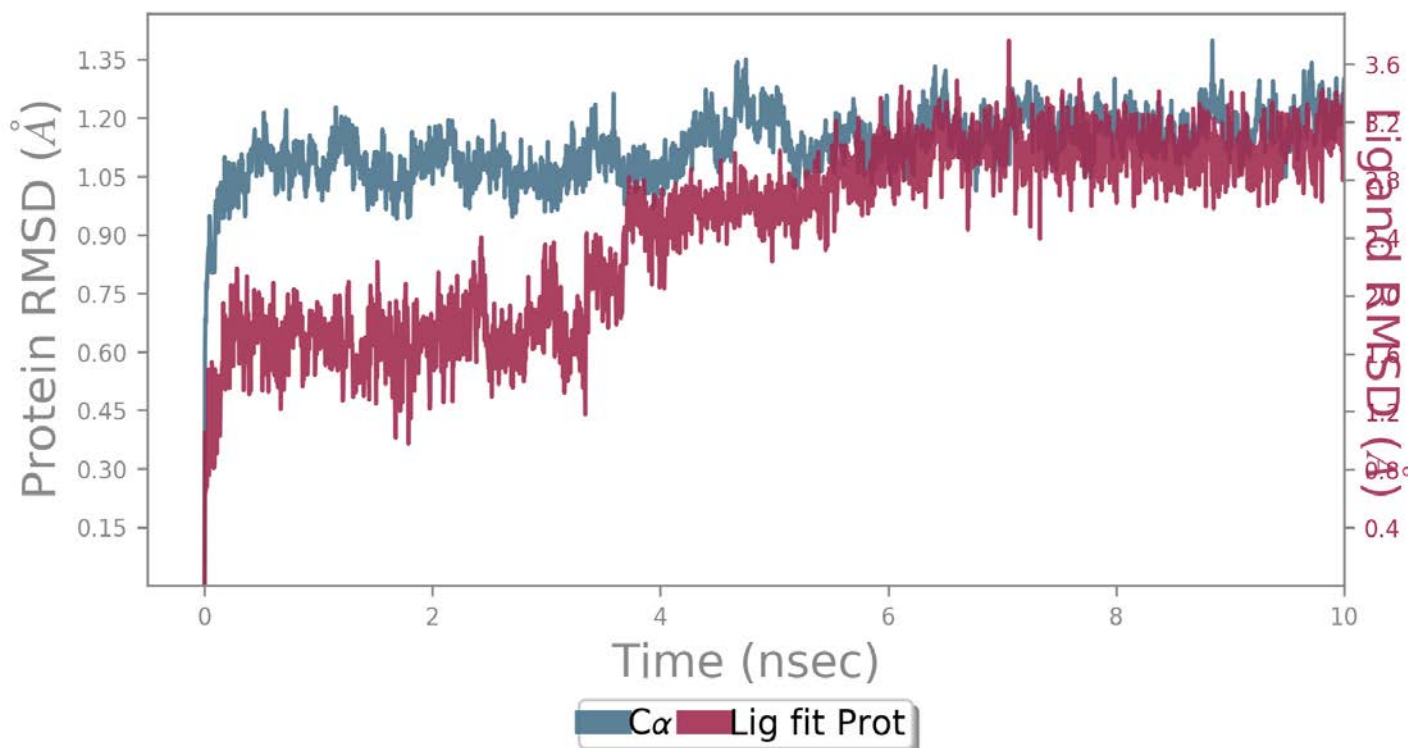

The Root Mean Square Deviation (RMSD) is used to measure the average change in displacement of a selection of atoms for a particular frame with respect to a reference frame. It is calculated for all frames in the trajectory. The RMSD for frame  $x$  is:

$$RMSD_x = \sqrt{\frac{1}{N} \sum_{i=1}^N (r'_i(t_x) - r_i(t_{ref}))^2}$$

where  $N$  is the number of atoms in the atom selection;  $t_{ref}$  is the reference time, (typically the first frame is used as the reference and it is regarded as time  $t=0$ ); and  $r'$  is the position of the selected atoms in frame  $x$  after superimposing on the reference frame, where frame  $x$  is recorded at time  $t_x$ . The procedure is repeated for every frame in the simulation trajectory.

**Protein RMSD:** The above plot shows the RMSD evolution of a protein (left Y-axis). All protein frames are first aligned on the reference frame backbone, and then the RMSD is calculated based on the atom selection. Monitoring the RMSD of the protein can give insights into its structural conformation throughout the simulation. RMSD analysis can indicate if the simulation has equilibrated — its fluctuations towards the end of the simulation are around some thermal average structure. Changes of the order of 1-3 Å are perfectly acceptable for small, globular proteins. Changes much larger than that, however, indicate that the protein is undergoing a large conformational change during the simulation. It is also important that your simulation converges — the RMSD values stabilize around a fixed value. If the RMSD of the protein is still increasing or decreasing on average at the end of the simulation, then your system has not equilibrated, and your simulation may not be long enough for rigorous analysis.

**Ligand RMSD:** Ligand RMSD (right Y-axis) indicates how stable the ligand is with respect to the protein and its binding pocket. In the above plot, 'Lig fit Prot' shows the RMSD of a ligand when the protein-ligand complex is first aligned on the protein backbone of the reference and then the RMSD of the ligand heavy atoms is measured. If the values observed are significantly larger than the RMSD of the protein, then it is likely that the ligand has diffused away from its initial binding site.

## Protein RMSF

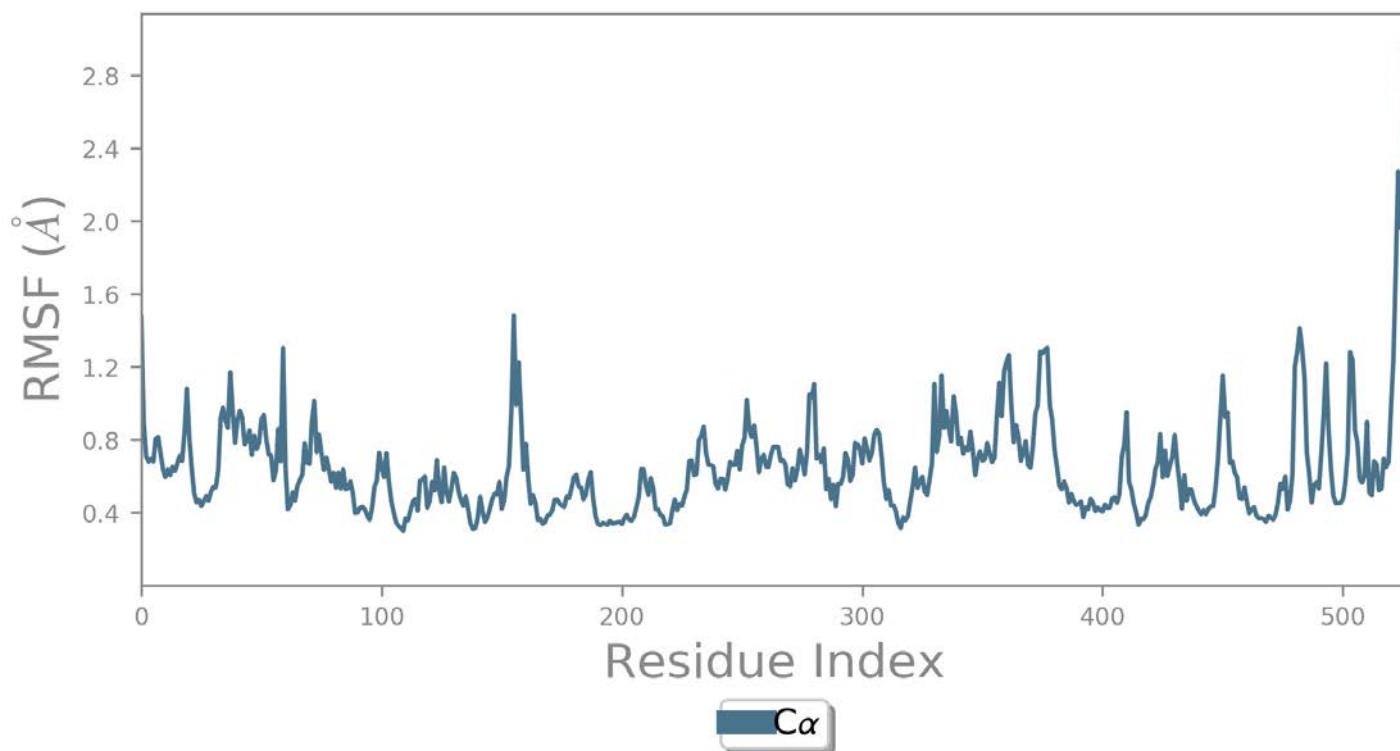

The Root Mean Square Fluctuation (RMSF) is useful for characterizing local changes along the protein chain. The RMSF for residue  $i$  is:

$$RMSF_i = \sqrt{\frac{1}{T} \sum_{t=1}^T \langle (r'_i(t)) - r_i(t_{ref})^2 \rangle}$$

where  $T$  is the trajectory time over which the RMSF is calculated,  $t_{ref}$  is the reference time,  $r_i$  is the position of residue  $i$ ;  $r'$  is the position of atoms in residue  $i$  after superposition on the reference, and the angle brackets indicate that the average of the square distance is taken over the selection of atoms in the residue.

On this plot, peaks indicate areas of the protein that fluctuate the most during the simulation. Typically you will observe that the tails ( $N$ - and  $C$ -terminal) fluctuate more than any other part of the protein. Secondary structure elements like alpha helices and beta strands are usually more rigid than the unstructured part of the protein, and thus fluctuate less than the loop regions.



## Protein Secondary Structure

% Helix  
28.38

% Strand  
13.66

% Total SSE  
42.03

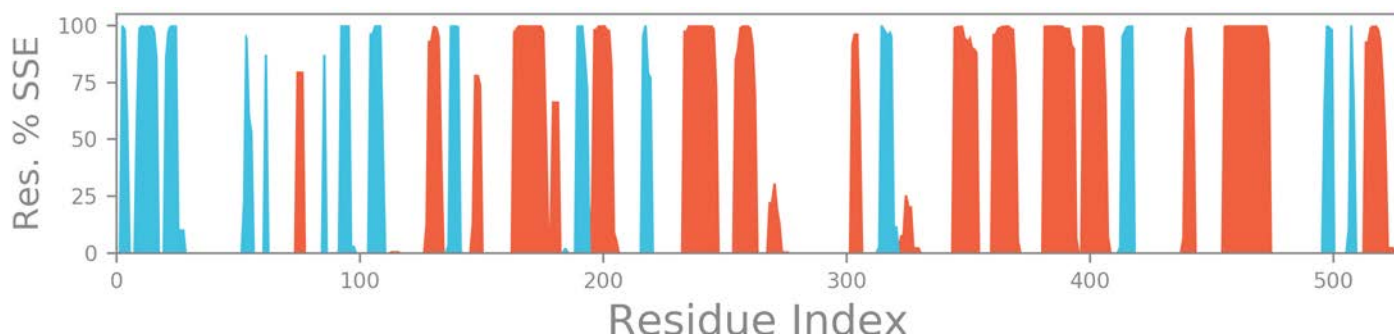

Protein secondary structure elements (SSE) like **alpha-helices** and **beta-strands** are monitored throughout the simulation. The plot above reports SSE distribution by residue index throughout the protein structure. The plot below summarizes the SSE composition for each trajectory frame over the course of the simulation, and the plot at the bottom monitors each residue and its SSE assignment over time.

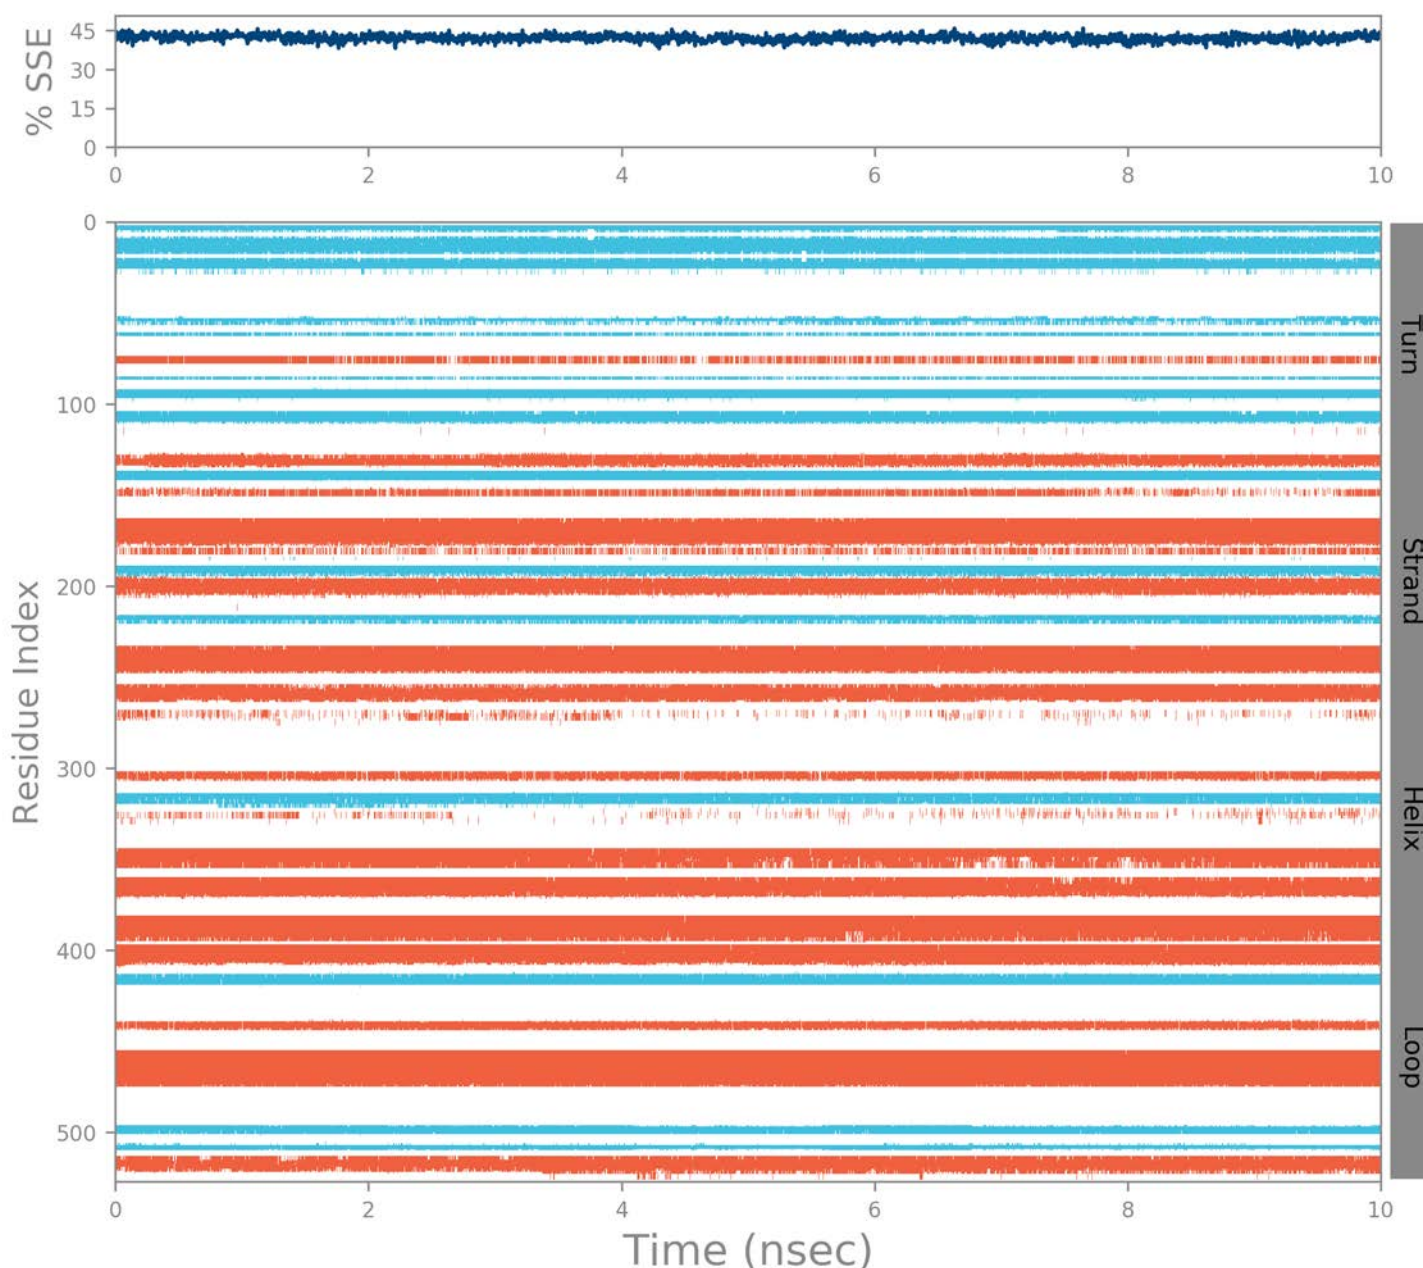

## RMSF of 5-*N*-Methylmaitenine Ligand

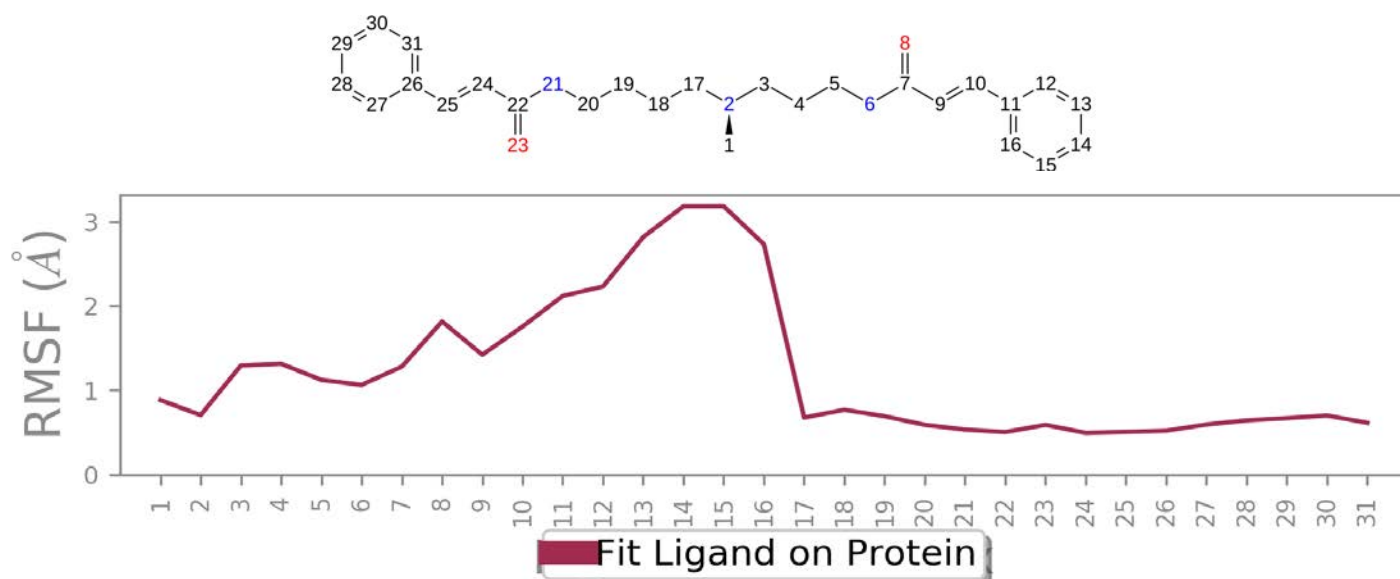

The Ligand Root Mean Square Fluctuation (L-RMSF) is useful for characterizing changes in the ligand atom positions. The RMSF for atom  $i$  is:

$$RMSF_i = \sqrt{\frac{1}{T} \sum_{t=1}^T (r'_i(t) - r_i(t_{ref}))^2}$$

where  $T$  is the trajectory time over which the RMSF is calculated,  $t_{ref}$  is the reference time (usually for the first frame, and is regarded as the zero of time);  $r$  is the position of atom  $i$  in the reference at time  $t_{ref}$  and  $r'$  is the position of atom  $i$  at time  $t$  after superposition on the reference frame.

Ligand RMSF shows the ligand's fluctuations broken down by atom, corresponding to the 2D structure in the top panel. The ligand RMSF may give you insights on how ligand fragments interact with the protein and their entropic role in the binding event. In the bottom panel, the 'Fit Ligand on Protein' line shows the ligand fluctuations, with respect to the protein. The protein-ligand complex is first aligned on the protein backbone and then the ligand RMSF is measured on the ligand heavy atoms.

## Protein-Ligand Contacts

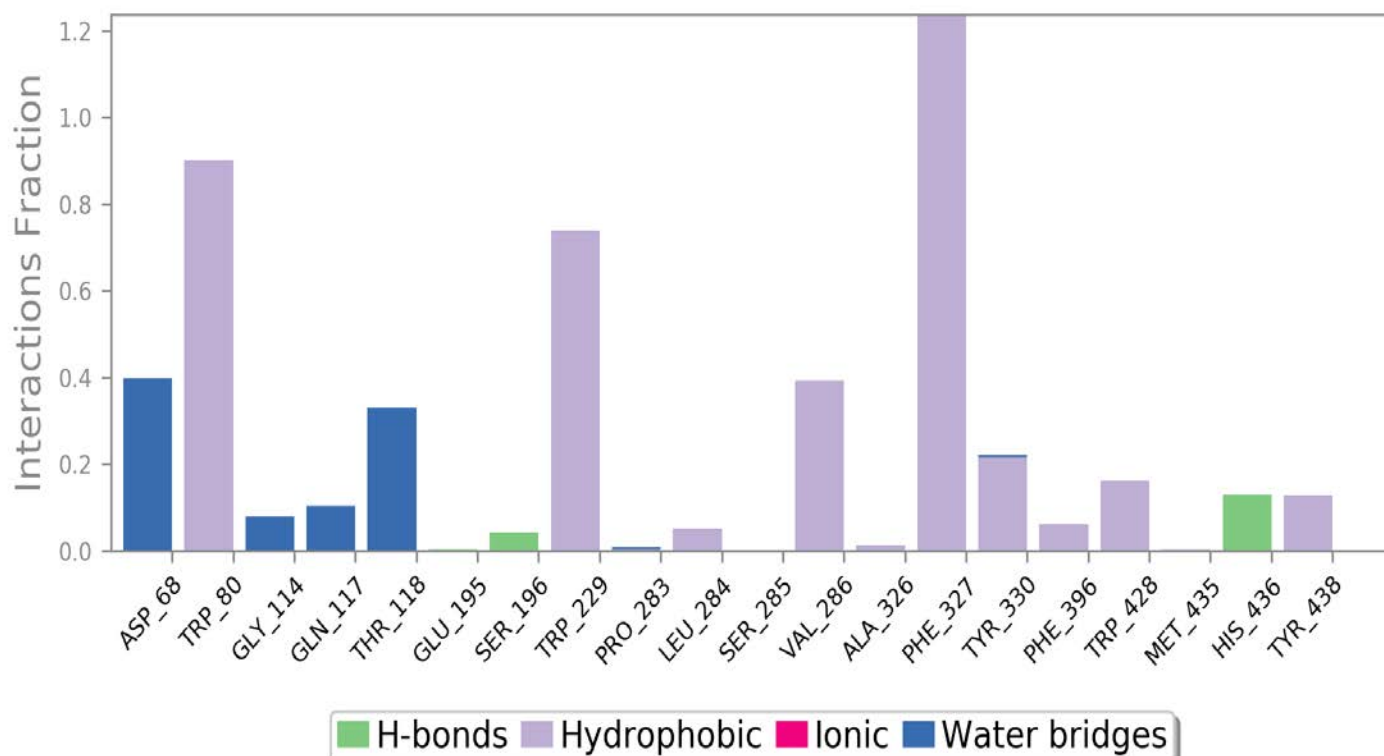

Protein interactions with the ligand can be monitored throughout the simulation. These interactions can be categorized by type and summarized, as shown in the plot above. Protein-ligand interactions (or 'contacts') are categorized into four types: Hydrogen Bonds, Hydrophobic, Ionic and Water Bridges. Each interaction type contains more specific subtypes, which can be explored through the 'Simulation Interactions Diagram' panel. The stacked bar charts are normalized over the course of the trajectory: for example, a value of 0.7 suggests that 70% of the simulation time the specific interaction is maintained. Values over 1.0 are possible as some protein residue may make multiple contacts of same subtype with the ligand.

**Hydrogen Bonds:** (H-bonds) play a significant role in ligand binding. Consideration of hydrogen-bonding properties in drug design is important because of their strong influence on drug specificity, metabolism and adsorption. Hydrogen bonds between a protein and a ligand can be further broken down into four subtypes: backbone acceptor; backbone donor; side-chain acceptor; side-chain donor.

The current geometric criteria for protein-ligand H-bond is: distance of 2.5 Å between the donor and acceptor atoms (D—H...A); a donor angle of  $\geq 120^\circ$  between the donor-hydrogen-acceptor atoms (D—H...A); and an acceptor angle of  $\geq 90^\circ$  between the hydrogen-acceptor-bonded\_atom atoms (H...A—X).

**Hydrophobic contacts:** fall into three subtypes:  $\pi$ -Cation;  $\pi$ - $\pi$ ; and Other, non-specific interactions. Generally these type of interactions involve a hydrophobic amino acid and an aromatic or aliphatic group on the ligand, but we have extended this category to also include  $\pi$ -Cation interactions.

The current geometric criteria for hydrophobic interactions is as follows:  $\pi$ -Cation — Aromatic and charged groups within 4.5 Å;  $\pi$ - $\pi$  — Two aromatic groups stacked face-to-face or face-to-edge; Other — A non-specific hydrophobic sidechain within 3.6 Å of a ligand's aromatic or aliphatic carbons.

**Ionic interactions:** or polar interactions, are between two oppositely charged atoms that are within 3.7 Å of each other and do not involve a hydrogen bond. We also monitor Protein-Metal-Ligand interactions, which are defined by a metal ion coordinated within 3.4 Å of protein's and ligand's heavy atoms (except carbon). All ionic interactions are broken down into two subtypes: those mediated by a protein backbone or side chains.

**Water Bridges:** are hydrogen-bonded protein-ligand interactions mediated by a water molecule. The hydrogen-bond geometry is slightly relaxed from the standard H-bond definition.

The current geometric criteria for a protein-water or water-ligand H-bond are: a distance of 2.8 Å between the donor and acceptor atoms (D—H...A); a donor angle of  $\geq 110^\circ$  between the donor-hydrogen-acceptor atoms (D—H...A); and an acceptor angle of  $\geq 90^\circ$  between the hydrogen-acceptor-bonded\_atom atoms (H...A—X).

## Protein-Ligand Contacts (cont.)

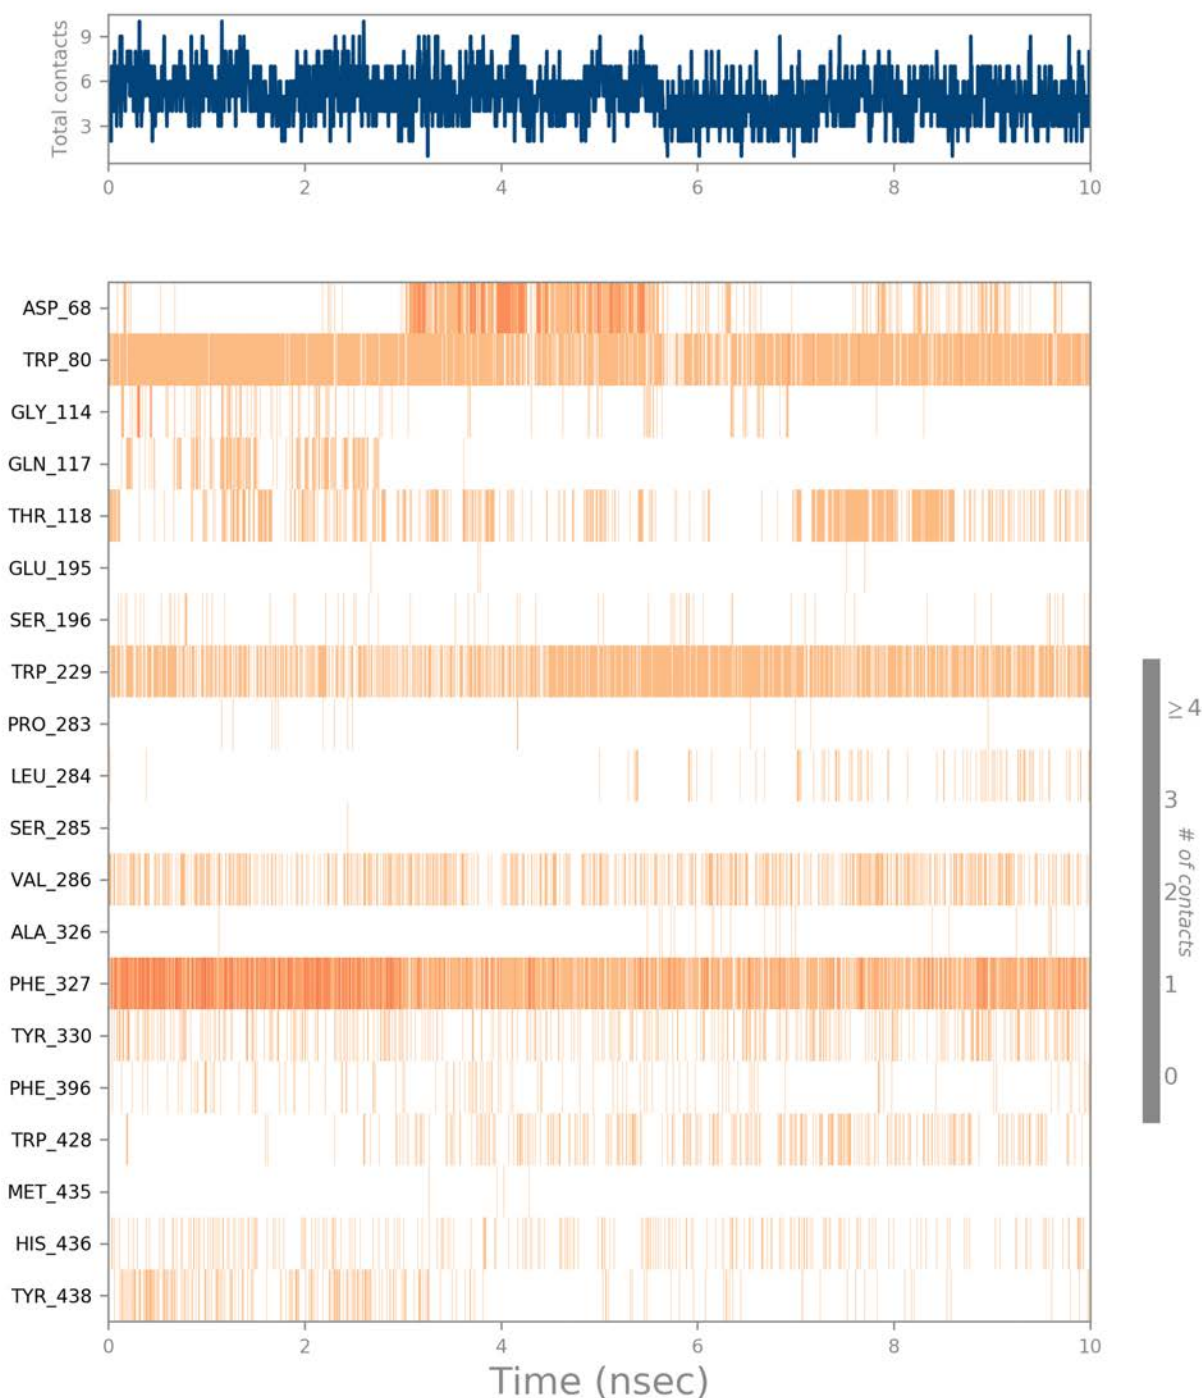

A timeline representation of the interactions and contacts (**H-bonds, Hydrophobic, Ionic, Water bridges**) summarized in the previous page. The top panel shows the total number of specific contacts the protein makes with the ligand over the course of the trajectory. The bottom panel shows which residues interact with the ligand in each trajectory frame. Some residues make more than one specific contact with the ligand, which is represented by a darker shade of orange, according to the scale to the right of the plot.



## Ligand-Protein Contacts

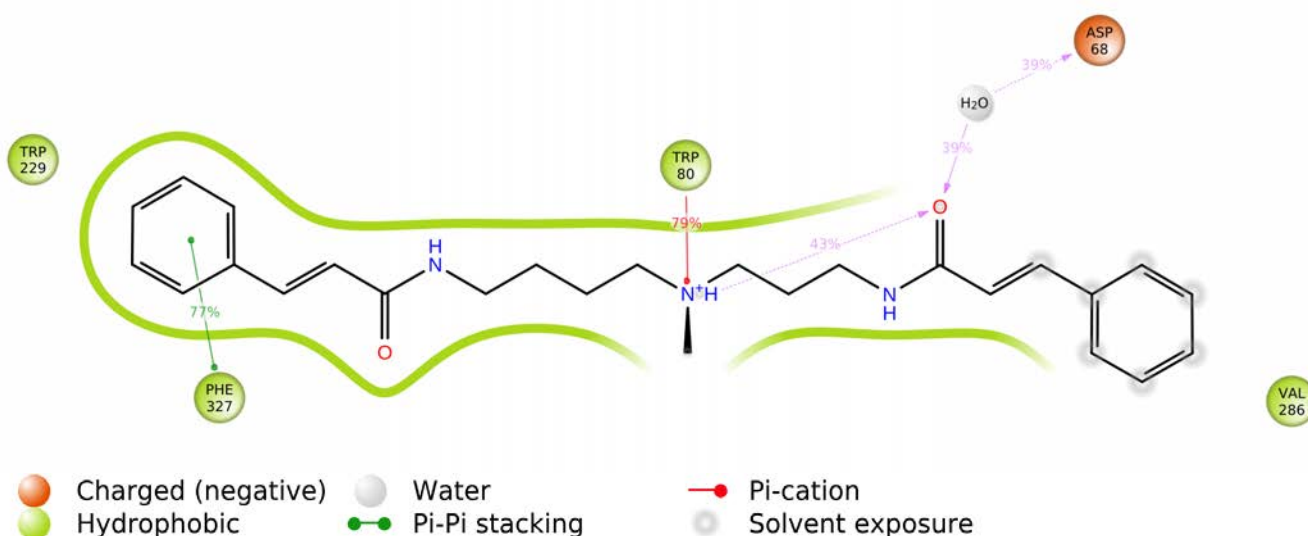

A schematic of detailed ligand atom interactions with the protein residues. Interactions that occur more than **30.0%** of the simulation time in the selected trajectory ( 0.00 through 10.00 nsec), are shown.

Note: it is possible to have interactions with >100% as some residues may have multiple interactions of a single type with the same ligand atom. For example, the ARG side chain has four H-bond donors that can all hydrogen-bond to a single H-bond acceptor.

## Ligand Torsion Profile

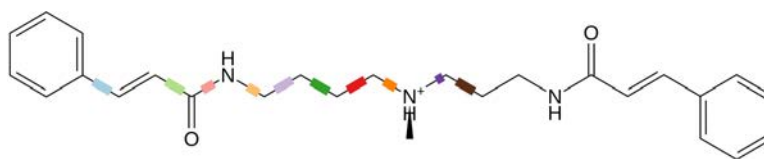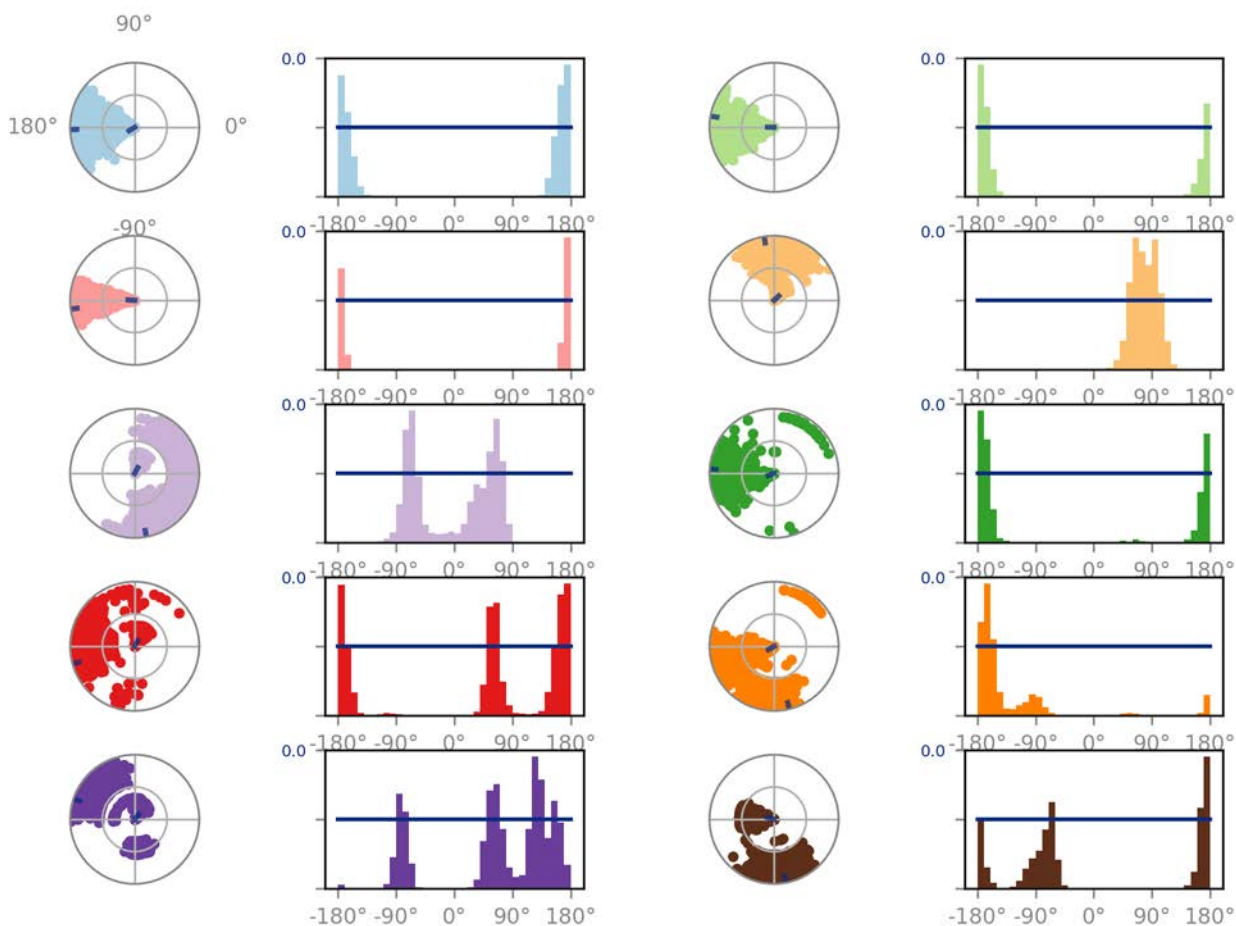

## Ligand Torsion Profile (cont.)

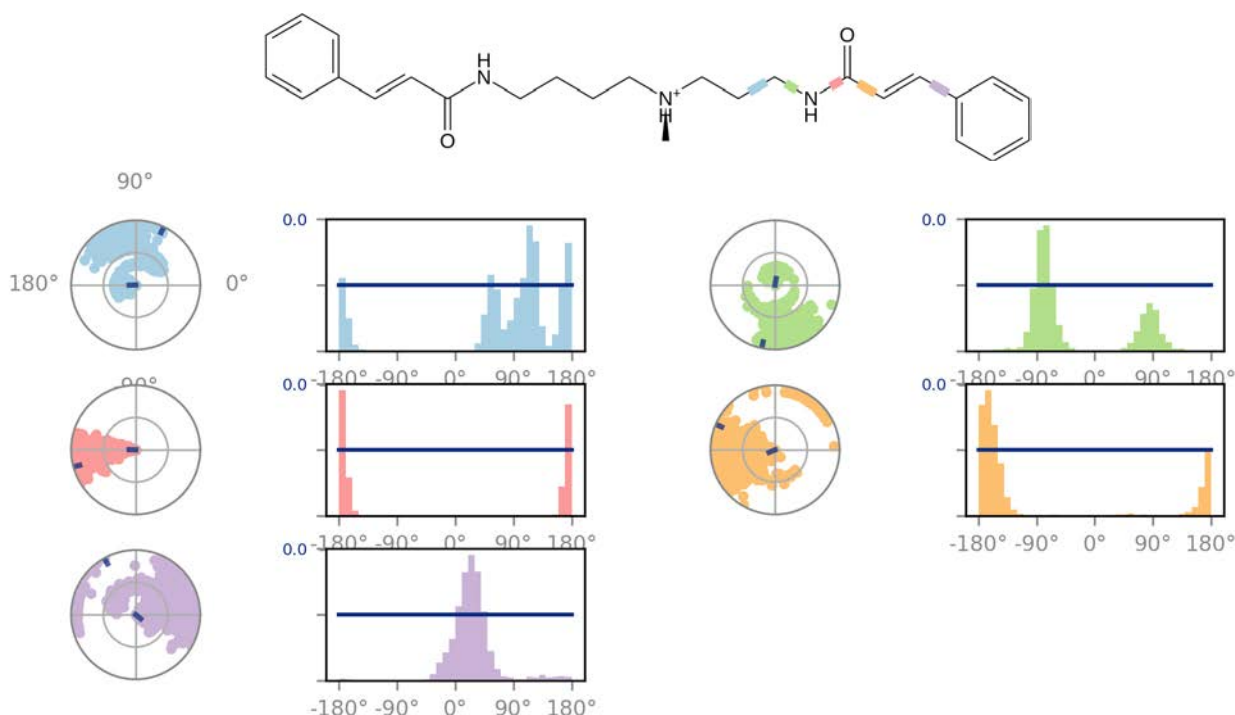

The ligand torsions plot summarizes the conformational evolution of every rotatable bond (RB) in the ligand throughout the simulation trajectory ( 0.00 through 10.00 nsec). The top panel shows the 2d schematic of a ligand with color-coded rotatable bonds. Each rotatable bond torsion is accompanied by a dial plot and bar plots of the same color.

Dial (or radial) plots describe the conformation of the torsion throughout the course of the simulation. The beginning of the simulation is in the center of the radial plot and the time evolution is plotted radially outwards.

The bar plots summarize the data on the dial plots, by showing the probability density of the torsion. If torsional potential information is available, the plot also shows the potential of the rotatable bond (by summing the potential of the related torsions). The values of the potential are on the left Y-axis of the chart, and are expressed in *kcal/mol*. Looking at the histogram and torsion potential relationships may give insights into the conformational strain the ligand undergoes to maintain a protein-bound conformation.

## Ligand Properties

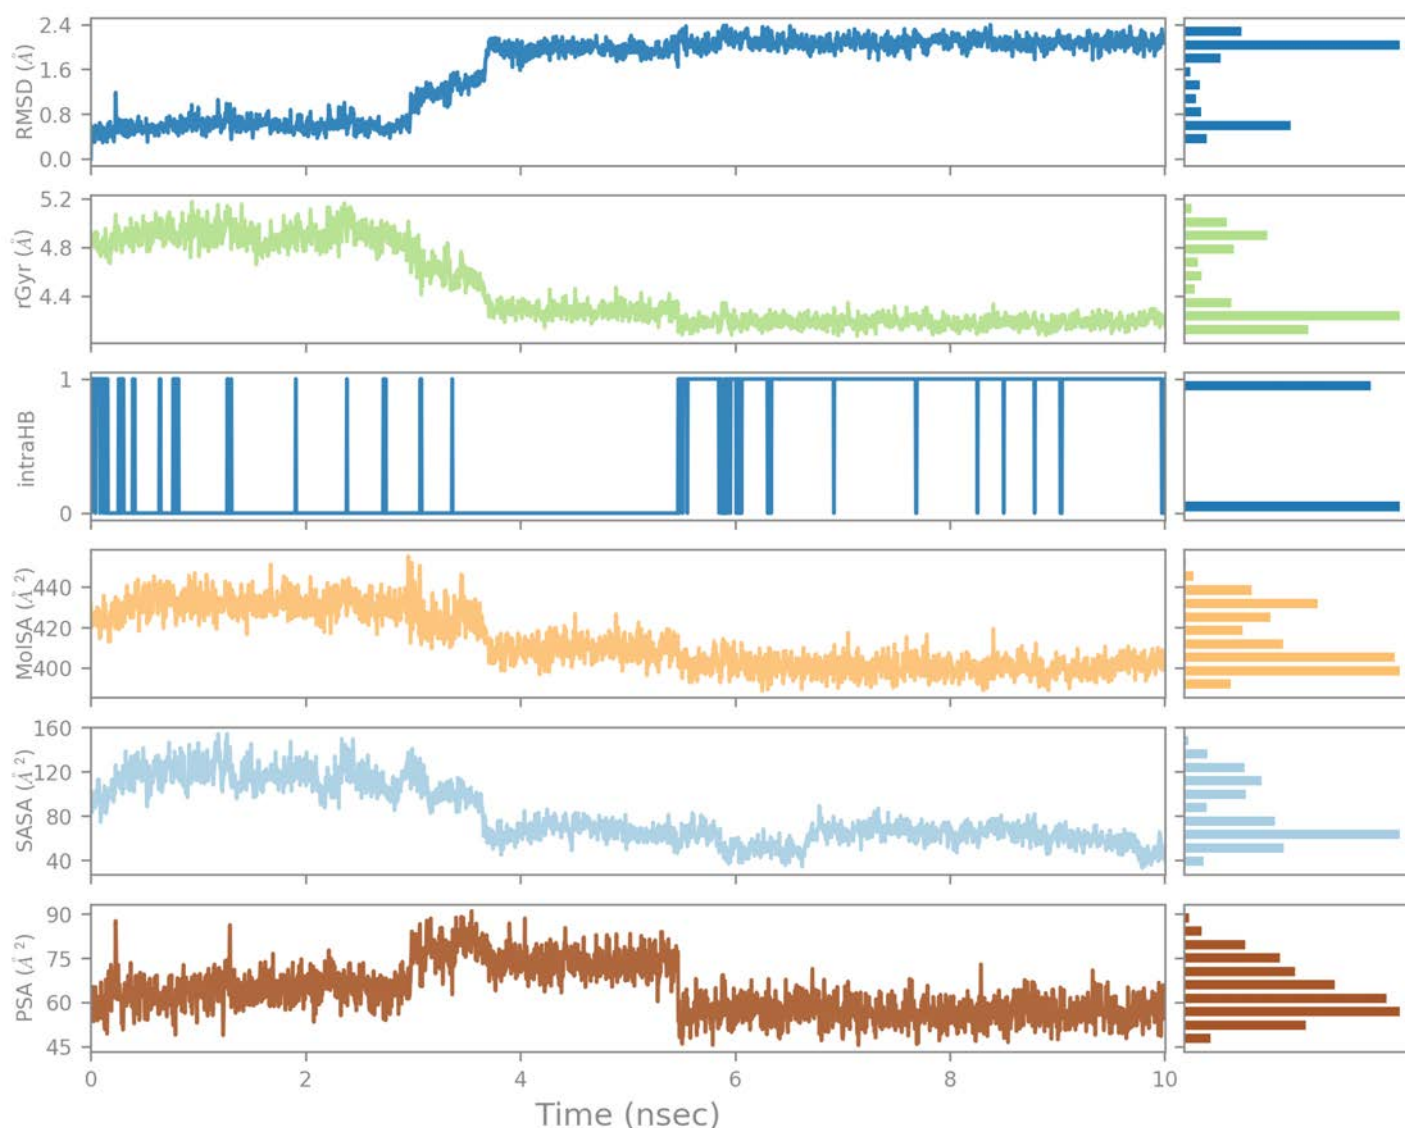

**Ligand RMSD:** Root mean square deviation of a ligand with respect to the reference conformation (typically the first frame is used as the reference and it is regarded as time  $t=0$ ).

**Radius of Gyration (rGyr):** Measures the 'extendedness' of a ligand, and is equivalent to its principal moment of inertia.

**Intramolecular Hydrogen Bonds (intraHB):** Number of internal hydrogen bonds (HB) within a ligand molecule.

**Molecular Surface Area (MolSA):** Molecular surface calculation with 1.4 Å probe radius. This value is equivalent to a van der Waals surface area.

**Solvent Accessible Surface Area (SASA):** Surface area of a molecule accessible by a water molecule.

**Polar Surface Area (PSA):** Solvent accessible surface area in a molecule contributed only by oxygen and nitrogen atoms.

## Report S12

# MD Simulation Report on BChE - *N-trans*-Feruloyltyramine Interactions

### Simulation Details

Jobname: md\_job\_6EP4\_5-dock-1  
Entry title: 6EP4\_5-dock-1

| CPU # | Job Type | Ensemble | Temp. [K] | Sim. Time [ns] | # Atoms | # Waters | Charge |
|-------|----------|----------|-----------|----------------|---------|----------|--------|
| 1     | mdsim    | NPT      | 300.0     | 10.005         | 51014   | 14193    | 0      |

### Protein Information

| Tot. Residues | Prot. Chain(s) | Res. in Chain(s)  | # Atoms | # Heavy Atoms | Charge |
|---------------|----------------|-------------------|---------|---------------|--------|
| 527           | 'NoChainId'    | ict_values([527]) | 8313    | 4203          | +2     |

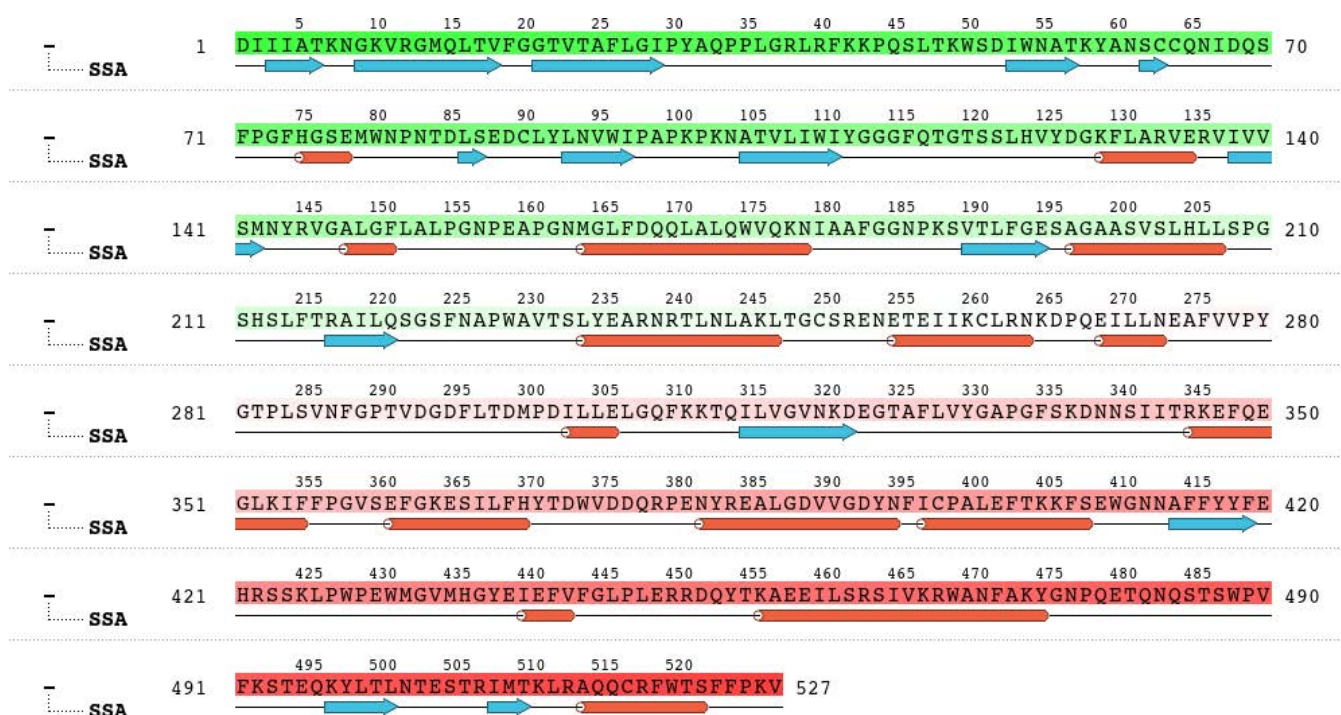

### Ligand Information

|                    |                                         |
|--------------------|-----------------------------------------|
| SMILES             | COc(cc1)c(O)cc1\C=C\C(=O)NCCc2ccc(O)cc2 |
| PDB Name           | 'UNK'                                   |
| Num. of Atoms      | 42 (total) 23 (heavy)                   |
| Atomic Mass        | 313.356 au                              |
| Charge             | 0                                       |
| Mol. Formula       | C18H19NO4                               |
| Num. of Fragments  | 4                                       |
| Num. of Rot. Bonds | 9                                       |

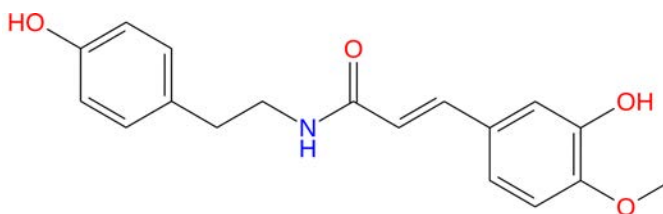

### Counter Ion/Salt Information

| Type | Num. | Concentration [mM] | Total Charge |
|------|------|--------------------|--------------|
| Cl   | 41   | 52.523             | -41          |
| Na   | 39   | 49.961             | +39          |



## Protein-Ligand RMSD

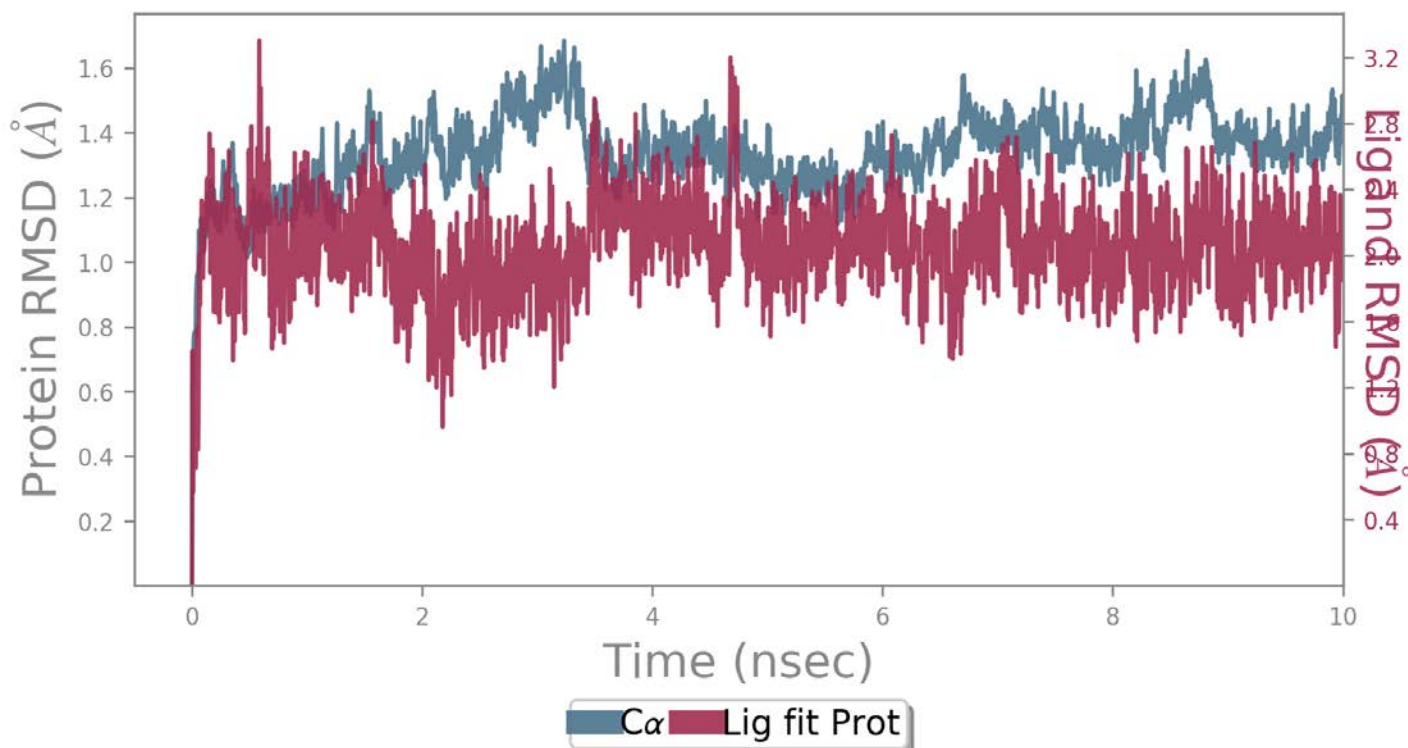

The Root Mean Square Deviation (RMSD) is used to measure the average change in displacement of a selection of atoms for a particular frame with respect to a reference frame. It is calculated for all frames in the trajectory. The RMSD for frame  $x$  is:

$$RMSD_x = \sqrt{\frac{1}{N} \sum_{i=1}^N (r'_i(t_x) - r_i(t_{ref}))^2}$$

where  $N$  is the number of atoms in the atom selection;  $t_{ref}$  is the reference time, (typically the first frame is used as the reference and it is regarded as time  $t=0$ ); and  $r'$  is the position of the selected atoms in frame  $x$  after superimposing on the reference frame, where frame  $x$  is recorded at time  $t_x$ . The procedure is repeated for every frame in the simulation trajectory.

**Protein RMSD:** The above plot shows the RMSD evolution of a protein (left Y-axis). All protein frames are first aligned on the reference frame backbone, and then the RMSD is calculated based on the atom selection. Monitoring the RMSD of the protein can give insights into its structural conformation throughout the simulation. RMSD analysis can indicate if the simulation has equilibrated — its fluctuations towards the end of the simulation are around some thermal average structure. Changes of the order of 1-3 Å are perfectly acceptable for small, globular proteins. Changes much larger than that, however, indicate that the protein is undergoing a large conformational change during the simulation. It is also important that your simulation converges — the RMSD values stabilize around a fixed value. If the RMSD of the protein is still increasing or decreasing on average at the end of the simulation, then your system has not equilibrated, and your simulation may not be long enough for rigorous analysis.

**Ligand RMSD:** Ligand RMSD (right Y-axis) indicates how stable the ligand is with respect to the protein and its binding pocket. In the above plot, 'Lig fit Prot' shows the RMSD of a ligand when the protein-ligand complex is first aligned on the protein backbone of the reference and then the RMSD of the ligand heavy atoms is measured. If the values observed are significantly larger than the RMSD of the protein, then it is likely that the ligand has diffused away from its initial binding site.

## Protein RMSF

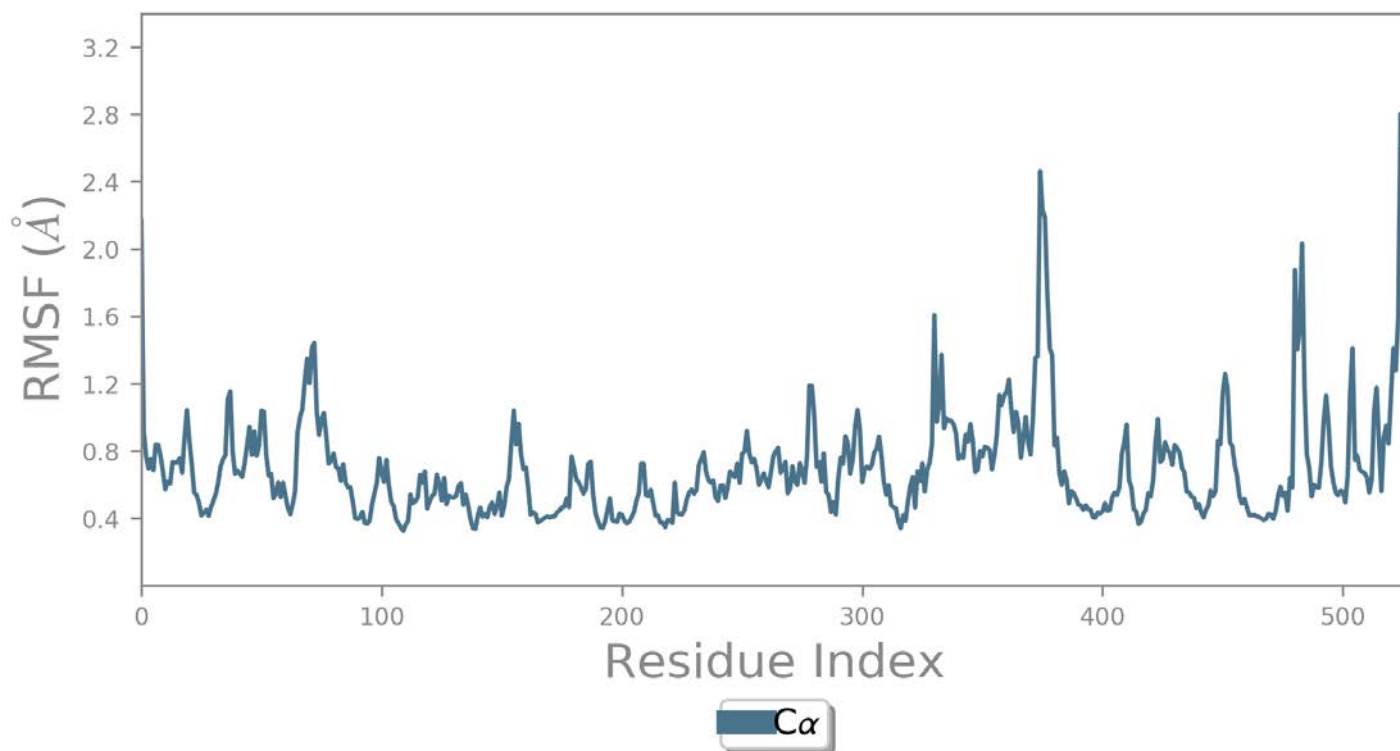

The Root Mean Square Fluctuation (RMSF) is useful for characterizing local changes along the protein chain. The RMSF for residue  $i$  is:

$$RMSF_i = \sqrt{\frac{1}{T} \sum_{t=1}^T \langle (r'_i(t)) - r_i(t_{ref})^2 \rangle}$$

where  $T$  is the trajectory time over which the RMSF is calculated,  $t_{ref}$  is the reference time,  $r_i$  is the position of residue  $i$ ;  $r'$  is the position of atoms in residue  $i$  after superposition on the reference, and the angle brackets indicate that the average of the square distance is taken over the selection of atoms in the residue.

On this plot, peaks indicate areas of the protein that fluctuate the most during the simulation. Typically you will observe that the tails ( $N$ - and  $C$ -terminal) fluctuate more than any other part of the protein. Secondary structure elements like alpha helices and beta strands are usually more rigid than the unstructured part of the protein, and thus fluctuate less than the loop regions.



## Protein Secondary Structure

% Helix  
27.86

% Strand  
13.74

% Total SSE  
41.61

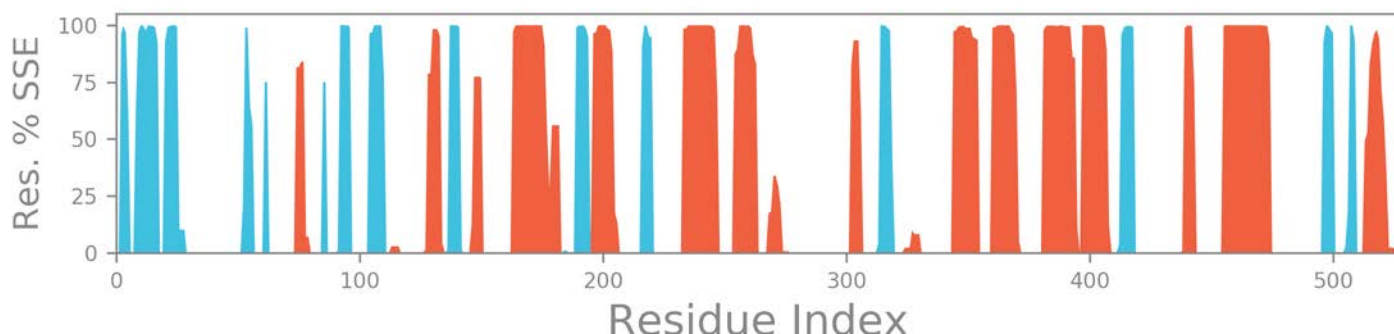

Protein secondary structure elements (SSE) like **alpha-helices** and **beta-strands** are monitored throughout the simulation. The plot above reports SSE distribution by residue index throughout the protein structure. The plot below summarizes the SSE composition for each trajectory frame over the course of the simulation, and the plot at the bottom monitors each residue and its SSE assignment over time.

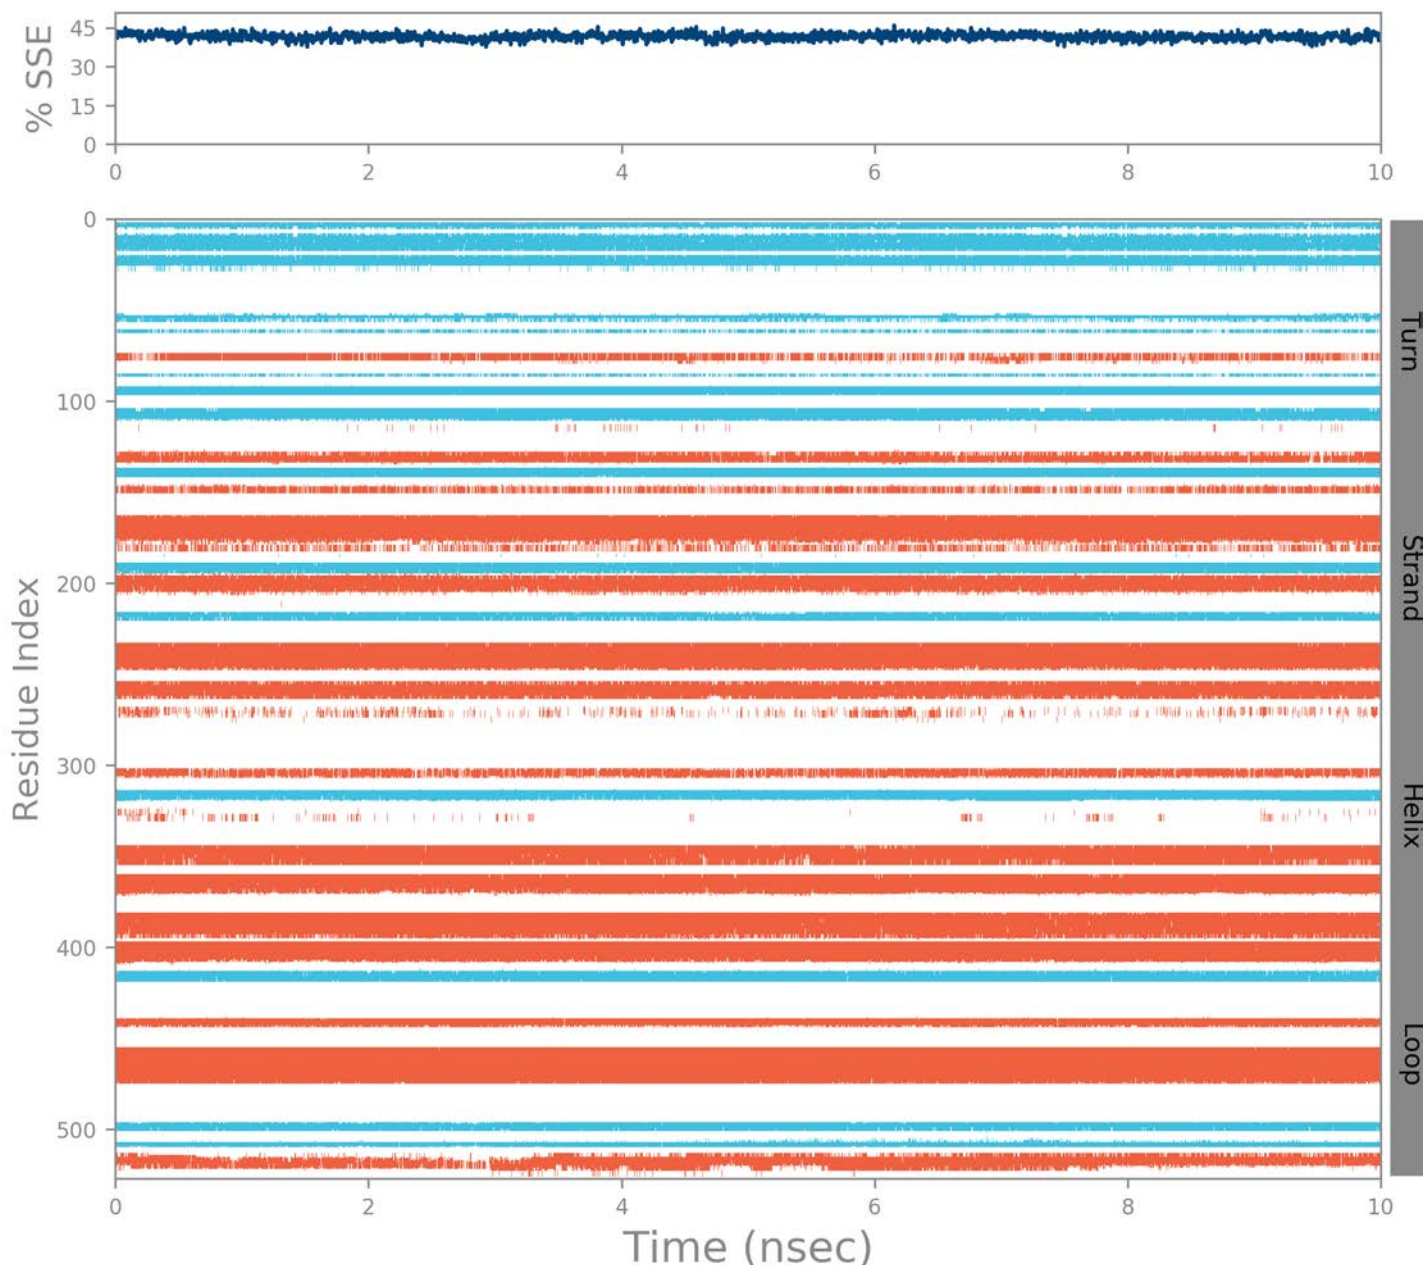

## RMSF of *N-trans*-Feruloyltyramine Ligand

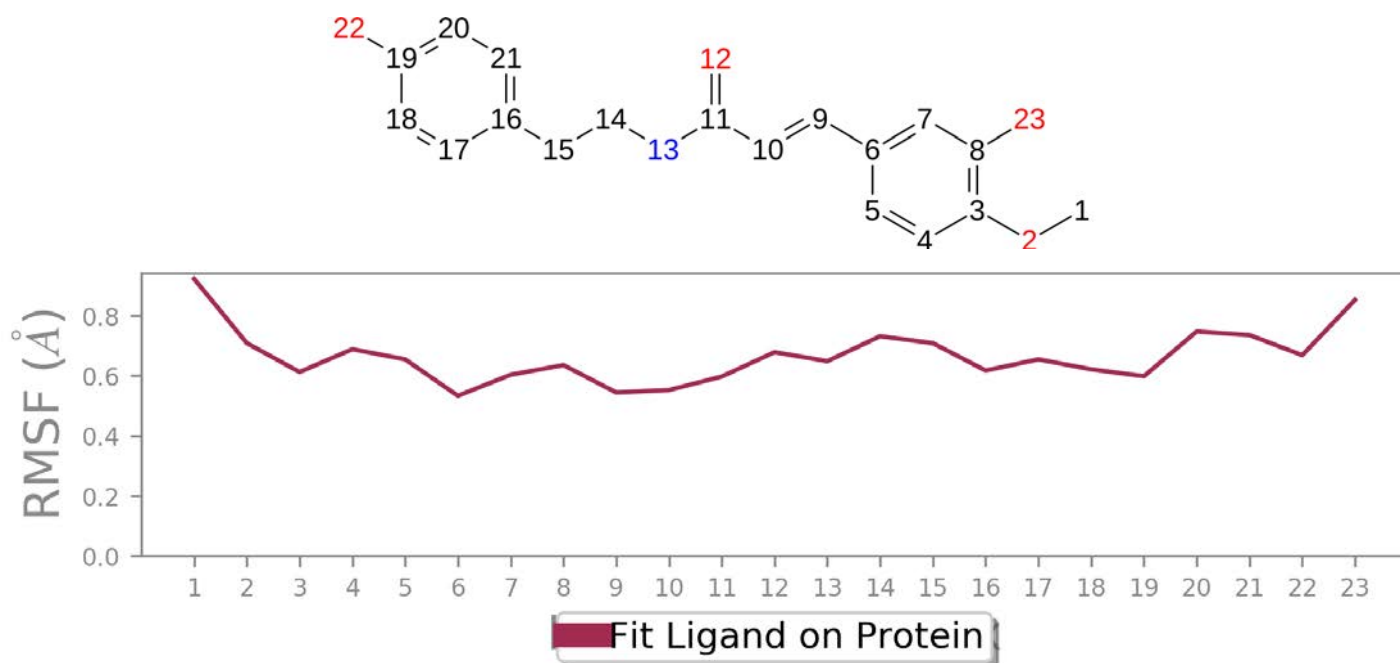

The Ligand Root Mean Square Fluctuation (L-RMSF) is useful for characterizing changes in the ligand atom positions. The RMSF for atom  $i$  is:

$$RMSF_i = \sqrt{\frac{1}{T} \sum_{t=1}^T (r'_i(t) - r_i(t_{ref}))^2}$$

where  $T$  is the trajectory time over which the RMSF is calculated,  $t_{ref}$  is the reference time (usually for the first frame, and is regarded as the zero of time);  $r$  is the position of atom  $i$  in the reference at time  $t_{ref}$  and  $r'$  is the position of atom  $i$  at time  $t$  after superposition on the reference frame.

Ligand RMSF shows the ligand's fluctuations broken down by atom, corresponding to the 2D structure in the top panel. The ligand RMSF may give you insights on how ligand fragments interact with the protein and their entropic role in the binding event. In the bottom panel, the 'Fit Ligand on Protein' line shows the ligand fluctuations, with respect to the protein. The protein-ligand complex is first aligned on the protein backbone and then the ligand RMSF is measured on the ligand heavy atoms.

## Protein-Ligand Contacts

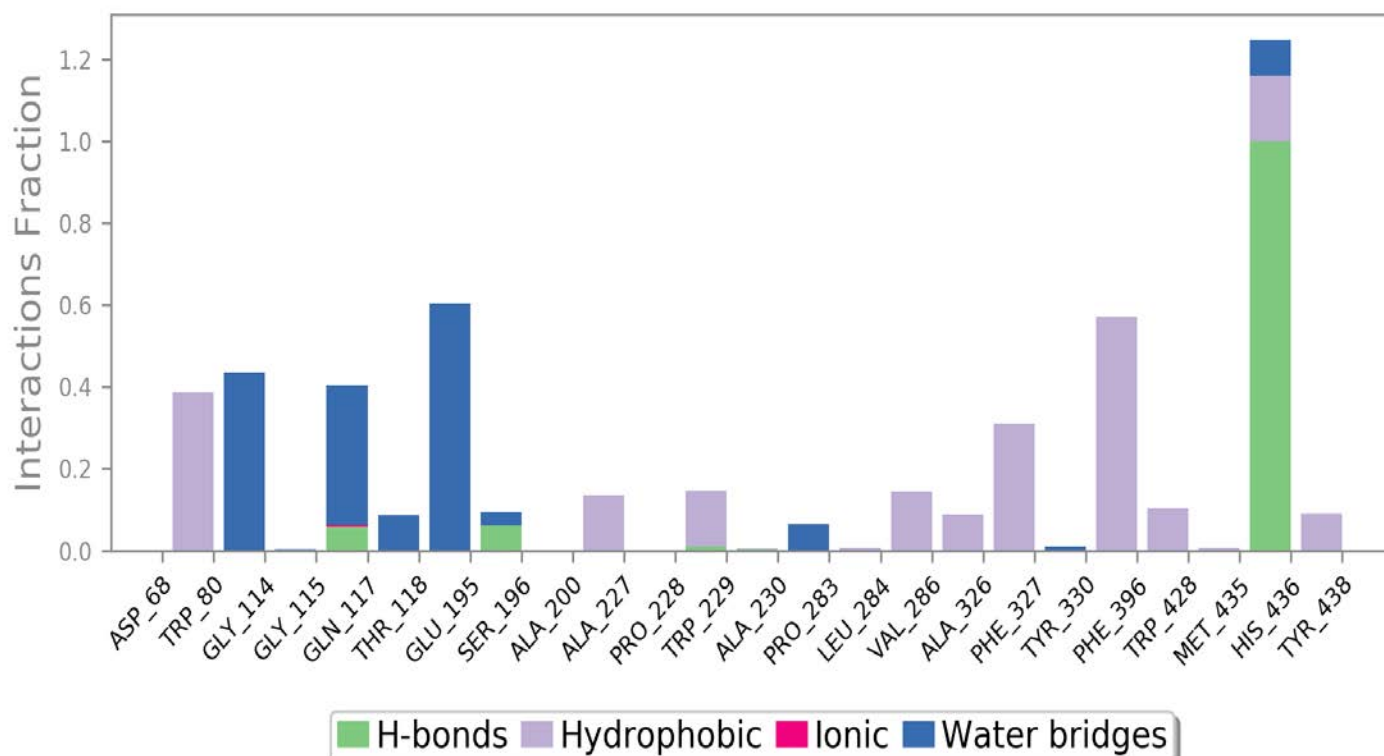

Protein interactions with the ligand can be monitored throughout the simulation. These interactions can be categorized by type and summarized, as shown in the plot above. Protein-ligand interactions (or 'contacts') are categorized into four types: Hydrogen Bonds, Hydrophobic, Ionic and Water Bridges. Each interaction type contains more specific subtypes, which can be explored through the 'Simulation Interactions Diagram' panel. The stacked bar charts are normalized over the course of the trajectory: for example, a value of 0.7 suggests that 70% of the simulation time the specific interaction is maintained. Values over 1.0 are possible as some protein residue may make multiple contacts of same subtype with the ligand.

**Hydrogen Bonds:** (H-bonds) play a significant role in ligand binding. Consideration of hydrogen-bonding properties in drug design is important because of their strong influence on drug specificity, metabolism and adsorption. Hydrogen bonds between a protein and a ligand can be further broken down into four subtypes: backbone acceptor; backbone donor; side-chain acceptor; side-chain donor.

The current geometric criteria for protein-ligand H-bond is: distance of 2.5 Å between the donor and acceptor atoms (D—H...A); a donor angle of  $\geq 120^\circ$  between the donor-hydrogen-acceptor atoms (D—H...A); and an acceptor angle of  $\geq 90^\circ$  between the hydrogen-acceptor-bonded\_atom atoms (H...A—X).

**Hydrophobic contacts:** fall into three subtypes:  $\pi$ -Cation;  $\pi$ - $\pi$ ; and Other, non-specific interactions. Generally these type of interactions involve a hydrophobic amino acid and an aromatic or aliphatic group on the ligand, but we have extended this category to also include  $\pi$ -Cation interactions.

The current geometric criteria for hydrophobic interactions is as follows:  $\pi$ -Cation — Aromatic and charged groups within 4.5 Å;  $\pi$ - $\pi$  — Two aromatic groups stacked face-to-face or face-to-edge; Other — A non-specific hydrophobic sidechain within 3.6 Å of a ligand's aromatic or aliphatic carbons.

**Ionic interactions:** or polar interactions, are between two oppositely charged atoms that are within 3.7 Å of each other and do not involve a hydrogen bond. We also monitor Protein-Metal-Ligand interactions, which are defined by a metal ion coordinated within 3.4 Å of protein's and ligand's heavy atoms (except carbon). All ionic interactions are broken down into two subtypes: those mediated by a protein backbone or side chains.

**Water Bridges:** are hydrogen-bonded protein-ligand interactions mediated by a water molecule. The hydrogen-bond geometry is slightly relaxed from the standard H-bond definition.

The current geometric criteria for a protein-water or water-ligand H-bond are: a distance of 2.8 Å between the donor and acceptor atoms (D—H...A); a donor angle of  $\geq 110^\circ$  between the donor-hydrogen-acceptor atoms (D—H...A); and an acceptor angle of  $\geq 90^\circ$  between the hydrogen-acceptor-bonded\_atom atoms (H...A—X).

## Protein-Ligand Contacts (cont.)

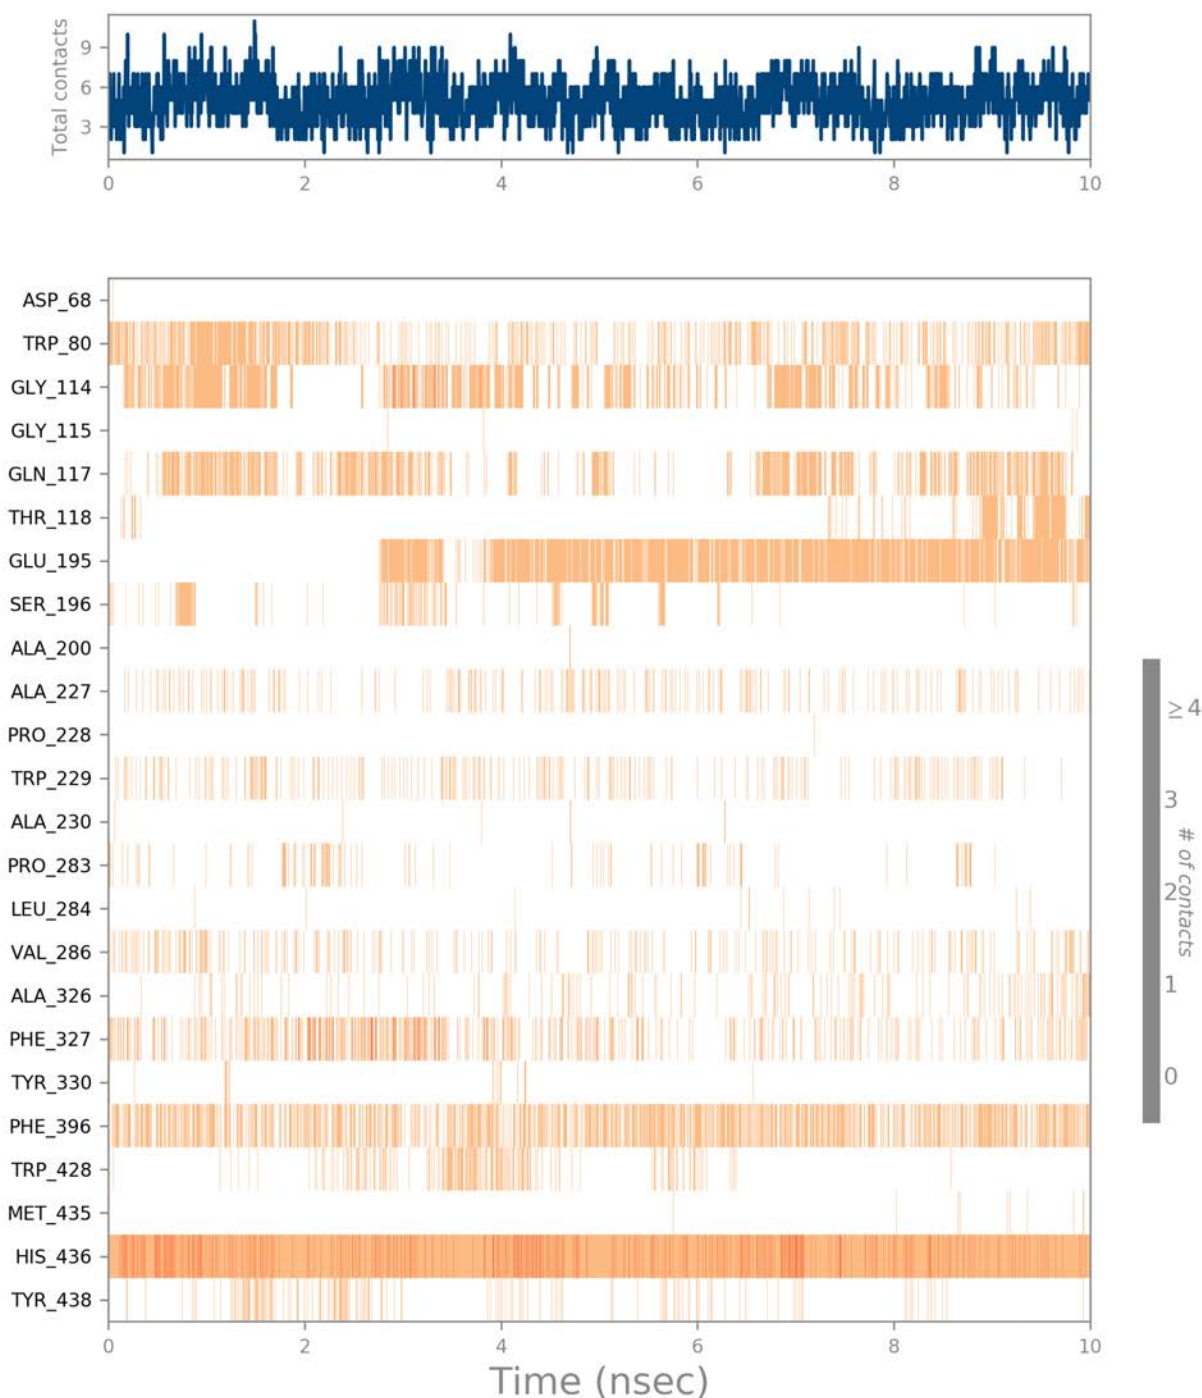

A timeline representation of the interactions and contacts (**H-bonds, Hydrophobic, Ionic, Water bridges**) summarized in the previous page. The top panel shows the total number of specific contacts the protein makes with the ligand over the course of the trajectory. The bottom panel shows which residues interact with the ligand in each trajectory frame. Some residues make more than one specific contact with the ligand, which is represented by a darker shade of orange, according to the scale to the right of the plot.



## Ligand-Protein Contacts

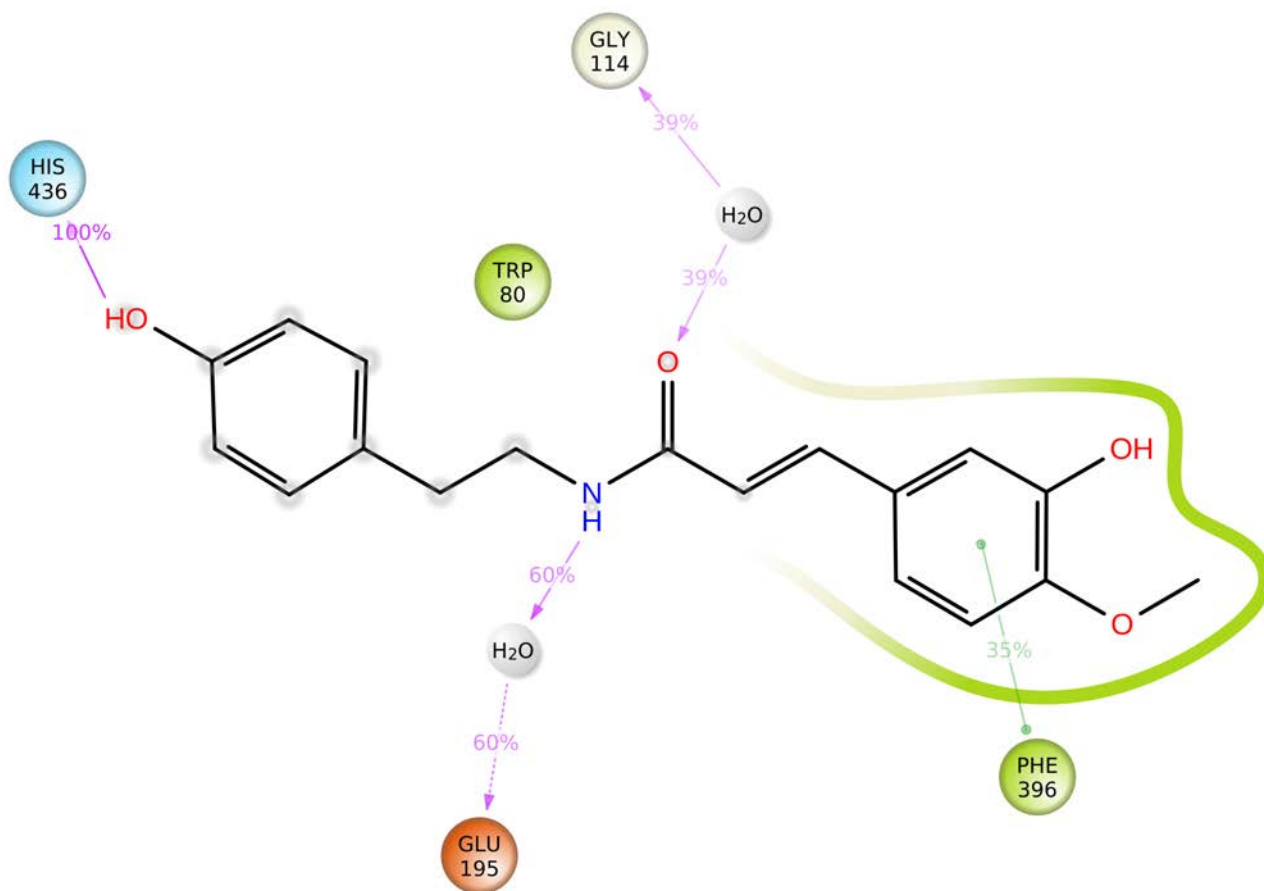

- |                    |             |                |                  |
|--------------------|-------------|----------------|------------------|
| Charged (negative) | Hydrophobic | Water          | Solvent exposure |
| Glycine            | Polar       | Pi-Pi stacking |                  |

A schematic of detailed ligand atom interactions with the protein residues. Interactions that occur more than **30.0%** of the simulation time in the selected trajectory ( 0.00 through 10.00 nsec), are shown.

Note: it is possible to have interactions with >100% as some residues may have multiple interactions of a single type with the same ligand atom. For example, the ARG side chain has four H-bond donors that can all hydrogen-bond to a single H-bond acceptor.

## Ligand Torsion Profile

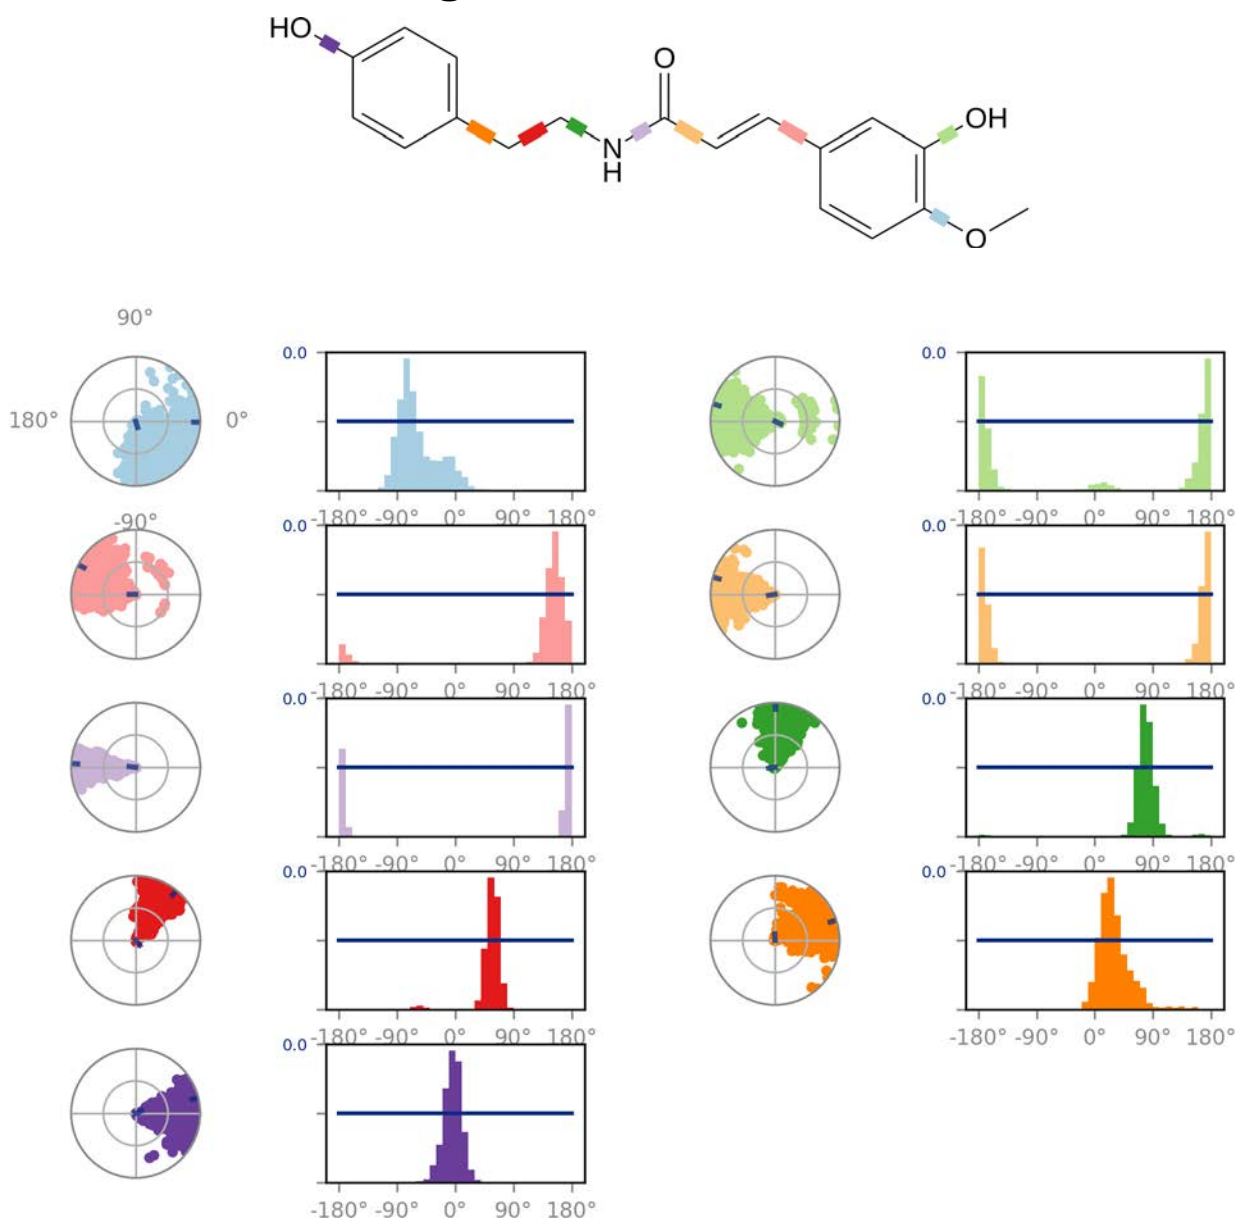

The ligand torsions plot summarizes the conformational evolution of every rotatable bond (RB) in the ligand throughout the simulation trajectory ( 0.00 through 10.00 nsec). The top panel shows the 2d schematic of a ligand with color-coded rotatable bonds. Each rotatable bond torsion is accompanied by a dial plot and bar plots of the same color.

Dial (or radial) plots describe the conformation of the torsion throughout the course of the simulation. The beginning of the simulation is in the center of the radial plot and the time evolution is plotted radially outwards.

The bar plots summarize the data on the dial plots, by showing the probability density of the torsion. If torsional potential information is available, the plot also shows the potential of the rotatable bond (by summing the potential of the related torsions). The values of the potential are on the left Y-axis of the chart, and are expressed in *kcal/mol*. Looking at the histogram and torsion potential relationships may give insights into the conformational strain the ligand undergoes to maintain a protein-bound conformation.

## Ligand Properties

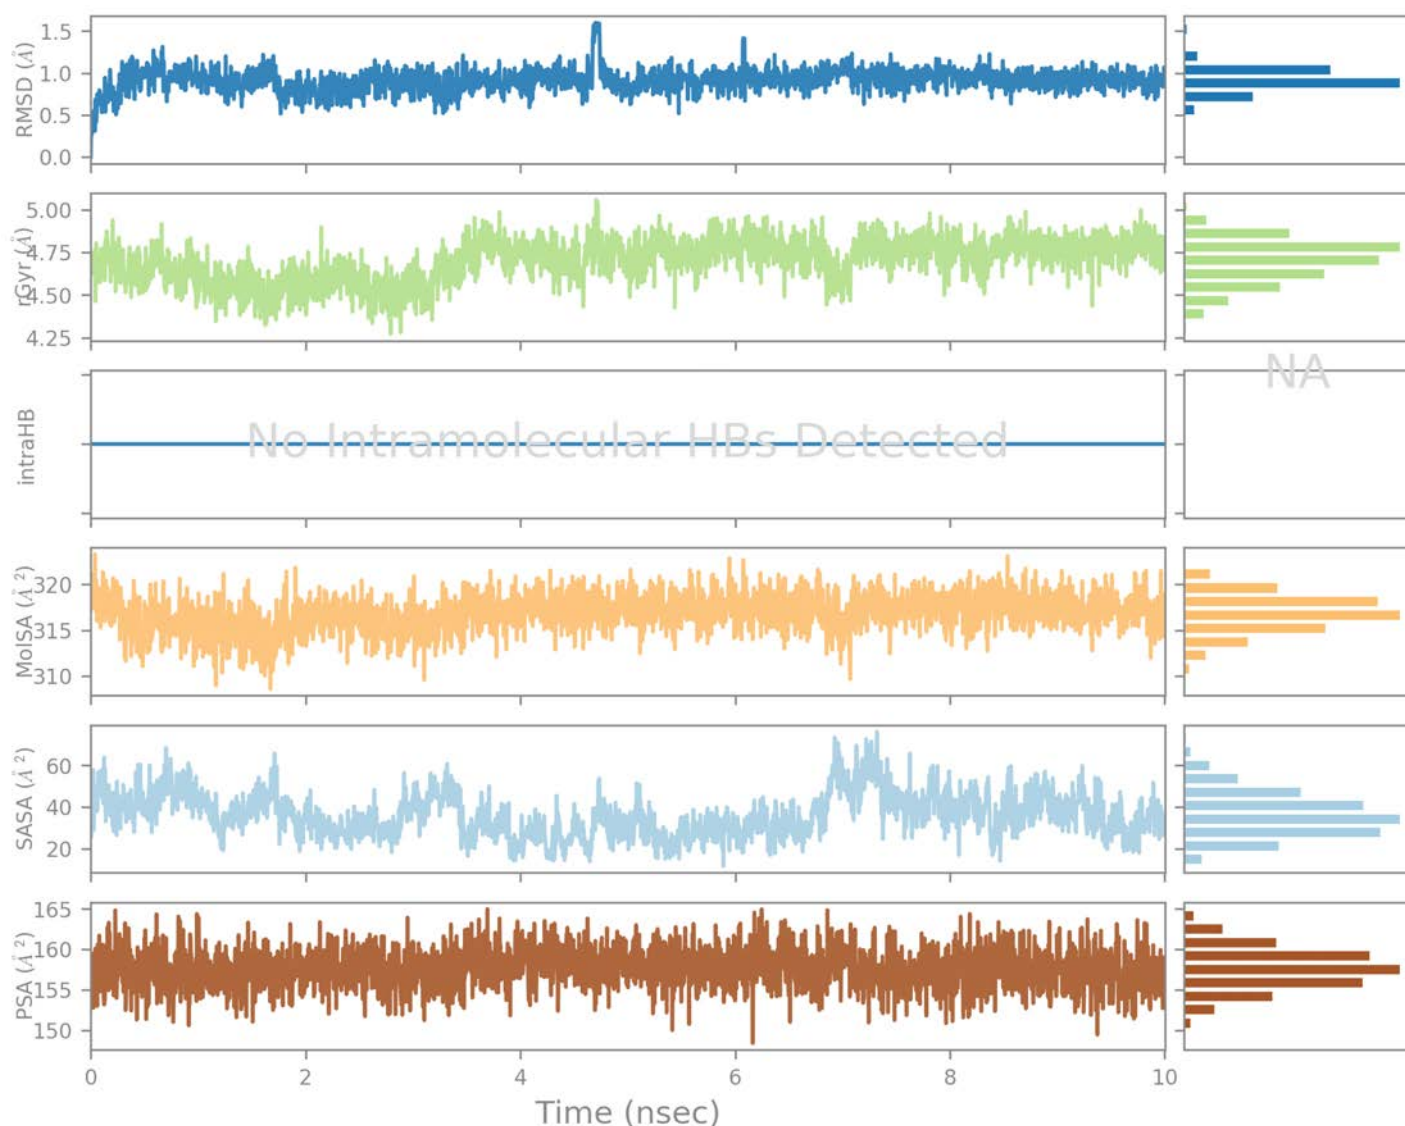

**Ligand RMSD:** Root mean square deviation of a ligand with respect to the reference conformation (typically the first frame is used as the reference and it is regarded as time  $t=0$ ).

**Radius of Gyration (rGyr):** Measures the 'extendedness' of a ligand, and is equivalent to its principal moment of inertia.

**Intramolecular Hydrogen Bonds (intraHB):** Number of internal hydrogen bonds (HB) within a ligand molecule.

**Molecular Surface Area (MolSA):** Molecular surface calculation with 1.4 Å probe radius. This value is equivalent to a van der Waals surface area.

**Solvent Accessible Surface Area (SASA):** Surface area of a molecule accessible by a water molecule.

**Polar Surface Area (PSA):** Solvent accessible surface area in a molecule contributed only by oxygen and nitrogen atoms.
